# Supplementary material for: Estrogen receptor 1 chromatin profiling in human breast tumors reveals high inter-patient heterogeneity with enrichment of risk SNPs and enhancer activity at most-conserved regions
Source: HighWire-hosted journal article supplement (doi:10.1101/gr.278680.123), 2024-05-06
Supplement: Supplemental_Table_S1.xlsx [file Supplemental_Table_S1.xlsx]

## Sheet: Supplemental_Table_S1
Supplemental Table S1 | Overview of ChIP-seq samples used in this manuscript
Sample ID	Type	Factor	GEO accession	Associated publication	Antibody
GSM1003708	Female patient sample	ESR1	GSE40867	Jansen MP, Knijnenburg T, Reijm EA, Simon I et al. Hallmarks of aromatase inhibitor drug resistance revealed by epigenetic profiling in breast cancer. Cancer Res 2013 Nov 15;73(22):6632-41. PMID: 24242068	SC-543; Santa Cruz
GSM1003711	Female patient sample	ESR1	GSE40867	Jansen MP, Knijnenburg T, Reijm EA, Simon I et al. Hallmarks of aromatase inhibitor drug resistance revealed by epigenetic profiling in breast cancer. Cancer Res 2013 Nov 15;73(22):6632-41. PMID: 24242068	SC-543; Santa Cruz
GSM1003714	Female patient sample	ESR1	GSE40867	Jansen MP, Knijnenburg T, Reijm EA, Simon I et al. Hallmarks of aromatase inhibitor drug resistance revealed by epigenetic profiling in breast cancer. Cancer Res 2013 Nov 15;73(22):6632-41. PMID: 24242068	SC-543; Santa Cruz
GSM1003717	Female patient sample	ESR1	GSE40867	Jansen MP, Knijnenburg T, Reijm EA, Simon I et al. Hallmarks of aromatase inhibitor drug resistance revealed by epigenetic profiling in breast cancer. Cancer Res 2013 Nov 15;73(22):6632-41. PMID: 24242068	SC-543; Santa Cruz
GSM1003720	Female patient sample	ESR1	GSE40867	Jansen MP, Knijnenburg T, Reijm EA, Simon I et al. Hallmarks of aromatase inhibitor drug resistance revealed by epigenetic profiling in breast cancer. Cancer Res 2013 Nov 15;73(22):6632-41. PMID: 24242068	SC-543; Santa Cruz
GSM1003723	Female patient sample	ESR1	GSE40867	Jansen MP, Knijnenburg T, Reijm EA, Simon I et al. Hallmarks of aromatase inhibitor drug resistance revealed by epigenetic profiling in breast cancer. Cancer Res 2013 Nov 15;73(22):6632-41. PMID: 24242068	SC-543; Santa Cruz
GSM1003726	Female patient sample	ESR1	GSE40867	Jansen MP, Knijnenburg T, Reijm EA, Simon I et al. Hallmarks of aromatase inhibitor drug resistance revealed by epigenetic profiling in breast cancer. Cancer Res 2013 Nov 15;73(22):6632-41. PMID: 24242068	SC-543; Santa Cruz
GSM1003728	Female patient sample	ESR1	GSE40867	Jansen MP, Knijnenburg T, Reijm EA, Simon I et al. Hallmarks of aromatase inhibitor drug resistance revealed by epigenetic profiling in breast cancer. Cancer Res 2013 Nov 15;73(22):6632-41. PMID: 24242068	SC-543; Santa Cruz
GSM1003734	Female patient sample	ESR1	GSE40867	Jansen MP, Knijnenburg T, Reijm EA, Simon I et al. Hallmarks of aromatase inhibitor drug resistance revealed by epigenetic profiling in breast cancer. Cancer Res 2013 Nov 15;73(22):6632-41. PMID: 24242068	SC-543; Santa Cruz
GSM1003737	Female patient sample	ESR1	GSE40867	Jansen MP, Knijnenburg T, Reijm EA, Simon I et al. Hallmarks of aromatase inhibitor drug resistance revealed by epigenetic profiling in breast cancer. Cancer Res 2013 Nov 15;73(22):6632-41. PMID: 24242068	SC-543; Santa Cruz
GSM1003740	Female patient sample	ESR1	GSE40867	Jansen MP, Knijnenburg T, Reijm EA, Simon I et al. Hallmarks of aromatase inhibitor drug resistance revealed by epigenetic profiling in breast cancer. Cancer Res 2013 Nov 15;73(22):6632-41. PMID: 24242068	SC-543; Santa Cruz
GSM798383	Female patient sample	ESR1	GSE32222	Ross-Innes CS, Stark R, Teschendorff AE, Holmes KA et al. Differential oestrogen receptor binding is associated with clinical outcome in breast cancer. Nature 2012 Jan 4;481(7381):389-93. PMID: 22217937	SC-543; Santa Cruz
GSM798384	Female patient sample	ESR1	GSE32222	Ross-Innes CS, Stark R, Teschendorff AE, Holmes KA et al. Differential oestrogen receptor binding is associated with clinical outcome in breast cancer. Nature 2012 Jan 4;481(7381):389-93. PMID: 22217937	SC-543; Santa Cruz
GSM798385	Female patient sample	ESR1	GSE32222	Ross-Innes CS, Stark R, Teschendorff AE, Holmes KA et al. Differential oestrogen receptor binding is associated with clinical outcome in breast cancer. Nature 2012 Jan 4;481(7381):389-93. PMID: 22217937	SC-543; Santa Cruz
GSM798386	Female patient sample	ESR1	GSE32222	Ross-Innes CS, Stark R, Teschendorff AE, Holmes KA et al. Differential oestrogen receptor binding is associated with clinical outcome in breast cancer. Nature 2012 Jan 4;481(7381):389-93. PMID: 22217937	SC-543; Santa Cruz
GSM798387	Female patient sample	ESR1	GSE32222	Ross-Innes CS, Stark R, Teschendorff AE, Holmes KA et al. Differential oestrogen receptor binding is associated with clinical outcome in breast cancer. Nature 2012 Jan 4;481(7381):389-93. PMID: 22217937	SC-543; Santa Cruz
GSM798388	Female patient sample	ESR1	GSE32222	Ross-Innes CS, Stark R, Teschendorff AE, Holmes KA et al. Differential oestrogen receptor binding is associated with clinical outcome in breast cancer. Nature 2012 Jan 4;481(7381):389-93. PMID: 22217937	SC-543; Santa Cruz
GSM798389	Female patient sample	ESR1	GSE32222	Ross-Innes CS, Stark R, Teschendorff AE, Holmes KA et al. Differential oestrogen receptor binding is associated with clinical outcome in breast cancer. Nature 2012 Jan 4;481(7381):389-93. PMID: 22217937	SC-543; Santa Cruz
GSM798390	Female patient sample	ESR1	GSE32222	Ross-Innes CS, Stark R, Teschendorff AE, Holmes KA et al. Differential oestrogen receptor binding is associated with clinical outcome in breast cancer. Nature 2012 Jan 4;481(7381):389-93. PMID: 22217937	SC-543; Santa Cruz
GSM798391	Female patient sample	ESR1	GSE32222	Ross-Innes CS, Stark R, Teschendorff AE, Holmes KA et al. Differential oestrogen receptor binding is associated with clinical outcome in breast cancer. Nature 2012 Jan 4;481(7381):389-93. PMID: 22217937	SC-543; Santa Cruz
GSM798392	Female patient sample	ESR1	GSE32222	Ross-Innes CS, Stark R, Teschendorff AE, Holmes KA et al. Differential oestrogen receptor binding is associated with clinical outcome in breast cancer. Nature 2012 Jan 4;481(7381):389-93. PMID: 22217937	SC-543; Santa Cruz
GSM798393	Female patient sample	ESR1	GSE32222	Ross-Innes CS, Stark R, Teschendorff AE, Holmes KA et al. Differential oestrogen receptor binding is associated with clinical outcome in breast cancer. Nature 2012 Jan 4;481(7381):389-93. PMID: 22217937	SC-543; Santa Cruz
GSM798394	Female patient sample	ESR1	GSE32222	Ross-Innes CS, Stark R, Teschendorff AE, Holmes KA et al. Differential oestrogen receptor binding is associated with clinical outcome in breast cancer. Nature 2012 Jan 4;481(7381):389-93. PMID: 22217937	SC-543; Santa Cruz
GSM798395	Female patient sample	ESR1	GSE32222	Ross-Innes CS, Stark R, Teschendorff AE, Holmes KA et al. Differential oestrogen receptor binding is associated with clinical outcome in breast cancer. Nature 2012 Jan 4;481(7381):389-93. PMID: 22217937	SC-543; Santa Cruz
GSM798396	Female patient sample	ESR1	GSE32222	Ross-Innes CS, Stark R, Teschendorff AE, Holmes KA et al. Differential oestrogen receptor binding is associated with clinical outcome in breast cancer. Nature 2012 Jan 4;481(7381):389-93. PMID: 22217937	SC-543; Santa Cruz
GSM798397	Female patient sample	ESR1	GSE32222	Ross-Innes CS, Stark R, Teschendorff AE, Holmes KA et al. Differential oestrogen receptor binding is associated with clinical outcome in breast cancer. Nature 2012 Jan 4;481(7381):389-93. PMID: 22217937	SC-543; Santa Cruz
GSM798398	Female patient sample	ESR1	GSE32222	Ross-Innes CS, Stark R, Teschendorff AE, Holmes KA et al. Differential oestrogen receptor binding is associated with clinical outcome in breast cancer. Nature 2012 Jan 4;481(7381):389-93. PMID: 22217937	SC-543; Santa Cruz
GSM798399	Female patient sample	ESR1	GSE32222	Ross-Innes CS, Stark R, Teschendorff AE, Holmes KA et al. Differential oestrogen receptor binding is associated with clinical outcome in breast cancer. Nature 2012 Jan 4;481(7381):389-93. PMID: 22217937	SC-543; Santa Cruz
GSM798400	Female patient sample	ESR1	GSE32222	Ross-Innes CS, Stark R, Teschendorff AE, Holmes KA et al. Differential oestrogen receptor binding is associated with clinical outcome in breast cancer. Nature 2012 Jan 4;481(7381):389-93. PMID: 22217937	SC-543; Santa Cruz
GSM2797074	Female patient sample	ESR1	GSE104399	Severson TM, Kim Y, Joosten SEP, Schuurman K et al. Characterizing steroid hormone receptor chromatin binding landscapes in male and female breast cancer. Nat Commun 2018 Feb 2;9(1):482. PMID: 29396493	SC-543; Santa Cruz
GSM2797075	Female patient sample	ESR1	GSE104399	Severson TM, Kim Y, Joosten SEP, Schuurman K et al. Characterizing steroid hormone receptor chromatin binding landscapes in male and female breast cancer. Nat Commun 2018 Feb 2;9(1):482. PMID: 29396493	SC-543; Santa Cruz
GSM2797076	Female patient sample	ESR1	GSE104399	Severson TM, Kim Y, Joosten SEP, Schuurman K et al. Characterizing steroid hormone receptor chromatin binding landscapes in male and female breast cancer. Nat Commun 2018 Feb 2;9(1):482. PMID: 29396493	SC-543; Santa Cruz
GSM2797081	Female patient sample	ESR1	GSE104399	Severson TM, Kim Y, Joosten SEP, Schuurman K et al. Characterizing steroid hormone receptor chromatin binding landscapes in male and female breast cancer. Nat Commun 2018 Feb 2;9(1):482. PMID: 29396493	SC-543; Santa Cruz
GSM2797082	Female patient sample	ESR1	GSE104399	Severson TM, Kim Y, Joosten SEP, Schuurman K et al. Characterizing steroid hormone receptor chromatin binding landscapes in male and female breast cancer. Nat Commun 2018 Feb 2;9(1):482. PMID: 29396493	SC-543; Santa Cruz
GSM2797086	Female patient sample	ESR1	GSE104399	Severson TM, Kim Y, Joosten SEP, Schuurman K et al. Characterizing steroid hormone receptor chromatin binding landscapes in male and female breast cancer. Nat Commun 2018 Feb 2;9(1):482. PMID: 29396493	SC-543; Santa Cruz
GSM7830649	Female patient sample	ESR1	GSE244840 / EGAS50000000008	Joosten SEP et al, Breast cancer risk SNPs converge on commonly shared estrogen receptor binding sites to locally alter estrogen signalling output [This work]	SC-543; Santa Cruz
GSM7830650	Female patient sample	ESR1	GSE244840 / EGAS50000000008	Joosten SEP et al, Breast cancer risk SNPs converge on commonly shared estrogen receptor binding sites to locally alter estrogen signalling output [This work]	SC-543; Santa Cruz
GSM7830651	Female patient sample	ESR1	GSE244840 / EGAS50000000008	Joosten SEP et al, Breast cancer risk SNPs converge on commonly shared estrogen receptor binding sites to locally alter estrogen signalling output [This work]	SC-543; Santa Cruz
GSM7830652	Female patient sample	ESR1	GSE244840 / EGAS50000000008	Joosten SEP et al, Breast cancer risk SNPs converge on commonly shared estrogen receptor binding sites to locally alter estrogen signalling output [This work]	SC-543; Santa Cruz
GSM7830653	Female patient sample	ESR1	GSE244840 / EGAS50000000008	Joosten SEP et al, Breast cancer risk SNPs converge on commonly shared estrogen receptor binding sites to locally alter estrogen signalling output [This work]	SC-543; Santa Cruz
GSM2797090	Male patient sample	ESR1	GSE104399	Severson TM, Kim Y, Joosten SEP, Schuurman K et al. Characterizing steroid hormone receptor chromatin binding landscapes in male and female breast cancer. Nat Commun 2018 Feb 2;9(1):482. PMID: 29396498	SC-543; Santa Cruz
GSM2797091	Male patient sample	ESR1	GSE104399	Severson TM, Kim Y, Joosten SEP, Schuurman K et al. Characterizing steroid hormone receptor chromatin binding landscapes in male and female breast cancer. Nat Commun 2018 Feb 2;9(1):482. PMID: 29396498	SC-543; Santa Cruz
GSM2797092	Male patient sample	ESR1	GSE104399	Severson TM, Kim Y, Joosten SEP, Schuurman K et al. Characterizing steroid hormone receptor chromatin binding landscapes in male and female breast cancer. Nat Commun 2018 Feb 2;9(1):482. PMID: 29396498	SC-543; Santa Cruz
GSM2797093	Male patient sample	ESR1	GSE104399	Severson TM, Kim Y, Joosten SEP, Schuurman K et al. Characterizing steroid hormone receptor chromatin binding landscapes in male and female breast cancer. Nat Commun 2018 Feb 2;9(1):482. PMID: 29396498	SC-543; Santa Cruz
GSM2797094	Male patient sample	ESR1	GSE104399	Severson TM, Kim Y, Joosten SEP, Schuurman K et al. Characterizing steroid hormone receptor chromatin binding landscapes in male and female breast cancer. Nat Commun 2018 Feb 2;9(1):482. PMID: 29396498	SC-543; Santa Cruz
GSM2797095	Male patient sample	ESR1	GSE104399	Severson TM, Kim Y, Joosten SEP, Schuurman K et al. Characterizing steroid hormone receptor chromatin binding landscapes in male and female breast cancer. Nat Commun 2018 Feb 2;9(1):482. PMID: 29396498	SC-543; Santa Cruz
GSM2797096	Male patient sample	ESR1	GSE104399	Severson TM, Kim Y, Joosten SEP, Schuurman K et al. Characterizing steroid hormone receptor chromatin binding landscapes in male and female breast cancer. Nat Commun 2018 Feb 2;9(1):482. PMID: 29396498	SC-543; Santa Cruz
GSM2797097	Male patient sample	ESR1	GSE104399	Severson TM, Kim Y, Joosten SEP, Schuurman K et al. Characterizing steroid hormone receptor chromatin binding landscapes in male and female breast cancer. Nat Commun 2018 Feb 2;9(1):482. PMID: 29396498	SC-543; Santa Cruz
GSM2797098	Male patient sample	ESR1	GSE104399	Severson TM, Kim Y, Joosten SEP, Schuurman K et al. Characterizing steroid hormone receptor chromatin binding landscapes in male and female breast cancer. Nat Commun 2018 Feb 2;9(1):482. PMID: 29396498	SC-543; Santa Cruz
GSM2797099	Male patient sample	ESR1	GSE104399	Severson TM, Kim Y, Joosten SEP, Schuurman K et al. Characterizing steroid hormone receptor chromatin binding landscapes in male and female breast cancer. Nat Commun 2018 Feb 2;9(1):482. PMID: 29396498	SC-543; Santa Cruz
GSM2797100	Male patient sample	ESR1	GSE104399	Severson TM, Kim Y, Joosten SEP, Schuurman K et al. Characterizing steroid hormone receptor chromatin binding landscapes in male and female breast cancer. Nat Commun 2018 Feb 2;9(1):482. PMID: 29396498	SC-543; Santa Cruz
GSM2797101	Male patient sample	ESR1	GSE104399	Severson TM, Kim Y, Joosten SEP, Schuurman K et al. Characterizing steroid hormone receptor chromatin binding landscapes in male and female breast cancer. Nat Commun 2018 Feb 2;9(1):482. PMID: 29396498	SC-543; Santa Cruz
GSM2797102	Male patient sample	ESR1	GSE104399	Severson TM, Kim Y, Joosten SEP, Schuurman K et al. Characterizing steroid hormone receptor chromatin binding landscapes in male and female breast cancer. Nat Commun 2018 Feb 2;9(1):482. PMID: 29396498	SC-543; Santa Cruz
GSM2797103	Male patient sample	ESR1	GSE104399	Severson TM, Kim Y, Joosten SEP, Schuurman K et al. Characterizing steroid hormone receptor chromatin binding landscapes in male and female breast cancer. Nat Commun 2018 Feb 2;9(1):482. PMID: 29396498	SC-543; Santa Cruz
GSM2797104	Male patient sample	ESR1	GSE104399	Severson TM, Kim Y, Joosten SEP, Schuurman K et al. Characterizing steroid hormone receptor chromatin binding landscapes in male and female breast cancer. Nat Commun 2018 Feb 2;9(1):482. PMID: 29396498	SC-543; Santa Cruz
GSM2797105	Male patient sample	ESR1	GSE104399	Severson TM, Kim Y, Joosten SEP, Schuurman K et al. Characterizing steroid hormone receptor chromatin binding landscapes in male and female breast cancer. Nat Commun 2018 Feb 2;9(1):482. PMID: 29396498	SC-543; Santa Cruz
GSM2797106	Male patient sample	ESR1	GSE104399	Severson TM, Kim Y, Joosten SEP, Schuurman K et al. Characterizing steroid hormone receptor chromatin binding landscapes in male and female breast cancer. Nat Commun 2018 Feb 2;9(1):482. PMID: 29396498	SC-543; Santa Cruz
GSM2797107	Male patient sample	ESR1	GSE104399	Severson TM, Kim Y, Joosten SEP, Schuurman K et al. Characterizing steroid hormone receptor chromatin binding landscapes in male and female breast cancer. Nat Commun 2018 Feb 2;9(1):482. PMID: 29396498	SC-543; Santa Cruz
GSM2797108	Male patient sample	ESR1	GSE104399	Severson TM, Kim Y, Joosten SEP, Schuurman K et al. Characterizing steroid hormone receptor chromatin binding landscapes in male and female breast cancer. Nat Commun 2018 Feb 2;9(1):482. PMID: 29396498	SC-543; Santa Cruz
GSM2797109	Male patient sample	ESR1	GSE104399	Severson TM, Kim Y, Joosten SEP, Schuurman K et al. Characterizing steroid hormone receptor chromatin binding landscapes in male and female breast cancer. Nat Commun 2018 Feb 2;9(1):482. PMID: 29396498	SC-543; Santa Cruz
GSM2797110	Male patient sample	ESR1	GSE104399	Severson TM, Kim Y, Joosten SEP, Schuurman K et al. Characterizing steroid hormone receptor chromatin binding landscapes in male and female breast cancer. Nat Commun 2018 Feb 2;9(1):482. PMID: 29396498	SC-543; Santa Cruz
GSM2797111	Male patient sample	ESR1	GSE104399	Severson TM, Kim Y, Joosten SEP, Schuurman K et al. Characterizing steroid hormone receptor chromatin binding landscapes in male and female breast cancer. Nat Commun 2018 Feb 2;9(1):482. PMID: 29396498	SC-543; Santa Cruz
GSM2797112	Male patient sample	ESR1	GSE104399	Severson TM, Kim Y, Joosten SEP, Schuurman K et al. Characterizing steroid hormone receptor chromatin binding landscapes in male and female breast cancer. Nat Commun 2018 Feb 2;9(1):482. PMID: 29396498	SC-543; Santa Cruz
GSM2797113	Male patient sample	ESR1	GSE104399	Severson TM, Kim Y, Joosten SEP, Schuurman K et al. Characterizing steroid hormone receptor chromatin binding landscapes in male and female breast cancer. Nat Commun 2018 Feb 2;9(1):482. PMID: 29396498	SC-543; Santa Cruz
GSM2797114	Male patient sample	ESR1	GSE104399	Severson TM, Kim Y, Joosten SEP, Schuurman K et al. Characterizing steroid hormone receptor chromatin binding landscapes in male and female breast cancer. Nat Commun 2018 Feb 2;9(1):482. PMID: 29396498	SC-543; Santa Cruz
GSM2797115	Male patient sample	ESR1	GSE104399	Severson TM, Kim Y, Joosten SEP, Schuurman K et al. Characterizing steroid hormone receptor chromatin binding landscapes in male and female breast cancer. Nat Commun 2018 Feb 2;9(1):482. PMID: 29396498	SC-543; Santa Cruz
GSM2797116	Male patient sample	ESR1	GSE104399	Severson TM, Kim Y, Joosten SEP, Schuurman K et al. Characterizing steroid hormone receptor chromatin binding landscapes in male and female breast cancer. Nat Commun 2018 Feb 2;9(1):482. PMID: 29396498	SC-543; Santa Cruz
GSM2797117	Male patient sample	ESR1	GSE104399	Severson TM, Kim Y, Joosten SEP, Schuurman K et al. Characterizing steroid hormone receptor chromatin binding landscapes in male and female breast cancer. Nat Commun 2018 Feb 2;9(1):482. PMID: 29396498	SC-543; Santa Cruz
GSM2797118	Male patient sample	ESR1	GSE104399	Severson TM, Kim Y, Joosten SEP, Schuurman K et al. Characterizing steroid hormone receptor chromatin binding landscapes in male and female breast cancer. Nat Commun 2018 Feb 2;9(1):482. PMID: 29396498	SC-543; Santa Cruz
GSM2797119	Male patient sample	ESR1	GSE104399	Severson TM, Kim Y, Joosten SEP, Schuurman K et al. Characterizing steroid hormone receptor chromatin binding landscapes in male and female breast cancer. Nat Commun 2018 Feb 2;9(1):482. PMID: 29396498	SC-543; Santa Cruz
GSM1669011	Cell line T47D	ESR1	GSE68359	Mohammed, H., et al. (2015). "Progesterone receptor modulates ERalpha action in breast cancer." Nature 523(7560): 313-317.	SC-543; Santa Cruz
GSM798428	Cell line T47D	ESR1	GSE32222	Ross-Innes, C. S., et al. (2012). "Differential oestrogen receptor binding is associated with clinical outcome in breast cancer." Nature 481(7381): 389-393.	SC-543; Santa Cruz
GSM798429	Cell line T47D	ESR1	GSE32222	Ross-Innes, C. S., et al. (2012). "Differential oestrogen receptor binding is associated with clinical outcome in breast cancer." Nature 481(7381): 389-393.	SC-543; Santa Cruz
GSM1669013	Cell line T47D	ESR1	GSE68359	Mohammed, H., et al. (2015). "Progesterone receptor modulates ERalpha action in breast cancer." Nature 523(7560): 313-317.	SC-543; Santa Cruz
GSM1669011	Cell line T47D	ESR1	GSE68359	Mohammed, H., et al. (2015). "Progesterone receptor modulates ERalpha action in breast cancer." Nature 523(7560): 313-317.	SC-543; Santa Cruz
GSM798428	Cell line T47D	ESR1	GSE32222	Ross-Innes CS, Stark R, Teschendorff AE, Holmes KA et al. Differential oestrogen receptor binding is associated with clinical outcome in breast cancer. Nature 2012 Jan 4;481(7381):389-93. PMID: 22217954	SC-543; Santa Cruz
GSM798423	Cell line MCF-7	ESR1	GSE32222	Ross-Innes CS, Stark R, Teschendorff AE, Holmes KA et al. Differential oestrogen receptor binding is associated with clinical outcome in breast cancer. Nature 2012 Jan 4;481(7381):389-93. PMID: 22217954	SC-543; Santa Cruz
GSM631484	Cell line MCF-7	ESR1	GSE25710	Hurtado, A., et al. (2011). "FOXA1 is a key determinant of estrogen receptor function and endocrine response." Nat Genet 43(1): 27-33.	SC-543; Santa Cruz
GSM1967545	Cell line MCF-7	ESR1	GSE75779	Korkmaz, G., et al. (2016). "Functional genetic screens for enhancer elements in the human genome using CRISPR-Cas9." Nat Biotechnol 34(2): 192-198.	Not specified
GSM631485	Cell line ZR-75-1	ESR1	GSE25710	NA	Not specified
GSM631486	Cell line ZR-75-1	ESR1	GSE25710	NA	Not specified
