# Supplementary material for: Estrogen receptor 1 chromatin profiling in human breast tumors reveals high inter-patient heterogeneity with enrichment of risk SNPs and enhancer activity at most-conserved regions
Source: HighWire-hosted journal article supplement (doi:10.1101/gr.278680.123), 2024-05-06
Supplement: Supplemental_Table_S2.xlsx [file Supplemental_Table_S2.xlsx]

## Sheet: Supplemental_Table_S2
Supplemental Table S2 | Ranking of all distal ESR1 peaks found in female patients
Peak_name	Chr	Start	End	Nb_patients	Strongest_ERE	ERE presence	Gene name_corces	SNP_name	SNP_Ref_Allel	SNP_Effect_allel	SNP_Beta	SEX
chr19:41426792-41427742	chr19	41426792	41427742	40	7.47934	Yes	CYP2B7P					FEMALE
chr8:129153956-129154764	chr8	129153956	129154764	40	10.3876	Yes						FEMALE
chr12:2904930-2905654	chr12	2904930	2905654	40	11.0633	Yes						FEMALE
chr17:38604784-38605541	chr17	38604784	38605541	40	11.6549	Yes	IGFBP4					FEMALE
chr17:38478156-38479134	chr17	38478156	38479134	40	12.2034	Yes	RARA					FEMALE
chr12:116828004-116828866	chr12	116828004	116828866	40	13.6933	Yes						FEMALE
chr3:50642350-50643689	chr3	50642350	50643689	40	13.7055	Yes	CYB561D2					FEMALE
chr17:55976934-55977672	chr17	55976934	55977672	40	13.8774	Yes						FEMALE
chr19:38812102-38812747	chr19	38812102	38812747	39	8.5935	Yes						FEMALE
chr2:11638543-11639209	chr2	11638543	11639209	39	10.9757	Yes	GREB1					FEMALE
chr5:131714181-131714930	chr5	131714181	131714930	39	11.0295	Yes						FEMALE
chr16:85339619-85340215	chr16	85339619	85340215	39	11.1306	Yes						FEMALE
chr2:227015691-227016375	chr2	227015691	227016375	39	11.4784	Yes						FEMALE
chr8:103612914-103613864	chr8	103612914	103613864	39	12.4596	Yes						FEMALE
chr17:43978356-43978982	chr17	43978356	43978982	39	12.7471	Yes	MAPT					FEMALE
chr8:37002206-37002949	chr8	37002206	37002949	39	13.1661	Yes						FEMALE
chr15:39960532-39961199	chr15	39960532	39961199	39	13.5857	Yes						FEMALE
chr5:154448034-154448778	chr5	154448034	154448778	39	14.2245	Yes						FEMALE
chr3:188816623-188817400	chr3	188816623	188817400	39	14.401	Yes						FEMALE
chr2:238467516-238468232	chr2	238467516	238468232	38	7.57991	Yes	PRLH					FEMALE
chr16:9141325-9142077	chr16	9141325	9142077	38	9.73364	Yes						FEMALE
chr2:216847159-216847871	chr2	216847159	216847871	38	10.1688	Yes						FEMALE
chr16:4202125-4202831	chr16	4202125	4202831	38	10.895	Yes						FEMALE
chr18:24325210-24325950	chr18	24325210	24325950	38	11.1555	Yes						FEMALE
chr10:127313221-127313921	chr10	127313221	127313921	38	11.6022	Yes						FEMALE
chr8:67434456-67435209	chr8	67434456	67435209	38	11.7273	Yes						FEMALE
chr22:29913241-29913964	chr22	29913241	29913964	38	11.7571	Yes						FEMALE
chr11:101312337-101313053	chr11	101312337	101313053	38	12.1723	Yes	PGR					FEMALE
chrX:16680294-16681003	chrX	16680294	16681003	38	12.391	Yes						FEMALE
chr17:38738384-38739106	chr17	38738384	38739106	38	12.6643	Yes						FEMALE
chr16:14463954-14464675	chr16	14463954	14464675	38	13.5857	Yes						FEMALE
chr1:41389108-41389863	chr1	41389108	41389863	38	13.5993	Yes						FEMALE
chr1:154162863-154163558	chr1	154162863	154163558	38	13.747	Yes						FEMALE
chr8:116879372-116880249	chr8	116879372	116880249	38	14.2245	Yes						FEMALE
chr16:85499445-85500116	chr16	85499445	85500116	37	6.7758	Yes						FEMALE
chr15:71388849-71389547	chr15	71388849	71389547	37	6.81092	Yes						FEMALE
chr21:16582423-16583050	chr21	16582423	16583050	37	8.83893	Yes		rs2823144:16582933:C:G	C	G	-0.0546	FEMALE
chr21:36106880-36107530	chr21	36106880	36107530	37	9.06073	Yes						FEMALE
chr9:130784334-130784996	chr9	130784334	130784996	37	9.48305	Yes	FAM102A					FEMALE
chr17:39692093-39692732	chr17	39692093	39692732	37	9.64733	Yes						FEMALE
chr1:209719600-209720295	chr1	209719600	209720295	37	10.7767	Yes						FEMALE
chr12:124877382-124878080	chr12	124877382	124878080	37	11.1279	Yes						FEMALE
chr15:74002299-74003082	chr15	74002299	74003082	37	11.9084	Yes						FEMALE
chr2:238143859-238144519	chr2	238143859	238144519	37	12.0682	Yes	MLPH					FEMALE
chr9:138284229-138284906	chr9	138284229	138284906	37	12.0682	Yes						FEMALE
chr14:93483580-93484249	chr14	93483580	93484249	37	12.1749	Yes	ITPK1					FEMALE
chr12:89858554-89859296	chr12	89858554	89859296	37	12.4322	Yes						FEMALE
chr9:95380829-95381496	chr9	95380829	95381496	37	13.1214	Yes	SUSD3					FEMALE
chr3:150474100-150474925	chr3	150474100	150474925	37	13.7055	Yes						FEMALE
chr2:70843243-70843921	chr2	70843243	70843921	37	13.7646	Yes						FEMALE
chr2:45979559-45980220	chr2	45979559	45980220	37	14.2389	Yes						FEMALE
chr2:130997066-130997732	chr2	130997066	130997732	37	14.2389	Yes	TUBA3E					FEMALE
chr12:124853837-124854949	chr12	124853837	124854949	36	6.47363	Yes						FEMALE
chr1:7507757-7508450	chr1	7507757	7508450	36	6.87228	Yes						FEMALE
chr11:17427147-17427803	chr11	17427147	17427803	36	6.92607	Yes						FEMALE
chr8:128882514-128883331	chr8	128882514	128883331	36	8.35176	Yes	CASC8					FEMALE
chr2:190406048-190406821	chr2	190406048	190406821	36	9.21303	Yes						FEMALE
chr3:13517481-13518191	chr3	13517481	13518191	36	9.57378	Yes	HDAC11					FEMALE
chr19:4976251-4976967	chr19	4976251	4976967	36	10.1495	Yes	KDM4B					FEMALE
chr10:95194714-95195369	chr10	95194714	95195369	36	10.196	Yes						FEMALE
chr19:4970678-4971436	chr19	4970678	4971436	36	10.8536	Yes	KDM4B					FEMALE
chr6:157148296-157148911	chr6	157148296	157148911	36	11.5763	Yes						FEMALE
chr19:16574628-16575292	chr19	16574628	16575292	36	11.9853	Yes	EPS15L1					FEMALE
chr14:67946646-67947270	chr14	67946646	67947270	36	12.1428	Yes	TMEM229B					FEMALE
chr4:3113123-3113764	chr4	3113123	3113764	36	12.4983	Yes						FEMALE
chr12:116307804-116308482	chr12	116307804	116308482	36	12.9871	Yes						FEMALE
chr1:31841463-31842157	chr1	31841463	31842157	36	13.2135	Yes						FEMALE
chr11:70651847-70652547	chr11	70651847	70652547	36	13.2191	Yes						FEMALE
chr2:65527151-65527832	chr2	65527151	65527832	36	13.6137	Yes						FEMALE
chr3:72220950-72221679	chr3	72220950	72221679	36	13.7646	Yes						FEMALE
chr1:1008950-1009808	chr1	1008950	1009808	36	14.2245	Yes	RNF223					FEMALE
chr17:49021551-49022354	chr17	49021551	49022354	35	6.17721	Yes	SPATA20					FEMALE
chr20:46786656-46787273	chr20	46786656	46787273	35	6.22551	Yes						FEMALE
chr22:46887737-46888354	chr22	46887737	46888354	35	6.25047	Yes						FEMALE
chr16:83980383-83980994	chr16	83980383	83980994	35	6.50486	Yes						FEMALE
chr19:1181509-1182218	chr19	1181509	1182218	35	7.25851	Yes						FEMALE
chr2:100252991-100253632	chr2	100252991	100253632	35	8.24669	Yes	AC092667.2					FEMALE
chr1:30934386-30935038	chr1	30934386	30935038	35	8.34595	Yes						FEMALE
chr6:135532211-135532846	chr6	135532211	135532846	35	9.15185	Yes						FEMALE
chr20:43393926-43394915	chr20	43393926	43394915	35	10.5345	Yes	KCNK15					FEMALE
chr19:35808228-35808920	chr19	35808228	35808920	35	10.7337	Yes						FEMALE
chr22:37966091-37966805	chr22	37966091	37966805	35	10.7934	Yes						FEMALE
chr10:106240551-106241170	chr10	106240551	106241170	35	11.1013	Yes						FEMALE
chr1:203058244-203059055	chr1	203058244	203059055	35	11.4556	Yes						FEMALE
chr19:3389867-3390509	chr19	3389867	3390509	35	11.9039	Yes						FEMALE
chr1:207076800-207077457	chr1	207076800	207077457	35	11.9618	Yes	IL20					FEMALE
chr11:100904636-100905347	chr11	100904636	100905347	35	11.9739	Yes	RP11-788M5.3					FEMALE
chr10:482015-482657	chr10	482015	482657	35	12.3302	Yes						FEMALE
chr21:38936923-38937580	chr21	38936923	38937580	35	13.0222	Yes						FEMALE
chr18:74398650-74399350	chr18	74398650	74399350	35	13.3115	Yes						FEMALE
chr17:40779996-40780684	chr17	40779996	40780684	35	13.4555	Yes	COA3					FEMALE
chr1:184595650-184596363	chr1	184595650	184596363	35	13.4623	Yes						FEMALE
chr20:35215476-35216211	chr20	35215476	35216211	35	14.2245	Yes						FEMALE
chr5:173910283-173910934	chr5	173910283	173910934	35	14.2245	Yes						FEMALE
chr17:72754238-72755106	chr17	72754238	72755106	34	5.82897	Yes	HID1					FEMALE
chr17:72756654-72757356	chr17	72756654	72757356	34	6.01947	Yes	HID1					FEMALE
chr12:116933004-116933610	chr12	116933004	116933610	34	6.03134	Yes						FEMALE
chr19:1166709-1167347	chr19	1166709	1167347	34	7.02219	Yes	UQCR11					FEMALE
chr21:36100630-36101373	chr21	36100630	36101373	34	7.44328	Yes						FEMALE
chr10:5701770-5702628	chr10	5701770	5702628	34	8.67516	Yes						FEMALE
chr1:235098813-235099586	chr1	235098813	235099586	34	8.69434	Yes						FEMALE
chr20:47480940-47481823	chr20	47480940	47481823	34	9.12224	Yes	PREX1					FEMALE
chr22:29209566-29210282	chr22	29209566	29210282	34	9.2225	Yes		rs28448648:29210154:G:C	G	C	0.1552	FEMALE
chr4:139831820-139832538	chr4	139831820	139832538	34	9.37154	Yes						FEMALE
chr10:6339764-6340449	chr10	6339764	6340449	34	9.57276	Yes						FEMALE
chr6:30719222-30719886	chr6	30719222	30719886	34	10.0062	Yes						FEMALE
chr1:162129100-162129750	chr1	162129100	162129750	34	10.0213	Yes						FEMALE
chr2:215243216-215244069	chr2	215243216	215244069	34	10.1126	Yes						FEMALE
chr1:21594786-21595488	chr1	21594786	21595488	34	10.7825	Yes						FEMALE
chr10:79631907-79632597	chr10	79631907	79632597	34	10.9132	Yes						FEMALE
chr10:112582271-112583008	chr10	112582271	112583008	34	11.6444	Yes						FEMALE
chr3:58452742-58453401	chr3	58452742	58453401	34	11.9588	Yes						FEMALE
chr12:69833809-69834480	chr12	69833809	69834480	34	11.9618	Yes						FEMALE
chr12:834160-834767	chr12	834160	834767	34	12.4323	Yes						FEMALE
chr10:12192101-12192764	chr10	12192101	12192764	34	13.5486	Yes						FEMALE
chr17:56716898-56717541	chr17	56716898	56717541	34	13.7055	Yes						FEMALE
chr1:114519100-114519763	chr1	114519100	114519763	34	14.2245	Yes						FEMALE
chr22:43130288-43130941	chr22	43130288	43130941	34	14.2245	Yes						FEMALE
chr5:133801958-133802634	chr5	133801958	133802634	33	6.34426	Yes	AC005355.2					FEMALE
chr11:1817647-1818358	chr11	1817647	1818358	33	7.39056	Yes						FEMALE
chr11:75044700-75045300	chr11	75044700	75045300	33	7.42757	Yes						FEMALE
chr11:77970949-77971642	chr11	77970949	77971642	33	7.83576	Yes						FEMALE
chr5:55325578-55326280	chr5	55325578	55326280	33	7.92526	Yes						FEMALE
chr8:69766544-69767172	chr8	69766544	69767172	33	9.06073	Yes						FEMALE
chr4:3829187-3829923	chr4	3829187	3829923	33	9.17254	Yes	FAM86EP					FEMALE
chr19:45244978-45245771	chr19	45244978	45245771	33	10.105	Yes						FEMALE
chr11:72497349-72498000	chr11	72497349	72498000	33	10.2126	Yes						FEMALE
chr2:1679921-1680609	chr2	1679921	1680609	33	10.413	Yes						FEMALE
chr20:20421815-20422419	chr20	20421815	20422419	33	10.7603	Yes						FEMALE
chr8:117010355-117011122	chr8	117010355	117011122	33	11.0069	Yes						FEMALE
chr9:114774296-114774939	chr9	114774296	114774939	33	11.0515	Yes						FEMALE
chr11:69329959-69330609	chr11	69329959	69330609	33	11.0634	Yes	AP000439.3	rs640822:69330090:C:T	C	T	-0.0859	FEMALE
chr5:78489381-78490080	chr5	78489381	78490080	33	11.1101	Yes						FEMALE
chr1:42331807-42332486	chr1	42331807	42332486	33	11.1382	Yes						FEMALE
chr8:100917226-100918194	chr8	100917226	100918194	33	11.5245	Yes						FEMALE
chr15:63679842-63680496	chr15	63679842	63680496	33	11.5403	Yes	CA12					FEMALE
chr14:94801049-94801699	chr14	94801049	94801699	33	11.7037	Yes						FEMALE
chr5:55724866-55725508	chr5	55724866	55725508	33	11.7318	Yes						FEMALE
chr19:39204988-39205597	chr19	39204988	39205597	33	11.793	Yes						FEMALE
chr9:33221150-33221783	chr9	33221150	33221783	33	12.1749	Yes	SPINK4					FEMALE
chr8:22596399-22597160	chr8	22596399	22597160	33	12.2015	Yes	RP11-459E5.1					FEMALE
chr2:212287675-212288366	chr2	212287675	212288366	33	12.2876	Yes						FEMALE
chr14:74223157-74223812	chr14	74223157	74223812	33	12.4366	Yes	ACOT4					FEMALE
chr3:156260050-156260879	chr3	156260050	156260879	33	12.4696	Yes						FEMALE
chr1:12660244-12660962	chr1	12660244	12660962	33	12.8599	Yes						FEMALE
chr3:43255929-43256637	chr3	43255929	43256637	33	12.9672	Yes						FEMALE
chr5:132584958-132585631	chr5	132584958	132585631	33	13.1603	Yes						FEMALE
chr10:62608008-62608851	chr10	62608008	62608851	33	13.2312	Yes						FEMALE
chr10:6195101-6195764	chr10	6195101	6195764	33	13.5546	Yes						FEMALE
chr15:31733082-31733716	chr15	31733082	31733716	33	13.7221	Yes						FEMALE
chr12:124844193-124845237	chr12	124844193	124845237	32	3.25399	Yes						FEMALE
chr15:89664546-89665152	chr15	89664546	89665152	32	5.92835	Yes	RLBP1					FEMALE
chr22:38618654-38619432	chr22	38618654	38619432	32	6.10496	Yes						FEMALE
chr14:95102906-95103600	chr14	95102906	95103600	32	6.10574	Yes	SERPINA5					FEMALE
chr15:69886596-69887347	chr15	69886596	69887347	32	6.34621	Yes						FEMALE
chr6:36086072-36086711	chr6	36086072	36086711	32	6.59232	Yes						FEMALE
chr17:80061672-80062356	chr17	80061672	80062356	32	7.72631	Yes	ANAPC11					FEMALE
chr17:80846794-80847956	chr17	80846794	80847956	32	7.74498	Yes						FEMALE
chr19:1169966-1170771	chr19	1169966	1170771	32	8.03495	Yes						FEMALE
chr7:906578-907422	chr7	906578	907422	32	8.77628	Yes						FEMALE
chr1:211694700-211695307	chr1	211694700	211695307	32	9.16656	Yes						FEMALE
chr16:23335927-23336551	chr16	23335927	23336551	32	9.21897	Yes						FEMALE
chr3:71159889-71160568	chr3	71159889	71160568	32	10.1245	Yes						FEMALE
chr9:4866246-4866870	chr9	4866246	4866870	32	10.3166	Yes						FEMALE
chr8:102478844-102479435	chr8	102478844	102479435	32	10.896	Yes		rs514192:102478959:A:T	A	T	-0.0448	FEMALE
chr3:197079800-197080478	chr3	197079800	197080478	32	13.0681	Yes						FEMALE
chr2:177710316-177711021	chr2	177710316	177711021	32	13.2312	Yes						FEMALE
chr8:102527549-102528255	chr8	102527549	102528255	32	13.2789	Yes						FEMALE
chr2:1696240-1696859	chr2	1696240	1696859	32	13.6137	Yes						FEMALE
chr9:131955815-131956579	chr9	131955815	131956579	32	13.8979	Yes						FEMALE
chr10:120384920-120385614	chr10	120384920	120385614	32	13.9115	Yes						FEMALE
chr8:33102445-33103172	chr8	33102445	33103172	32	14.395	Yes						FEMALE
chr15:70754986-70755847	chr15	70754986	70755847	31	3.05575	Yes	TLE3					FEMALE
chr11:12269896-12270542	chr11	12269896	12270542	31	4.08946	Yes						FEMALE
chr22:25796672-25797382	chr22	25796672	25797382	31	4.48454	Yes						FEMALE
chr4:77491187-77491791	chr4	77491187	77491791	31	5.69417	Yes						FEMALE
chr3:176671365-176672081	chr3	176671365	176672081	31	6.07785	Yes						FEMALE
chr3:150454913-150455581	chr3	150454913	150455581	31	6.50416	Yes						FEMALE
chr16:1428801-1429677	chr16	1428801	1429677	31	6.65743	Yes						FEMALE
chr14:50459436-50460149	chr14	50459436	50460149	31	7.2481	Yes						FEMALE
chr19:4991553-4992397	chr19	4991553	4992397	31	7.30372	Yes	KDM4B					FEMALE
chr13:98945314-98946003	chr13	98945314	98946003	31	7.52452	Yes						FEMALE
chr19:7683931-7685338	chr19	7683931	7685338	31	7.53088	Yes						FEMALE
chr20:47314311-47315152	chr20	47314311	47315152	31	8.02077	Yes						FEMALE
chr11:65185914-65186716	chr11	65185914	65186716	31	8.18942	Yes						FEMALE
chr14:104159699-104160339	chr14	104159699	104160339	31	8.51556	Yes						FEMALE
chr17:38336856-38337478	chr17	38336856	38337478	31	8.69439	Yes	RAPGEFL1					FEMALE
chr10:79649058-79649625	chr10	79649058	79649625	31	8.82993	Yes						FEMALE
chr21:43796350-43796900	chr21	43796350	43796900	31	9.84005	Yes	TFF1					FEMALE
chr9:130809415-130810031	chr9	130809415	130810031	31	9.87654	Yes	FAM102A					FEMALE
chr6:38229357-38230131	chr6	38229357	38230131	31	10.1192	Yes						FEMALE
chr13:34216709-34217415	chr13	34216709	34217415	31	10.1219	Yes						FEMALE
chr7:27317131-27317770	chr7	27317131	27317770	31	10.3777	Yes						FEMALE
chrX:139574334-139574934	chrX	139574334	139574934	31	10.5064	Yes						FEMALE
chr15:75109587-75110246	chr15	75109587	75110246	31	10.8854	Yes						FEMALE
chr18:20451550-20452239	chr18	20451550	20452239	31	11.1101	Yes						FEMALE
chr10:117424064-117424721	chr10	117424064	117424721	31	11.6847	Yes						FEMALE
chr1:37504048-37504757	chr1	37504048	37504757	31	11.9897	Yes	GRIK3					FEMALE
chr10:80888214-80889015	chr10	80888214	80889015	31	12.4178	Yes		10:80888588:A:AAAAAG	A	AAAAAG	0.0768	FEMALE
chr1:234859648-234861000	chr1	234859648	234861000	31	12.4838	Yes						FEMALE
chr4:89255963-89256692	chr4	89255963	89256692	31	12.7697	Yes						FEMALE
chr15:71396897-71397587	chr15	71396897	71397587	31	13.5857	Yes	CT62					FEMALE
chr9:117670308-117670954	chr9	117670308	117670954	30	3.09402	Yes						FEMALE
chr11:35387363-35387997	chr11	35387363	35387997	30	4.16129	Yes						FEMALE
chr10:128606764-128607501	chr10	128606764	128607501	30	4.16357	Yes						FEMALE
chr8:128812922-128813501	chr8	128812922	128813501	30	4.21621	Yes						FEMALE
chr22:41128610-41129210	chr22	41128610	41129210	30	4.98791	Yes						FEMALE
chr4:782573-783229	chr4	782573	783229	30	5.19254	Yes	CPLX1					FEMALE
chr6:42090346-42090946	chr6	42090346	42090946	30	5.40676	Yes						FEMALE
chr22:30694182-30694817	chr22	30694182	30694817	30	5.62985	Yes						FEMALE
chr3:153936415-153937015	chr3	153936415	153937015	30	7.04486	Yes						FEMALE
chr12:2041330-2041923	chr12	2041330	2041923	30	7.10169	Yes						FEMALE
chr12:6472821-6473559	chr12	6472821	6473559	30	7.85539	Yes						FEMALE
chr1:32308357-32309000	chr1	32308357	32309000	30	7.8977	Yes						FEMALE
chr19:38789563-38790286	chr19	38789563	38790286	30	8.20141	Yes						FEMALE
chr7:75936190-75936836	chr7	75936190	75936836	30	8.35244	Yes	HSPB1					FEMALE
chr16:377037-377849	chr16	377037	377849	30	8.66139	Yes						FEMALE
chr15:90371081-90372152	chr15	90371081	90372152	30	9.10266	Yes						FEMALE
chr1:36795200-36795857	chr1	36795200	36795857	30	9.51013	Yes	EVA1B					FEMALE
chr1:85763363-85764194	chr1	85763363	85764194	30	9.87254	Yes						FEMALE
chr6:44077954-44078562	chr6	44077954	44078562	30	10.2969	Yes						FEMALE
chr5:131590178-131590808	chr5	131590178	131590808	30	10.4193	Yes						FEMALE
chr14:91742682-91743396	chr14	91742682	91743396	30	10.6213	Yes	CTD-2547L24.4	rs7153397:91742924:C:T	C	T	0.0536	FEMALE
chr6:83279622-83280246	chr6	83279622	83280246	30	10.7165	Yes						FEMALE
chr5:10954680-10955384	chr5	10954680	10955384	30	10.7941	Yes						FEMALE
chr2:178249843-178250516	chr2	178249843	178250516	30	11.0667	Yes						FEMALE
chr3:168608621-168609239	chr3	168608621	168609239	30	11.1665	Yes						FEMALE
chr20:46540689-46541323	chr20	46540689	46541323	30	11.4401	Yes						FEMALE
chr15:99292281-99292997	chr15	99292281	99292997	30	11.4489	Yes						FEMALE
chr16:8772919-8773621	chr16	8772919	8773621	30	11.7116	Yes	ABAT					FEMALE
chr17:1848887-1849745	chr17	1848887	1849745	30	12.2832	Yes						FEMALE
chr2:226707675-226708393	chr2	226707675	226708393	30	12.4659	Yes						FEMALE
chr5:105577140-105577732	chr5	105577140	105577732	30	12.7191	Yes						FEMALE
chr8:98776331-98777031	chr8	98776331	98777031	30	12.7191	Yes						FEMALE
chr1:85225357-85225888	chr1	85225357	85225888	30	12.8713	Yes						FEMALE
chr7:17595728-17596428	chr7	17595728	17596428	30	12.9379	Yes						FEMALE
chr1:10812370-10813000	chr1	10812370	10813000	30	13.5117	Yes						FEMALE
chr7:4722886-4723569	chr7	4722886	4723569	30	13.5424	Yes						FEMALE
chr2:217957166-217957882	chr2	217957166	217957882	30	14.5283	Yes		rs199804270:217957405:GA:G	GA	G	-0.2572	FEMALE
chr2:55390809-55391468	chr2	55390809	55391468	29	3.19693	Yes						FEMALE
chr8:128680722-128681452	chr8	128680722	128681452	29	3.43726	Yes						FEMALE
chr7:45582972-45583623	chr7	45582972	45583623	29	3.62137	Yes						FEMALE
chr8:129165210-129165772	chr8	129165210	129165772	29	5.13026	Yes		rs759646:129165269:G:A	G	A	0.0438	FEMALE
chr10:43521651-43522358	chr10	43521651	43522358	29	6.00131	Yes						FEMALE
chr18:37103124-37103850	chr18	37103124	37103850	29	6.63793	Yes						FEMALE
chr19:35531742-35532400	chr19	35531742	35532400	29	7.30801	Yes	HPN					FEMALE
chr2:218252595-218253232	chr2	218252595	218253232	29	7.63077	Yes		rs78040234:218253049:A:T	A	T	0.085	FEMALE
chr1:16934707-16935386	chr1	16934707	16935386	29	7.83396	Yes						FEMALE
chr2:28600019-28601182	chr2	28600019	28601182	29	8.73076	Yes						FEMALE
chr18:76822741-76823311	chr18	76822741	76823311	29	9.98442	Yes						FEMALE
chr11:101169703-101170447	chr11	101169703	101170447	29	11.1703	Yes						FEMALE
chr15:92731209-92731913	chr15	92731209	92731913	29	11.6296	Yes						FEMALE
chr1:75118128-75118757	chr1	75118128	75118757	29	11.7454	Yes						FEMALE
chr2:106139080-106139760	chr2	106139080	106139760	29	11.942	Yes						FEMALE
chr13:99710753-99711303	chr13	99710753	99711303	29	11.9588	Yes						FEMALE
chr12:15369154-15369937	chr12	15369154	15369937	29	11.9705	Yes						FEMALE
chr1:225091398-225092140	chr1	225091398	225092140	29	12.3731	Yes						FEMALE
chr8:121085322-121086044	chr8	121085322	121086044	29	12.4642	Yes						FEMALE
chr15:64188881-64189567	chr15	64188881	64189567	29	12.4703	Yes						FEMALE
chr17:78020922-78021532	chr17	78020922	78021532	29	12.5962	Yes						FEMALE
chr6:20210325-20210947	chr6	20210325	20210947	29	13.0121	Yes						FEMALE
chr2:134250343-134251009	chr2	134250343	134251009	29	13.0501	Yes						FEMALE
chr1:61681200-61681888	chr1	61681200	61681888	29	13.2863	Yes						FEMALE
chr2:173138675-173139359	chr2	173138675	173139359	29	14.082	Yes						FEMALE
chr19:50073678-50074341	chr19	50073678	50074341	29	14.8693	Yes						FEMALE
chr19:40755336-40756192	chr19	40755336	40756192	28	3.72542	Yes						FEMALE
chr21:44762783-44763452	chr21	44762783	44763452	28	4.15378	Yes						FEMALE
chr16:10688326-10688949	chr16	10688326	10688949	28	4.86042	Yes						FEMALE
chr6:21738612-21739496	chr6	21738612	21739496	28	5.21708	Yes						FEMALE
chr11:77867209-77867916	chr11	77867209	77867916	28	5.73797	Yes						FEMALE
chr19:3336613-3337412	chr19	3336613	3337412	28	5.78386	Yes						FEMALE
chr10:49495721-49496625	chr10	49495721	49496625	28	6.01311	Yes						FEMALE
chr12:54219009-54219630	chr12	54219009	54219630	28	6.16495	Yes	TARBP2					FEMALE
chr15:69774849-69775605	chr15	69774849	69775605	28	6.25112	Yes						FEMALE
chr16:31141999-31142739	chr16	31141999	31142739	28	6.32104	Yes						FEMALE
chr19:4061269-4062292	chr19	4061269	4062292	28	6.53463	Yes	ZBTB7A					FEMALE
chr10:115681583-115682220	chr10	115681583	115682220	28	6.63747	Yes						FEMALE
chr12:13024922-13025882	chr12	13024922	13025882	28	6.90449	Yes						FEMALE
chr3:193876615-193877241	chr3	193876615	193877241	28	7.1834	Yes						FEMALE
chr19:39900012-39900771	chr19	39900012	39900771	28	7.2142	Yes						FEMALE
chr16:70170449-70171125	chr16	70170449	70171125	28	7.33443	Yes						FEMALE
chr19:35809842-35810442	chr19	35809842	35810442	28	7.58806	Yes						FEMALE
chr1:201566886-201567650	chr1	201566886	201567650	28	7.86387	Yes						FEMALE
chr18:46547842-46548441	chr18	46547842	46548441	28	8.58459	Yes						FEMALE
chr1:201992050-201992714	chr1	201992050	201992714	28	8.69952	Yes						FEMALE
chr4:186434748-186435452	chr4	186434748	186435452	28	9.02011	Yes						FEMALE
chr1:22798988-22799632	chr1	22798988	22799632	28	9.24633	Yes						FEMALE
chr18:18909991-18910617	chr18	18909991	18910617	28	9.31446	Yes						FEMALE
chr17:80571767-80572482	chr17	80571767	80572482	28	9.68917	Yes						FEMALE
chr20:49343833-49344566	chr20	49343833	49344566	28	9.74563	Yes	BCAS4					FEMALE
chr1:113256007-113256607	chr1	113256007	113256607	28	9.75994	Yes	PPM1J					FEMALE
chr10:90234114-90234808	chr10	90234114	90234808	28	10.0806	Yes						FEMALE
chr17:39571956-39572722	chr17	39571956	39572722	28	10.4217	Yes	KRT37					FEMALE
chr3:14454315-14454941	chr3	14454315	14454941	28	10.5345	Yes						FEMALE
chr14:59827848-59828500	chr14	59827848	59828500	28	10.6304	Yes						FEMALE
chr16:501375-502054	chr16	501375	502054	28	10.9158	Yes	JMJD8					FEMALE
chr5:116194418-116195094	chr5	116194418	116195094	28	11.2922	Yes						FEMALE
chr6:151937229-151937846	chr6	151937229	151937846	28	11.3187	Yes						FEMALE
chr17:54251122-54251778	chr17	54251122	54251778	28	11.5202	Yes						FEMALE
chr12:75265467-75266137	chr12	75265467	75266137	28	12.1752	Yes						FEMALE
chr13:29017014-29017759	chr13	29017014	29017759	28	12.2552	Yes						FEMALE
chr9:91144779-91145479	chr9	91144779	91145479	28	12.5791	Yes	NXNL2					FEMALE
chr4:99538923-99539541	chr4	99538923	99539541	28	13.0222	Yes						FEMALE
chr4:84572491-84573189	chr4	84572491	84573189	28	13.2744	Yes						FEMALE
chr2:171095116-171095743	chr2	171095116	171095743	28	13.5008	Yes						FEMALE
chr10:129127214-129127864	chr10	129127214	129127864	28	13.7221	Yes	FAM196A					FEMALE
chr16:49044136-49044819	chr16	49044136	49044819	28	13.8979	Yes						FEMALE
chr12:125322630-125323310	chr12	125322630	125323310	27	2.84166	Yes						FEMALE
chr12:124866196-124866930	chr12	124866196	124866930	27	3.14536	Yes						FEMALE
chr16:2769049-2769753	chr16	2769049	2769753	27	4.3617	Yes						FEMALE
chr1:201987632-201988386	chr1	201987632	201988386	27	4.62597	Yes						FEMALE
chr10:8767913-8768564	chr10	8767913	8768564	27	4.73582	Yes						FEMALE
chr2:101736915-101737518	chr2	101736915	101737518	27	4.76207	Yes						FEMALE
chr19:1261953-1262774	chr19	1261953	1262774	27	5.03863	Yes						FEMALE
chr2:237733409-237734019	chr2	237733409	237734019	27	5.04664	Yes						FEMALE
chr10:61082756-61083373	chr10	61082756	61083373	27	5.24838	Yes						FEMALE
chr3:159659315-159659865	chr3	159659315	159659865	27	5.82984	Yes						FEMALE
chr10:80853551-80854258	chr10	80853551	80854258	27	5.86402	Yes		rs753271:80853575:A:G	A	G	-0.0564	FEMALE
chr14:35872826-35873539	chr14	35872826	35873539	27	6.16223	Yes						FEMALE
chr17:64948084-64948782	chr17	64948084	64948782	27	6.16504	Yes						FEMALE
chr16:4418849-4419549	chr16	4418849	4419549	27	6.5318	Yes						FEMALE
chr15:40627096-40627713	chr15	40627096	40627713	27	6.71022	Yes						FEMALE
chr15:64237796-64238446	chr15	64237796	64238446	27	6.93619	Yes						FEMALE
chr6:149401129-149401811	chr6	149401129	149401811	27	7.19144	Yes						FEMALE
chr5:71044178-71044778	chr5	71044178	71044778	27	7.52638	Yes						FEMALE
chr11:1507097-1507716	chr11	1507097	1507716	27	7.73487	Yes						FEMALE
chr1:172715400-172716107	chr1	172715400	172716107	27	8.08583	Yes						FEMALE
chr5:66531431-66532031	chr5	66531431	66532031	27	8.37468	Yes						FEMALE
chr19:2579012-2579697	chr19	2579012	2579697	27	8.39119	Yes						FEMALE
chr10:44668775-44669507	chr10	44668775	44669507	27	8.70184	Yes						FEMALE
chr10:124987158-124987813	chr10	124987158	124987813	27	8.71632	Yes	ACADSB					FEMALE
chr9:130717658-130718412	chr9	130717658	130718412	27	8.92986	Yes						FEMALE
chr16:53133322-53134069	chr16	53133322	53134069	27	9.09114	Yes						FEMALE
chr3:50164396-50165195	chr3	50164396	50165195	27	9.19716	Yes	CISH					FEMALE
chr1:202101457-202102131	chr1	202101457	202102131	27	9.52288	Yes						FEMALE
chr14:65584982-65585649	chr14	65584982	65585649	27	9.59336	Yes						FEMALE
chr20:48901089-48901739	chr20	48901089	48901739	27	9.6173	Yes						FEMALE
chr4:141171246-141171841	chr4	141171246	141171841	27	9.71539	Yes						FEMALE
chr9:126089983-126090596	chr9	126089983	126090596	27	10.0225	Yes						FEMALE
chr17:5216982-5217609	chr17	5216982	5217609	27	10.1737	Yes	RABEP1					FEMALE
chr8:96705372-96706028	chr8	96705372	96706028	27	10.2762	Yes						FEMALE
chrX:119619600-119620293	chrX	119619600	119620293	27	10.4294	Yes						FEMALE
chr6:109028529-109029250	chr6	109028529	109029250	27	10.4805	Yes						FEMALE
chr17:63190754-63191312	chr17	63190754	63191312	27	10.4989	Yes						FEMALE
chr8:29437210-29437803	chr8	29437210	29437803	27	10.6416	Yes						FEMALE
chr14:93511382-93511982	chr14	93511382	93511982	27	11.0987	Yes	ITPK1					FEMALE
chr2:159967809-159968540	chr2	159967809	159968540	27	11.7747	Yes						FEMALE
chr1:51786968-51787700	chr1	51786968	51787700	27	12.2613	Yes	TTC39A					FEMALE
chr6:167533686-167534400	chr6	167533686	167534400	27	12.3731	Yes						FEMALE
chr17:47964441-47965356	chr17	47964441	47965356	27	12.4702	Yes						FEMALE
chr10:112867464-112868171	chr10	112867464	112868171	27	12.7471	Yes						FEMALE
chr12:23378610-23379287	chr12	23378610	23379287	27	12.804	Yes						FEMALE
chr16:803384-803939	chr16	803384	803939	27	12.8921	Yes						FEMALE
chr4:173883763-173884587	chr4	173883763	173884587	27	13.4372	Yes						FEMALE
chr2:226480109-226480695	chr2	226480109	226480695	27	13.4579	Yes						FEMALE
chr2:35522430-35522960	chr2	35522430	35522960	27	13.9115	Yes						FEMALE
chr18:20837541-20838300	chr18	20837541	20838300	27	14.082	Yes						FEMALE
chr17:25574284-25574972	chr17	25574284	25574972	26	0	No						FEMALE
chrX:40377293-40377844	chrX	40377293	40377844	26	2.12502	Yes						FEMALE
chr15:62042485-62043202	chr15	62042485	62043202	26	2.84943	Yes						FEMALE
chr3:72677215-72677749	chr3	72677215	72677749	26	2.86999	Yes						FEMALE
chr19:41402992-41403597	chr19	41402992	41403597	26	3.0782	Yes	CYP2B7P					FEMALE
chr10:65390214-65390963	chr10	65390214	65390963	26	3.49445	Yes						FEMALE
chr16:85355398-85356005	chr16	85355398	85356005	26	3.51021	Yes						FEMALE
chr21:37560350-37561047	chr21	37560350	37561047	26	4.10844	Yes						FEMALE
chr3:58088629-58089289	chr3	58088629	58089289	26	4.6526	Yes						FEMALE
chr8:37455958-37456626	chr8	37455958	37456626	26	4.93492	Yes	RP11-150O12.3					FEMALE
chr19:16320992-16321547	chr19	16320992	16321547	26	5.29605	Yes						FEMALE
chr1:1014748-1015336	chr1	1014748	1015336	26	5.57647	Yes						FEMALE
chr9:86046690-86047583	chr9	86046690	86047583	26	5.58933	Yes						FEMALE
chr1:21578307-21579036	chr1	21578307	21579036	26	5.97669	Yes						FEMALE
chr5:139088508-139089232	chr5	139088508	139089232	26	6.97588	Yes	CXXC5					FEMALE
chr5:33549978-33550631	chr5	33549978	33550631	26	7.17875	Yes						FEMALE
chr2:26995168-26995949	chr2	26995168	26995949	26	7.35645	Yes						FEMALE
chrX:100000684-100001501	chrX	100000684	100001501	26	7.49758	Yes	SYTL4					FEMALE
chr14:69036560-69037199	chr14	69036560	69037199	26	7.52613	Yes						FEMALE
chr17:990756-991382	chr17	990756	991382	26	7.73258	Yes						FEMALE
chr17:61512684-61513456	chr17	61512684	61513456	26	8.0228	Yes						FEMALE
chr17:3879832-3880509	chr17	3879832	3880509	26	8.1736	Yes						FEMALE
chr22:39688588-39689260	chr22	39688588	39689260	26	8.90043	Yes						FEMALE
chr6:6759000-6759645	chr6	6759000	6759645	26	9.47042	Yes						FEMALE
chr6:15222007-15222611	chr6	15222007	15222611	26	9.92399	Yes						FEMALE
chr5:99983135-99983845	chr5	99983135	99983845	26	10.0603	Yes						FEMALE
chr12:3623360-3623980	chr12	3623360	3623980	26	10.25	Yes						FEMALE
chr2:26980759-26981359	chr2	26980759	26981359	26	10.3096	Yes						FEMALE
chr3:129690087-129690740	chr3	129690087	129690740	26	10.3125	Yes						FEMALE
chr2:71157659-71158295	chr2	71157659	71158295	26	10.324	Yes						FEMALE
chr19:24000384-24000997	chr19	24000384	24000997	26	10.4478	Yes						FEMALE
chr7:42871475-42872732	chr7	42871475	42872732	26	10.6599	Yes						FEMALE
chr14:105498534-105499225	chr14	105498534	105499225	26	10.689	Yes						FEMALE
chr2:64500643-64501382	chr2	64500643	64501382	26	10.6967	Yes						FEMALE
chr13:113567712-113568264	chr13	113567712	113568264	26	10.8399	Yes						FEMALE
chr8:11588062-11588645	chr8	11588062	11588645	26	11.059	Yes						FEMALE
chr20:19264069-19264676	chr20	19264069	19264676	26	11.4696	Yes						FEMALE
chr1:31659350-31660107	chr1	31659350	31660107	26	11.6599	Yes	NKAIN1					FEMALE
chr3:188891355-188891915	chr3	188891355	188891915	26	11.9636	Yes						FEMALE
chr20:45973839-45974426	chr20	45973839	45974426	26	12.0667	Yes						FEMALE
chr9:128213181-128213839	chr9	128213181	128213839	26	12.2036	Yes						FEMALE
chr20:16523069-16523652	chr20	16523069	16523652	26	12.2613	Yes						FEMALE
chr12:124850030-124850780	chr12	124850030	124850780	26	12.2758	Yes						FEMALE
chr14:100056849-100057399	chr14	100056849	100057399	26	12.379	Yes						FEMALE
chr17:26863696-26864394	chr17	26863696	26864394	26	12.4803	Yes						FEMALE
chr2:241009124-241009818	chr2	241009124	241009818	26	12.6362	Yes	MYEOV2					FEMALE
chr8:41416836-41417428	chr8	41416836	41417428	26	12.8161	Yes						FEMALE
chr7:101616246-101616796	chr7	101616246	101616796	26	12.8921	Yes						FEMALE
chr11:19817872-19818442	chr11	19817872	19818442	26	13.56	Yes						FEMALE
chr19:7968766-7969474	chr19	7968766	7969474	26	13.7574	Yes						FEMALE
chr10:17487306-17488220	chr10	17487306	17488220	26	13.873	Yes						FEMALE
chr1:109788748-109789357	chr1	109788748	109789357	26	14.0229	Yes						FEMALE
chr2:132191721-132192395	chr2	132191721	132192395	26	14.2389	Yes						FEMALE
chr1:11434313-11435013	chr1	11434313	11435013	26	14.5519	Yes						FEMALE
chr9:120162339-120162983	chr9	120162339	120162983	25	0	No						FEMALE
chr20:52765490-52766080	chr20	52765490	52766080	25	2.18493	Yes						FEMALE
chr4:141071791-141072698	chr4	141071791	141072698	25	3.67703	Yes						FEMALE
chr11:72905589-72906173	chr11	72905589	72906173	25	3.73462	Yes	P2RY2					FEMALE
chr8:66938622-66939272	chr8	66938622	66939272	25	4.03018	Yes						FEMALE
chr17:14109232-14109806	chr17	14109232	14109806	25	4.04745	Yes						FEMALE
chr8:59032310-59032922	chr8	59032310	59032922	25	4.60304	Yes						FEMALE
chr17:70679991-70680706	chr17	70679991	70680706	25	5.14765	Yes						FEMALE
chr8:134228587-134229272	chr8	134228587	134229272	25	5.21405	Yes						FEMALE
chr8:125212160-125212826	chr8	125212160	125212826	25	5.33845	Yes						FEMALE
chr20:56629712-56630547	chr20	56629712	56630547	25	5.40006	Yes						FEMALE
chr17:60882054-60882682	chr17	60882054	60882682	25	5.40565	Yes						FEMALE
chr9:92279665-92280296	chr9	92279665	92280296	25	5.75551	Yes						FEMALE
chr9:100908381-100909105	chr9	100908381	100909105	25	5.89828	Yes						FEMALE
chr10:65471806-65472558	chr10	65471806	65472558	25	5.99111	Yes						FEMALE
chr13:72287064-72287664	chr13	72287064	72287664	25	6.35145	Yes						FEMALE
chr13:110228465-110229130	chr13	110228465	110229130	25	6.51272	Yes						FEMALE
chr10:406621-407720	chr10	406621	407720	25	6.53886	Yes						FEMALE
chr17:38487945-38488958	chr17	38487945	38488958	25	6.57193	Yes	RARA					FEMALE
chr1:208649836-208650558	chr1	208649836	208650558	25	6.6263	Yes						FEMALE
chr8:128871872-128872594	chr8	128871872	128872594	25	6.6284	Yes						FEMALE
chr6:17389425-17390079	chr6	17389425	17390079	25	6.63497	Yes						FEMALE
chr22:50465936-50466830	chr22	50465936	50466830	25	6.72273	Yes						FEMALE
chr1:8319049-8320150	chr1	8319049	8320150	25	7.11966	Yes						FEMALE
chr22:50344732-50345454	chr22	50344732	50345454	25	7.16172	Yes						FEMALE
chr11:94578661-94579264	chr11	94578661	94579264	25	7.22917	Yes						FEMALE
chr22:19836132-19836866	chr22	19836132	19836866	25	7.4488	Yes						FEMALE
chr19:2168747-2169397	chr19	2168747	2169397	25	8.13767	Yes						FEMALE
chr11:46385046-46385679	chr11	46385046	46385679	25	8.5935	Yes						FEMALE
chr19:34120290-34121244	chr19	34120290	34121244	25	8.9652	Yes	CHST8					FEMALE
chr22:41868273-41868877	chr22	41868273	41868877	25	9.01497	Yes						FEMALE
chr3:77612129-77612709	chr3	77612129	77612709	25	9.11611	Yes						FEMALE
chr20:48853861-48854376	chr20	48853861	48854376	25	9.13265	Yes						FEMALE
chr6:34518522-34519125	chr6	34518522	34519125	25	9.37073	Yes	SPDEF					FEMALE
chr1:41365000-41365595	chr1	41365000	41365595	25	9.42626	Yes						FEMALE
chr15:62765002-62765646	chr15	62765002	62765646	25	9.46286	Yes						FEMALE
chr16:85554398-85555001	chr16	85554398	85555001	25	9.78983	Yes						FEMALE
chr8:36919621-36920222	chr8	36919621	36920222	25	9.84583	Yes						FEMALE
chr19:16114247-16114821	chr19	16114247	16114821	25	10.1241	Yes						FEMALE
chr12:122186599-122187268	chr12	122186599	122187268	25	10.2728	Yes						FEMALE
chr19:51547473-51548067	chr19	51547473	51548067	25	10.3301	Yes						FEMALE
chr9:92270883-92271446	chr9	92270883	92271446	25	10.4616	Yes						FEMALE
chr5:172899332-172900628	chr5	172899332	172900628	25	10.4808	Yes						FEMALE
chr10:1310950-1311520	chr10	1310950	1311520	25	10.728	Yes						FEMALE
chr11:129512947-129513597	chr11	129512947	129513597	25	10.8018	Yes						FEMALE
chr14:24134499-24135189	chr14	24134499	24135189	25	10.8955	Yes						FEMALE
chr16:67479151-67479799	chr16	67479151	67479799	25	10.964	Yes						FEMALE
chr4:1239091-1239723	chr4	1239091	1239723	25	11.0319	Yes						FEMALE
chr19:47880547-47881742	chr19	47880547	47881742	25	11.1022	Yes						FEMALE
chrX:39754344-39755043	chrX	39754344	39755043	25	11.1237	Yes						FEMALE
chr12:53551610-53552358	chr12	53551610	53552358	25	11.2704	Yes						FEMALE
chr4:169737723-169738579	chr4	169737723	169738579	25	11.631	Yes						FEMALE
chrX:152083844-152084494	chrX	152083844	152084494	25	11.9584	Yes						FEMALE
chrX:104217314-104217984	chrX	104217314	104217984	25	11.9648	Yes						FEMALE
chr2:44330743-44331275	chr2	44330743	44331275	25	11.9799	Yes						FEMALE
chr5:33537345-33537958	chr5	33537345	33537958	25	12.1187	Yes						FEMALE
chr7:105280228-105280846	chr7	105280228	105280846	25	12.3368	Yes						FEMALE
chr2:129039380-129039960	chr2	129039380	129039960	25	12.5902	Yes						FEMALE
chr22:39878757-39879260	chr22	39878757	39879260	25	12.7271	Yes						FEMALE
chr8:97957972-97958572	chr8	97957972	97958572	25	13.2312	Yes						FEMALE
chr1:175156113-175156800	chr1	175156113	175156800	25	13.6833	Yes						FEMALE
chr20:3049558-3050102	chr20	3049558	3050102	25	13.7646	Yes						FEMALE
chr1:12609544-12610184	chr1	12609544	12610184	25	13.9115	Yes						FEMALE
chr19:3713018-3713697	chr19	3713018	3713697	24	0	No						FEMALE
chr9:80278633-80279183	chr9	80278633	80279183	24	2.37929	Yes						FEMALE
chr1:182284250-182284900	chr1	182284250	182284900	24	2.43971	Yes						FEMALE
chr14:68925597-68926232	chr14	68925597	68926232	24	2.76876	Yes						FEMALE
chr12:113679809-113680380	chr12	113679809	113680380	24	3.56908	Yes						FEMALE
chr7:120314073-120314637	chr7	120314073	120314637	24	4.33968	Yes						FEMALE
chr19:3710288-3710897	chr19	3710288	3710897	24	4.38307	Yes						FEMALE
chr14:91593632-91594262	chr14	91593632	91594262	24	4.97567	Yes						FEMALE
chr9:140408283-140409128	chr9	140408283	140409128	24	5.07887	Yes						FEMALE
chr3:50188010-50188889	chr3	50188010	50188889	24	5.18159	Yes						FEMALE
chr16:22243849-22244594	chr16	22243849	22244594	24	5.20848	Yes						FEMALE
chr2:7932119-7932880	chr2	7932119	7932880	24	5.54398	Yes						FEMALE
chr17:48992382-48992983	chr17	48992382	48992983	24	5.72123	Yes	EPN3					FEMALE
chr11:12267064-12267658	chr11	12267064	12267658	24	5.75441	Yes						FEMALE
chr1:145246100-145246695	chr1	145246100	145246695	24	5.77443	Yes						FEMALE
chr7:2563324-2564236	chr7	2563324	2564236	24	5.78525	Yes						FEMALE
chr5:154209030-154209878	chr5	154209030	154209878	24	6.09121	Yes						FEMALE
chr6:44026196-44026852	chr6	44026196	44026852	24	6.11075	Yes						FEMALE
chr11:114186592-114187216	chr11	114186592	114187216	24	6.32758	Yes						FEMALE
chr6:125475829-125476461	chr6	125475829	125476461	24	6.35921	Yes	TPD52L1					FEMALE
chr6:43772161-43772875	chr6	43772161	43772875	24	6.5701	Yes						FEMALE
chr19:48151344-48152077	chr19	48151344	48152077	24	6.70301	Yes	C5AR2					FEMALE
chr2:46136659-46137232	chr2	46136659	46137232	24	6.83238	Yes						FEMALE
chr5:180022478-180023130	chr5	180022478	180023130	24	6.85354	Yes						FEMALE
chr2:238410916-238411559	chr2	238410916	238411559	24	6.8959	Yes	AC104667.3					FEMALE
chr22:46861538-46862368	chr22	46861538	46862368	24	6.9652	Yes						FEMALE
chr9:128223015-128223682	chr9	128223015	128223682	24	7.14131	Yes						FEMALE
chr17:75284806-75285340	chr17	75284806	75285340	24	7.18566	Yes						FEMALE
chr9:33329015-33329684	chr9	33329015	33329684	24	7.35421	Yes						FEMALE
chr10:51547208-51547870	chr10	51547208	51547870	24	7.84487	Yes						FEMALE
chr16:1346858-1347711	chr16	1346858	1347711	24	7.91041	Yes	RP11-616M22.7					FEMALE
chr18:42411560-42412160	chr18	42411560	42412160	24	7.93632	Yes		rs78955132:42411651:A:G	A	G	-0.1076	FEMALE
chr10:71078900-71079875	chr10	71078900	71079875	24	8.24933	Yes						FEMALE
chr9:33234015-33234750	chr9	33234015	33234750	24	8.41349	Yes						FEMALE
chr11:15515458-15516092	chr11	15515458	15516092	24	8.45071	Yes						FEMALE
chr7:151391875-151392523	chr7	151391875	151392523	24	8.49291	Yes						FEMALE
chr6:168791346-168792011	chr6	168791346	168792011	24	8.53442	Yes	SMOC2					FEMALE
chr5:137150930-137151628	chr5	137150930	137151628	24	8.55284	Yes						FEMALE
chr10:71198987-71199519	chr10	71198987	71199519	24	8.62261	Yes						FEMALE
chr10:5530214-5531015	chr10	5530214	5531015	24	9.13618	Yes						FEMALE
chr18:55460691-55461310	chr18	55460691	55461310	24	9.17254	Yes						FEMALE
chr13:114631564-114632203	chr13	114631564	114632203	24	9.4258	Yes						FEMALE
chr22:46773382-46773932	chr22	46773382	46773932	24	9.56242	Yes						FEMALE
chr15:83587902-83588630	chr15	83587902	83588630	24	9.59013	Yes						FEMALE
chr16:15581549-15582201	chr16	15581549	15582201	24	10.1284	Yes						FEMALE
chr12:97962408-97963010	chr12	97962408	97963010	24	10.2514	Yes						FEMALE
chr7:34076421-34077113	chr7	34076421	34077113	24	10.3115	Yes						FEMALE
chr18:57621410-57622014	chr18	57621410	57622014	24	10.5428	Yes						FEMALE
chr10:8170201-8170865	chr10	8170201	8170865	24	10.5824	Yes						FEMALE
chr17:61336056-61336651	chr17	61336056	61336651	24	10.5945	Yes						FEMALE
chr4:9700587-9701248	chr4	9700587	9701248	24	10.7874	Yes						FEMALE
chr2:20271311-20272075	chr2	20271311	20272075	24	10.8316	Yes						FEMALE
chr3:53585150-53585831	chr3	53585150	53585831	24	10.8457	Yes						FEMALE
chr3:194215600-194216173	chr3	194215600	194216173	24	10.9688	Yes						FEMALE
chr13:28609059-28609803	chr13	28609059	28609803	24	11.1199	Yes						FEMALE
chr6:73737911-73738575	chr6	73737911	73738575	24	11.3633	Yes						FEMALE
chr5:55964880-55965878	chr5	55964880	55965878	24	11.7172	Yes		rs889310:55965167:C:T	C	T	0.0462	FEMALE
chr10:32047814-32048425	chr10	32047814	32048425	24	12.6157	Yes						FEMALE
chr1:177445738-177446307	chr1	177445738	177446307	24	12.7697	Yes						FEMALE
chr4:1827491-1828123	chr4	1827491	1828123	24	12.9672	Yes						FEMALE
chr11:67983697-67984460	chr11	67983697	67984460	24	13.4887	Yes						FEMALE
chr6:88283672-88284324	chr6	88283672	88284324	24	13.7055	Yes						FEMALE
chr8:8094328-8095006	chr8	8094328	8095006	24	14.0343	Yes						FEMALE
chr18:59318291-59319541	chr18	59318291	59319541	23	2.8427	Yes						FEMALE
chr1:202081850-202082500	chr1	202081850	202082500	23	3.07346	Yes						FEMALE
chrX:39813065-39813670	chrX	39813065	39813670	23	3.23486	Yes						FEMALE
chr15:60685096-60685702	chr15	60685096	60685702	23	3.33507	Yes						FEMALE
chr15:89658654-89659263	chr15	89658654	89659263	23	3.5098	Yes						FEMALE
chr2:51240070-51240709	chr2	51240070	51240709	23	3.59217	Yes						FEMALE
chr20:46423966-46424573	chr20	46423966	46424573	23	4.07275	Yes						FEMALE
chr14:100525649-100526257	chr14	100525649	100526257	23	4.12706	Yes						FEMALE
chr22:50342466-50343318	chr22	50342466	50343318	23	4.17599	Yes						FEMALE
chr8:117336872-117337572	chr8	117336872	117337572	23	4.17716	Yes						FEMALE
chr12:6344415-6345080	chr12	6344415	6345080	23	4.32862	Yes						FEMALE
chr1:229356984-229357763	chr1	229356984	229357763	23	4.3529	Yes						FEMALE
chr16:23218649-23219519	chr16	23218649	23219519	23	4.36406	Yes						FEMALE
chr15:70766840-70767709	chr15	70766840	70767709	23	4.41951	Yes						FEMALE
chr20:24997847-24998423	chr20	24997847	24998423	23	4.59231	Yes						FEMALE
chr1:202015300-202015950	chr1	202015300	202015950	23	4.86897	Yes						FEMALE
chr6:135467625-135468281	chr6	135467625	135468281	23	4.87331	Yes						FEMALE
chr8:103659722-103660372	chr8	103659722	103660372	23	5.08028	Yes						FEMALE
chr3:58025765-58026289	chr3	58025765	58026289	23	5.09766	Yes						FEMALE
chr6:42085870-42086779	chr6	42085870	42086779	23	5.21988	Yes						FEMALE
chr22:50346667-50347246	chr22	50346667	50347246	23	5.29906	Yes						FEMALE
chr4:28315656-28316436	chr4	28315656	28316436	23	5.49378	Yes						FEMALE
chr1:21960486-21961586	chr1	21960486	21961586	23	5.59375	Yes						FEMALE
chr15:90701246-90701802	chr15	90701246	90701802	23	5.64105	Yes	CIB1					FEMALE
chr12:63480260-63480860	chr12	63480260	63480860	23	5.67088	Yes						FEMALE
chr16:23434619-23435255	chr16	23434619	23435255	23	5.68577	Yes						FEMALE
chr10:29413720-29414354	chr10	29413720	29414354	23	5.74286	Yes						FEMALE
chr15:40361282-40361902	chr15	40361282	40361902	23	5.76426	Yes	C15orf57					FEMALE
chr22:29218832-29219482	chr22	29218832	29219482	23	5.78616	Yes	CTA-292E10.9					FEMALE
chr4:40365341-40366051	chr4	40365341	40366051	23	5.78964	Yes						FEMALE
chr12:123144008-123144663	chr12	123144008	123144663	23	6.18162	Yes						FEMALE
chr9:95750533-95751296	chr9	95750533	95751296	23	6.40799	Yes	SUSD3					FEMALE
chr17:80071775-80072378	chr17	80071775	80072378	23	6.49107	Yes						FEMALE
chr21:44764169-44764800	chr21	44764169	44764800	23	6.59632	Yes						FEMALE
chr3:52271589-52272381	chr3	52271589	52272381	23	6.76207	Yes						FEMALE
chr19:3374669-3375942	chr19	3374669	3375942	23	6.91609	Yes						FEMALE
chr8:128923347-128923972	chr8	128923347	128923972	23	7.20112	Yes	PVT1					FEMALE
chr15:70613402-70614040	chr15	70613402	70614040	23	7.63037	Yes						FEMALE
chr14:75721146-75722148	chr14	75721146	75722148	23	7.71867	Yes						FEMALE
chr20:52740097-52740686	chr20	52740097	52740686	23	7.91673	Yes						FEMALE
chr19:45221678-45222292	chr19	45221678	45222292	23	8.13688	Yes						FEMALE
chr15:40347199-40347932	chr15	40347199	40347932	23	8.20726	Yes						FEMALE
chr13:99068503-99069164	chr13	99068503	99069164	23	8.27439	Yes						FEMALE
chr3:187634800-187635439	chr3	187634800	187635439	23	8.2776	Yes						FEMALE
chr16:2379499-2380105	chr16	2379499	2380105	23	8.68818	Yes						FEMALE
chr19:2524897-2525497	chr19	2524897	2525497	23	8.79978	Yes						FEMALE
chr20:47562394-47562947	chr20	47562394	47562947	23	8.90648	Yes						FEMALE
chr11:30543113-30543663	chr11	30543113	30543663	23	8.91215	Yes						FEMALE
chr1:215713286-215714057	chr1	215713286	215714057	23	9.15329	Yes						FEMALE
chr1:32296095-32296807	chr1	32296095	32296807	23	9.16112	Yes						FEMALE
chr15:92115285-92115846	chr15	92115285	92115846	23	9.16805	Yes						FEMALE
chr2:241190570-241191519	chr2	241190570	241191519	23	9.19571	Yes						FEMALE
chr2:11262403-11263011	chr2	11262403	11263011	23	9.22472	Yes						FEMALE
chr20:52811773-52812373	chr20	52811773	52812373	23	9.76707	Yes						FEMALE
chr11:69706192-69706909	chr11	69706192	69706909	23	9.79456	Yes						FEMALE
chr8:120994835-120995522	chr8	120994835	120995522	23	9.80728	Yes						FEMALE
chr20:16521752-16522347	chr20	16521752	16522347	23	9.96634	Yes	KIF16B					FEMALE
chr6:151979079-151979775	chr6	151979079	151979775	23	10.0417	Yes						FEMALE
chr5:44568535-44569081	chr5	44568535	44569081	23	10.3201	Yes	RP11-53O19.1					FEMALE
chr18:46517100-46517710	chr18	46517100	46517710	23	10.6545	Yes						FEMALE
chr4:163571879-163572491	chr4	163571879	163572491	23	10.7278	Yes						FEMALE
chr11:10764242-10764851	chr11	10764242	10764851	23	10.728	Yes						FEMALE
chr5:139017658-139018394	chr5	139017658	139018394	23	10.8106	Yes	SIL1					FEMALE
chr6:122354475-122355054	chr6	122354475	122355054	23	10.8108	Yes						FEMALE
chr16:85322498-85323049	chr16	85322498	85323049	23	10.8765	Yes						FEMALE
chr11:15636916-15637542	chr11	15636916	15637542	23	11.0082	Yes						FEMALE
chr16:57656349-57657101	chr16	57656349	57657101	23	11.2915	Yes						FEMALE
chr1:235142250-235142986	chr1	235142250	235142986	23	11.3122	Yes						FEMALE
chr6:43878407-43878953	chr6	43878407	43878953	23	11.4071	Yes						FEMALE
chr1:48360257-48361436	chr1	48360257	48361436	23	11.4254	Yes						FEMALE
chr1:65509957-65510586	chr1	65509957	65510586	23	11.5988	Yes						FEMALE
chr8:8146577-8147172	chr8	8146577	8147172	23	11.633	Yes						FEMALE
chr2:157981668-157982225	chr2	157981668	157982225	23	11.7598	Yes						FEMALE
chr22:44315080-44315799	chr22	44315080	44315799	23	11.8344	Yes						FEMALE
chr19:23583072-23583619	chr19	23583072	23583619	23	12.0272	Yes						FEMALE
chr1:177417807-177418434	chr1	177417807	177418434	23	12.0463	Yes						FEMALE
chr1:15342236-15342882	chr1	15342236	15342882	23	12.1474	Yes						FEMALE
chr3:150562215-150562865	chr3	150562215	150562865	23	12.2015	Yes	SIAH2					FEMALE
chr7:34661945-34662886	chr7	34661945	34662886	23	12.3076	Yes						FEMALE
chr7:148901286-148901836	chr7	148901286	148901836	23	12.4197	Yes						FEMALE
chr1:30775636-30776391	chr1	30775636	30776391	23	12.5311	Yes						FEMALE
chr11:76483564-76484137	chr11	76483564	76484137	23	12.6424	Yes						FEMALE
chr7:64099718-64100318	chr7	64099718	64100318	23	12.9393	Yes						FEMALE
chr20:14931173-14931838	chr20	14931173	14931838	23	13.3496	Yes						FEMALE
chr9:95834383-95835065	chr9	95834383	95835065	23	13.3523	Yes						FEMALE
chr15:87407032-87407849	chr15	87407032	87407849	23	13.56	Yes						FEMALE
chr16:11799901-11800548	chr16	11799901	11800548	23	13.5918	Yes						FEMALE
chr4:105817791-105818513	chr4	105817791	105818513	23	13.7646	Yes						FEMALE
chr10:73068571-73069264	chr10	73068571	73069264	23	13.8774	Yes						FEMALE
chr14:106134626-106135176	chr14	106134626	106135176	23	14.2389	Yes	AL928761.1					FEMALE
chr7:45453673-45454275	chr7	45453673	45454275	23	14.2389	Yes						FEMALE
chr12:56387522-56388110	chr12	56387522	56388110	23	14.5283	Yes						FEMALE
chr14:37325199-37325882	chr14	37325199	37325882	22	0	No						FEMALE
chr22:29214332-29214991	chr22	29214332	29214991	22	0	No						FEMALE
chr1:62107972-62108794	chr1	62107972	62108794	22	2.46201	Yes						FEMALE
chr14:35805732-35806399	chr14	35805732	35806399	22	2.82287	Yes						FEMALE
chr3:176573615-176574215	chr3	176573615	176574215	22	3.67628	Yes						FEMALE
chr11:75053908-75054515	chr11	75053908	75054515	22	3.72396	Yes						FEMALE
chr1:205286282-205287100	chr1	205286282	205287100	22	3.86319	Yes						FEMALE
chr16:85492446-85493051	chr16	85492446	85493051	22	3.89424	Yes						FEMALE
chr15:60666715-60667302	chr15	60666715	60667302	22	4.37361	Yes						FEMALE
chr14:93412492-93413162	chr14	93412492	93413162	22	4.4345	Yes	ITPK1					FEMALE
chr3:193988337-193989437	chr3	193988337	193989437	22	4.57856	Yes						FEMALE
chr8:29144253-29144860	chr8	29144253	29144860	22	4.70706	Yes						FEMALE
chr20:3792173-3792950	chr20	3792173	3792950	22	4.96089	Yes						FEMALE
chr16:56404649-56405301	chr16	56404649	56405301	22	5.0136	Yes						FEMALE
chr1:226062886-226063639	chr1	226062886	226063639	22	5.02497	Yes						FEMALE
chr14:93477754-93478612	chr14	93477754	93478612	22	5.14015	Yes						FEMALE
chr7:157082136-157082896	chr7	157082136	157082896	22	5.3008	Yes						FEMALE
chr20:43968952-43969473	chr20	43968952	43969473	22	5.33115	Yes						FEMALE
chr1:246772007-246772658	chr1	246772007	246772658	22	5.33128	Yes						FEMALE
chr16:88829749-88830401	chr16	88829749	88830401	22	5.49873	Yes						FEMALE
chr3:53189679-53190315	chr3	53189679	53190315	22	5.57959	Yes						FEMALE
chr17:27073072-27074627	chr17	27073072	27074627	22	5.61343	Yes						FEMALE
chr16:56279949-56280599	chr16	56279949	56280599	22	5.77582	Yes						FEMALE
chr10:74091319-74092058	chr10	74091319	74092058	22	5.781	Yes						FEMALE
chr17:76392732-76393356	chr17	76392732	76393356	22	5.81531	Yes						FEMALE
chr11:44606208-44606808	chr11	44606208	44606808	22	5.83821	Yes						FEMALE
chr14:77385150-77386049	chr14	77385150	77386049	22	6.00373	Yes						FEMALE
chr17:8957287-8957988	chr17	8957287	8957988	22	6.04437	Yes						FEMALE
chr6:1641446-1642029	chr6	1641446	1642029	22	6.0613	Yes						FEMALE
chr15:71421734-71422602	chr15	71421734	71422602	22	6.16816	Yes	CT62					FEMALE
chr14:73993012-73993790	chr14	73993012	73993790	22	6.18286	Yes	ACOT1					FEMALE
chr1:45770250-45770807	chr1	45770250	45770807	22	6.34118	Yes						FEMALE
chr3:4755615-4756249	chr3	4755615	4756249	22	6.41733	Yes						FEMALE
chr14:95806499-95807162	chr14	95806499	95807162	22	6.43408	Yes						FEMALE
chr14:32978749-32979382	chr14	32978749	32979382	22	6.48201	Yes						FEMALE
chr8:67036188-67036860	chr8	67036188	67036860	22	6.53109	Yes						FEMALE
chr20:44622019-44622644	chr20	44622019	44622644	22	6.57144	Yes						FEMALE
chr22:30608467-30609110	chr22	30608467	30609110	22	6.66529	Yes						FEMALE
chr14:100478312-100479149	chr14	100478312	100479149	22	6.93035	Yes	DEGS2					FEMALE
chr5:177551004-177551782	chr5	177551004	177551782	22	6.95416	Yes						FEMALE
chr6:125518861-125519504	chr6	125518861	125519504	22	7.08711	Yes						FEMALE
chr11:93929442-93930063	chr11	93929442	93930063	22	7.1071	Yes						FEMALE
chr16:30071911-30072799	chr16	30071911	30072799	22	7.1256	Yes						FEMALE
chr9:95428106-95428794	chr9	95428106	95428794	22	7.19644	Yes						FEMALE
chr16:85525449-85526101	chr16	85525449	85526101	22	7.29074	Yes						FEMALE
chr19:3387622-3388297	chr19	3387622	3388297	22	7.31372	Yes						FEMALE
chr8:135723571-135724205	chr8	135723571	135724205	22	7.33443	Yes						FEMALE
chr1:156186182-156186757	chr1	156186182	156186757	22	7.41081	Yes						FEMALE
chr13:99072097-99072863	chr13	99072097	99072863	22	7.4151	Yes						FEMALE
chr20:19693297-19693847	chr20	19693297	19693847	22	7.44098	Yes						FEMALE
chr12:113683567-113684760	chr12	113683567	113684760	22	7.81558	Yes						FEMALE
chr1:17846586-17847507	chr1	17846586	17847507	22	7.82637	Yes						FEMALE
chr18:45979664-45980360	chr18	45979664	45980360	22	7.82735	Yes						FEMALE
chr21:43124297-43124982	chr21	43124297	43124982	22	7.95708	Yes						FEMALE
chr1:207016948-207017550	chr1	207016948	207017550	22	8.16441	Yes						FEMALE
chr17:73545216-73546129	chr17	73545216	73546129	22	8.38219	Yes						FEMALE
chr5:10288711-10289382	chr5	10288711	10289382	22	8.49395	Yes						FEMALE
chr16:29322111-29322799	chr16	29322111	29322799	22	8.54688	Yes						FEMALE
chr1:42255307-42255945	chr1	42255307	42255945	22	8.66752	Yes						FEMALE
chr12:46849659-46850517	chr12	46849659	46850517	22	8.68955	Yes						FEMALE
chr17:17790106-17790711	chr17	17790106	17790711	22	8.70183	Yes						FEMALE
chr1:201464450-201465436	chr1	201464450	201465436	22	8.72461	Yes						FEMALE
chr20:19110676-19111326	chr20	19110676	19111326	22	8.94952	Yes						FEMALE
chr8:117125122-117125896	chr8	117125122	117125896	22	8.96076	Yes						FEMALE
chr6:110876029-110876662	chr6	110876029	110876662	22	8.98027	Yes						FEMALE
chr11:114033458-114034092	chr11	114033458	114034092	22	9.06987	Yes						FEMALE
chr6:20200902-20201529	chr6	20200902	20201529	22	9.13291	Yes						FEMALE
chr8:67626044-67626785	chr8	67626044	67626785	22	9.18999	Yes	SGK3					FEMALE
chr2:65202359-65202932	chr2	65202359	65202932	22	9.31043	Yes						FEMALE
chr10:63169480-63170171	chr10	63169480	63170171	22	9.36514	Yes						FEMALE
chr8:135746844-135747441	chr8	135746844	135747441	22	9.37709	Yes						FEMALE
chr12:97894274-97894910	chr12	97894274	97894910	22	9.62575	Yes						FEMALE
chr9:130789039-130789643	chr9	130789039	130789643	22	9.64651	Yes						FEMALE
chr17:76417261-76418083	chr17	76417261	76418083	22	9.68063	Yes	SYNGR2					FEMALE
chr20:34615006-34615623	chr20	34615006	34615623	22	9.69285	Yes						FEMALE
chr15:90325202-90325955	chr15	90325202	90325955	22	10.3096	Yes						FEMALE
chrX:16607284-16607860	chrX	16607284	16607860	22	10.4521	Yes						FEMALE
chr18:43693650-43694267	chr18	43693650	43694267	22	10.4766	Yes						FEMALE
chr5:167743231-167743828	chr5	167743231	167743828	22	10.5322	Yes						FEMALE
chr3:8359634-8360265	chr3	8359634	8360265	22	10.7997	Yes						FEMALE
chr12:53365469-53366210	chr12	53365469	53366210	22	10.8543	Yes						FEMALE
chr20:58563073-58563623	chr20	58563073	58563623	22	10.8736	Yes						FEMALE
chr1:10010386-10010957	chr1	10010386	10010957	22	11.2848	Yes						FEMALE
chr18:49017888-49018550	chr18	49017888	49018550	22	11.3763	Yes						FEMALE
chr1:206862184-206862836	chr1	206862184	206862836	22	11.5409	Yes						FEMALE
chr3:170979323-170980229	chr3	170979323	170980229	22	11.6829	Yes						FEMALE
chr20:42930704-42931373	chr20	42930704	42931373	22	11.9853	Yes						FEMALE
chr22:39695858-39696680	chr22	39695858	39696680	22	11.9946	Yes						FEMALE
chr15:70670349-70670952	chr15	70670349	70670952	22	12.1681	Yes						FEMALE
chr4:77532437-77533157	chr4	77532437	77533157	22	12.1707	Yes						FEMALE
chr11:13356800-13357342	chr11	13356800	13357342	22	12.3014	Yes						FEMALE
chr1:215598264-215599012	chr1	215598264	215599012	22	12.3682	Yes						FEMALE
chr2:11672343-11673009	chr2	11672343	11673009	22	12.465	Yes						FEMALE
chr9:33818000-33818640	chr9	33818000	33818640	22	12.7471	Yes						FEMALE
chr17:31846606-31847232	chr17	31846606	31847232	22	12.7697	Yes						FEMALE
chr20:61045069-61045762	chr20	61045069	61045762	22	14.2109	Yes	GATA5					FEMALE
chr11:45182786-45183658	chr11	45182786	45183658	22	14.5563	Yes						FEMALE
chr11:11476158-11476764	chr11	11476158	11476764	21	2.4999	Yes						FEMALE
chr1:156426850-156427536	chr1	156426850	156427536	21	2.61787	Yes						FEMALE
chr4:78485264-78485901	chr4	78485264	78485901	21	2.82622	Yes						FEMALE
chr15:99295040-99295615	chr15	99295040	99295615	21	3.04209	Yes						FEMALE
chr20:49440636-49441315	chr20	49440636	49441315	21	3.23821	Yes						FEMALE
chr5:172331668-172332328	chr5	172331668	172332328	21	3.53436	Yes						FEMALE
chr20:55310147-55310800	chr20	55310147	55310800	21	3.91135	Yes						FEMALE
chr15:80455463-80456052	chr15	80455463	80456052	21	4.03921	Yes	FAH					FEMALE
chr17:55434656-55435373	chr17	55434656	55435373	21	4.2802	Yes						FEMALE
chr2:7171806-7172430	chr2	7171806	7172430	21	4.587	Yes						FEMALE
chr12:31902109-31902710	chr12	31902109	31902710	21	4.61174	Yes						FEMALE
chr19:18557642-18558370	chr19	18557642	18558370	21	4.61613	Yes		rs2303692:18557657:C:T	C	T	-0.0658	FEMALE
chr20:19764497-19765226	chr20	19764497	19765226	21	4.73477	Yes						FEMALE
chr12:87833859-87834518	chr12	87833859	87834518	21	4.8624	Yes						FEMALE
chr17:49025432-49026027	chr17	49025432	49026027	21	4.95633	Yes						FEMALE
chr7:99601449-99602167	chr7	99601449	99602167	21	5.07088	Yes						FEMALE
chr14:95522732-95523282	chr14	95522732	95523282	21	5.11694	Yes						FEMALE
chr15:69896252-69896802	chr15	69896252	69896802	21	5.21617	Yes						FEMALE
chr16:11706077-11706661	chr16	11706077	11706661	21	5.4274	Yes						FEMALE
chr9:132250684-132251440	chr9	132250684	132251440	21	5.45958	Yes						FEMALE
chr7:95179218-95179984	chr7	95179218	95179984	21	5.65998	Yes						FEMALE
chr11:67015992-67016596	chr11	67015992	67016596	21	5.92901	Yes						FEMALE
chr11:67913542-67914058	chr11	67913542	67914058	21	5.93576	Yes						FEMALE
chr15:69869137-69869702	chr15	69869137	69869702	21	5.95718	Yes						FEMALE
chr4:6752591-6753191	chr4	6752591	6753191	21	6.01863	Yes						FEMALE
chr20:24992297-24992852	chr20	24992297	24992852	21	6.07277	Yes						FEMALE
chr5:32144628-32145283	chr5	32144628	32145283	21	6.10686	Yes						FEMALE
chr1:204732681-204733291	chr1	204732681	204733291	21	6.15608	Yes						FEMALE
chr18:9757703-9758491	chr18	9757703	9758491	21	6.2746	Yes						FEMALE
chr11:66795108-66795792	chr11	66795108	66795792	21	6.31826	Yes						FEMALE
chr14:105934753-105935549	chr14	105934753	105935549	21	6.35973	Yes						FEMALE
chr11:116942011-116942528	chr11	116942011	116942528	21	6.36781	Yes						FEMALE
chr6:35750072-35750681	chr6	35750072	35750681	21	6.76734	Yes	CLPSL2					FEMALE
chr14:100045142-100045962	chr14	100045142	100045962	21	6.81313	Yes						FEMALE
chr1:184601750-184602436	chr1	184601750	184602436	21	7.24848	Yes						FEMALE
chr16:75063630-75064151	chr16	75063630	75064151	21	7.33443	Yes						FEMALE
chr18:51183610-51184218	chr18	51183610	51184218	21	7.33443	Yes						FEMALE
chr10:30831057-30831675	chr10	30831057	30831675	21	7.42416	Yes						FEMALE
chr22:30194839-30195666	chr22	30194839	30195666	21	7.43034	Yes						FEMALE
chr2:105097869-105098418	chr2	105097869	105098418	21	7.50818	Yes						FEMALE
chr3:15334315-15334915	chr3	15334315	15334915	21	7.57295	Yes						FEMALE
chr12:48415559-48416210	chr12	48415559	48416210	21	7.62838	Yes						FEMALE
chr17:17686284-17686956	chr17	17686284	17686956	21	7.67546	Yes						FEMALE
chr13:82879721-82880264	chr13	82879721	82880264	21	7.67977	Yes						FEMALE
chr4:153856973-153857673	chr4	153856973	153857673	21	7.68872	Yes						FEMALE
chr18:12948016-12948700	chr18	12948016	12948700	21	7.6894	Yes						FEMALE
chr3:156355381-156356015	chr3	156355381	156356015	21	7.92309	Yes						FEMALE
chr21:45595894-45596469	chr21	45595894	45596469	21	7.93649	Yes						FEMALE
chr9:92458283-92458915	chr9	92458283	92458915	21	8.03763	Yes						FEMALE
chr22:37592840-37594164	chr22	37592840	37594164	21	8.09683	Yes						FEMALE
chr2:165379009-165379632	chr2	165379009	165379632	21	8.29632	Yes						FEMALE
chr16:88993348-88993911	chr16	88993348	88993911	21	8.32305	Yes						FEMALE
chr5:67731128-67731678	chr5	67731128	67731678	21	8.34807	Yes						FEMALE
chr3:96915899-96916565	chr3	96915899	96916565	21	8.3811	Yes						FEMALE
chr22:41813866-41814482	chr22	41813866	41814482	21	8.39391	Yes						FEMALE
chr9:132168633-132169265	chr9	132168633	132169265	21	8.46208	Yes						FEMALE
chr17:35087322-35087927	chr17	35087322	35087927	21	8.49002	Yes						FEMALE
chr4:146657446-146658091	chr4	146657446	146658091	21	8.61729	Yes						FEMALE
chr7:131935673-131936525	chr7	131935673	131936525	21	8.66862	Yes						FEMALE
chr19:39620934-39621492	chr19	39620934	39621492	21	8.73236	Yes						FEMALE
chr19:46876863-46877616	chr19	46876863	46877616	21	9.15758	Yes						FEMALE
chr20:36688169-36688708	chr20	36688169	36688708	21	9.22617	Yes						FEMALE
chr12:120124180-120124767	chr12	120124180	120124767	21	9.23361	Yes						FEMALE
chr16:54457965-54458599	chr16	54457965	54458599	21	9.26617	Yes						FEMALE
chr21:16571947-16572800	chr21	16571947	16572800	21	9.30477	Yes		rs2823136:16571951:G:C	G	C	-0.0918	FEMALE
chr16:20599008-20599665	chr16	20599008	20599665	21	9.47052	Yes						FEMALE
chr2:218112132-218112682	chr2	218112132	218112682	21	9.52374	Yes						FEMALE
chr1:202077298-202077810	chr1	202077298	202077810	21	9.52601	Yes						FEMALE
chr6:42194461-42195761	chr6	42194461	42195761	21	9.82426	Yes						FEMALE
chr17:26824906-26825532	chr17	26824906	26825532	21	9.99229	Yes	FOXN1					FEMALE
chr12:2884580-2885160	chr12	2884580	2885160	21	10.0906	Yes						FEMALE
chr3:37220529-37221225	chr3	37220529	37221225	21	10.0992	Yes						FEMALE
chr6:120462696-120463423	chr6	120462696	120463423	21	10.2916	Yes						FEMALE
chr10:82726125-82726857	chr10	82726125	82726857	21	10.3096	Yes						FEMALE
chr6:53329592-53330146	chr6	53329592	53330146	21	10.4121	Yes	RP3-483K16.4					FEMALE
chr19:58350036-58350724	chr19	58350036	58350724	21	10.4586	Yes	CTD-2583A14.8					FEMALE
chr17:43390582-43391211	chr17	43390582	43391211	21	10.5685	Yes						FEMALE
chr17:43120472-43121206	chr17	43120472	43121206	21	10.6745	Yes						FEMALE
chr6:120004146-120004696	chr6	120004146	120004696	21	10.6812	Yes						FEMALE
chr2:113348859-113349482	chr2	113348859	113349482	21	10.7106	Yes	CHCHD5					FEMALE
chr18:60892791-60893417	chr18	60892791	60893417	21	10.8069	Yes						FEMALE
chr10:112549501-112550158	chr10	112549501	112550158	21	10.9189	Yes						FEMALE
chr5:122184858-122185481	chr5	122184858	122185481	21	11.0462	Yes	SNX24					FEMALE
chr22:37908134-37908882	chr22	37908134	37908882	21	11.4013	Yes						FEMALE
chr1:212731157-212731900	chr1	212731157	212731900	21	11.7425	Yes						FEMALE
chr12:15395917-15396932	chr12	15395917	15396932	21	12.011	Yes						FEMALE
chr7:2728673-2729236	chr7	2728673	2729236	21	12.3856	Yes	AMZ1					FEMALE
chr14:100603482-100604032	chr14	100603482	100604032	21	12.5893	Yes	DEGS2					FEMALE
chr15:75063103-75063708	chr15	75063103	75063708	21	12.7235	Yes						FEMALE
chr14:69412532-69413103	chr14	69412532	69413103	21	13.0601	Yes						FEMALE
chr8:11647051-11647672	chr8	11647051	11647672	21	13.1335	Yes						FEMALE
chr3:125643515-125644065	chr3	125643515	125644065	21	13.1449	Yes						FEMALE
chr7:36124322-36125095	chr7	36124322	36125095	21	13.4864	Yes						FEMALE
chr4:143536329-143536991	chr4	143536329	143536991	21	13.9115	Yes						FEMALE
chr1:178694849-178695744	chr1	178694849	178695744	21	14.2389	Yes	RALGPS2					FEMALE
chr10:120760106-120760758	chr10	120760106	120760758	20	2.13463	Yes						FEMALE
chr21:36109197-36109825	chr21	36109197	36109825	20	2.62157	Yes						FEMALE
chr11:129194292-129194958	chr11	129194292	129194958	20	2.66601	Yes						FEMALE
chr11:17260847-17261308	chr11	17260847	17261308	20	2.78878	Yes	KCNJ11					FEMALE
chr16:11591149-11591827	chr16	11591149	11591827	20	3.36526	Yes						FEMALE
chr16:19142699-19143249	chr16	19142699	19143249	20	3.54731	Yes						FEMALE
chr1:184591350-184592086	chr1	184591350	184592086	20	3.70255	Yes						FEMALE
chr17:77892777-77893356	chr17	77892777	77893356	20	4.04356	Yes						FEMALE
chr19:18806697-18807317	chr19	18806697	18807317	20	4.24744	Yes						FEMALE
chr10:5545365-5545920	chr10	5545365	5545920	20	4.4553	Yes						FEMALE
chr11:76499464-76500214	chr11	76499464	76500214	20	4.48147	Yes						FEMALE
chr8:37159522-37160672	chr8	37159522	37160672	20	4.50539	Yes						FEMALE
chr19:45362292-45362892	chr19	45362292	45362892	20	4.67918	Yes	PVRL2					FEMALE
chr11:3443708-3444369	chr11	3443708	3444369	20	4.99452	Yes						FEMALE
chr9:7146850-7147515	chr9	7146850	7147515	20	5.01431	Yes						FEMALE
chr16:1680653-1681303	chr16	1680653	1681303	20	5.04802	Yes						FEMALE
chr4:6634814-6635441	chr4	6634814	6635441	20	5.12659	Yes						FEMALE
chr19:34032592-34033306	chr19	34032592	34033306	20	5.12678	Yes						FEMALE
chr2:8713659-8714325	chr2	8713659	8714325	20	5.16697	Yes						FEMALE
chr5:44002631-44003231	chr5	44002631	44003231	20	5.29448	Yes						FEMALE
chr6:125523229-125523846	chr6	125523229	125523846	20	5.35763	Yes						FEMALE
chr16:23373848-23374403	chr16	23373848	23374403	20	5.39246	Yes						FEMALE
chr15:70616181-70617002	chr15	70616181	70617002	20	5.4399	Yes						FEMALE
chr17:39949356-39950156	chr17	39949356	39950156	20	5.54028	Yes						FEMALE
chr10:112190558-112191108	chr10	112190558	112191108	20	5.54481	Yes						FEMALE
chr8:128964272-128964872	chr8	128964272	128964872	20	5.54562	Yes						FEMALE
chr6:31477696-31478296	chr6	31477696	31478296	20	5.55319	Yes						FEMALE
chr12:94955780-94956292	chr12	94955780	94956292	20	5.60948	Yes						FEMALE
chr22:48320860-48321460	chr22	48320860	48321460	20	5.65815	Yes						FEMALE
chr6:135575503-135576075	chr6	135575503	135576075	20	5.74402	Yes	MYB					FEMALE
chr12:53288930-53289530	chr12	53288930	53289530	20	5.8113	Yes	KRT18					FEMALE
chr3:4791765-4792365	chr3	4791765	4792365	20	5.94154	Yes						FEMALE
chr3:13153589-13154165	chr3	13153589	13154165	20	6.06452	Yes	HDAC11					FEMALE
chr16:10652607-10653399	chr16	10652607	10653399	20	6.09475	Yes						FEMALE
chr19:58310153-58310997	chr19	58310153	58310997	20	6.18106	Yes						FEMALE
chr16:23551481-23552099	chr16	23551481	23552099	20	6.26152	Yes						FEMALE
chr1:16950444-16951086	chr1	16950444	16951086	20	6.305	Yes						FEMALE
chr20:34652544-34653247	chr20	34652544	34653247	20	6.4154	Yes						FEMALE
chr17:29981956-29982509	chr17	29981956	29982509	20	6.42004	Yes						FEMALE
chr1:36952308-36952986	chr1	36952308	36952986	20	6.52024	Yes						FEMALE
chr14:96729903-96730652	chr14	96729903	96730652	20	6.70369	Yes						FEMALE
chr22:21241666-21242273	chr22	21241666	21242273	20	6.72039	Yes						FEMALE
chr2:129861666-129862382	chr2	129861666	129862382	20	6.77929	Yes						FEMALE
chr1:180136907-180137586	chr1	180136907	180137586	20	6.81358	Yes						FEMALE
chr21:44850533-44851278	chr21	44850533	44851278	20	6.87805	Yes						FEMALE
chr6:53330604-53331011	chr6	53330604	53331011	20	6.95589	Yes						FEMALE
chr8:140770472-140771160	chr8	140770472	140771160	20	6.96422	Yes						FEMALE
chr4:77484501-77485173	chr4	77484501	77485173	20	7.06043	Yes						FEMALE
chr12:121664980-121665580	chr12	121664980	121665580	20	7.10314	Yes						FEMALE
chr1:156441213-156442007	chr1	156441213	156442007	20	7.27311	Yes						FEMALE
chr3:53179161-53179839	chr3	53179161	53179839	20	7.36987	Yes	PRKCD					FEMALE
chr7:105710574-105711086	chr7	105710574	105711086	20	7.3784	Yes						FEMALE
chr1:43457913-43458557	chr1	43457913	43458557	20	7.51269	Yes						FEMALE
chr1:21568086-21568681	chr1	21568086	21568681	20	7.90723	Yes						FEMALE
chr6:148579881-148580462	chr6	148579881	148580462	20	8.00508	Yes						FEMALE
chr2:7889032-7889659	chr2	7889032	7889659	20	8.01469	Yes						FEMALE
chr20:34737339-34737935	chr20	34737339	34737935	20	8.11716	Yes						FEMALE
chr2:33295082-33295736	chr2	33295082	33295736	20	8.31152	Yes						FEMALE
chrX:69440143-69440693	chrX	69440143	69440693	20	8.50043	Yes						FEMALE
chr1:25892834-25893858	chr1	25892834	25893858	20	8.55627	Yes						FEMALE
chr10:12914601-12915758	chr10	12914601	12915758	20	8.61658	Yes						FEMALE
chr10:125503364-125504008	chr10	125503364	125504008	20	8.64275	Yes						FEMALE
chr5:33614181-33614830	chr5	33614181	33614830	20	8.65766	Yes						FEMALE
chr8:116999872-117000572	chr8	116999872	117000572	20	8.77499	Yes						FEMALE
chr10:79629614-79630208	chr10	79629614	79630208	20	8.80385	Yes						FEMALE
chr17:40124822-40125456	chr17	40124822	40125456	20	8.88589	Yes						FEMALE
chr2:238418632-238419182	chr2	238418632	238419182	20	8.88882	Yes						FEMALE
chr9:83986665-83987165	chr9	83986665	83987165	20	8.89258	Yes						FEMALE
chr1:71914231-71914838	chr1	71914231	71914838	20	8.94943	Yes						FEMALE
chr18:41456518-41457217	chr18	41456518	41457217	20	9.04583	Yes						FEMALE
chr11:125820958-125821666	chr11	125820958	125821666	20	9.0825	Yes	RP11-680F20.6					FEMALE
chr2:218196209-218196932	chr2	218196209	218196932	20	9.19514	Yes						FEMALE
chr22:30686932-30687482	chr22	30686932	30687482	20	9.24913	Yes						FEMALE
chr16:20450996-20451577	chr16	20450996	20451577	20	9.47052	Yes						FEMALE
chr3:66533660-66534339	chr3	66533660	66534339	20	9.60297	Yes						FEMALE
chr8:29667063-29667676	chr8	29667063	29667676	20	9.66893	Yes						FEMALE
chr15:79223213-79224058	chr15	79223213	79224058	20	10.1834	Yes						FEMALE
chr11:115342047-115342646	chr11	115342047	115342646	20	10.3893	Yes						FEMALE
chr1:245209966-245210608	chr1	245209966	245210608	20	10.4487	Yes						FEMALE
chr7:34530586-34531196	chr7	34530586	34531196	20	10.4948	Yes						FEMALE
chr1:152715500-152716295	chr1	152715500	152716295	20	10.892	Yes						FEMALE
chr14:26193498-26194044	chr14	26193498	26194044	20	10.9469	Yes						FEMALE
chr20:43970776-43971662	chr20	43970776	43971662	20	11.0797	Yes						FEMALE
chr9:97545289-97545965	chr9	97545289	97545965	20	11.0999	Yes						FEMALE
chr3:43038029-43038739	chr3	43038029	43038739	20	11.1288	Yes						FEMALE
chr3:27366081-27366757	chr3	27366081	27366757	20	11.268	Yes						FEMALE
chr5:136477631-136478381	chr5	136477631	136478381	20	11.2779	Yes						FEMALE
chr21:16235633-16236200	chr21	16235633	16236200	20	11.4087	Yes						FEMALE
chr22:43787166-43787782	chr22	43787166	43787782	20	11.7762	Yes						FEMALE
chr4:75504891-75505536	chr4	75504891	75505536	20	12.1572	Yes	AREG					FEMALE
chr3:66466373-66467041	chr3	66466373	66467041	20	12.2769	Yes						FEMALE
chr2:43500695-43501290	chr2	43500695	43501290	20	12.7697	Yes						FEMALE
chr2:227046245-227046825	chr2	227046245	227046825	20	12.804	Yes						FEMALE
chr6:45643396-45643961	chr6	45643396	45643961	20	12.9289	Yes						FEMALE
chr20:47188589-47189223	chr20	47188589	47189223	20	12.9817	Yes						FEMALE
chr16:80710348-80710933	chr16	80710348	80710933	20	13.0086	Yes						FEMALE
chr15:71376127-71376702	chr15	71376127	71376702	20	13.0501	Yes	CT62					FEMALE
chr2:11664475-11665093	chr2	11664475	11665093	20	13.1335	Yes						FEMALE
chr11:87829036-87829753	chr11	87829036	87829753	20	13.3523	Yes						FEMALE
chr22:24922073-24922638	chr22	24922073	24922638	20	13.56	Yes						FEMALE
chr14:106090844-106091449	chr14	106090844	106091449	20	13.7646	Yes	AL928761.1					FEMALE
chr2:189715459-189716059	chr2	189715459	189716059	20	13.8979	Yes						FEMALE
chr10:80274530-80275258	chr10	80274530	80275258	20	14.2153	Yes						FEMALE
chr12:102942210-102942792	chr12	102942210	102942792	20	14.3517	Yes						FEMALE
chr3:174854250-174854981	chr3	174854250	174854981	20	14.5419	Yes						FEMALE
chr7:2579009-2579591	chr7	2579009	2579591	20	14.5563	Yes						FEMALE
chr17:31149416-31150032	chr17	31149416	31150032	19	0	No						FEMALE
chr19:13273394-13274136	chr19	13273394	13274136	19	0	No						FEMALE
chr8:55471222-55471910	chr8	55471222	55471910	19	0	No						FEMALE
chr9:83935883-83936540	chr9	83935883	83936540	19	0	No						FEMALE
chrX:106968993-106969543	chrX	106968993	106969543	19	0	No						FEMALE
chr1:177554600-177555243	chr1	177554600	177555243	19	2.41531	Yes						FEMALE
chr17:66293006-66293784	chr17	66293006	66293784	19	3.05446	Yes						FEMALE
chr9:112078458-112079083	chr9	112078458	112079083	19	3.05588	Yes						FEMALE
chr16:85714801-85715311	chr16	85714801	85715311	19	3.12763	Yes						FEMALE
chr9:140092333-140092939	chr9	140092333	140092939	19	3.25257	Yes						FEMALE
chr1:22740708-22741286	chr1	22740708	22741286	19	3.39176	Yes						FEMALE
chr11:63325996-63326692	chr11	63325996	63326692	19	3.49414	Yes	HRASLS2					FEMALE
chr19:7716942-7717492	chr19	7716942	7717492	19	3.59443	Yes						FEMALE
chr17:38705356-38706091	chr17	38705356	38706091	19	3.71032	Yes	RARA					FEMALE
chr3:27356289-27356973	chr3	27356289	27356973	19	3.89215	Yes		rs616820:27356779:C:G	C	G	0.1142	FEMALE
chr19:18873092-18873797	chr19	18873092	18873797	19	3.93399	Yes						FEMALE
chr2:237895040-237895659	chr2	237895040	237895659	19	4.16378	Yes	MLPH					FEMALE
chr3:104329957-104330539	chr3	104329957	104330539	19	4.18626	Yes						FEMALE
chr5:124242030-124242728	chr5	124242030	124242728	19	4.22073	Yes						FEMALE
chr12:124873480-124874220	chr12	124873480	124874220	19	4.26999	Yes						FEMALE
chr3:5028379-5029007	chr3	5028379	5029007	19	4.33221	Yes						FEMALE
chr10:75579121-75579819	chr10	75579121	75579819	19	4.41951	Yes						FEMALE
chr3:195641487-195642139	chr3	195641487	195642139	19	4.48109	Yes						FEMALE
chr2:157038532-157039119	chr2	157038532	157039119	19	4.59794	Yes						FEMALE
chr16:85603899-85604549	chr16	85603899	85604549	19	4.70022	Yes	GSE1					FEMALE
chr1:210650607-210651300	chr1	210650607	210651300	19	4.72625	Yes						FEMALE
chrX:71601577-71602293	chrX	71601577	71602293	19	4.83681	Yes						FEMALE
chr1:201573950-201574600	chr1	201573950	201574600	19	4.86876	Yes						FEMALE
chr8:75488514-75489260	chr8	75488514	75489260	19	4.93514	Yes						FEMALE
chr6:150038604-150039311	chr6	150038604	150039311	19	5.00474	Yes						FEMALE
chr22:43689538-43690273	chr22	43689538	43690273	19	5.04198	Yes						FEMALE
chr6:109010411-109011004	chr6	109010411	109011004	19	5.10905	Yes						FEMALE
chr3:187526580-187527357	chr3	187526580	187527357	19	5.11311	Yes						FEMALE
chr17:70147591-70148282	chr17	70147591	70148282	19	5.12291	Yes	SOX9-AS1					FEMALE
chr10:76503056-76503669	chr10	76503056	76503669	19	5.12412	Yes						FEMALE
chr1:235132850-235133513	chr1	235132850	235133513	19	5.13989	Yes						FEMALE
chr17:41916882-41917554	chr17	41916882	41917554	19	5.17103	Yes						FEMALE
chr14:65433532-65434149	chr14	65433532	65434149	19	5.18324	Yes						FEMALE
chr1:208021536-208022086	chr1	208021536	208022086	19	5.25128	Yes						FEMALE
chr2:220263423-220264069	chr2	220263423	220264069	19	5.27928	Yes	STK16					FEMALE
chr15:83611296-83611909	chr15	83611296	83611909	19	5.28381	Yes						FEMALE
chr8:101499944-101500572	chr8	101499944	101500572	19	5.31542	Yes						FEMALE
chr12:3424280-3424910	chr12	3424280	3424910	19	5.42503	Yes						FEMALE
chr6:15251511-15252079	chr6	15251511	15252079	19	5.48165	Yes						FEMALE
chr6:33684911-33685495	chr6	33684911	33685495	19	5.64226	Yes						FEMALE
chr3:176585965-176586589	chr3	176585965	176586589	19	5.64616	Yes						FEMALE
chr9:97401246-97401794	chr9	97401246	97401794	19	5.65742	Yes	FBP1					FEMALE
chr12:116736897-116737810	chr12	116736897	116737810	19	5.66799	Yes						FEMALE
chr2:168994009-168994575	chr2	168994009	168994575	19	5.67444	Yes						FEMALE
chr2:55172612-55173411	chr2	55172612	55173411	19	5.74754	Yes						FEMALE
chr19:4715319-4716322	chr19	4715319	4716322	19	5.7991	Yes						FEMALE
chrX:109195094-109195694	chrX	109195094	109195694	19	5.81438	Yes						FEMALE
chr11:48107958-48108466	chr11	48107958	48108466	19	6.00597	Yes						FEMALE
chr3:133175665-133176249	chr3	133175665	133176249	19	6.02642	Yes						FEMALE
chrX:131315243-131315794	chrX	131315243	131315794	19	6.10306	Yes						FEMALE
chr10:71181608-71182125	chr10	71181608	71182125	19	6.34831	Yes						FEMALE
chr20:44002306-44002870	chr20	44002306	44002870	19	6.42613	Yes						FEMALE
chr18:21209348-21209957	chr18	21209348	21209957	19	6.43176	Yes						FEMALE
chr2:97554082-97554668	chr2	97554082	97554668	19	6.44101	Yes						FEMALE
chr8:37548772-37549472	chr8	37548772	37549472	19	6.45314	Yes						FEMALE
chr10:43606114-43606764	chr10	43606114	43606764	19	6.49599	Yes	RET					FEMALE
chr16:68268027-68268749	chr16	68268027	68268749	19	6.50036	Yes						FEMALE
chr4:141641714-141642323	chr4	141641714	141642323	19	6.50129	Yes						FEMALE
chr18:10893167-10893670	chr18	10893167	10893670	19	6.61886	Yes						FEMALE
chr1:235012082-235012740	chr1	235012082	235012740	19	6.6544	Yes						FEMALE
chr9:130307586-130308233	chr9	130307586	130308233	19	6.80544	Yes						FEMALE
chr2:11671009-11671575	chr2	11671009	11671575	19	6.8859	Yes	GREB1					FEMALE
chr2:62520619-62521309	chr2	62520619	62521309	19	6.92926	Yes						FEMALE
chr17:80255232-80256508	chr17	80255232	80256508	19	6.94939	Yes						FEMALE
chr1:47496586-47497157	chr1	47496586	47497157	19	6.95306	Yes						FEMALE
chr18:43382560-43383291	chr18	43382560	43383291	19	7.0608	Yes						FEMALE
chr6:15089854-15090623	chr6	15089854	15090623	19	7.07795	Yes						FEMALE
chr6:109005979-109006581	chr6	109005979	109006581	19	7.18363	Yes						FEMALE
chr4:6751048-6751673	chr4	6751048	6751673	19	7.1921	Yes	CCDC96					FEMALE
chr12:115539749-115540260	chr12	115539749	115540260	19	7.23055	Yes						FEMALE
chr3:9140265-9140865	chr3	9140265	9140865	19	7.43673	Yes						FEMALE
chr11:44610808-44611408	chr11	44610808	44611408	19	7.43781	Yes						FEMALE
chr3:150032257-150032815	chr3	150032257	150032815	19	7.43923	Yes						FEMALE
chr12:123547310-123547980	chr12	123547310	123547980	19	7.55095	Yes						FEMALE
chr5:71146644-71147035	chr5	71146644	71147035	19	7.57598	Yes						FEMALE
chr19:10612525-10613188	chr19	10612525	10613188	19	7.60597	Yes						FEMALE
chr17:78874456-78875132	chr17	78874456	78875132	19	7.84431	Yes						FEMALE
chr19:49322660-49323274	chr19	49322660	49323274	19	7.87998	Yes						FEMALE
chr15:89663002-89663659	chr15	89663002	89663659	19	7.95679	Yes						FEMALE
chr19:47599394-47600097	chr19	47599394	47600097	19	7.9849	Yes						FEMALE
chr19:6236785-6237366	chr19	6236785	6237366	19	7.99773	Yes						FEMALE
chr5:55717778-55718378	chr5	55717778	55718378	19	8.09027	Yes						FEMALE
chr4:3463023-3463787	chr4	3463023	3463787	19	8.15064	Yes						FEMALE
chr2:28565191-28565832	chr2	28565191	28565832	19	8.25846	Yes						FEMALE
chr10:104470420-104470938	chr10	104470420	104470938	19	8.34335	Yes						FEMALE
chr16:73049453-73050049	chr16	73049453	73050049	19	8.49145	Yes						FEMALE
chr8:37424310-37425314	chr8	37424310	37425314	19	8.54163	Yes						FEMALE
chr17:38470706-38471256	chr17	38470706	38471256	19	8.88638	Yes						FEMALE
chr6:6881996-6882511	chr6	6881996	6882511	19	8.94025	Yes						FEMALE
chr17:29827144-29827782	chr17	29827144	29827782	19	8.99346	Yes						FEMALE
chr9:138285434-138286093	chr9	138285434	138286093	19	9.00433	Yes						FEMALE
chr14:23355782-23356499	chr14	23355782	23356499	19	9.0252	Yes						FEMALE
chr22:30804632-30805232	chr22	30804632	30805232	19	9.1812	Yes						FEMALE
chr5:77157330-77157955	chr5	77157330	77157955	19	9.37546	Yes						FEMALE
chr1:42333781-42334384	chr1	42333781	42334384	19	9.40226	Yes						FEMALE
chr11:2214446-2214996	chr11	2214446	2214996	19	9.55881	Yes						FEMALE
chr3:85829269-85829931	chr3	85829269	85829931	19	9.68645	Yes						FEMALE
chr2:133339730-133340482	chr2	133339730	133340482	19	9.81948	Yes						FEMALE
chr19:3384792-3385374	chr19	3384792	3385374	19	10.0603	Yes						FEMALE
chr15:70321596-70322196	chr15	70321596	70322196	19	10.1833	Yes						FEMALE
chr14:77577362-77578149	chr14	77577362	77578149	19	10.4364	Yes						FEMALE
chr1:34125899-34126536	chr1	34125899	34126536	19	10.4549	Yes						FEMALE
chr4:2938741-2939338	chr4	2938741	2939338	19	10.5357	Yes						FEMALE
chr18:18767841-18768517	chr18	18767841	18768517	19	10.5524	Yes						FEMALE
chr7:91388350-91388974	chr7	91388350	91388974	19	10.5581	Yes						FEMALE
chr12:103569317-103569909	chr12	103569317	103569909	19	10.6337	Yes	ASCL1					FEMALE
chr21:16959101-16959733	chr21	16959101	16959733	19	10.6549	Yes						FEMALE
chr3:22905465-22906015	chr3	22905465	22906015	19	10.7965	Yes						FEMALE
chr9:110005996-110006662	chr9	110005996	110006662	19	10.8575	Yes						FEMALE
chr2:7148141-7148882	chr2	7148141	7148882	19	10.9374	Yes						FEMALE
chr8:22601203-22601799	chr8	22601203	22601799	19	10.9438	Yes	RP11-459E5.1					FEMALE
chr4:105829041-105829729	chr4	105829041	105829729	19	10.9747	Yes						FEMALE
chr11:120507758-120508403	chr11	120507758	120508403	19	11.0745	Yes						FEMALE
chr15:74890440-74891096	chr15	74890440	74891096	19	11.225	Yes						FEMALE
chr1:21573557-21574195	chr1	21573557	21574195	19	11.4839	Yes						FEMALE
chr11:95120437-95120992	chr11	95120437	95120992	19	11.4984	Yes						FEMALE
chr2:46322960-46323593	chr2	46322960	46323593	19	11.8814	Yes						FEMALE
chr16:86227201-86227851	chr16	86227201	86227851	19	12.4061	Yes						FEMALE
chr17:78368343-78368982	chr17	78368343	78368982	19	12.4642	Yes						FEMALE
chr8:17187103-17187656	chr8	17187103	17187656	19	12.6362	Yes						FEMALE
chr6:167418896-167419525	chr6	167418896	167419525	19	12.6652	Yes						FEMALE
chr1:44296350-44296998	chr1	44296350	44296998	19	12.9521	Yes	ARTN					FEMALE
chr19:19110174-19110803	chr19	19110174	19110803	19	13.0121	Yes						FEMALE
chr5:133372881-133373345	chr5	133372881	133373345	19	13.3115	Yes						FEMALE
chr7:142827478-142828128	chr7	142827478	142828128	19	13.6525	Yes						FEMALE
chr19:7700544-7700983	chr19	7700544	7700983	19	13.741	Yes						FEMALE
chr4:3468529-3469098	chr4	3468529	3469098	19	14.5419	Yes						FEMALE
chr1:184898986-184899507	chr1	184898986	184899507	18	0	No						FEMALE
chr2:100684188-100684845	chr2	100684188	100684845	18	0	No						FEMALE
chr3:58456939-58457565	chr3	58456939	58457565	18	0	No						FEMALE
chr9:85656583-85657130	chr9	85656583	85657130	18	0	No						FEMALE
chr9:92284183-92284696	chr9	92284183	92284696	18	2.0382	Yes						FEMALE
chr1:225960095-225960936	chr1	225960095	225960936	18	2.57448	Yes						FEMALE
chr9:112093533-112094140	chr9	112093533	112094140	18	2.61891	Yes						FEMALE
chr14:38119582-38120312	chr14	38119582	38120312	18	2.83135	Yes						FEMALE
chr20:25020339-25021097	chr20	25020339	25021097	18	2.85007	Yes						FEMALE
chr10:93882750-93883320	chr10	93882750	93883320	18	2.88962	Yes						FEMALE
chr8:122438922-122439553	chr8	122438922	122439553	18	3.06026	Yes						FEMALE
chr7:129588773-129589399	chr7	129588773	129589399	18	3.06701	Yes						FEMALE
chr14:96562132-96562732	chr14	96562132	96562732	18	3.10429	Yes						FEMALE
chr5:1555378-1555945	chr5	1555378	1555945	18	3.1402	Yes						FEMALE
chr20:36352058-36352590	chr20	36352058	36352590	18	3.21156	Yes						FEMALE
chr19:51574197-51574792	chr19	51574197	51574792	18	3.61737	Yes						FEMALE
chr6:40364161-40364854	chr6	40364161	40364854	18	3.66822	Yes						FEMALE
chr11:45000386-45001008	chr11	45000386	45001008	18	3.72901	Yes						FEMALE
chrX:54667143-54667794	chrX	54667143	54667794	18	3.73115	Yes						FEMALE
chr8:102450535-102451160	chr8	102450535	102451160	18	3.76572	Yes						FEMALE
chr22:46770982-46771541	chr22	46770982	46771541	18	3.77413	Yes						FEMALE
chr19:18490966-18491542	chr19	18490966	18491542	18	3.81055	Yes						FEMALE
chr17:80110378-80110956	chr17	80110378	80110956	18	3.82753	Yes						FEMALE
chrX:108297355-108297974	chrX	108297355	108297974	18	3.84064	Yes						FEMALE
chr2:225774666-225775491	chr2	225774666	225775491	18	3.93241	Yes						FEMALE
chr1:117811336-117812007	chr1	117811336	117812007	18	4.01368	Yes						FEMALE
chr17:25659472-25660272	chr17	25659472	25660272	18	4.0376	Yes						FEMALE
chr5:167780134-167780928	chr5	167780134	167780928	18	4.16021	Yes						FEMALE
chr21:16816500-16817147	chr21	16816500	16817147	18	4.1646	Yes						FEMALE
chr10:7275365-7276108	chr10	7275365	7276108	18	4.1731	Yes						FEMALE
chr6:43639611-43640196	chr6	43639611	43640196	18	4.27617	Yes						FEMALE
chr7:41547272-41547896	chr7	41547272	41547896	18	4.27977	Yes						FEMALE
chr3:186694719-186695557	chr3	186694719	186695557	18	4.29509	Yes						FEMALE
chr2:240189793-240190470	chr2	240189793	240190470	18	4.29946	Yes						FEMALE
chr12:52596946-52597693	chr12	52596946	52597693	18	4.50257	Yes						FEMALE
chr10:80062857-80063508	chr10	80062857	80063508	18	4.51534	Yes						FEMALE
chr14:76002153-76002732	chr14	76002153	76002732	18	4.54584	Yes						FEMALE
chr17:48986532-48987132	chr17	48986532	48987132	18	4.59911	Yes						FEMALE
chr8:66934199-66934944	chr8	66934199	66934944	18	4.68418	Yes						FEMALE
chr1:184807686-184808282	chr1	184807686	184808282	18	4.69934	Yes						FEMALE
chr17:48543632-48544209	chr17	48543632	48544209	18	4.79721	Yes	CHAD					FEMALE
chr18:21207160-21207710	chr18	21207160	21207710	18	4.82415	Yes						FEMALE
chr7:23374191-23374674	chr7	23374191	23374674	18	4.83154	Yes						FEMALE
chr20:50003973-50004573	chr20	50003973	50004573	18	4.85853	Yes						FEMALE
chr17:71304206-71304856	chr17	71304206	71304856	18	4.88948	Yes						FEMALE
chr1:25802634-25803245	chr1	25802634	25803245	18	4.9377	Yes						FEMALE
chr15:66124896-66125552	chr15	66124896	66125552	18	4.95757	Yes						FEMALE
chr2:73212920-73213724	chr2	73212920	73213724	18	5.01601	Yes	SFXN5					FEMALE
chr1:205532950-205533636	chr1	205532950	205533636	18	5.06658	Yes						FEMALE
chr12:13036259-13036859	chr12	13036259	13036859	18	5.06677	Yes						FEMALE
chr8:11719910-11720528	chr8	11719910	11720528	18	5.16006	Yes						FEMALE
chr12:53568680-53569333	chr12	53568680	53569333	18	5.27737	Yes	KRT18					FEMALE
chr17:38732327-38733309	chr17	38732327	38733309	18	5.28386	Yes						FEMALE
chr5:32233778-32234428	chr5	32233778	32234428	18	5.35623	Yes						FEMALE
chr8:58767747-58768322	chr8	58767747	58768322	18	5.42471	Yes						FEMALE
chr7:7435273-7435875	chr7	7435273	7435875	18	5.45432	Yes						FEMALE
chr10:80906370-80907019	chr10	80906370	80907019	18	5.48087	Yes						FEMALE
chr22:26326582-26327238	chr22	26326582	26327238	18	5.48728	Yes						FEMALE
chr6:150168096-150168646	chr6	150168096	150168646	18	5.51734	Yes						FEMALE
chr8:25265460-25266093	chr8	25265460	25266093	18	5.56597	Yes						FEMALE
chr17:66374456-66375390	chr17	66374456	66375390	18	5.63941	Yes	ARSG					FEMALE
chr7:36076725-36077386	chr7	36076725	36077386	18	5.72137	Yes						FEMALE
chr2:65133969-65134580	chr2	65133969	65134580	18	5.74554	Yes						FEMALE
chr7:50838923-50839475	chr7	50838923	50839475	18	5.76676	Yes						FEMALE
chr22:32975608-32976367	chr22	32975608	32976367	18	5.77692	Yes	LL22NC03-104C7.1					FEMALE
chr16:88749-89449	chr16	88749	89449	18	5.78012	Yes						FEMALE
chr19:58358442-58358947	chr19	58358442	58358947	18	5.811	Yes	ZNF552					FEMALE
chr6:6748661-6749531	chr6	6748661	6749531	18	5.85584	Yes						FEMALE
chr12:125230316-125230980	chr12	125230316	125230980	18	5.91125	Yes						FEMALE
chr5:131762978-131763578	chr5	131762978	131763578	18	5.94055	Yes						FEMALE
chr16:88831299-88831855	chr16	88831299	88831855	18	6.01896	Yes						FEMALE
chr17:29907856-29908756	chr17	29907856	29908756	18	6.14872	Yes						FEMALE
chr1:54738907-54739658	chr1	54738907	54739658	18	6.28978	Yes						FEMALE
chrX:39843044-39843883	chrX	39843044	39843883	18	6.29869	Yes						FEMALE
chr4:757398-758141	chr4	757398	758141	18	6.4203	Yes	CPLX1					FEMALE
chr22:24699200-24699891	chr22	24699200	24699891	18	6.52509	Yes						FEMALE
chr14:61328912-61329549	chr14	61328912	61329549	18	6.52907	Yes						FEMALE
chr22:24927957-24928554	chr22	24927957	24928554	18	6.55137	Yes						FEMALE
chr21:42955100-42955650	chr21	42955100	42955650	18	6.56812	Yes						FEMALE
chr5:142236845-142237408	chr5	142236845	142237408	18	6.60699	Yes						FEMALE
chr1:41385012-41385586	chr1	41385012	41385586	18	6.7196	Yes						FEMALE
chr6:34504211-34504811	chr6	34504211	34504811	18	6.73559	Yes						FEMALE
chr20:48220947-48221456	chr20	48220947	48221456	18	6.76757	Yes						FEMALE
chr7:99552872-99553812	chr7	99552872	99553812	18	6.78713	Yes	AZGP1P1					FEMALE
chr12:125093510-125094092	chr12	125093510	125094092	18	6.82094	Yes						FEMALE
chr8:134633144-134633660	chr8	134633144	134633660	18	7.05222	Yes						FEMALE
chr19:1907642-1908274	chr19	1907642	1908274	18	7.09148	Yes						FEMALE
chr22:43594632-43595338	chr22	43594632	43595338	18	7.16314	Yes	SCUBE1					FEMALE
chr19:16192692-16193191	chr19	16192692	16193191	18	7.20614	Yes						FEMALE
chr4:186558373-186559062	chr4	186558373	186559062	18	7.32205	Yes						FEMALE
chr16:17265049-17265555	chr16	17265049	17265555	18	7.36877	Yes						FEMALE
chr20:43375736-43376376	chr20	43375736	43376376	18	7.36891	Yes	RIMS4					FEMALE
chr12:54198060-54198742	chr12	54198060	54198742	18	7.39112	Yes						FEMALE
chr11:34689532-34690316	chr11	34689532	34690316	18	7.47693	Yes						FEMALE
chr1:39608257-39608946	chr1	39608257	39608946	18	7.47728	Yes						FEMALE
chr19:15673747-15674524	chr19	15673747	15674524	18	7.55784	Yes						FEMALE
chr8:102372994-102373622	chr8	102372994	102373622	18	7.60221	Yes						FEMALE
chr2:113934259-113934809	chr2	113934259	113934809	18	7.75699	Yes						FEMALE
chr1:227002700-227003348	chr1	227002700	227003348	18	7.86503	Yes						FEMALE
chr1:223617745-223618400	chr1	223617745	223618400	18	7.98445	Yes						FEMALE
chr9:112851989-112852783	chr9	112851989	112852783	18	8.05681	Yes						FEMALE
chr14:34250449-34251149	chr14	34250449	34251149	18	8.06175	Yes						FEMALE
chr15:70385746-70386396	chr15	70385746	70386396	18	8.09539	Yes						FEMALE
chr8:17385235-17385828	chr8	17385235	17385828	18	8.30565	Yes						FEMALE
chr17:55911475-55912106	chr17	55911475	55912106	18	8.3078	Yes						FEMALE
chr20:30628473-30629023	chr20	30628473	30629023	18	8.41788	Yes						FEMALE
chr13:24062553-24063165	chr13	24062553	24063165	18	8.61197	Yes						FEMALE
chr15:62404910-62405565	chr15	62404910	62405565	18	8.71361	Yes						FEMALE
chr1:155149571-155150186	chr1	155149571	155150186	18	8.80313	Yes		rs3814316:155149718:G:A	G	A	0.0489	FEMALE
chr8:143627872-143628472	chr8	143627872	143628472	18	8.84758	Yes	ARC					FEMALE
chr22:40059660-40060478	chr22	40059660	40060478	18	9.25324	Yes	CACNA1I					FEMALE
chr14:64701564-64702149	chr14	64701564	64702149	18	9.3107	Yes						FEMALE
chr11:84398413-84399042	chr11	84398413	84399042	18	9.31608	Yes						FEMALE
chr10:4170120-4170720	chr10	4170120	4170720	18	9.32605	Yes						FEMALE
chr1:32798244-32798907	chr1	32798244	32798907	18	9.49032	Yes						FEMALE
chr11:76746336-76746982	chr11	76746336	76746982	18	9.53191	Yes						FEMALE
chr4:97622987-97623541	chr4	97622987	97623541	18	9.66553	Yes						FEMALE
chr15:26105252-26106030	chr15	26105252	26106030	18	9.71758	Yes						FEMALE
chr10:9080108-9080758	chr10	9080108	9080758	18	9.86074	Yes						FEMALE
chr9:115146984-115147552	chr9	115146984	115147552	18	9.87654	Yes						FEMALE
chr2:161490868-161491459	chr2	161490868	161491459	18	9.88587	Yes						FEMALE
chr8:139289412-139289972	chr8	139289412	139289972	18	10.0804	Yes						FEMALE
chr1:91565332-91566236	chr1	91565332	91566236	18	10.1163	Yes						FEMALE
chr18:24155191-24155841	chr18	24155191	24155841	18	10.1284	Yes						FEMALE
chr12:119608928-119609510	chr12	119608928	119609510	18	10.3096	Yes						FEMALE
chr12:26254196-26254860	chr12	26254196	26254860	18	10.407	Yes						FEMALE
chr16:4071049-4071799	chr16	4071049	4071799	18	10.4118	Yes						FEMALE
chr1:235804850-235805658	chr1	235804850	235805658	18	10.4417	Yes						FEMALE
chr12:125226510-125227092	chr12	125226510	125227092	18	10.4664	Yes						FEMALE
chr8:118414626-118415253	chr8	118414626	118415253	18	10.639	Yes						FEMALE
chr1:244185808-244186586	chr1	244185808	244186586	18	10.7393	Yes						FEMALE
chr16:69358298-69358949	chr16	69358298	69358949	18	11.0029	Yes						FEMALE
chr11:35411253-35411897	chr11	35411253	35411897	18	11.8803	Yes						FEMALE
chr6:38404730-38405322	chr6	38404730	38405322	18	12.2218	Yes						FEMALE
chr22:35661104-35661732	chr22	35661104	35661732	18	12.4853	Yes						FEMALE
chr7:141395534-141396125	chr7	141395534	141396125	18	12.5074	Yes						FEMALE
chr20:10642973-10643523	chr20	10642973	10643523	18	12.6362	Yes						FEMALE
chr9:108132265-108132931	chr9	108132265	108132931	18	12.7454	Yes						FEMALE
chr11:121196813-121197413	chr11	121196813	121197413	18	12.8251	Yes						FEMALE
chr13:98530414-98531114	chr13	98530414	98531114	18	12.8902	Yes						FEMALE
chr12:46887367-46888096	chr12	46887367	46888096	18	13.1335	Yes						FEMALE
chrX:17843593-17844293	chrX	17843593	17844293	18	13.3378	Yes						FEMALE
chr4:56813237-56813910	chr4	56813237	56813910	18	13.7753	Yes						FEMALE
chr11:129564358-129564908	chr11	129564358	129564908	18	13.9267	Yes						FEMALE
chr18:21302400-21303060	chr18	21302400	21303060	18	14.0736	Yes						FEMALE
chr1:209393283-209393857	chr1	209393283	209393857	17	0	No						FEMALE
chr1:211816788-211817550	chr1	211816788	211817550	17	0	No						FEMALE
chr2:10627209-10627706	chr2	10627209	10627706	17	0	No						FEMALE
chr20:31961523-31962286	chr20	31961523	31962286	17	0	No						FEMALE
chr8:129169541-129170044	chr8	129169541	129170044	17	0	No		rs7001706:129169758:G:C	G	C	0.0543	FEMALE
chr7:73236649-73237334	chr7	73236649	73237334	17	2.28634	Yes						FEMALE
chr8:129103222-129103772	chr8	129103222	129103772	17	2.39658	Yes						FEMALE
chr6:149775511-149776111	chr6	149775511	149776111	17	2.39795	Yes						FEMALE
chr21:44936697-44937400	chr21	44936697	44937400	17	2.55585	Yes						FEMALE
chr1:212320736-212321310	chr1	212320736	212321310	17	2.64063	Yes						FEMALE
chr1:24894386-24895007	chr1	24894386	24895007	17	2.82325	Yes						FEMALE
chr16:4233149-4234199	chr16	4233149	4234199	17	2.92943	Yes						FEMALE
chr1:117161649-117162307	chr1	117161649	117162307	17	2.97606	Yes						FEMALE
chr3:129381765-129382357	chr3	129381765	129382357	17	2.98434	Yes						FEMALE
chr12:120154209-120154858	chr12	120154209	120154858	17	3.0274	Yes						FEMALE
chr16:27603099-27603633	chr16	27603099	27603633	17	3.04353	Yes	NSMCE1					FEMALE
chr22:38173082-38173672	chr22	38173082	38173672	17	3.17634	Yes						FEMALE
chr7:73241836-73242575	chr7	73241836	73242575	17	3.44067	Yes						FEMALE
chr1:57013457-57014036	chr1	57013457	57014036	17	3.52773	Yes						FEMALE
chr1:230893799-230894386	chr1	230893799	230894386	17	3.57703	Yes						FEMALE
chr17:49012656-49013332	chr17	49012656	49013332	17	3.71414	Yes	SPATA20					FEMALE
chr15:31508425-31508987	chr15	31508425	31508987	17	3.72011	Yes						FEMALE
chr20:46556290-46557076	chr20	46556290	46557076	17	3.77804	Yes						FEMALE
chr19:38422842-38423459	chr19	38422842	38423459	17	3.78571	Yes						FEMALE
chr17:72764206-72764759	chr17	72764206	72764759	17	3.78801	Yes						FEMALE
chr10:77022406-77022913	chr10	77022406	77022913	17	3.79838	Yes						FEMALE
chr17:78042287-78043001	chr17	78042287	78043001	17	3.80761	Yes	CCDC40					FEMALE
chr2:120501809-120502382	chr2	120501809	120502382	17	3.86739	Yes						FEMALE
chr10:14613920-14614525	chr10	14613920	14614525	17	3.87091	Yes						FEMALE
chr12:102002054-102002830	chr12	102002054	102002830	17	4.00034	Yes						FEMALE
chrX:121497165-121497944	chrX	121497165	121497944	17	4.00651	Yes						FEMALE
chr19:2154447-2155024	chr19	2154447	2155024	17	4.01657	Yes						FEMALE
chr1:160285045-160285686	chr1	160285045	160285686	17	4.12167	Yes						FEMALE
chr1:112597007-112597584	chr1	112597007	112597584	17	4.13089	Yes	KCND3					FEMALE
chr7:42332525-42333174	chr7	42332525	42333174	17	4.13752	Yes						FEMALE
chr19:16256192-16256747	chr19	16256192	16256747	17	4.16766	Yes	HSH2D					FEMALE
chr11:114049858-114050464	chr11	114049858	114050464	17	4.22171	Yes						FEMALE
chr22:29730682-29731317	chr22	29730682	29731317	17	4.26208	Yes						FEMALE
chr14:95065431-95066012	chr14	95065431	95066012	17	4.29841	Yes						FEMALE
chr2:74210659-74211351	chr2	74210659	74211351	17	4.30448	Yes						FEMALE
chr2:110402141-110402659	chr2	110402141	110402659	17	4.36622	Yes						FEMALE
chr11:65188558-65189066	chr11	65188558	65189066	17	4.36889	Yes						FEMALE
chr3:187754139-187754900	chr3	187754139	187754900	17	4.37268	Yes						FEMALE
chr15:84422547-84423252	chr15	84422547	84423252	17	4.37316	Yes						FEMALE
chr7:75933992-75934725	chr7	75933992	75934725	17	4.56431	Yes						FEMALE
chr3:58082509-58083065	chr3	58082509	58083065	17	4.56929	Yes						FEMALE
chr15:31588759-31589363	chr15	31588759	31589363	17	4.57304	Yes						FEMALE
chr17:48942706-48943209	chr17	48942706	48943209	17	4.59742	Yes	MRPL27					FEMALE
chr21:46933178-46933819	chr21	46933178	46933819	17	4.62714	Yes						FEMALE
chr2:204974219-204974882	chr2	204974219	204974882	17	4.6481	Yes						FEMALE
chr9:94914107-94914815	chr9	94914107	94914815	17	4.74791	Yes						FEMALE
chr17:72189027-72189582	chr17	72189027	72189582	17	4.7622	Yes	GPRC5C					FEMALE
chr18:43006791-43007369	chr18	43006791	43007369	17	4.8445	Yes						FEMALE
chr20:37233473-37234047	chr20	37233473	37234047	17	4.86218	Yes						FEMALE
chr8:37761372-37762022	chr8	37761372	37762022	17	4.89039	Yes						FEMALE
chr7:158807974-158808636	chr7	158807974	158808636	17	5.00176	Yes						FEMALE
chr17:55970106-55970858	chr17	55970106	55970858	17	5.10959	Yes						FEMALE
chr3:66525889-66526535	chr3	66525889	66526535	17	5.12045	Yes						FEMALE
chr14:79791262-79791850	chr14	79791262	79791850	17	5.12786	Yes						FEMALE
chr7:51417875-51418646	chr7	51417875	51418646	17	5.15602	Yes						FEMALE
chr3:32151679-32152289	chr3	32151679	32152289	17	5.19529	Yes						FEMALE
chr5:177505128-177505768	chr5	177505128	177505768	17	5.19533	Yes	N4BP3					FEMALE
chr21:37565519-37566014	chr21	37565519	37566014	17	5.19663	Yes						FEMALE
chr20:62372023-62372936	chr20	62372023	62372936	17	5.30213	Yes						FEMALE
chr10:17429854-17430620	chr10	17429854	17430620	17	5.45831	Yes						FEMALE
chr6:35695636-35696246	chr6	35695636	35696246	17	5.46249	Yes						FEMALE
chr10:95205208-95205770	chr10	95205208	95205770	17	5.51317	Yes						FEMALE
chr7:7361224-7361825	chr7	7361224	7361825	17	5.56794	Yes						FEMALE
chr2:150846009-150846632	chr2	150846009	150846632	17	5.60806	Yes						FEMALE
chr9:91616083-91616715	chr9	91616083	91616715	17	5.65492	Yes						FEMALE
chr10:105649808-105650358	chr10	105649808	105650358	17	5.65884	Yes						FEMALE
chr3:65938939-65939496	chr3	65938939	65939496	17	5.74423	Yes						FEMALE
chr17:78734306-78734932	chr17	78734306	78734932	17	5.77082	Yes						FEMALE
chr6:151954654-151955231	chr6	151954654	151955231	17	5.93081	Yes	RNU6-813P					FEMALE
chr1:19753536-19754157	chr1	19753536	19754157	17	5.93141	Yes						FEMALE
chr4:89332664-89333198	chr4	89332664	89333198	17	5.93629	Yes						FEMALE
chr11:18092553-18093313	chr11	18092553	18093313	17	5.95693	Yes						FEMALE
chr16:52598901-52599548	chr16	52598901	52599548	17	6.10355	Yes		rs3104744:52599394:C:T	C	T	-0.0722	FEMALE
chr17:48545556-48546208	chr17	48545556	48546208	17	6.11435	Yes						FEMALE
chr10:27270970-27271565	chr10	27270970	27271565	17	6.11737	Yes						FEMALE
chr2:220264670-220265270	chr2	220264670	220265270	17	6.22275	Yes						FEMALE
chr17:60877832-60878406	chr17	60877832	60878406	17	6.26964	Yes						FEMALE
chr2:25301318-25302230	chr2	25301318	25302230	17	6.27185	Yes						FEMALE
chr1:177409957-177410507	chr1	177409957	177410507	17	6.2853	Yes						FEMALE
chr12:56552717-56553310	chr12	56552717	56553310	17	6.301	Yes						FEMALE
chr12:122234860-122235480	chr12	122234860	122235480	17	6.31815	Yes						FEMALE
chr8:99794122-99794810	chr8	99794122	99794810	17	6.32968	Yes						FEMALE
chr12:6373687-6374380	chr12	6373687	6374380	17	6.35047	Yes						FEMALE
chr17:46577222-46577934	chr17	46577222	46577934	17	6.41253	Yes						FEMALE
chr8:102449172-102449793	chr8	102449172	102449793	17	6.47415	Yes						FEMALE
chr8:120667303-120667822	chr8	120667303	120667822	17	6.51584	Yes						FEMALE
chr4:108966691-108967288	chr4	108966691	108967288	17	6.53584	Yes						FEMALE
chr12:125211830-125212360	chr12	125211830	125212360	17	6.54265	Yes						FEMALE
chr3:150491315-150491939	chr3	150491315	150491939	17	6.55353	Yes						FEMALE
chr3:50638398-50639589	chr3	50638398	50639589	17	6.57448	Yes						FEMALE
chr2:54216403-54217106	chr2	54216403	54217106	17	6.63352	Yes						FEMALE
chr7:116764478-116765323	chr7	116764478	116765323	17	6.69463	Yes						FEMALE
chr9:85554400-85554840	chr9	85554400	85554840	17	6.71456	Yes						FEMALE
chr1:17355856-17356508	chr1	17355856	17356508	17	6.72992	Yes						FEMALE
chrX:109416394-109416944	chrX	109416394	109416944	17	6.7677	Yes						FEMALE
chr1:116810657-116811207	chr1	116810657	116811207	17	6.78017	Yes						FEMALE
chr19:42278297-42278871	chr19	42278297	42278871	17	6.78715	Yes						FEMALE
chr17:37862006-37862656	chr17	37862006	37862656	17	6.81755	Yes						FEMALE
chr18:46523179-46523924	chr18	46523179	46523924	17	6.84788	Yes						FEMALE
chr9:88742035-88742733	chr9	88742035	88742733	17	6.89415	Yes						FEMALE
chr9:84202494-84203499	chr9	84202494	84203499	17	6.91428	Yes						FEMALE
chr19:4697292-4697909	chr19	4697292	4697909	17	6.98557	Yes						FEMALE
chr13:99302514-99303064	chr13	99302514	99303064	17	7.02521	Yes						FEMALE
chr20:23338426-23339197	chr20	23338426	23339197	17	7.18336	Yes						FEMALE
chr20:19028273-19028952	chr20	19028273	19028952	17	7.21381	Yes						FEMALE
chr4:75869291-75869945	chr4	75869291	75869945	17	7.35234	Yes						FEMALE
chr20:38915562-38916297	chr20	38915562	38916297	17	7.38653	Yes						FEMALE
chr1:235011250-235011784	chr1	235011250	235011784	17	7.4056	Yes						FEMALE
chr1:235793658-235794271	chr1	235793658	235794271	17	7.41999	Yes						FEMALE
chr19:45574247-45575003	chr19	45574247	45575003	17	7.42246	Yes						FEMALE
chr1:41511957-41512545	chr1	41511957	41512545	17	7.47728	Yes						FEMALE
chr18:13425639-13426261	chr18	13425639	13426261	17	7.5299	Yes						FEMALE
chr12:52610880-52611610	chr12	52610880	52611610	17	7.57135	Yes						FEMALE
chr8:129483926-129484476	chr8	129483926	129484476	17	7.6861	Yes						FEMALE
chr7:132867574-132868386	chr7	132867574	132868386	17	7.74012	Yes						FEMALE
chr5:66510831-66512202	chr5	66510831	66512202	17	7.74435	Yes						FEMALE
chr11:69469108-69469966	chr11	69469108	69469966	17	7.75446	Yes	CCND1					FEMALE
chr14:77473782-77474799	chr14	77473782	77474799	17	7.95708	Yes	GSTZ1					FEMALE
chr19:34071097-34071782	chr19	34071097	34071782	17	7.99231	Yes						FEMALE
chr5:56052808-56053358	chr5	56052808	56053358	17	8.04494	Yes		rs79160707:56052938:C:T	C	T	0.245	FEMALE
chr2:70224482-70225160	chr2	70224482	70225160	17	8.04846	Yes						FEMALE
chr9:132517489-132518362	chr9	132517489	132518362	17	8.07222	Yes						FEMALE
chr16:68321561-68322301	chr16	68321561	68322301	17	8.10587	Yes						FEMALE
chr10:117902656-117903558	chr10	117902656	117903558	17	8.13362	Yes						FEMALE
chr11:68890096-68890764	chr11	68890096	68890764	17	8.14192	Yes						FEMALE
chr17:43201706-43202428	chr17	43201706	43202428	17	8.20245	Yes	PLCD3					FEMALE
chr13:109571459-109572221	chr13	109571459	109572221	17	8.20263	Yes						FEMALE
chr5:76463830-76464428	chr5	76463830	76464428	17	8.30755	Yes	PDE8B					FEMALE
chrX:93855093-93855834	chrX	93855093	93855834	17	8.42927	Yes						FEMALE
chr11:113055192-113055758	chr11	113055192	113055758	17	8.6086	Yes						FEMALE
chr22:48873054-48873710	chr22	48873054	48873710	17	8.61251	Yes						FEMALE
chr14:26750782-26751496	chr14	26750782	26751496	17	8.67711	Yes						FEMALE
chr11:69294558-69295192	chr11	69294558	69295192	17	8.70797	Yes	AP000439.3					FEMALE
chr1:204349500-204350150	chr1	204349500	204350150	17	8.75706	Yes						FEMALE
chr6:6703973-6704396	chr6	6703973	6704396	17	8.84185	Yes						FEMALE
chr4:185667614-185668486	chr4	185667614	185668486	17	8.84702	Yes						FEMALE
chr19:24005513-24006097	chr19	24005513	24006097	17	8.86756	Yes						FEMALE
chr1:203250034-203250688	chr1	203250034	203250688	17	9.02896	Yes						FEMALE
chr10:76581258-76582025	chr10	76581258	76582025	17	9.04372	Yes						FEMALE
chr16:4424899-4425499	chr16	4424899	4425499	17	9.04718	Yes						FEMALE
chr7:11300976-11301525	chr7	11300976	11301525	17	9.15329	Yes						FEMALE
chr14:94425699-94426315	chr14	94425699	94426315	17	9.37355	Yes						FEMALE
chr7:34787775-34788386	chr7	34787775	34788386	17	9.48746	Yes						FEMALE
chr6:33729811-33730361	chr6	33729811	33730361	17	9.58336	Yes						FEMALE
chr19:44242750-44243392	chr19	44242750	44243392	17	9.63945	Yes						FEMALE
chr3:107718169-107718722	chr3	107718169	107718722	17	9.65778	Yes						FEMALE
chr17:37028956-37029522	chr17	37028956	37029522	17	9.9343	Yes						FEMALE
chr16:88595903-88596505	chr16	88595903	88596505	17	9.97318	Yes						FEMALE
chrX:54774072-54774652	chrX	54774072	54774652	17	9.98226	Yes	MAGED2					FEMALE
chr12:64474292-64475417	chr12	64474292	64475417	17	9.98937	Yes						FEMALE
chr16:85505449-85506515	chr16	85505449	85506515	17	10.1246	Yes						FEMALE
chr10:6404820-6405408	chr10	6404820	6405408	17	10.1631	Yes						FEMALE
chr8:102132845-102133410	chr8	102132845	102133410	17	10.6239	Yes						FEMALE
chr4:141556831-141557337	chr4	141556831	141557337	17	10.7813	Yes						FEMALE
chr20:9512088-9512789	chr20	9512088	9512789	17	10.8036	Yes						FEMALE
chr2:62642232-62642859	chr2	62642232	62642859	17	10.8615	Yes						FEMALE
chr20:23576366-23577196	chr20	23576366	23577196	17	10.8927	Yes	CST9					FEMALE
chr10:117840070-117840563	chr10	117840070	117840563	17	11.059	Yes						FEMALE
chr1:17563736-17564388	chr1	17563736	17564388	17	11.0745	Yes						FEMALE
chr8:86919679-86920213	chr8	86919679	86920213	17	11.1237	Yes						FEMALE
chr4:52924391-52924948	chr4	52924391	52924948	17	11.1287	Yes						FEMALE
chr1:51772581-51773118	chr1	51772581	51773118	17	11.1339	Yes						FEMALE
chr5:16626681-16627245	chr5	16626681	16627245	17	11.165	Yes						FEMALE
chr1:207985344-207985998	chr1	207985344	207985998	17	11.2887	Yes						FEMALE
chr18:46121119-46121791	chr18	46121119	46121791	17	11.5467	Yes						FEMALE
chr1:245118707-245119300	chr1	245118707	245119300	17	11.5646	Yes						FEMALE
chr10:28545701-28546251	chr10	28545701	28546251	17	11.5809	Yes						FEMALE
chr1:199985850-199986508	chr1	199985850	199986508	17	11.71	Yes						FEMALE
chr6:31697146-31697973	chr6	31697146	31697973	17	11.8979	Yes						FEMALE
chr8:125476581-125477172	chr8	125476581	125477172	17	11.9232	Yes						FEMALE
chr1:178974550-178975200	chr1	178974550	178975200	17	12.1843	Yes						FEMALE
chr11:69952208-69952892	chr11	69952208	69952892	17	12.2758	Yes						FEMALE
chr19:1207847-1208403	chr19	1207847	1208403	17	12.2835	Yes						FEMALE
chr22:27741253-27742091	chr22	27741253	27742091	17	12.3789	Yes						FEMALE
chr19:19660497-19661068	chr19	19660497	19661068	17	12.3916	Yes						FEMALE
chr21:39140293-39140819	chr21	39140293	39140819	17	12.4523	Yes						FEMALE
chr1:36669294-36670244	chr1	36669294	36670244	17	12.5902	Yes						FEMALE
chr2:46047709-46048214	chr2	46047709	46048214	17	12.95	Yes						FEMALE
chr6:37537612-37538161	chr6	37537612	37538161	17	13.1449	Yes						FEMALE
chr5:106897508-106897968	chr5	106897508	106897968	17	13.4091	Yes						FEMALE
chr11:86382242-86383108	chr11	86382242	86383108	17	13.4236	Yes						FEMALE
chr6:42096857-42097375	chr6	42096857	42097375	17	13.8979	Yes						FEMALE
chr13:81964173-81964725	chr13	81964173	81964725	17	14.2289	Yes						FEMALE
chr8:69494528-69495128	chr8	69494528	69495128	17	14.2289	Yes						FEMALE
chr13:34921853-34922421	chr13	34921853	34922421	16	0	No						FEMALE
chr16:12382849-12383499	chr16	12382849	12383499	16	0	No						FEMALE
chr17:48943651-48944277	chr17	48943651	48944277	16	0	No						FEMALE
chr20:44048086-44048723	chr20	44048086	44048723	16	0	No						FEMALE
chr20:52402597-52403097	chr20	52402597	52403097	16	0	No						FEMALE
chr3:129225139-129225765	chr3	129225139	129225765	16	0	No						FEMALE
chr6:43766504-43767061	chr6	43766504	43767061	16	0	No						FEMALE
chr18:24322560-24323110	chr18	24322560	24323110	16	2.03307	Yes						FEMALE
chr20:19949252-19949797	chr20	19949252	19949797	16	2.12527	Yes						FEMALE
chr7:7394273-7394823	chr7	7394273	7394823	16	2.24164	Yes						FEMALE
chr11:65560587-65561108	chr11	65560587	65561108	16	2.35697	Yes						FEMALE
chr3:77742223-77742838	chr3	77742223	77742838	16	2.54966	Yes						FEMALE
chr2:20665794-20666632	chr2	20665794	20666632	16	2.61582	Yes						FEMALE
chr20:52701473-52702047	chr20	52701473	52702047	16	2.75197	Yes						FEMALE
chr8:69937890-69938631	chr8	69937890	69938631	16	2.80079	Yes						FEMALE
chr5:154224328-154224878	chr5	154224328	154224878	16	2.85551	Yes						FEMALE
chr3:172234515-172235139	chr3	172234515	172235139	16	2.95864	Yes						FEMALE
chr19:4694186-4694812	chr19	4694186	4694812	16	3.12066	Yes						FEMALE
chr14:35810732-35811282	chr14	35810732	35811282	16	3.17392	Yes						FEMALE
chr11:17008100-17009158	chr11	17008100	17009158	16	3.25038	Yes						FEMALE
chr7:98693674-98694273	chr7	98693674	98694273	16	3.26644	Yes						FEMALE
chr17:77967122-77967806	chr17	77967122	77967806	16	3.27739	Yes						FEMALE
chr18:29952448-29953160	chr18	29952448	29953160	16	3.28149	Yes						FEMALE
chr4:16142391-16142951	chr4	16142391	16142951	16	3.38719	Yes						FEMALE
chr11:61394164-61394758	chr11	61394164	61394758	16	3.38725	Yes						FEMALE
chr8:37891887-37892572	chr8	37891887	37892572	16	3.41924	Yes						FEMALE
chr20:46618412-46619147	chr20	46618412	46619147	16	3.45491	Yes						FEMALE
chr2:110448309-110449174	chr2	110448309	110449174	16	3.496	Yes						FEMALE
chr15:78295782-78296496	chr15	78295782	78296496	16	3.5418	Yes						FEMALE
chr16:15583061-15583769	chr16	15583061	15583769	16	3.60739	Yes						FEMALE
chr16:643399-643999	chr16	643399	643999	16	3.64107	Yes						FEMALE
chr1:94050586-94051144	chr1	94050586	94051144	16	3.67391	Yes						FEMALE
chr11:66822497-66823108	chr11	66822497	66823108	16	3.6755	Yes						FEMALE
chr16:2438710-2439299	chr16	2438710	2439299	16	3.69796	Yes						FEMALE
chr13:114301664-114302335	chr13	114301664	114302335	16	3.82285	Yes						FEMALE
chr11:72903258-72903834	chr11	72903258	72903834	16	3.86255	Yes	P2RY2					FEMALE
chr7:158805545-158806521	chr7	158805545	158806521	16	3.9285	Yes						FEMALE
chr10:43577458-43578058	chr10	43577458	43578058	16	4.04002	Yes	RET					FEMALE
chr2:223749498-223750228	chr2	223749498	223750228	16	4.10447	Yes						FEMALE
chr2:106071693-106072632	chr2	106071693	106072632	16	4.10495	Yes						FEMALE
chr10:93316419-93317115	chr10	93316419	93317115	16	4.11707	Yes						FEMALE
chr10:80686965-80687652	chr10	80686965	80687652	16	4.15401	Yes						FEMALE
chr9:73095533-73096090	chr9	73095533	73096090	16	4.16251	Yes						FEMALE
chr13:73707652-73708119	chr13	73707652	73708119	16	4.22706	Yes						FEMALE
chr1:147189057-147189748	chr1	147189057	147189748	16	4.27438	Yes						FEMALE
chr19:39328297-39329503	chr19	39328297	39329503	16	4.37246	Yes						FEMALE
chr20:48636036-48636747	chr20	48636036	48636747	16	4.38621	Yes						FEMALE
chr3:70786801-70787665	chr3	70786801	70787665	16	4.39182	Yes						FEMALE
chr15:89693996-89694634	chr15	89693996	89694634	16	4.44414	Yes						FEMALE
chr9:92282639-92283300	chr9	92282639	92283300	16	4.45914	Yes						FEMALE
chr18:55890941-55891760	chr18	55890941	55891760	16	4.5567	Yes						FEMALE
chr19:45256447-45256992	chr19	45256447	45256992	16	4.56497	Yes						FEMALE
chr7:921886-922475	chr7	921886	922475	16	4.59317	Yes						FEMALE
chr22:29426373-29427188	chr22	29426373	29427188	16	4.63466	Yes						FEMALE
chr21:40278919-40279484	chr21	40278919	40279484	16	4.65619	Yes						FEMALE
chr12:55285810-55286429	chr12	55285810	55286429	16	4.70994	Yes						FEMALE
chr17:48996977-48997656	chr17	48996977	48997656	16	4.73684	Yes						FEMALE
chr20:2748797-2749447	chr20	2748797	2749447	16	4.82328	Yes						FEMALE
chr2:201153375-201153859	chr2	201153375	201153859	16	4.86618	Yes						FEMALE
chr12:48338680-48339360	chr12	48338680	48339360	16	4.93039	Yes	RP11-89H19.2					FEMALE
chr17:80850709-80851282	chr17	80850709	80851282	16	4.93149	Yes						FEMALE
chr8:26059535-26060260	chr8	26059535	26060260	16	4.93607	Yes						FEMALE
chr1:22739007-22739686	chr1	22739007	22739686	16	5.03383	Yes						FEMALE
chr3:176665817-176666425	chr3	176665817	176666425	16	5.12691	Yes						FEMALE
chr1:161053150-161053785	chr1	161053150	161053785	16	5.22779	Yes						FEMALE
chr8:119395403-119396053	chr8	119395403	119396053	16	5.26771	Yes						FEMALE
chr11:120172508-120173214	chr11	120172508	120173214	16	5.27326	Yes						FEMALE
chr19:8426778-8427392	chr19	8426778	8427392	16	5.28272	Yes						FEMALE
chr1:118659086-118660536	chr1	118659086	118660536	16	5.29298	Yes						FEMALE
chr11:77772092-77772642	chr11	77772092	77772642	16	5.33831	Yes	NDUFC2					FEMALE
chr5:34585568-34586133	chr5	34585568	34586133	16	5.33937	Yes						FEMALE
chr9:77715912-77716400	chr9	77715912	77716400	16	5.37674	Yes						FEMALE
chr1:118132845-118133357	chr1	118132845	118133357	16	5.38535	Yes						FEMALE
chr5:55936878-55937395	chr5	55936878	55937395	16	5.46752	Yes						FEMALE
chr10:89878675-89879420	chr10	89878675	89879420	16	5.53063	Yes						FEMALE
chr22:38283582-38284132	chr22	38283582	38284132	16	5.57239	Yes						FEMALE
chr16:10922669-10923251	chr16	10922669	10923251	16	5.5857	Yes						FEMALE
chr9:112913854-112914433	chr9	112913854	112914433	16	5.67854	Yes	C9orf152					FEMALE
chr1:147010144-147011300	chr1	147010144	147011300	16	5.68476	Yes						FEMALE
chr22:39147417-39147982	chr22	39147417	39147982	16	5.72936	Yes						FEMALE
chr12:124895128-124895610	chr12	124895128	124895610	16	5.73763	Yes						FEMALE
chr18:55464218-55464891	chr18	55464218	55464891	16	5.74049	Yes						FEMALE
chr5:177508678-177509135	chr5	177508678	177509135	16	5.76487	Yes						FEMALE
chr1:7634336-7635008	chr1	7634336	7635008	16	5.76607	Yes						FEMALE
chr8:96124722-96125521	chr8	96124722	96125521	16	5.76909	Yes						FEMALE
chr17:70614056-70614611	chr17	70614056	70614611	16	5.78411	Yes						FEMALE
chr16:68741649-68742201	chr16	68741649	68742201	16	5.81731	Yes						FEMALE
chr11:34676347-34676913	chr11	34676347	34676913	16	5.85672	Yes						FEMALE
chr17:55417859-55418506	chr17	55417859	55418506	16	5.89997	Yes	MSI2					FEMALE
chr22:30707332-30707827	chr22	30707332	30707827	16	5.92559	Yes						FEMALE
chr14:96572373-96573042	chr14	96572373	96573042	16	6.00604	Yes						FEMALE
chr11:19940692-19941259	chr11	19940692	19941259	16	6.24935	Yes						FEMALE
chr20:25260547-25261206	chr20	25260547	25261206	16	6.25345	Yes						FEMALE
chr17:39693192-39693578	chr17	39693192	39693578	16	6.26316	Yes						FEMALE
chr13:53584672-53585303	chr13	53584672	53585303	16	6.33278	Yes						FEMALE
chr19:11009792-11010392	chr19	11009792	11010392	16	6.35128	Yes						FEMALE
chr1:116551236-116551807	chr1	116551236	116551807	16	6.36797	Yes						FEMALE
chr4:6281991-6282523	chr4	6281991	6282523	16	6.44672	Yes						FEMALE
chr11:3021608-3022216	chr11	3021608	3022216	16	6.4529	Yes						FEMALE
chr11:66516451-66516991	chr11	66516451	66516991	16	6.53247	Yes						FEMALE
chr22:43196698-43197382	chr22	43196698	43197382	16	6.84617	Yes						FEMALE
chr7:47615526-47616275	chr7	47615526	47616275	16	6.85223	Yes						FEMALE
chr5:134383132-134383632	chr5	134383132	134383632	16	6.87375	Yes	C5orf66-AS1					FEMALE
chr2:39675170-39675695	chr2	39675170	39675695	16	6.90175	Yes						FEMALE
chr18:57720960-57721560	chr18	57720960	57721560	16	6.92	Yes						FEMALE
chr10:79625365-79626113	chr10	79625365	79626113	16	6.9257	Yes						FEMALE
chr1:118113548-118114257	chr1	118113548	118114257	16	6.94744	Yes						FEMALE
chr20:809590-810076	chr20	809590	810076	16	6.95972	Yes						FEMALE
chr1:54481750-54482391	chr1	54481750	54482391	16	7.08051	Yes						FEMALE
chr5:139022730-139023358	chr5	139022730	139023358	16	7.08213	Yes						FEMALE
chr16:68271446-68272165	chr16	68271446	68272165	16	7.12452	Yes						FEMALE
chr1:31296698-31297599	chr1	31296698	31297599	16	7.12746	Yes						FEMALE
chr13:99136809-99137553	chr13	99136809	99137553	16	7.17724	Yes						FEMALE
chr19:46080442-46081253	chr19	46080442	46081253	16	7.32163	Yes						FEMALE
chr17:39929325-39929856	chr17	39929325	39929856	16	7.33419	Yes						FEMALE
chr19:47366992-47367880	chr19	47366992	47367880	16	7.40039	Yes						FEMALE
chr8:41427053-41427622	chr8	41427053	41427622	16	7.41453	Yes						FEMALE
chr17:26852122-26852775	chr17	26852122	26852775	16	7.44832	Yes						FEMALE
chr2:8679930-8680482	chr2	8679930	8680482	16	7.48475	Yes						FEMALE
chr5:151668083-151669339	chr5	151668083	151669339	16	7.57285	Yes						FEMALE
chr11:78022842-78023442	chr11	78022842	78023442	16	7.91031	Yes						FEMALE
chr5:117345528-117346031	chr5	117345528	117346031	16	8.02404	Yes						FEMALE
chr17:9110206-9110706	chr17	9110206	9110706	16	8.13791	Yes						FEMALE
chr6:158481386-158482461	chr6	158481386	158482461	16	8.20124	Yes						FEMALE
chrX:137093544-137094143	chrX	137093544	137094143	16	8.30519	Yes						FEMALE
chr5:32563542-32564218	chr5	32563542	32564218	16	8.30565	Yes						FEMALE
chr8:122163094-122163672	chr8	122163094	122163672	16	8.35592	Yes						FEMALE
chr14:104346132-104346868	chr14	104346132	104346868	16	8.37789	Yes						FEMALE
chr11:72938814-72939458	chr11	72938814	72939458	16	8.38413	Yes						FEMALE
chr3:50306115-50306739	chr3	50306115	50306739	16	8.40878	Yes						FEMALE
chr1:23778436-23778957	chr1	23778436	23778957	16	8.46405	Yes						FEMALE
chr2:212700259-212700871	chr2	212700259	212700871	16	8.49469	Yes						FEMALE
chr9:139589797-139590365	chr9	139589797	139590365	16	8.58227	Yes						FEMALE
chr16:50740048-50740601	chr16	50740048	50740601	16	8.70992	Yes						FEMALE
chr20:33526093-33526747	chr20	33526093	33526747	16	8.72068	Yes						FEMALE
chr16:85753748-85754277	chr16	85753748	85754277	16	8.80875	Yes						FEMALE
chr18:55379567-55380191	chr18	55379567	55380191	16	8.82207	Yes						FEMALE
chr2:43358224-43358961	chr2	43358224	43358961	16	8.8232	Yes						FEMALE
chr9:116846483-116847083	chr9	116846483	116847083	16	8.82766	Yes	KIF12					FEMALE
chr3:42861289-42861889	chr3	42861289	42861889	16	8.93884	Yes						FEMALE
chr16:66550449-66551151	chr16	66550449	66551151	16	8.94147	Yes						FEMALE
chr19:17451424-17452147	chr19	17451424	17452147	16	8.97132	Yes						FEMALE
chr8:133379772-133380331	chr8	133379772	133380331	16	9.00816	Yes						FEMALE
chr9:73033883-73035250	chr9	73033883	73035250	16	9.1495	Yes						FEMALE
chr19:11531023-11531582	chr19	11531023	11531582	16	9.1664	Yes	CCDC151					FEMALE
chrX:149209344-149209923	chrX	149209344	149209923	16	9.19269	Yes						FEMALE
chr10:88768058-88768565	chr10	88768058	88768565	16	9.2782	Yes						FEMALE
chr15:90379965-90380952	chr15	90379965	90380952	16	9.3542	Yes						FEMALE
chr9:13083290-13083833	chr9	13083290	13083833	16	9.46002	Yes						FEMALE
chr17:17743284-17744106	chr17	17743284	17744106	16	9.5111	Yes						FEMALE
chr17:39681727-39682321	chr17	39681727	39682321	16	9.51468	Yes						FEMALE
chr11:70781399-70781950	chr11	70781399	70781950	16	9.58248	Yes						FEMALE
chr6:99658611-99659204	chr6	99658611	99659204	16	9.61823	Yes						FEMALE
chr9:140067380-140068239	chr9	140067380	140068239	16	9.61973	Yes						FEMALE
chr1:44533186-44533757	chr1	44533186	44533757	16	9.6675	Yes						FEMALE
chr8:86852972-86854122	chr8	86852972	86854122	16	9.76943	Yes						FEMALE
chr10:79239706-79240319	chr10	79239706	79240319	16	9.82561	Yes						FEMALE
chr2:47184132-47184732	chr2	47184132	47184732	16	9.97142	Yes						FEMALE
chr7:41612573-41613146	chr7	41612573	41613146	16	10.0063	Yes						FEMALE
chr1:109782548-109783286	chr1	109782548	109783286	16	10.208	Yes						FEMALE
chrX:37764043-37764582	chrX	37764043	37764582	16	10.2203	Yes	AL121578.2					FEMALE
chr7:150727974-150728517	chr7	150727974	150728517	16	10.255	Yes						FEMALE
chr16:19999112-19999899	chr16	19999112	19999899	16	10.4905	Yes						FEMALE
chr5:173017917-173018528	chr5	173017917	173018528	16	10.6239	Yes	CTB-43E15.1					FEMALE
chr11:74392542-74393165	chr11	74392542	74393165	16	10.6611	Yes						FEMALE
chr22:45326960-45327560	chr22	45326960	45327560	16	10.726	Yes						FEMALE
chr20:23341723-23343108	chr20	23341723	23343108	16	10.7874	Yes						FEMALE
chr1:214434948-214435600	chr1	214434948	214435600	16	10.7876	Yes						FEMALE
chr14:46360603-46361082	chr14	46360603	46361082	16	10.8898	Yes						FEMALE
chrX:66942743-66943243	chrX	66942743	66943243	16	10.946	Yes	AR					FEMALE
chr11:77118658-77119193	chr11	77118658	77119193	16	11.158	Yes						FEMALE
chr14:59651599-59652199	chr14	59651599	59652199	16	11.2848	Yes						FEMALE
chr10:22921814-22922658	chr10	22921814	22922658	16	11.2922	Yes						FEMALE
chr9:124479633-124480133	chr9	124479633	124480133	16	11.3983	Yes						FEMALE
chr5:36732032-36732731	chr5	36732032	36732731	16	11.5218	Yes						FEMALE
chr19:4536697-4537242	chr19	4536697	4537242	16	11.6565	Yes	CTB-50L17.14					FEMALE
chr15:61463246-61463813	chr15	61463246	61463813	16	11.7605	Yes						FEMALE
chr5:134382381-134382950	chr5	134382381	134382950	16	11.7626	Yes						FEMALE
chr17:25907422-25907884	chr17	25907422	25907884	16	11.793	Yes						FEMALE
chr20:37785216-37785855	chr20	37785216	37785855	16	11.9368	Yes						FEMALE
chr8:98020872-98021545	chr8	98020872	98021545	16	11.9739	Yes						FEMALE
chr1:26083507-26084107	chr1	26083507	26084107	16	12.0095	Yes						FEMALE
chr14:90969879-90970470	chr14	90969879	90970470	16	12.0682	Yes						FEMALE
chr9:137261699-137262423	chr9	137261699	137262423	16	12.2552	Yes						FEMALE
chr7:92237723-92238386	chr7	92237723	92238386	16	12.3217	Yes						FEMALE
chr2:97630309-97630845	chr2	97630309	97630845	16	12.6347	Yes						FEMALE
chr16:23386049-23386678	chr16	23386049	23386678	16	13.0222	Yes						FEMALE
chr9:137852315-137852882	chr9	137852315	137852882	16	13.0645	Yes						FEMALE
chrX:9974926-9975593	chrX	9974926	9975593	16	13.0803	Yes						FEMALE
chrX:66915734-66916343	chrX	66915734	66916343	16	13.2312	Yes	AR					FEMALE
chrX:153877888-153878580	chrX	153877888	153878580	16	13.3775	Yes						FEMALE
chr12:50197642-50198260	chr12	50197642	50198260	16	13.4728	Yes						FEMALE
chr4:148988635-148989229	chr4	148988635	148989229	16	13.5857	Yes						FEMALE
chr12:42628692-42629210	chr12	42628692	42629210	16	13.7546	Yes						FEMALE
chr1:9385729-9386372	chr1	9385729	9386372	16	13.9115	Yes						FEMALE
chr5:147309743-147310469	chr5	147309743	147310469	16	13.9115	Yes						FEMALE
chr11:16804996-16805542	chr11	16804996	16805542	16	14.2389	Yes						FEMALE
chr1:203285586-203286232	chr1	203285586	203286232	15	0	No						FEMALE
chr11:114030636-114031242	chr11	114030636	114031242	15	0	No						FEMALE
chr15:81041802-81042446	chr15	81041802	81042446	15	0	No						FEMALE
chr17:7959606-7960282	chr17	7959606	7960282	15	0	No						FEMALE
chr2:19005632-19006130	chr2	19005632	19006130	15	0	No						FEMALE
chr2:223890830-223891459	chr2	223890830	223891459	15	0	No						FEMALE
chr22:32971382-32971991	chr22	32971382	32971991	15	0	No						FEMALE
chr5:18048530-18049081	chr5	18048530	18049081	15	0	No						FEMALE
chr6:148666261-148666896	chr6	148666261	148666896	15	0	No						FEMALE
chr9:38022989-38023554	chr9	38022989	38023554	15	0	No						FEMALE
chr4:39540701-39541373	chr4	39540701	39541373	15	2.00742	Yes						FEMALE
chr1:45108486-45109036	chr1	45108486	45109036	15	2.02518	Yes						FEMALE
chr3:188665589-188666319	chr3	188665589	188666319	15	2.13334	Yes						FEMALE
chr15:74838446-74839090	chr15	74838446	74839090	15	2.22017	Yes						FEMALE
chr14:65693599-65694450	chr14	65693599	65694450	15	2.28413	Yes						FEMALE
chr22:21239882-21240467	chr22	21239882	21240467	15	2.28505	Yes						FEMALE
chr6:43667353-43667861	chr6	43667353	43667861	15	2.36688	Yes						FEMALE
chr17:33477995-33478446	chr17	33477995	33478446	15	2.38649	Yes						FEMALE
chr5:17306002-17306828	chr5	17306002	17306828	15	2.49263	Yes						FEMALE
chr19:2059692-2060292	chr19	2059692	2060292	15	2.57227	Yes	SCAMP4					FEMALE
chr17:41438237-41439032	chr17	41438237	41439032	15	2.61469	Yes						FEMALE
chr1:154973136-154973949	chr1	154973136	154973949	15	2.61911	Yes						FEMALE
chr16:745399-746187	chr16	745399	746187	15	2.62982	Yes						FEMALE
chr4:6918241-6918823	chr4	6918241	6918823	15	2.6401	Yes	CCDC96					FEMALE
chr7:35064919-35065725	chr7	35064919	35065725	15	2.7491	Yes						FEMALE
chr2:110316059-110316580	chr2	110316059	110316580	15	2.90662	Yes						FEMALE
chr4:37649673-37650291	chr4	37649673	37650291	15	2.92569	Yes						FEMALE
chr5:55354030-55354631	chr5	55354030	55354631	15	2.96321	Yes						FEMALE
chr13:113560164-113560853	chr13	113560164	113560853	15	3.13164	Yes						FEMALE
chr14:96549962-96550532	chr14	96549962	96550532	15	3.17782	Yes						FEMALE
chr8:118237894-118238522	chr8	118237894	118238522	15	3.25104	Yes						FEMALE
chr15:70280096-70280702	chr15	70280096	70280702	15	3.29055	Yes						FEMALE
chr19:49066392-49066869	chr19	49066392	49066869	15	3.37643	Yes						FEMALE
chr18:20493724-20494360	chr18	20493724	20494360	15	3.43679	Yes						FEMALE
chr17:57914691-57915406	chr17	57914691	57915406	15	3.44436	Yes						FEMALE
chr13:114740054-114740653	chr13	114740054	114740653	15	3.47751	Yes						FEMALE
chr8:39912121-39912835	chr8	39912121	39912835	15	3.519	Yes						FEMALE
chr11:9131496-9132058	chr11	9131496	9132058	15	3.54365	Yes	SCUBE2					FEMALE
chr15:89921337-89922197	chr15	89921337	89922197	15	3.55089	Yes						FEMALE
chr8:28657303-28658064	chr8	28657303	28658064	15	3.57887	Yes						FEMALE
chr14:96570962-96571544	chr14	96570962	96571544	15	3.72333	Yes						FEMALE
chr22:38180778-38181332	chr22	38180778	38181332	15	3.73053	Yes						FEMALE
chr16:1695900-1696605	chr16	1695900	1696605	15	3.7431	Yes	SLC9A3R2					FEMALE
chr1:223908500-223909086	chr1	223908500	223909086	15	3.8657	Yes						FEMALE
chr17:79056542-79057427	chr17	79056542	79057427	15	3.95527	Yes						FEMALE
chr16:85384548-85385051	chr16	85384548	85385051	15	4.00517	Yes						FEMALE
chr9:132535900-132536389	chr9	132535900	132536389	15	4.05556	Yes						FEMALE
chr3:42585965-42586739	chr3	42585965	42586739	15	4.08114	Yes						FEMALE
chr2:46636066-46636906	chr2	46636066	46636906	15	4.09339	Yes						FEMALE
chr11:68147746-68148258	chr11	68147746	68148258	15	4.11965	Yes						FEMALE
chr20:30799347-30799958	chr20	30799347	30799958	15	4.13156	Yes						FEMALE
chr2:201165259-201165830	chr2	201165259	201165830	15	4.14587	Yes						FEMALE
chr2:20650121-20650959	chr2	20650121	20650959	15	4.15753	Yes						FEMALE
chr2:47197782-47198332	chr2	47197782	47198332	15	4.15997	Yes						FEMALE
chr20:46420673-46421247	chr20	46420673	46421247	15	4.23252	Yes						FEMALE
chr17:65043471-65044006	chr17	65043471	65044006	15	4.26596	Yes	CACNG1					FEMALE
chr17:78004432-78005037	chr17	78004432	78005037	15	4.30135	Yes						FEMALE
chr19:2528724-2529203	chr19	2528724	2529203	15	4.30481	Yes						FEMALE
chr8:135844472-135845172	chr8	135844472	135845172	15	4.32833	Yes						FEMALE
chr3:96951315-96951949	chr3	96951315	96951949	15	4.33518	Yes						FEMALE
chr17:70395595-70396251	chr17	70395595	70396251	15	4.42604	Yes	SOX9-AS1					FEMALE
chr12:1240860-1241410	chr12	1240860	1241410	15	4.44383	Yes						FEMALE
chr13:44682464-44683064	chr13	44682464	44683064	15	4.47019	Yes						FEMALE
chr2:30750659-30751192	chr2	30750659	30751192	15	4.48803	Yes						FEMALE
chr16:20025298-20025896	chr16	20025298	20025896	15	4.50678	Yes						FEMALE
chr16:2089353-2090049	chr16	2089353	2090049	15	4.5324	Yes	SLC9A3R2					FEMALE
chr16:67495677-67496299	chr16	67495677	67496299	15	4.63795	Yes						FEMALE
chr8:144137016-144137672	chr8	144137016	144137672	15	4.63857	Yes						FEMALE
chr16:85648598-85649149	chr16	85648598	85649149	15	4.652	Yes						FEMALE
chr7:135458178-135458574	chr7	135458178	135458574	15	4.65465	Yes						FEMALE
chr2:198478104-198478719	chr2	198478104	198478719	15	4.67955	Yes						FEMALE
chr16:4310348-4310903	chr16	4310348	4310903	15	4.6956	Yes						FEMALE
chr22:31981928-31982714	chr22	31981928	31982714	15	4.7064	Yes						FEMALE
chr8:95960456-95961044	chr8	95960456	95961044	15	4.78259	Yes						FEMALE
chr1:168942100-168942699	chr1	168942100	168942699	15	4.81454	Yes						FEMALE
chr7:75719086-75719634	chr7	75719086	75719634	15	4.83944	Yes						FEMALE
chr1:212659308-212659995	chr1	212659308	212659995	15	4.90108	Yes						FEMALE
chr5:35306578-35307281	chr5	35306578	35307281	15	4.92655	Yes						FEMALE
chr13:24701214-24701671	chr13	24701214	24701671	15	4.93989	Yes						FEMALE
chr20:33113623-33114291	chr20	33113623	33114291	15	4.95776	Yes						FEMALE
chr7:131909975-131910525	chr7	131909975	131910525	15	4.95995	Yes						FEMALE
chr19:1252142-1253716	chr19	1252142	1253716	15	4.96998	Yes						FEMALE
chr18:449210-449892	chr18	449210	449892	15	5.02318	Yes						FEMALE
chr17:47472182-47472754	chr17	47472182	47472754	15	5.0249	Yes						FEMALE
chr6:37483646-37484361	chr6	37483646	37484361	15	5.11964	Yes						FEMALE
chr3:64317223-64317739	chr3	64317223	64317739	15	5.20912	Yes						FEMALE
chr12:125163860-125164533	chr12	125163860	125164533	15	5.21999	Yes						FEMALE
chr18:3710671-3711291	chr18	3710671	3711291	15	5.28267	Yes						FEMALE
chr20:20185826-20186566	chr20	20185826	20186566	15	5.29074	Yes						FEMALE
chr19:12897192-12897792	chr19	12897192	12897792	15	5.3802	Yes						FEMALE
chr1:52033307-52033786	chr1	52033307	52033786	15	5.42838	Yes						FEMALE
chr3:9939515-9940115	chr3	9939515	9940115	15	5.43175	Yes						FEMALE
chr11:70015708-70016258	chr11	70015708	70016258	15	5.52309	Yes						FEMALE
chr17:13085845-13086582	chr17	13085845	13086582	15	5.56597	Yes						FEMALE
chr1:7019486-7020048	chr1	7019486	7020048	15	5.58172	Yes						FEMALE
chr11:67080072-67080608	chr11	67080072	67080608	15	5.62457	Yes	SSH3					FEMALE
chr8:28974110-28974660	chr8	28974110	28974660	15	5.62814	Yes						FEMALE
chr20:55333740-55334326	chr20	55333740	55334326	15	5.63688	Yes						FEMALE
chr12:110777037-110777810	chr12	110777037	110777810	15	5.65772	Yes						FEMALE
chr6:135503511-135504431	chr6	135503511	135504431	15	5.6773	Yes						FEMALE
chr16:85671349-85671898	chr16	85671349	85671898	15	5.77248	Yes						FEMALE
chr9:140376515-140377083	chr9	140376515	140377083	15	5.79086	Yes						FEMALE
chr5:173193328-173193832	chr5	173193328	173193832	15	5.87801	Yes						FEMALE
chr5:28505158-28505782	chr5	28505158	28505782	15	5.89805	Yes						FEMALE
chr3:182002573-182003125	chr3	182002573	182003125	15	5.90679	Yes						FEMALE
chr16:2276249-2276953	chr16	2276249	2276953	15	5.96539	Yes	MRPS34					FEMALE
chr1:203901075-203901648	chr1	203901075	203901648	15	5.96836	Yes	CBX1P3					FEMALE
chr11:68180697-68181466	chr11	68180697	68181466	15	6.01481	Yes						FEMALE
chr1:94245158-94245786	chr1	94245158	94245786	15	6.03299	Yes						FEMALE
chr12:40285905-40286396	chr12	40285905	40286396	15	6.04767	Yes						FEMALE
chr2:170060359-170060932	chr2	170060359	170060932	15	6.06313	Yes	NOSTRIN					FEMALE
chr5:95177580-95178130	chr5	95177580	95178130	15	6.08282	Yes						FEMALE
chr3:127803165-127803815	chr3	127803165	127803815	15	6.11409	Yes						FEMALE
chr6:39237657-39238179	chr6	39237657	39238179	15	6.12986	Yes						FEMALE
chr19:35614342-35614817	chr19	35614342	35614817	15	6.17767	Yes						FEMALE
chr8:103822494-103823330	chr8	103822494	103823330	15	6.20055	Yes						FEMALE
chr14:69555293-69555812	chr14	69555293	69555812	15	6.21724	Yes						FEMALE
chr5:177507728-177508252	chr5	177507728	177508252	15	6.24148	Yes	N4BP3					FEMALE
chr22:19737332-19737867	chr22	19737332	19737867	15	6.25936	Yes						FEMALE
chr20:20552002-20552473	chr20	20552002	20552473	15	6.39026	Yes						FEMALE
chr12:52513171-52513680	chr12	52513171	52513680	15	6.40048	Yes						FEMALE
chr10:115816706-115817270	chr10	115816706	115817270	15	6.42647	Yes						FEMALE
chr4:6689714-6690397	chr4	6689714	6690397	15	6.61968	Yes						FEMALE
chr12:125004730-125005263	chr12	125004730	125005263	15	6.74078	Yes						FEMALE
chr9:140330465-140330983	chr9	140330465	140330983	15	6.82622	Yes						FEMALE
chr10:79616958-79617508	chr10	79616958	79617508	15	6.96202	Yes						FEMALE
chr1:2369307-2369886	chr1	2369307	2369886	15	7.04819	Yes						FEMALE
chr5:14008878-14009530	chr5	14008878	14009530	15	7.09082	Yes						FEMALE
chr20:60821847-60822447	chr20	60821847	60822447	15	7.09108	Yes						FEMALE
chr18:20861765-20862491	chr18	20861765	20862491	15	7.10037	Yes						FEMALE
chr19:35762292-35762842	chr19	35762292	35762842	15	7.11176	Yes						FEMALE
chr1:19752288-19752736	chr1	19752288	19752736	15	7.13026	Yes						FEMALE
chr1:21965284-21965968	chr1	21965284	21965968	15	7.14032	Yes						FEMALE
chr11:129565751-129566280	chr11	129565751	129566280	15	7.15382	Yes						FEMALE
chr21:33827800-33828419	chr21	33827800	33828419	15	7.19476	Yes						FEMALE
chr20:47280247-47280726	chr20	47280247	47280726	15	7.2322	Yes						FEMALE
chr15:77888996-77889456	chr15	77888996	77889456	15	7.23282	Yes	LINGO1					FEMALE
chr10:81024656-81025258	chr10	81024656	81025258	15	7.27695	Yes						FEMALE
chr10:79169758-79170308	chr10	79169758	79170308	15	7.30351	Yes						FEMALE
chr10:81101958-81103113	chr10	81101958	81103113	15	7.34408	Yes						FEMALE
chr1:19680857-19681486	chr1	19680857	19681486	15	7.37531	Yes						FEMALE
chr7:1494775-1495436	chr7	1494775	1495436	15	7.44525	Yes						FEMALE
chr2:237949830-237950411	chr2	237949830	237950411	15	7.45905	Yes						FEMALE
chr17:63629854-63630672	chr17	63629854	63630672	15	7.50967	Yes						FEMALE
chr1:182992836-182993448	chr1	182992836	182993448	15	7.53128	Yes						FEMALE
chr16:85786649-85787461	chr16	85786649	85787461	15	7.54314	Yes						FEMALE
chr9:33106783-33107415	chr9	33106783	33107415	15	7.59842	Yes						FEMALE
chr11:70615287-70615858	chr11	70615287	70615858	15	7.65175	Yes						FEMALE
chr12:57495560-57496080	chr12	57495560	57496080	15	7.69276	Yes						FEMALE
chr14:75614098-75614586	chr14	75614098	75614586	15	7.72321	Yes						FEMALE
chr12:107880980-107881559	chr12	107880980	107881559	15	7.74527	Yes						FEMALE
chr9:131679315-131679883	chr9	131679315	131679883	15	7.75446	Yes						FEMALE
chr3:129627089-129627646	chr3	129627089	129627646	15	7.77288	Yes						FEMALE
chr5:138483378-138484532	chr5	138483378	138484532	15	7.84545	Yes						FEMALE
chr1:201278534-201279063	chr1	201278534	201279063	15	7.87289	Yes						FEMALE
chr1:35971548-35972207	chr1	35971548	35972207	15	7.87658	Yes						FEMALE
chr14:96661432-96662248	chr14	96661432	96662248	15	7.88065	Yes						FEMALE
chr8:112126341-112126922	chr8	112126341	112126922	15	7.91592	Yes						FEMALE
chr22:25529918-25530680	chr22	25529918	25530680	15	7.92245	Yes						FEMALE
chr21:44998497-44999159	chr21	44998497	44999159	15	7.92743	Yes						FEMALE
chr5:176766128-176766732	chr5	176766128	176766732	15	7.93648	Yes						FEMALE
chr8:69765481-69766031	chr8	69765481	69766031	15	7.94512	Yes						FEMALE
chr9:33374715-33375265	chr9	33374715	33375265	15	7.95708	Yes						FEMALE
chr1:47223036-47223907	chr1	47223036	47223907	15	8.12496	Yes						FEMALE
chr8:144094622-144095212	chr8	144094622	144095212	15	8.15579	Yes						FEMALE
chr12:125215080-125215608	chr12	125215080	125215608	15	8.33565	Yes						FEMALE
chr16:85707549-85708105	chr16	85707549	85708105	15	8.35994	Yes	GSE1					FEMALE
chr6:39891111-39891623	chr6	39891111	39891623	15	8.3885	Yes						FEMALE
chr15:96880052-96880652	chr15	96880052	96880652	15	8.3948	Yes						FEMALE
chr13:41469764-41470358	chr13	41469764	41470358	15	8.43003	Yes						FEMALE
chr1:22283200-22284098	chr1	22283200	22284098	15	8.56074	Yes						FEMALE
chr20:55363336-55363869	chr20	55363336	55363869	15	8.65066	Yes						FEMALE
chr7:66658128-66658724	chr7	66658128	66658724	15	8.6792	Yes						FEMALE
chr20:49182840-49183306	chr20	49182840	49183306	15	8.72943	Yes						FEMALE
chr2:9308161-9308720	chr2	9308161	9308720	15	8.78527	Yes						FEMALE
chr3:64241335-64242023	chr3	64241335	64242023	15	8.79114	Yes						FEMALE
chr9:132249033-132249546	chr9	132249033	132249546	15	8.9536	Yes	DOLPP1					FEMALE
chr4:108974441-108975098	chr4	108974441	108975098	15	8.95522	Yes						FEMALE
chr20:36773305-36773861	chr20	36773305	36773861	15	9.07414	Yes						FEMALE
chr2:234180320-234181009	chr2	234180320	234181009	15	9.10177	Yes						FEMALE
chr13:22103515-22104164	chr13	22103515	22104164	15	9.10357	Yes						FEMALE
chr2:86181638-86182559	chr2	86181638	86182559	15	9.15758	Yes						FEMALE
chr13:52493614-52494164	chr13	52493614	52494164	15	9.17672	Yes						FEMALE
chr4:6748548-6749821	chr4	6748548	6749821	15	9.21083	Yes						FEMALE
chr22:38288776-38289332	chr22	38288776	38289332	15	9.32947	Yes						FEMALE
chr19:15599253-15600016	chr19	15599253	15600016	15	9.3542	Yes						FEMALE
chr15:70600502-70601036	chr15	70600502	70601036	15	9.38701	Yes						FEMALE
chr15:70636896-70637552	chr15	70636896	70637552	15	9.40461	Yes						FEMALE
chr5:4028528-4029532	chr5	4028528	4029532	15	9.43325	Yes						FEMALE
chr11:9069716-9070408	chr11	9069716	9070408	15	9.43667	Yes						FEMALE
chr5:172962295-172963328	chr5	172962295	172963328	15	9.46104	Yes	CTB-33O18.1					FEMALE
chr3:170052565-170053065	chr3	170052565	170053065	15	9.46313	Yes						FEMALE
chr6:110830911-110831510	chr6	110830911	110831510	15	9.46313	Yes						FEMALE
chr18:60908614-60909218	chr18	60908614	60909218	15	9.58248	Yes						FEMALE
chr17:38174508-38175506	chr17	38174508	38175506	15	9.62574	Yes						FEMALE
chr6:117866212-117866811	chr6	117866212	117866811	15	9.63672	Yes						FEMALE
chr2:109211375-109211909	chr2	109211375	109211909	15	9.63977	Yes						FEMALE
chr2:100630240-100630706	chr2	100630240	100630706	15	9.68917	Yes	AC092667.2					FEMALE
chr22:44851104-44851886	chr22	44851104	44851886	15	9.78813	Yes						FEMALE
chr2:70203016-70204254	chr2	70203016	70204254	15	9.98824	Yes						FEMALE
chr13:31648353-31648953	chr13	31648353	31648953	15	10.0165	Yes						FEMALE
chr12:132345202-132345843	chr12	132345202	132345843	15	10.0785	Yes						FEMALE
chr11:78770842-78771396	chr11	78770842	78771396	15	10.128	Yes						FEMALE
chr11:70093708-70094308	chr11	70093708	70094308	15	10.1322	Yes						FEMALE
chr1:1724736-1725386	chr1	1724736	1725386	15	10.164	Yes						FEMALE
chr2:223886000-223886480	chr2	223886000	223886480	15	10.1795	Yes						FEMALE
chr7:157413588-157414284	chr7	157413588	157414284	15	10.2771	Yes						FEMALE
chr20:49031476-49032558	chr20	49031476	49032558	15	10.2877	Yes						FEMALE
chr2:72802009-72802609	chr2	72802009	72802609	15	10.3064	Yes						FEMALE
chr1:210540136-210540707	chr1	210540136	210540707	15	10.3864	Yes						FEMALE
chr8:107636177-107636728	chr8	107636177	107636728	15	10.6139	Yes						FEMALE
chr1:16339307-16340045	chr1	16339307	16340045	15	10.683	Yes						FEMALE
chr1:55773007-55773636	chr1	55773007	55773636	15	10.7869	Yes						FEMALE
chr16:2300299-2300753	chr16	2300299	2300753	15	10.8736	Yes						FEMALE
chr9:111240944-111241751	chr9	111240944	111241751	15	11.0987	Yes						FEMALE
chr14:44367299-44367899	chr14	44367299	44367899	15	11.3354	Yes						FEMALE
chr10:92079258-92079964	chr10	92079258	92079964	15	11.372	Yes						FEMALE
chr12:14972904-14973460	chr12	14972904	14973460	15	11.4685	Yes						FEMALE
chr17:6579332-6579877	chr17	6579332	6579877	15	11.5438	Yes						FEMALE
chr1:234803800-234804400	chr1	234803800	234804400	15	11.6073	Yes						FEMALE
chr5:55257531-55258108	chr5	55257531	55258108	15	11.6565	Yes						FEMALE
chr5:14864345-14864889	chr5	14864345	14864889	15	11.9582	Yes						FEMALE
chr13:43807015-43807665	chr13	43807015	43807665	15	11.9618	Yes						FEMALE
chr10:93120514-93121164	chr10	93120514	93121164	15	11.9648	Yes						FEMALE
chr13:33919714-33920453	chr13	33919714	33920453	15	12.2111	Yes						FEMALE
chr9:116982412-116982900	chr9	116982412	116982900	15	12.2728	Yes						FEMALE
chr11:66829687-66830308	chr11	66829687	66830308	15	12.4061	Yes						FEMALE
chrX:142020790-142021294	chrX	142020790	142021294	15	12.4642	Yes						FEMALE
chr9:35193715-35194315	chr9	35193715	35194315	15	12.7371	Yes						FEMALE
chr8:134438810-134439422	chr8	134438810	134439422	15	12.8061	Yes						FEMALE
chr3:102043181-102043759	chr3	102043181	102043759	15	12.8493	Yes						FEMALE
chr17:17634209-17634782	chr17	17634209	17634782	15	12.9701	Yes						FEMALE
chr2:43103419-43104003	chr2	43103419	43104003	15	13.1747	Yes						FEMALE
chr6:44191364-44191946	chr6	44191364	44191946	15	13.3282	Yes						FEMALE
chr15:101057113-101057802	chr15	101057113	101057802	15	13.4864	Yes						FEMALE
chr13:106559103-106559714	chr13	106559103	106559714	15	13.6833	Yes						FEMALE
chr11:87634964-87635464	chr11	87634964	87635464	15	14.0676	Yes						FEMALE
chr1:149209481-149209873	chr1	149209481	149209873	15	14.2109	Yes						FEMALE
chr1:24053836-24054436	chr1	24053836	24054436	14	0	No						FEMALE
chr10:128810908-128811435	chr10	128810908	128811435	14	0	No						FEMALE
chr11:62608858-62609592	chr11	62608858	62609592	14	0	No						FEMALE
chr11:131767046-131767616	chr11	131767046	131767616	14	0	No						FEMALE
chr15:61044646-61045215	chr15	61044646	61045215	14	0	No						FEMALE
chr17:39695159-39695877	chr17	39695159	39695877	14	0	No						FEMALE
chr18:43631871-43632491	chr18	43631871	43632491	14	0	No						FEMALE
chr19:42748697-42749259	chr19	42748697	42749259	14	0	No						FEMALE
chr2:97557282-97557782	chr2	97557282	97557782	14	0	No						FEMALE
chr2:101944182-101944732	chr2	101944182	101944732	14	0	No						FEMALE
chr22:23489716-23490382	chr22	23489716	23490382	14	0	No						FEMALE
chr4:77447564-77448251	chr4	77447564	77448251	14	0	No						FEMALE
chr16:29606446-29607148	chr16	29606446	29607148	14	2.06251	Yes						FEMALE
chr14:89506976-89507936	chr14	89506976	89507936	14	2.07069	Yes						FEMALE
chr1:202349100-202349757	chr1	202349100	202349757	14	2.09102	Yes						FEMALE
chr1:155660386-155660751	chr1	155660386	155660751	14	2.10439	Yes						FEMALE
chr16:23159809-23160315	chr16	23159809	23160315	14	2.1624	Yes						FEMALE
chr7:105705374-105706073	chr7	105705374	105706073	14	2.18603	Yes						FEMALE
chr3:177138169-177138923	chr3	177138169	177138923	14	2.35734	Yes						FEMALE
chr18:20911041-20911641	chr18	20911041	20911641	14	2.38334	Yes						FEMALE
chr3:52505339-52505967	chr3	52505339	52505967	14	2.39309	Yes						FEMALE
chr17:8057482-8058134	chr17	8057482	8058134	14	2.48014	Yes						FEMALE
chr11:7618816-7619347	chr11	7618816	7619347	14	2.50576	Yes						FEMALE
chr16:80647744-80648349	chr16	80647744	80648349	14	2.53137	Yes	DYNLRB2	rs9938021:80648048:C:G	C	G	0.0814	FEMALE
chr15:69884129-69884752	chr15	69884129	69884752	14	2.54133	Yes						FEMALE
chr2:65536720-65537282	chr2	65536720	65537282	14	2.59122	Yes						FEMALE
chr6:35569281-35570096	chr6	35569281	35570096	14	2.62284	Yes						FEMALE
chr2:129063732-129064259	chr2	129063732	129064259	14	2.69021	Yes						FEMALE
chr17:39933706-39934455	chr17	39933706	39934455	14	2.76738	Yes						FEMALE
chr10:5595904-5596813	chr10	5595904	5596813	14	2.78696	Yes						FEMALE
chr1:145216845-145217398	chr1	145216845	145217398	14	2.82962	Yes						FEMALE
chr17:66435956-66436556	chr17	66435956	66436556	14	2.83723	Yes	ARSG					FEMALE
chr1:202003857-202004394	chr1	202003857	202004394	14	2.84012	Yes						FEMALE
chr16:11600130-11600599	chr16	11600130	11600599	14	2.8825	Yes						FEMALE
chr1:202055958-202056586	chr1	202055958	202056586	14	2.9232	Yes						FEMALE
chr7:112121723-112122378	chr7	112121723	112122378	14	2.94135	Yes						FEMALE
chr6:42013196-42013890	chr6	42013196	42013890	14	2.9833	Yes						FEMALE
chr19:8523192-8523747	chr19	8523192	8523747	14	3.02878	Yes						FEMALE
chr21:43540050-43540819	chr21	43540050	43540819	14	3.09575	Yes						FEMALE
chr12:96111646-96112504	chr12	96111646	96112504	14	3.11144	Yes						FEMALE
chr19:1402642-1403197	chr19	1402642	1403197	14	3.2744	Yes	REEP6					FEMALE
chr20:16508697-16509273	chr20	16508697	16509273	14	3.28661	Yes						FEMALE
chr10:32649150-32649608	chr10	32649150	32649608	14	3.29497	Yes						FEMALE
chr21:36062700-36063245	chr21	36062700	36063245	14	3.36592	Yes						FEMALE
chr18:3623964-3624541	chr18	3623964	3624541	14	3.38395	Yes						FEMALE
chr2:20668699-20669382	chr2	20668699	20669382	14	3.45843	Yes						FEMALE
chr12:123372760-123373530	chr12	123372760	123373530	14	3.49531	Yes						FEMALE
chr17:71201582-71202132	chr17	71201582	71202132	14	3.50039	Yes						FEMALE
chr20:32384258-32384897	chr20	32384258	32384897	14	3.56421	Yes						FEMALE
chr1:201139600-201140558	chr1	201139600	201140558	14	3.6456	Yes						FEMALE
chr17:38255191-38255856	chr17	38255191	38255856	14	3.65357	Yes						FEMALE
chr2:8640568-8641232	chr2	8640568	8641232	14	3.73886	Yes						FEMALE
chr3:129231399-129232039	chr3	129231399	129232039	14	3.74873	Yes						FEMALE
chr4:8424041-8424636	chr4	8424041	8424636	14	3.75407	Yes						FEMALE
chr20:32378336-32378765	chr20	32378336	32378765	14	3.75991	Yes						FEMALE
chr1:3585286-3585836	chr1	3585286	3585836	14	3.79782	Yes						FEMALE
chr5:56110928-56111684	chr5	56110928	56111684	14	3.82814	Yes		rs72758040:56110937:G:A	G	A	0.1563	FEMALE
chr19:5046103-5047042	chr19	5046103	5047042	14	3.94856	Yes						FEMALE
chr6:37441111-37441704	chr6	37441111	37441704	14	3.96755	Yes						FEMALE
chr14:67907126-67907712	chr14	67907126	67907712	14	4.00517	Yes						FEMALE
chr19:45381647-45382217	chr19	45381647	45382217	14	4.03125	Yes						FEMALE
chr16:87823311-87823999	chr16	87823311	87823999	14	4.03667	Yes						FEMALE
chr3:192569569-192570239	chr3	192569569	192570239	14	4.03753	Yes						FEMALE
chr7:141394425-141394888	chr7	141394425	141394888	14	4.04629	Yes						FEMALE
chr10:80095320-80096058	chr10	80095320	80096058	14	4.06407	Yes						FEMALE
chr3:40732575-40733315	chr3	40732575	40733315	14	4.06636	Yes						FEMALE
chr10:80886758-80887325	chr10	80886758	80887325	14	4.09471	Yes		rs4980030:80886835:T:C	T	C	0.0752	FEMALE
chr12:13288580-13289230	chr12	13288580	13289230	14	4.09824	Yes						FEMALE
chr5:168018980-168019482	chr5	168018980	168019482	14	4.11505	Yes						FEMALE
chr6:34514500-34515161	chr6	34514500	34515161	14	4.17347	Yes						FEMALE
chr19:2484142-2484642	chr19	2484142	2484642	14	4.2216	Yes						FEMALE
chr14:61993149-61993962	chr14	61993149	61993962	14	4.22165	Yes						FEMALE
chr8:81665210-81665891	chr8	81665210	81665891	14	4.22405	Yes						FEMALE
chr8:135755944-135756472	chr8	135755944	135756472	14	4.24029	Yes						FEMALE
chr14:77500229-77500899	chr14	77500229	77500899	14	4.24682	Yes						FEMALE
chr10:99096708-99097475	chr10	99096708	99097475	14	4.26256	Yes						FEMALE
chr16:16115798-16116349	chr16	16115798	16116349	14	4.26881	Yes						FEMALE
chr12:120672480-120673030	chr12	120672480	120673030	14	4.3017	Yes	DYNLL1-AS1					FEMALE
chr17:57929099-57929787	chr17	57929099	57929787	14	4.33651	Yes						FEMALE
chr10:384308-385270	chr10	384308	385270	14	4.36298	Yes						FEMALE
chr13:89600740-89601271	chr13	89600740	89601271	14	4.37779	Yes						FEMALE
chr7:17029376-17030073	chr7	17029376	17030073	14	4.38691	Yes						FEMALE
chr1:180126586-180127463	chr1	180126586	180127463	14	4.39859	Yes						FEMALE
chr16:89449406-89449898	chr16	89449406	89449898	14	4.4313	Yes						FEMALE
chr1:15611257-15611898	chr1	15611257	15611898	14	4.47348	Yes						FEMALE
chr3:39182615-39183623	chr3	39182615	39183623	14	4.49928	Yes						FEMALE
chr16:9458949-9459555	chr16	9458949	9459555	14	4.5027	Yes						FEMALE
chr7:106810125-106810676	chr7	106810125	106810676	14	4.53716	Yes						FEMALE
chr8:125503372-125503972	chr8	125503372	125503972	14	4.57279	Yes						FEMALE
chr2:86299411-86300032	chr2	86299411	86300032	14	4.57777	Yes						FEMALE
chr10:95225550-95226558	chr10	95225550	95226558	14	4.64447	Yes						FEMALE
chr1:55480736-55481357	chr1	55480736	55481357	14	4.67024	Yes						FEMALE
chr1:208242348-208242986	chr1	208242348	208242986	14	4.72648	Yes						FEMALE
chr16:54459554-54460361	chr16	54459554	54460361	14	4.7732	Yes						FEMALE
chr6:38760054-38760596	chr6	38760054	38760596	14	4.78746	Yes						FEMALE
chr22:25290366-25291036	chr22	25290366	25291036	14	4.80746	Yes						FEMALE
chr13:111179653-111180265	chr13	111179653	111180265	14	4.85961	Yes						FEMALE
chr9:87404131-87404750	chr9	87404131	87404750	14	4.88734	Yes						FEMALE
chr9:74398033-74398612	chr9	74398033	74398612	14	4.96509	Yes						FEMALE
chr22:33936182-33936832	chr22	33936182	33936832	14	4.97097	Yes						FEMALE
chr14:52001282-52001870	chr14	52001282	52001870	14	4.98027	Yes						FEMALE
chr17:29825356-29825882	chr17	29825356	29825882	14	4.98258	Yes						FEMALE
chr15:72447496-72448102	chr15	72447496	72448102	14	4.98826	Yes						FEMALE
chr5:139035228-139035828	chr5	139035228	139035828	14	5.02108	Yes	CXXC5					FEMALE
chr12:125412560-125413330	chr12	125412560	125413330	14	5.04903	Yes						FEMALE
chr11:20057266-20058285	chr11	20057266	20058285	14	5.06212	Yes						FEMALE
chr8:69611503-69612122	chr8	69611503	69612122	14	5.07683	Yes						FEMALE
chr7:47445375-47446075	chr7	47445375	47446075	14	5.14153	Yes						FEMALE
chr1:202025956-202026658	chr1	202025956	202026658	14	5.15953	Yes						FEMALE
chr1:49147031-49147536	chr1	49147031	49147536	14	5.18657	Yes						FEMALE
chr2:134431782-134432570	chr2	134431782	134432570	14	5.20998	Yes						FEMALE
chr17:57863782-57864391	chr17	57863782	57864391	14	5.21241	Yes						FEMALE
chr9:82104384-82105008	chr9	82104384	82105008	14	5.21645	Yes						FEMALE
chr21:36116069-36116647	chr21	36116069	36116647	14	5.22787	Yes						FEMALE
chr12:6723004-6723610	chr12	6723004	6723610	14	5.24561	Yes						FEMALE
chr6:4358728-4359404	chr6	4358728	4359404	14	5.24888	Yes						FEMALE
chr20:61283397-61284166	chr20	61283397	61284166	14	5.25443	Yes						FEMALE
chr2:186051982-186052582	chr2	186051982	186052582	14	5.28548	Yes						FEMALE
chr1:108741813-108742232	chr1	108741813	108742232	14	5.30509	Yes						FEMALE
chr19:3429592-3430197	chr19	3429592	3430197	14	5.3063	Yes						FEMALE
chr18:8625591-8626110	chr18	8625591	8626110	14	5.34854	Yes						FEMALE
chr17:72391132-72391906	chr17	72391132	72391906	14	5.40207	Yes	GPRC5C					FEMALE
chr3:193859046-193860161	chr3	193859046	193860161	14	5.43652	Yes						FEMALE
chr19:48014392-48014892	chr19	48014392	48014892	14	5.46515	Yes						FEMALE
chr14:77506432-77507099	chr14	77506432	77507099	14	5.48409	Yes						FEMALE
chr10:61791220-61791769	chr10	61791220	61791769	14	5.52123	Yes						FEMALE
chr15:93157452-93158059	chr15	93157452	93158059	14	5.5784	Yes						FEMALE
chr2:204443756-204444282	chr2	204443756	204444282	14	5.60077	Yes						FEMALE
chr4:146254863-146255523	chr4	146254863	146255523	14	5.60525	Yes						FEMALE
chr19:38781292-38781974	chr19	38781292	38781974	14	5.61374	Yes						FEMALE
chr14:67909132-67909638	chr14	67909132	67909638	14	5.65596	Yes						FEMALE
chr2:3226332-3227124	chr2	3226332	3227124	14	5.66637	Yes						FEMALE
chr14:91630982-91631532	chr14	91630982	91631532	14	5.67921	Yes						FEMALE
chr1:68084144-68084807	chr1	68084144	68084807	14	5.68116	Yes						FEMALE
chr11:17791408-17792016	chr11	17791408	17792016	14	5.81688	Yes	KCNJ11					FEMALE
chr6:168596996-168597611	chr6	168596996	168597611	14	5.86237	Yes						FEMALE
chr19:3403853-3404742	chr19	3403853	3404742	14	5.89783	Yes	NFIC					FEMALE
chr3:53553210-53553789	chr3	53553210	53553789	14	5.91827	Yes						FEMALE
chr17:46025932-46026606	chr17	46025932	46026606	14	5.91939	Yes	PRR15L					FEMALE
chr10:566313-566820	chr10	566313	566820	14	5.93356	Yes						FEMALE
chr19:10597197-10597753	chr19	10597197	10597753	14	5.97305	Yes						FEMALE
chr10:5698551-5699070	chr10	5698551	5699070	14	5.9871	Yes						FEMALE
chr2:134262219-134263109	chr2	134262219	134263109	14	6.04233	Yes						FEMALE
chr11:70079492-70080158	chr11	70079492	70080158	14	6.05091	Yes						FEMALE
chr15:39566096-39566743	chr15	39566096	39566743	14	6.09181	Yes						FEMALE
chr19:3708242-3708997	chr19	3708242	3708997	14	6.1063	Yes						FEMALE
chr22:38614482-38615063	chr22	38614482	38615063	14	6.15081	Yes						FEMALE
chr1:46648736-46649436	chr1	46648736	46649436	14	6.172	Yes						FEMALE
chr8:103820394-103820956	chr8	103820394	103820956	14	6.21825	Yes						FEMALE
chr11:38482342-38482897	chr11	38482342	38482897	14	6.23417	Yes						FEMALE
chr15:58624313-58624902	chr15	58624313	58624902	14	6.2485	Yes						FEMALE
chr20:30783273-30783873	chr20	30783273	30783873	14	6.25634	Yes						FEMALE
chr8:74060203-74060776	chr8	74060203	74060776	14	6.27915	Yes						FEMALE
chr1:223894948-223895900	chr1	223894948	223895900	14	6.34671	Yes						FEMALE
chr7:109921323-109921874	chr7	109921323	109921874	14	6.3744	Yes						FEMALE
chr8:101429081-101430022	chr8	101429081	101430022	14	6.38504	Yes						FEMALE
chr8:11331610-11332160	chr8	11331610	11332160	14	6.43108	Yes						FEMALE
chr20:47213841-47214487	chr20	47213841	47214487	14	6.44501	Yes						FEMALE
chr19:34254794-34255424	chr19	34254794	34255424	14	6.44926	Yes						FEMALE
chr7:1598523-1599086	chr7	1598523	1599086	14	6.52088	Yes						FEMALE
chr1:232122634-232123400	chr1	232122634	232123400	14	6.53892	Yes						FEMALE
chr7:75939524-75940312	chr7	75939524	75940312	14	6.55339	Yes						FEMALE
chr1:118105194-118106086	chr1	118105194	118106086	14	6.5779	Yes						FEMALE
chrX:100235344-100236343	chrX	100235344	100236343	14	6.65227	Yes						FEMALE
chr15:70577005-70577702	chr15	70577005	70577702	14	6.69153	Yes						FEMALE
chr1:28640486-28640964	chr1	28640486	28640964	14	6.7047	Yes						FEMALE
chr5:102780033-102780580	chr5	102780033	102780580	14	6.70714	Yes						FEMALE
chr1:1368440-1369098	chr1	1368440	1369098	14	6.73559	Yes						FEMALE
chr20:37780740-37781276	chr20	37780740	37781276	14	6.73861	Yes						FEMALE
chr17:40819622-40820406	chr17	40819622	40820406	14	6.78438	Yes						FEMALE
[truncated: 72,440 more rows]
