# Supplementary material for: Estrogen receptor 1 chromatin profiling in human breast tumors reveals high inter-patient heterogeneity with enrichment of risk SNPs and enhancer activity at most-conserved regions
Source: HighWire-hosted journal article supplement (doi:10.1101/gr.278680.123), 2024-05-06
Supplement: Supplemental_Table_S3.xlsx [file Supplemental_Table_S3.xlsx]

## Sheet: Supplemental_Table_S3
Supplemental Table S3 | Ranking of all distal ESR1 peaks found in male patients
Unique_indetifier	Chr	Start	End	Tally_enh	SNP_ID	SNP_strongest_pval
chr1:7507755-7508385	chr1	7507755	7508385	30	NA	NA
chr1:31841457-31842151	chr1	31841457	31842151	30	NA	NA
chr10:127313260-127313894	chr10	127313260	127313894	30	NA	NA
chr11:17427129-17427795	chr11	17427129	17427795	30	NA	NA
chr11:101312329-101312983	chr11	101312329	101312983	30	NA	NA
chr12:2904942-2905607	chr12	2904942	2905607	30	NA	NA
chr12:116828057-116828825	chr12	116828057	116828825	30	NA	NA
chr12:124853942-124854913	chr12	124853942	124854913	30	NA	NA
chr12:124877405-124878076	chr12	124877405	124878076	30	NA	NA
chr14:50459488-50460148	chr14	50459488	50460148	30	NA	NA
chr14:93483616-93484251	chr14	93483616	93484251	30	NA	NA
chr15:64188880-64189590	chr15	64188880	64189590	30	NA	NA
chr15:69886703-69887368	chr15	69886703	69887368	30	NA	NA
chr16:9141344-9142044	chr16	9141344	9142044	30	NA	NA
chr17:38478382-38479091	chr17	38478382	38479091	30	NA	NA
chr17:38604791-38605441	chr17	38604791	38605441	30	NA	NA
chr17:55976970-55977664	chr17	55976970	55977664	30	NA	NA
chr17:56716891-56717559	chr17	56716891	56717559	30	NA	NA
chr19:1181487-1182193	chr19	1181487	1182193	30	NA	NA
chr19:41426880-41427694	chr19	41426880	41427694	30	NA	NA
chr2:28600024-28600748	chr2	28600024	28600748	30	NA	NA
chr2:65527184-65527838	chr2	65527184	65527838	30	NA	NA
chr2:130997053-130997761	chr2	130997053	130997761	30	NA	NA
chr2:238467534-238468232	chr2	238467534	238468232	30	NA	NA
chr3:188816699-188817366	chr3	188816699	188817366	30	NA	NA
chr5:131714146-131714814	chr5	131714146	131714814	30	NA	NA
chr5:139088492-139089379	chr5	139088492	139089379	30	NA	NA
chr6:157148261-157148926	chr6	157148261	157148926	30	NA	NA
chr7:4722886-4723593	chr7	4722886	4723593	30	NA	NA
chr8:37002226-37002886	chr8	37002226	37002886	30	NA	NA
chr8:116879444-116880211	chr8	116879444	116880211	30	NA	NA
chr8:129154011-129154725	chr8	129154011	129154725	30	NA	NA
chr9:95380846-95381531	chr9	95380846	95381531	30	NA	NA
chr9:138284233-138284853	chr9	138284233	138284853	30	NA	NA
chr22:29209633-29210262	chr22	29209633	29210262	29	rs28448648:29210154:G:C	1.708e-10
chr8:129165218-129165833	chr8	129165218	129165833	29	rs759646:129165269:G:A	3.552e-09
chr1:1008967-1009703	chr1	1008967	1009703	29	NA	NA
chr1:16934703-16935332	chr1	16934703	16935332	29	NA	NA
chr1:30934421-30935085	chr1	30934421	30935085	29	NA	NA
chr1:154162905-154163517	chr1	154162905	154163517	29	NA	NA
chr1:203058203-203059031	chr1	203058203	203059031	29	NA	NA
chr1:209719655-209720305	chr1	209719655	209720305	29	NA	NA
chr10:5701804-5702564	chr10	5701804	5702564	29	NA	NA
chr10:12192097-12192744	chr10	12192097	12192744	29	NA	NA
chr10:51547197-51547894	chr10	51547197	51547894	29	NA	NA
chr10:106240561-106241264	chr10	106240561	106241264	29	NA	NA
chr10:115681624-115682244	chr10	115681624	115682244	29	NA	NA
chr11:65185917-65186756	chr11	65185917	65186756	29	NA	NA
chr11:100904629-100905331	chr11	100904629	100905331	29	NA	NA
chr12:124844186-124845255	chr12	124844186	124845255	29	NA	NA
chr13:34216718-34217397	chr13	34216718	34217397	29	NA	NA
chr14:35872894-35873548	chr14	35872894	35873548	29	NA	NA
chr14:74223166-74223781	chr14	74223166	74223781	29	NA	NA
chr15:31733049-31733733	chr15	31733049	31733733	29	NA	NA
chr15:39960555-39961186	chr15	39960555	39961186	29	NA	NA
chr15:71388830-71389482	chr15	71388830	71389482	29	NA	NA
chr15:71396918-71397582	chr15	71396918	71397582	29	NA	NA
chr15:74002353-74003030	chr15	74002353	74003030	29	NA	NA
chr16:1428772-1429487	chr16	1428772	1429487	29	NA	NA
chr16:14463944-14464622	chr16	14463944	14464622	29	NA	NA
chr16:31142014-31142687	chr16	31142014	31142687	29	NA	NA
chr16:83980349-83981001	chr16	83980349	83981001	29	NA	NA
chr16:85339594-85340222	chr16	85339594	85340222	29	NA	NA
chr16:85499503-85500151	chr16	85499503	85500151	29	NA	NA
chr16:88829751-88830422	chr16	88829751	88830422	29	NA	NA
chr17:17686319-17686963	chr17	17686319	17686963	29	NA	NA
chr17:38738409-38739078	chr17	38738409	38739078	29	NA	NA
chr17:39692119-39692713	chr17	39692119	39692713	29	NA	NA
chr17:40779941-40780617	chr17	40779941	40780617	29	NA	NA
chr17:43978351-43978994	chr17	43978351	43978994	29	NA	NA
chr17:80061688-80062328	chr17	80061688	80062328	29	NA	NA
chr18:20837601-20838301	chr18	20837601	20838301	29	NA	NA
chr18:24325205-24325861	chr18	24325205	24325861	29	NA	NA
chr19:3389851-3390498	chr19	3389851	3390498	29	NA	NA
chr19:4970671-4971284	chr19	4970671	4971284	29	NA	NA
chr19:4976287-4977028	chr19	4976287	4977028	29	NA	NA
chr19:16574528-16575289	chr19	16574528	16575289	29	NA	NA
chr19:39900032-39900724	chr19	39900032	39900724	29	NA	NA
chr2:1680034-1680634	chr2	1680034	1680634	29	NA	NA
chr2:1696197-1696894	chr2	1696197	1696894	29	NA	NA
chr2:11638547-11639203	chr2	11638547	11639203	29	NA	NA
chr2:45979582-45980197	chr2	45979582	45980197	29	NA	NA
chr2:100252994-100253647	chr2	100252994	100253647	29	NA	NA
chr2:173138682-173139344	chr2	173138682	173139344	29	NA	NA
chr2:216847155-216847803	chr2	216847155	216847803	29	NA	NA
chr20:20421793-20422405	chr20	20421793	20422405	29	NA	NA
chr20:35215414-35216147	chr20	35215414	35216147	29	NA	NA
chr20:43393937-43394790	chr20	43393937	43394790	29	NA	NA
chr21:36100676-36101327	chr21	36100676	36101327	29	NA	NA
chr21:36106876-36107506	chr21	36106876	36107506	29	NA	NA
chr22:25796703-25797336	chr22	25796703	25797336	29	NA	NA
chr22:29913262-29913983	chr22	29913262	29913983	29	NA	NA
chr22:37966077-37966753	chr22	37966077	37966753	29	NA	NA
chr22:39688677-39689303	chr22	39688677	39689303	29	NA	NA
chr22:46887736-46888350	chr22	46887736	46888350	29	NA	NA
chr3:13517523-13518168	chr3	13517523	13518168	29	NA	NA
chr3:43255988-43256672	chr3	43255988	43256672	29	NA	NA
chr3:50188132-50188846	chr3	50188132	50188846	29	NA	NA
chr3:58452778-58453439	chr3	58452778	58453439	29	NA	NA
chr3:71159874-71160589	chr3	71159874	71160589	29	NA	NA
chr3:150474166-150474889	chr3	150474166	150474889	29	NA	NA
chr3:156260039-156260833	chr3	156260039	156260833	29	NA	NA
chr4:3829155-3829861	chr4	3829155	3829861	29	NA	NA
chr4:77491155-77491790	chr4	77491155	77491790	29	NA	NA
chr5:133801958-133802614	chr5	133801958	133802614	29	NA	NA
chr5:154448079-154448758	chr5	154448079	154448758	29	NA	NA
chr5:173910314-173910946	chr5	173910314	173910946	29	NA	NA
chr6:36086063-36086724	chr6	36086063	36086724	29	NA	NA
chr6:44077924-44078533	chr6	44077924	44078533	29	NA	NA
chr6:120462713-120463418	chr6	120462713	120463418	29	NA	NA
chr6:167533713-167534331	chr6	167533713	167534331	29	NA	NA
chr6:168791359-168792026	chr6	168791359	168792026	29	NA	NA
chr7:906636-907341	chr7	906636	907341	29	NA	NA
chr7:34076436-34077137	chr7	34076436	34077137	29	NA	NA
chr7:75936236-75936891	chr7	75936236	75936891	29	NA	NA
chr8:67434476-67435186	chr8	67434476	67435186	29	NA	NA
chr8:102527626-102528234	chr8	102527626	102528234	29	NA	NA
chr8:128882620-128883333	chr8	128882620	128883333	29	NA	NA
chr9:33221146-33221776	chr9	33221146	33221776	29	NA	NA
chr9:130784391-130785026	chr9	130784391	130785026	29	NA	NA
chr10:80853547-80854263	chr10	80853547	80854263	28	rs753271:80853575:A:G	8.147e-13
chr11:69329983-69330645	chr11	69329983	69330645	28	rs640822:69330090:C:T	3.613e-21
chr2:217957194-217957905	chr2	217957194	217957905	28	rs199804270:217957405:GA:G	3.326e-35
chr8:102478786-102479515	chr8	102478786	102479515	28	rs515126:102478834:A:T	1.041e-08
chr1:1014733-1016004	chr1	1014733	1016004	28	NA	NA
chr1:8319032-8320004	chr1	8319032	8320004	28	NA	NA
chr1:12609551-12610205	chr1	12609551	12610205	28	NA	NA
chr1:21578304-21578962	chr1	21578304	21578962	28	NA	NA
chr1:31659362-31660070	chr1	31659362	31660070	28	NA	NA
chr1:42331801-42332454	chr1	42331801	42332454	28	NA	NA
chr1:61681251-61681926	chr1	61681251	61681926	28	NA	NA
chr1:71914151-71914855	chr1	71914151	71914855	28	NA	NA
chr1:85225153-85225917	chr1	85225153	85225917	28	NA	NA
chr1:113256051-113256617	chr1	113256051	113256617	28	NA	NA
chr1:178694833-178695604	chr1	178694833	178695604	28	NA	NA
chr10:6339763-6340425	chr10	6339763	6340425	28	NA	NA
chr10:62608054-62608844	chr10	62608054	62608844	28	NA	NA
chr10:71199011-71199575	chr10	71199011	71199575	28	NA	NA
chr10:79649036-79649651	chr10	79649036	79649651	28	NA	NA
chr10:95194694-95195374	chr10	95194694	95195374	28	NA	NA
chr10:112582294-112583007	chr10	112582294	112583007	28	NA	NA
chr10:117424111-117424736	chr10	117424111	117424736	28	NA	NA
chr10:128606804-128607468	chr10	128606804	128607468	28	NA	NA
chr10:129127230-129127920	chr10	129127230	129127920	28	NA	NA
chr11:1817669-1818317	chr11	1817669	1818317	28	NA	NA
chr11:3443384-3444329	chr11	3443384	3444329	28	NA	NA
chr11:12269917-12270517	chr11	12269917	12270517	28	NA	NA
chr11:15515444-15516066	chr11	15515444	15516066	28	NA	NA
chr11:35387328-35387981	chr11	35387328	35387981	28	NA	NA
chr11:35411331-35411926	chr11	35411331	35411926	28	NA	NA
chr11:69706219-69706895	chr11	69706219	69706895	28	NA	NA
chr11:70651879-70652495	chr11	70651879	70652495	28	NA	NA
chr11:72497395-72497983	chr11	72497395	72497983	28	NA	NA
chr12:2041260-2041926	chr12	2041260	2041926	28	NA	NA
chr12:46887408-46888110	chr12	46887408	46888110	28	NA	NA
chr12:53551575-53552258	chr12	53551575	53552258	28	NA	NA
chr12:89858592-89859275	chr12	89858592	89859275	28	NA	NA
chr12:116307855-116308525	chr12	116307855	116308525	28	NA	NA
chr12:122186605-122187275	chr12	122186605	122187275	28	NA	NA
chr12:124850025-124850806	chr12	124850025	124850806	28	NA	NA
chr13:98945322-98945982	chr13	98945322	98945982	28	NA	NA
chr13:99068529-99069179	chr13	99068529	99069179	28	NA	NA
chr14:67946655-67947301	chr14	67946655	67947301	28	NA	NA
chr15:40347207-40347868	chr15	40347207	40347868	28	NA	NA
chr15:63679790-63680457	chr15	63679790	63680457	28	NA	NA
chr15:90371182-90372180	chr15	90371182	90372180	28	NA	NA
chr16:4202159-4202872	chr16	4202159	4202872	28	NA	NA
chr16:8772871-8773599	chr16	8772871	8773599	28	NA	NA
chr16:53133396-53134087	chr16	53133396	53134087	28	NA	NA
chr16:70170422-70171054	chr16	70170422	70171054	28	NA	NA
chr16:85355394-85356059	chr16	85355394	85356059	28	NA	NA
chr16:85554387-85555001	chr16	85554387	85555001	28	NA	NA
chr17:1849018-1849763	chr17	1849018	1849763	28	NA	NA
chr17:25574319-25574936	chr17	25574319	25574936	28	NA	NA
chr17:38336863-38337494	chr17	38336863	38337494	28	NA	NA
chr17:38470563-38471260	chr17	38470563	38471260	28	NA	NA
chr17:38487864-38488970	chr17	38487864	38488970	28	NA	NA
chr17:49021591-49022332	chr17	49021591	49022332	28	NA	NA
chr17:80071783-80072401	chr17	80071783	80072401	28	NA	NA
chr17:80846853-80847782	chr17	80846853	80847782	28	NA	NA
chr18:18909998-18910651	chr18	18909998	18910651	28	NA	NA
chr19:1170073-1170787	chr19	1170073	1170787	28	NA	NA
chr19:2168771-2169417	chr19	2168771	2169417	28	NA	NA
chr19:2579037-2579687	chr19	2579037	2579687	28	NA	NA
chr19:4991534-4992394	chr19	4991534	4992394	28	NA	NA
chr19:16320937-16321548	chr19	16320937	16321548	28	NA	NA
chr19:18557667-18558348	chr19	18557667	18558348	28	NA	NA
chr19:38812037-38812744	chr19	38812037	38812744	28	NA	NA
chr19:39204971-39205621	chr19	39204971	39205621	28	NA	NA
chr19:45245030-45245771	chr19	45245030	45245771	28	NA	NA
chr2:7171805-7172498	chr2	7171805	7172498	28	NA	NA
chr2:26980732-26981347	chr2	26980732	26981347	28	NA	NA
chr2:70843253-70843897	chr2	70843253	70843897	28	NA	NA
chr2:106139044-106139683	chr2	106139044	106139683	28	NA	NA
chr2:132191747-132192444	chr2	132191747	132192444	28	NA	NA
chr2:190406094-190406801	chr2	190406094	190406801	28	NA	NA
chr2:212287653-212288331	chr2	212287653	212288331	28	NA	NA
chr2:238143855-238144533	chr2	238143855	238144533	28	NA	NA
chr20:46786643-46787262	chr20	46786643	46787262	28	NA	NA
chr21:38936919-38937606	chr21	38936919	38937606	28	NA	NA
chr22:38618686-38619330	chr22	38618686	38619330	28	NA	NA
chr3:13153615-13154196	chr3	13153615	13154196	28	NA	NA
chr3:50164364-50165236	chr3	50164364	50165236	28	NA	NA
chr3:129690082-129690749	chr3	129690082	129690749	28	NA	NA
chr3:168608628-168609265	chr3	168608628	168609265	28	NA	NA
chr4:782555-783255	chr4	782555	783255	28	NA	NA
chr4:3113136-3113771	chr4	3113136	3113771	28	NA	NA
chr4:89255971-89256704	chr4	89255971	89256704	28	NA	NA
chr4:105829052-105829705	chr4	105829052	105829705	28	NA	NA
chr4:139831411-139832513	chr4	139831411	139832513	28	NA	NA
chr5:55325607-55326242	chr5	55325607	55326242	28	NA	NA
chr5:78489400-78490058	chr5	78489400	78490058	28	NA	NA
chr5:132584950-132585642	chr5	132584950	132585642	28	NA	NA
chr5:167780164-167780942	chr5	167780164	167780942	28	NA	NA
chr6:1641427-1642028	chr6	1641427	1642028	28	NA	NA
chr6:30719240-30719838	chr6	30719240	30719838	28	NA	NA
chr6:43772227-43772883	chr6	43772227	43772883	28	NA	NA
chr6:135532226-135532886	chr6	135532226	135532886	28	NA	NA
chr6:168151570-168152140	chr6	168151570	168152140	28	NA	NA
chr7:2563522-2564243	chr7	2563522	2564243	28	NA	NA
chr7:151391837-151392443	chr7	151391837	151392443	28	NA	NA
chr8:33102436-33103136	chr8	33102436	33103136	28	NA	NA
chr8:41416786-41417465	chr8	41416786	41417465	28	NA	NA
chr8:67626076-67626771	chr8	67626076	67626771	28	NA	NA
chr8:69766570-69767184	chr8	69766570	69767184	28	NA	NA
chr8:98776334-98777038	chr8	98776334	98777038	28	NA	NA
chr8:103612900-103613838	chr8	103612900	103613838	28	NA	NA
chr9:91144741-91145452	chr9	91144741	91145452	28	NA	NA
chr9:95750647-95751253	chr9	95750647	95751253	28	NA	NA
chr9:126089991-126090591	chr9	126089991	126090591	28	NA	NA
chr9:130788999-130789633	chr9	130788999	130789633	28	NA	NA
chr9:130809423-130810049	chr9	130809423	130810049	28	NA	NA
chr1:12660253-12660917	chr1	12660253	12660917	27	NA	NA
chr1:21594831-21595504	chr1	21594831	21595504	27	NA	NA
chr1:30775651-30776417	chr1	30775651	30776417	27	NA	NA
chr1:32296104-32296785	chr1	32296104	32296785	27	NA	NA
chr1:32308391-32309004	chr1	32308391	32309004	27	NA	NA
chr1:36795217-36795856	chr1	36795217	36795856	27	NA	NA
chr1:37504053-37504705	chr1	37504053	37504705	27	NA	NA
chr1:41389153-41389805	chr1	41389153	41389805	27	NA	NA
chr1:43457951-43458573	chr1	43457951	43458573	27	NA	NA
chr1:51786951-51787612	chr1	51786951	51787612	27	NA	NA
chr1:85763405-85764104	chr1	85763405	85764104	27	NA	NA
chr1:109694785-109695305	chr1	109694785	109695305	27	NA	NA
chr1:109788707-109789317	chr1	109788707	109789317	27	NA	NA
chr1:161053203-161053762	chr1	161053203	161053762	27	NA	NA
chr1:162129101-162129705	chr1	162129101	162129705	27	NA	NA
chr1:172715404-172716053	chr1	172715404	172716053	27	NA	NA
chr1:184595704-184596323	chr1	184595704	184596323	27	NA	NA
chr1:201566881-201567583	chr1	201566881	201567583	27	NA	NA
chr1:201987653-201988454	chr1	201987653	201988454	27	NA	NA
chr1:211694683-211695335	chr1	211694683	211695335	27	NA	NA
chr10:406676-407714	chr10	406676	407714	27	NA	NA
chr10:17487414-17488194	chr10	17487414	17488194	27	NA	NA
chr10:112867382-112868111	chr10	112867382	112868111	27	NA	NA
chr11:15636906-15637531	chr11	15636906	15637531	27	NA	NA
chr11:76483529-76484183	chr11	76483529	76484183	27	NA	NA
chr11:77867166-77867906	chr11	77867166	77867906	27	NA	NA
chr12:6472860-6473562	chr12	6472860	6473562	27	NA	NA
chr12:15369205-15369925	chr12	15369205	15369925	27	NA	NA
chr12:54218971-54219592	chr12	54218971	54219592	27	NA	NA
chr12:97962406-97962971	chr12	97962406	97962971	27	NA	NA
chr12:102002092-102002840	chr12	102002092	102002840	27	NA	NA
chr12:123144006-123144740	chr12	123144006	123144740	27	NA	NA
chr12:125226492-125227142	chr12	125226492	125227142	27	NA	NA
chr14:23355828-23356457	chr14	23355828	23356457	27	NA	NA
chr14:94801051-94801701	chr14	94801051	94801701	27	NA	NA
chr14:104159715-104160349	chr14	104159715	104160349	27	NA	NA
chr15:62404918-62405553	chr15	62404918	62405553	27	NA	NA
chr15:69774982-69775586	chr15	69774982	69775586	27	NA	NA
chr15:75109618-75110240	chr15	75109618	75110240	27	NA	NA
chr15:83587821-83588650	chr15	83587821	83588650	27	NA	NA
chr15:89664580-89665132	chr15	89664580	89665132	27	NA	NA
chr16:4418939-4419522	chr16	4418939	4419522	27	NA	NA
chr16:30071845-30072842	chr16	30071845	30072842	27	NA	NA
chr16:67479171-67479822	chr16	67479171	67479822	27	NA	NA
chr16:85525470-85526103	chr16	85525470	85526103	27	NA	NA
chr17:39572024-39572719	chr17	39572024	39572719	27	NA	NA
chr17:61512803-61513454	chr17	61512803	61513454	27	NA	NA
chr17:78020928-78021564	chr17	78020928	78021564	27	NA	NA
chr18:9757744-9758468	chr18	9757744	9758468	27	NA	NA
chr18:37103144-37103755	chr18	37103144	37103755	27	NA	NA
chr18:46517114-46517761	chr18	46517114	46517761	27	NA	NA
chr18:74398744-74399351	chr18	74398744	74399351	27	NA	NA
chr19:2489180-2489798	chr19	2489180	2489798	27	NA	NA
chr19:3713028-3713687	chr19	3713028	3713687	27	NA	NA
chr19:4715637-4716381	chr19	4715637	4716381	27	NA	NA
chr19:7684030-7685371	chr19	7684030	7685371	27	NA	NA
chr19:18806687-18807342	chr19	18806687	18807342	27	NA	NA
chr19:35531731-35532384	chr19	35531731	35532384	27	NA	NA
chr19:35808237-35808921	chr19	35808237	35808921	27	NA	NA
chr19:35809830-35810487	chr19	35809830	35810487	27	NA	NA
chr19:38789534-38790287	chr19	38789534	38790287	27	NA	NA
chr2:26995236-26995944	chr2	26995236	26995944	27	NA	NA
chr2:55390797-55391483	chr2	55390797	55391483	27	NA	NA
chr2:177710305-177710953	chr2	177710305	177710953	27	NA	NA
chr2:178249855-178250501	chr2	178249855	178250501	27	NA	NA
chr2:189715434-189716053	chr2	189715434	189716053	27	NA	NA
chr2:215243253-215243931	chr2	215243253	215243931	27	NA	NA
chr2:226480101-226480705	chr2	226480101	226480705	27	NA	NA
chr2:226707653-226708337	chr2	226707653	226708337	27	NA	NA
chr2:227015734-227016397	chr2	227015734	227016397	27	NA	NA
chr20:19264005-19264695	chr20	19264005	19264695	27	NA	NA
chr20:47314367-47315155	chr20	47314367	47315155	27	NA	NA
chr20:47480990-47481820	chr20	47480990	47481820	27	NA	NA
chr21:45595904-45596477	chr21	45595904	45596477	27	NA	NA
chr22:30694203-30694836	chr22	30694203	30694836	27	NA	NA
chr22:41128627-41129240	chr22	41128627	41129240	27	NA	NA
chr22:43130286-43130977	chr22	43130286	43130977	27	NA	NA
chr3:50642339-50643073	chr3	50642339	50643073	27	NA	NA
chr3:72220989-72221666	chr3	72220989	72221666	27	NA	NA
chr3:77612116-77612699	chr3	77612116	77612699	27	NA	NA
chr3:150454916-150455589	chr3	150454916	150455589	27	NA	NA
chr3:153936415-153937073	chr3	153936415	153937073	27	NA	NA
chr4:2938690-2939355	chr4	2938690	2939355	27	NA	NA
chr4:77532490-77533161	chr4	77532490	77533161	27	NA	NA
chr4:99538886-99539540	chr4	99538886	99539540	27	NA	NA
chr4:141171190-141171813	chr4	141171190	141171813	27	NA	NA
chr5:33549979-33550624	chr5	33549979	33550624	27	NA	NA
chr5:66531462-66532057	chr5	66531462	66532057	27	NA	NA
chr5:71044174-71044764	chr5	71044174	71044764	27	NA	NA
chr5:116194379-116195159	chr5	116194379	116195159	27	NA	NA
chr5:122184824-122185450	chr5	122184824	122185450	27	NA	NA
chr5:154209009-154209908	chr5	154209009	154209908	27	NA	NA
chr6:6758970-6759626	chr6	6758970	6759626	27	NA	NA
chr6:20210361-20210933	chr6	20210361	20210933	27	NA	NA
chr6:21738678-21739563	chr6	21738678	21739563	27	NA	NA
chr6:33729776-33730333	chr6	33729776	33730333	27	NA	NA
chr6:38229362-38230159	chr6	38229362	38230159	27	NA	NA
chr6:42090319-42090936	chr6	42090319	42090936	27	NA	NA
chr6:44026209-44026981	chr6	44026209	44026981	27	NA	NA
chr6:109028559-109029236	chr6	109028559	109029236	27	NA	NA
chr6:135467636-135468259	chr6	135467636	135468259	27	NA	NA
chr7:2578991-2579637	chr7	2578991	2579637	27	NA	NA
chr7:34661986-34662722	chr7	34661986	34662722	27	NA	NA
chr7:36076835-36077393	chr7	36076835	36077393	27	NA	NA
chr7:99601437-99602224	chr7	99601437	99602224	27	NA	NA
chr7:120314037-120314687	chr7	120314037	120314687	27	NA	NA
chr8:22596436-22597129	chr8	22596436	22597129	27	NA	NA
chr8:117010368-117011036	chr8	117010368	117011036	27	NA	NA
chr8:121085350-121085984	chr8	121085350	121085984	27	NA	NA
chr8:128923329-128923983	chr8	128923329	128923983	27	NA	NA
chr8:134228584-134229283	chr8	134228584	134229283	27	NA	NA
chr9:4866226-4866852	chr9	4866226	4866852	27	NA	NA
chr9:33818030-33818602	chr9	33818030	33818602	27	NA	NA
chr9:95428097-95428741	chr9	95428097	95428741	27	NA	NA
chr9:117670342-117670997	chr9	117670342	117670997	27	NA	NA
chr9:130717697-130718433	chr9	130717697	130718433	27	NA	NA
chr9:131955852-131956490	chr9	131955852	131956490	27	NA	NA
chr9:132517541-132518426	chr9	132517541	132518426	27	NA	NA
chrX:40377249-40377836	chrX	40377249	40377836	27	NA	NA
chrX:100000767-100001449	chrX	100000767	100001449	27	NA	NA
chrX:139574309-139574931	chrX	139574309	139574931	27	NA	NA
chr21:16582447-16583072	chr21	16582447	16583072	26	rs2823144:16582933:C:G	1.547e-12
chr3:27356364-27356986	chr3	27356364	27356986	26	rs616820:27356779:C:G	1.403e-53
chr1:8043354-8044005	chr1	8043354	8044005	26	NA	NA
chr1:22799001-22799617	chr1	22799001	22799617	26	NA	NA
chr1:75118085-75118755	chr1	75118085	75118755	26	NA	NA
chr1:114519107-114519767	chr1	114519107	114519767	26	NA	NA
chr1:202101404-202102135	chr1	202101404	202102135	26	NA	NA
chr1:215598403-215599001	chr1	215598403	215599001	26	NA	NA
chr10:482014-482661	chr10	482014	482661	26	NA	NA
chr10:5698456-5699025	chr10	5698456	5699025	26	NA	NA
chr10:71079061-71079707	chr10	71079061	71079707	26	NA	NA
chr10:79631936-79632606	chr10	79631936	79632606	26	NA	NA
chr10:81101907-81103114	chr10	81101907	81103114	26	NA	NA
chr10:90234094-90234761	chr10	90234094	90234761	26	NA	NA
chr10:115816710-115817310	chr10	115816710	115817310	26	NA	NA
chr10:124987173-124987847	chr10	124987173	124987847	26	NA	NA
chr11:75044694-75045283	chr11	75044694	75045283	26	NA	NA
chr11:76499482-76500233	chr11	76499482	76500233	26	NA	NA
chr11:77970969-77971629	chr11	77970969	77971629	26	NA	NA
chr11:125820906-125821679	chr11	125820906	125821679	26	NA	NA
chr12:2884512-2885210	chr12	2884512	2885210	26	NA	NA
chr12:48415542-48416160	chr12	48415542	48416160	26	NA	NA
chr12:69833807-69834412	chr12	69833807	69834412	26	NA	NA
chr12:124866242-124866910	chr12	124866242	124866910	26	NA	NA
chr12:124873406-124874175	chr12	124873406	124874175	26	NA	NA
chr12:125478260-125478926	chr12	125478260	125478926	26	NA	NA
chr13:113567718-113568279	chr13	113567718	113568279	26	NA	NA
chr13:114631477-114632200	chr13	114631477	114632200	26	NA	NA
chr14:69036601-69037251	chr14	69036601	69037251	26	NA	NA
chr14:69412519-69413144	chr14	69412519	69413144	26	NA	NA
chr14:95522681-95523275	chr14	95522681	95523275	26	NA	NA
chr14:100056799-100057425	chr14	100056799	100057425	26	NA	NA
chr15:62765030-62765618	chr15	62765030	62765618	26	NA	NA
chr15:64237782-64238439	chr15	64237782	64238439	26	NA	NA
chr15:70755100-70755839	chr15	70755100	70755839	26	NA	NA
chr15:99292305-99292953	chr15	99292305	99292953	26	NA	NA
chr16:377071-377925	chr16	377071	377925	26	NA	NA
chr16:501472-502101	chr16	501472	502101	26	NA	NA
chr16:1680703-1681337	chr16	1680703	1681337	26	NA	NA
chr16:11706009-11706721	chr16	11706009	11706721	26	NA	NA
chr16:19142671-19143303	chr16	19142671	19143303	26	NA	NA
chr16:23335951-23336587	chr16	23335951	23336587	26	NA	NA
chr16:23373803-23374421	chr16	23373803	23374421	26	NA	NA
chr16:54457949-54458545	chr16	54457949	54458545	26	NA	NA
chr16:56404670-56405264	chr16	56404670	56405264	26	NA	NA
chr17:5217036-5217678	chr17	5217036	5217678	26	NA	NA
chr17:7389454-7390078	chr17	7389454	7390078	26	NA	NA
chr17:38705308-38706113	chr17	38705308	38706113	26	NA	NA
chr17:43390628-43391188	chr17	43390628	43391188	26	NA	NA
chr17:63190718-63191320	chr17	63190718	63191320	26	NA	NA
chr17:72756691-72757341	chr17	72756691	72757341	26	NA	NA
chr17:76417288-76418064	chr17	76417288	76418064	26	NA	NA
chr18:12948018-12948714	chr18	12948018	12948714	26	NA	NA
chr18:46547798-46548448	chr18	46547798	46548448	26	NA	NA
chr19:3336630-3337334	chr19	3336630	3337334	26	NA	NA
chr19:3387667-3388248	chr19	3387667	3388248	26	NA	NA
chr19:19110121-19110821	chr19	19110121	19110821	26	NA	NA
chr19:45221671-45222337	chr19	45221671	45222337	26	NA	NA
chr2:46047697-46048301	chr2	46047697	46048301	26	NA	NA
chr2:109211294-109211931	chr2	109211294	109211931	26	NA	NA
chr20:3049496-3050151	chr20	3049496	3050151	26	NA	NA
chr20:34652593-34653296	chr20	34652593	34653296	26	NA	NA
chr20:43968893-43969505	chr20	43968893	43969505	26	NA	NA
chr20:45973847-45974478	chr20	45973847	45974478	26	NA	NA
chr20:49343812-49344514	chr20	49343812	49344514	26	NA	NA
chr20:52811567-52812353	chr20	52811567	52812353	26	NA	NA
chr21:16959119-16959774	chr21	16959119	16959774	26	NA	NA
chr22:19836133-19836820	chr22	19836133	19836820	26	NA	NA
chr3:4791813-4792371	chr3	4791813	4792371	26	NA	NA
chr3:15334315-15335023	chr3	15334315	15335023	26	NA	NA
chr3:37220586-37221215	chr3	37220586	37221215	26	NA	NA
chr3:52271578-52272299	chr3	52271578	52272299	26	NA	NA
chr3:53585178-53585823	chr3	53585178	53585823	26	NA	NA
chr3:58025723-58026315	chr3	58025723	58026315	26	NA	NA
chr3:58082465-58083049	chr3	58082465	58083049	26	NA	NA
chr3:58088678-58089286	chr3	58088678	58089286	26	NA	NA
chr3:150562189-150562846	chr3	150562189	150562846	26	NA	NA
chr3:159659323-159659905	chr3	159659323	159659905	26	NA	NA
chr3:170052489-170053082	chr3	170052489	170053082	26	NA	NA
chr3:176671393-176672036	chr3	176671393	176672036	26	NA	NA
chr4:1239055-1239755	chr4	1239055	1239755	26	NA	NA
chr4:1827505-1828155	chr4	1827505	1828155	26	NA	NA
chr4:9700555-9701262	chr4	9700555	9701262	26	NA	NA
chr4:77484552-77485186	chr4	77484552	77485186	26	NA	NA
chr4:153857136-153857713	chr4	153857136	153857713	26	NA	NA
chr4:186434736-186435411	chr4	186434736	186435411	26	NA	NA
chr5:10954653-10955342	chr5	10954653	10955342	26	NA	NA
chr5:14394508-14395107	chr5	14394508	14395107	26	NA	NA
chr5:32144574-32145257	chr5	32144574	32145257	26	NA	NA
chr5:55724872-55725459	chr5	55724872	55725459	26	NA	NA
chr5:167743242-167743833	chr5	167743242	167743833	26	NA	NA
chr5:172899392-172900657	chr5	172899392	172900657	26	NA	NA
chr6:35695566-35696234	chr6	35695566	35696234	26	NA	NA
chr6:83279663-83280327	chr6	83279663	83280327	26	NA	NA
chr6:110876026-110876678	chr6	110876026	110876678	26	NA	NA
chr6:133756246-133756925	chr6	133756246	133756925	26	NA	NA
chr6:149401173-149401786	chr6	149401173	149401786	26	NA	NA
chr7:2728585-2729243	chr7	2728585	2729243	26	NA	NA
chr7:47615484-47616143	chr7	47615484	47616143	26	NA	NA
chr8:8094284-8095036	chr8	8094284	8095036	26	NA	NA
chr8:11588036-11588686	chr8	11588036	11588686	26	NA	NA
chr8:29666961-29667700	chr8	29666961	29667700	26	NA	NA
chr8:96705350-96706015	chr8	96705350	96706015	26	NA	NA
chr8:100917300-100918226	chr8	100917300	100918226	26	NA	NA
chr8:124417626-124418250	chr8	124417626	124418250	26	NA	NA
chr9:33234033-33234752	chr9	33234033	33234752	26	NA	NA
chr9:92279683-92280302	chr9	92279683	92280302	26	NA	NA
chr9:110006023-110006652	chr9	110006023	110006652	26	NA	NA
chr9:114774326-114774934	chr9	114774326	114774934	26	NA	NA
chr9:128213191-128213833	chr9	128213191	128213833	26	NA	NA
chr9:128223002-128223608	chr9	128223002	128223608	26	NA	NA
chrX:16680336-16681049	chrX	16680336	16681049	26	NA	NA
chrX:67682044-67682667	chrX	67682044	67682667	26	NA	NA
chr1:8403503-8404112	chr1	8403503	8404112	25	NA	NA
chr1:10812353-10812967	chr1	10812353	10812967	25	NA	NA
chr1:11434317-11435012	chr1	11434317	11435012	25	NA	NA
chr1:17846631-17847551	chr1	17846631	17847551	25	NA	NA
chr1:36952305-36952962	chr1	36952305	36952962	25	NA	NA
chr1:45770217-45770812	chr1	45770217	45770812	25	NA	NA
chr1:51772533-51773133	chr1	51772533	51773133	25	NA	NA
chr1:54873105-54873817	chr1	54873105	54873817	25	NA	NA
chr1:57253853-57254512	chr1	57253853	57254512	25	NA	NA
chr1:62108101-62108882	chr1	62108101	62108882	25	NA	NA
chr1:65509951-65510605	chr1	65509951	65510605	25	NA	NA
chr1:145246155-145246720	chr1	145246155	145246720	25	NA	NA
chr1:182284204-182284905	chr1	182284204	182284905	25	NA	NA
chr1:201573923-201574553	chr1	201573923	201574553	25	NA	NA
chr1:202081804-202082462	chr1	202081804	202082462	25	NA	NA
chr1:207076801-207077455	chr1	207076801	207077455	25	NA	NA
chr1:234859554-234860962	chr1	234859554	234860962	25	NA	NA
chr1:235098867-235099570	chr1	235098867	235099570	25	NA	NA
chr10:6195144-6195747	chr10	6195144	6195747	25	NA	NA
chr10:8767894-8768464	chr10	8767894	8768464	25	NA	NA
chr10:43521636-43522354	chr10	43521636	43522354	25	NA	NA
chr10:44668757-44669464	chr10	44668757	44669464	25	NA	NA
chr10:65390096-65391026	chr10	65390096	65391026	25	NA	NA
chr10:75579186-75579863	chr10	75579186	75579863	25	NA	NA
chr10:79629586-79630225	chr10	79629586	79630225	25	NA	NA
chr10:80062886-80063568	chr10	80062886	80063568	25	NA	NA
chr10:115687018-115687614	chr10	115687018	115687614	25	NA	NA
chr10:126349104-126349844	chr10	126349104	126349844	25	NA	NA
chr11:12267056-12267644	chr11	12267056	12267644	25	NA	NA
chr11:45182778-45183619	chr11	45182778	45183619	25	NA	NA
chr11:62608931-62609678	chr11	62608931	62609678	25	NA	NA
chr11:75053867-75054828	chr11	75053867	75054828	25	NA	NA
chr11:84398433-84399095	chr11	84398433	84399095	25	NA	NA
chr11:101169776-101170494	chr11	101169776	101170494	25	NA	NA
chr11:114186556-114187183	chr11	114186556	114187183	25	NA	NA
chr11:129512879-129513566	chr11	129512879	129513566	25	NA	NA
chr12:6344475-6345110	chr12	6344475	6345110	25	NA	NA
chr12:6373710-6374392	chr12	6373710	6374392	25	NA	NA
chr12:13036245-13036906	chr12	13036245	13036906	25	NA	NA
chr12:15395907-15396845	chr12	15395907	15396845	25	NA	NA
chr12:23378625-23379290	chr12	23378625	23379290	25	NA	NA
chr12:56387457-56388140	chr12	56387457	56388140	25	NA	NA
chr12:75265490-75266160	chr12	75265490	75266160	25	NA	NA
chr12:113683571-113684810	chr12	113683571	113684810	25	NA	NA
chr12:119608905-119609525	chr12	119608905	119609525	25	NA	NA
chr12:125230255-125230991	chr12	125230255	125230991	25	NA	NA
chr12:132345240-132345825	chr12	132345240	132345825	25	NA	NA
chr13:72287047-72287630	chr13	72287047	72287630	25	NA	NA
chr14:24134524-24135144	chr14	24134524	24135144	25	NA	NA
chr14:32978824-32979407	chr14	32978824	32979407	25	NA	NA
chr14:65584957-65585607	chr14	65584957	65585607	25	NA	NA
chr14:93412494-93413107	chr14	93412494	93413107	25	NA	NA
chr14:93477840-93478604	chr14	93477840	93478604	25	NA	NA
chr14:95102938-95103581	chr14	95102938	95103581	25	NA	NA
chr14:105498499-105499207	chr14	105498499	105499207	25	NA	NA
chr15:62042568-62043182	chr15	62042568	62043182	25	NA	NA
chr15:84422568-84423236	chr15	84422568	84423236	25	NA	NA
chr15:92731280-92731905	chr15	92731280	92731905	25	NA	NA
chr15:99294980-99295618	chr15	99294980	99295618	25	NA	NA
chr16:2769094-2769775	chr16	2769094	2769775	25	NA	NA
chr16:10688351-10688971	chr16	10688351	10688971	25	NA	NA
chr16:20598953-20599599	chr16	20598953	20599599	25	NA	NA
chr16:23218692-23219503	chr16	23218692	23219503	25	NA	NA
chr16:23551444-23552103	chr16	23551444	23552103	25	NA	NA
chr16:29322071-29322753	chr16	29322071	29322753	25	NA	NA
chr16:56279951-56280588	chr16	56279951	56280588	25	NA	NA
chr16:69358286-69358909	chr16	69358286	69358909	25	NA	NA
chr17:990778-991382	chr17	990778	991382	25	NA	NA
chr17:8957378-8957970	chr17	8957378	8957970	25	NA	NA
chr17:17790104-17790744	chr17	17790104	17790744	25	NA	NA
chr17:26824903-26825520	chr17	26824903	26825520	25	NA	NA
chr17:26863659-26864378	chr17	26863659	26864378	25	NA	NA
chr17:31846541-31847209	chr17	31846541	31847209	25	NA	NA
chr17:40124819-40125432	chr17	40124819	40125432	25	NA	NA
chr17:43201709-43202538	chr17	43201709	43202538	25	NA	NA
chr17:55911470-55912104	chr17	55911470	55912104	25	NA	NA
chr17:64948128-64948820	chr17	64948128	64948820	25	NA	NA
chr17:77916209-77916913	chr17	77916209	77916913	25	NA	NA
chr17:78042253-78043013	chr17	78042253	78043013	25	NA	NA
chr17:80571791-80572476	chr17	80571791	80572476	25	NA	NA
chr18:20451594-20452218	chr18	20451594	20452218	25	NA	NA
chr18:21207105-21207702	chr18	21207105	21207702	25	NA	NA
chr18:21209301-21209948	chr18	21209301	21209948	25	NA	NA
chr18:21302298-21303051	chr18	21302298	21303051	25	NA	NA
chr18:24155118-24155851	chr18	24155118	24155851	25	NA	NA
chr18:43693644-43694273	chr18	43693644	43694273	25	NA	NA
chr18:46523244-46523901	chr18	46523244	46523901	25	NA	NA
chr18:46839246-46839894	chr18	46839246	46839894	25	NA	NA
chr19:2576080-2576692	chr19	2576080	2576692	25	NA	NA
chr19:4697337-4697971	chr19	4697337	4697971	25	NA	NA
chr19:7968778-7969498	chr19	7968778	7969498	25	NA	NA
chr19:16256171-16256744	chr19	16256171	16256744	25	NA	NA
chr19:23583021-23583721	chr19	23583021	23583721	25	NA	NA
chr19:24000342-24000934	chr19	24000342	24000934	25	NA	NA
chr19:40755321-40756230	chr19	40755321	40756230	25	NA	NA
chr19:41402973-41403648	chr19	41402973	41403648	25	NA	NA
chr19:48151242-48152037	chr19	48151242	48152037	25	NA	NA
chr19:49056987-49057737	chr19	49056987	49057737	25	NA	NA
chr19:49066331-49066937	chr19	49066331	49066937	25	NA	NA
chr19:50073721-50074321	chr19	50073721	50074321	25	NA	NA
chr2:7148126-7148851	chr2	7148126	7148851	25	NA	NA
chr2:11262384-11263005	chr2	11262384	11263005	25	NA	NA
chr2:11664394-11665053	chr2	11664394	11665053	25	NA	NA
chr2:11671031-11671583	chr2	11671031	11671583	25	NA	NA
chr2:70224476-70225153	chr2	70224476	70225153	25	NA	NA
chr2:73212956-73213734	chr2	73212956	73213734	25	NA	NA
chr2:101736894-101737555	chr2	101736894	101737555	25	NA	NA
chr2:129063733-129064306	chr2	129063733	129064306	25	NA	NA
chr2:159967894-159968601	chr2	159967894	159968601	25	NA	NA
chr2:198478134-198478748	chr2	198478134	198478748	25	NA	NA
chr2:237733431-237734041	chr2	237733431	237734041	25	NA	NA
chr2:238410883-238411555	chr2	238410883	238411555	25	NA	NA
chr2:238418586-238419203	chr2	238418586	238419203	25	NA	NA
chr2:241009194-241009855	chr2	241009194	241009855	25	NA	NA
chr2:241190532-241191476	chr2	241190532	241191476	25	NA	NA
chr20:9512143-9512762	chr20	9512143	9512762	25	NA	NA
chr20:42930792-42931443	chr20	42930792	42931443	25	NA	NA
chr20:46540692-46541393	chr20	46540692	46541393	25	NA	NA
chr20:52765464-52766053	chr20	52765464	52766053	25	NA	NA
chr22:27741250-27741952	chr22	27741250	27741952	25	NA	NA
chr22:29218813-29219426	chr22	29218813	29219426	25	NA	NA
chr22:30686927-30687540	chr22	30686927	30687540	25	NA	NA
chr22:39878753-39879362	chr22	39878753	39879362	25	NA	NA
chr22:41813900-41814430	chr22	41813900	41814430	25	NA	NA
chr22:43787203-43787812	chr22	43787203	43787812	25	NA	NA
chr22:50346620-50347277	chr22	50346620	50347277	25	NA	NA
chr3:5028386-5029015	chr3	5028386	5029015	25	NA	NA
chr3:53179172-53179849	chr3	53179172	53179849	25	NA	NA
chr3:188891382-188892073	chr3	188891382	188892073	25	NA	NA
chr3:193876665-193877246	chr3	193876665	193877246	25	NA	NA
chr3:195641481-195642123	chr3	195641481	195642123	25	NA	NA
chr3:197079816-197080489	chr3	197079816	197080489	25	NA	NA
chr4:37649636-37650258	chr4	37649636	37650258	25	NA	NA
chr4:141072004-141072797	chr4	141072004	141072797	25	NA	NA
chr5:34585542-34586208	chr5	34585542	34586208	25	NA	NA
chr5:99983158-99983924	chr5	99983158	99983924	25	NA	NA
chr5:180022492-180023114	chr5	180022492	180023114	25	NA	NA
chr6:17393827-17394528	chr6	17393827	17394528	25	NA	NA
chr6:34518520-34519169	chr6	34518520	34519169	25	NA	NA
chr6:49509669-49510231	chr6	49509669	49510231	25	NA	NA
chr6:53330577-53331074	chr6	53330577	53331074	25	NA	NA
chr6:73737874-73738562	chr6	73737874	73738562	25	NA	NA
chr6:88283663-88284374	chr6	88283663	88284374	25	NA	NA
chr6:150038619-150039377	chr6	150038619	150039377	25	NA	NA
chr6:167418962-167419609	chr6	167418962	167419609	25	NA	NA
chr7:1494785-1495437	chr7	1494785	1495437	25	NA	NA
chr7:21752674-21753390	chr7	21752674	21753390	25	NA	NA
chr7:36124333-36125092	chr7	36124333	36125092	25	NA	NA
chr7:42871792-42872741	chr7	42871792	42872741	25	NA	NA
chr7:56032335-56032937	chr7	56032335	56032937	25	NA	NA
chr7:66658087-66658774	chr7	66658087	66658774	25	NA	NA
chr7:150727937-150728543	chr7	150727937	150728543	25	NA	NA
chr7:158805485-158806487	chr7	158805485	158806487	25	NA	NA
chr8:8146529-8147180	chr8	8146529	8147180	25	NA	NA
chr8:29144228-29144850	chr8	29144228	29144850	25	NA	NA
chr8:29437200-29437829	chr8	29437200	29437829	25	NA	NA
chr8:75488570-75489229	chr8	75488570	75489229	25	NA	NA
chr8:97957983-97958611	chr8	97957983	97958611	25	NA	NA
chr8:125212183-125212833	chr8	125212183	125212833	25	NA	NA
chr8:128680776-128681433	chr8	128680776	128681433	25	NA	NA
chr8:128812928-128813568	chr8	128812928	128813568	25	NA	NA
chr9:73033976-73035397	chr9	73033976	73035397	25	NA	NA
chr9:91616093-91616746	chr9	91616093	91616746	25	NA	NA
chr9:130307526-130308150	chr9	130307526	130308150	25	NA	NA
chr9:132168591-132169241	chr9	132168591	132169241	25	NA	NA
chr9:132250747-132251383	chr9	132250747	132251383	25	NA	NA
chrX:93855102-93855804	chrX	93855102	93855804	25	NA	NA
chrX:119619609-119620249	chrX	119619609	119620249	25	NA	NA
chrX:149209355-149209936	chrX	149209355	149209936	25	NA	NA
chr18:42411596-42412161	chr18	42411596	42412161	24	rs78955132:42411651:A:G	6.717e-13
chr1:9385801-9386417	chr1	9385801	9386417	24	NA	NA
chr1:10010403-10011017	chr1	10010403	10011017	24	NA	NA
chr1:16840367-16841076	chr1	16840367	16841076	24	NA	NA
chr1:25802603-25803176	chr1	25802603	25803176	24	NA	NA
chr1:42255303-42255954	chr1	42255303	42255954	24	NA	NA
chr1:48360253-48361412	chr1	48360253	48361412	24	NA	NA
chr1:91565317-91566165	chr1	91565317	91566165	24	NA	NA
chr1:100951312-100951955	chr1	100951312	100951955	24	NA	NA
chr1:176468781-176469423	chr1	176468781	176469423	24	NA	NA
chr1:180136804-180137562	chr1	180136804	180137562	24	NA	NA
chr1:201992103-201992704	chr1	201992103	201992704	24	NA	NA
chr1:225091401-225092185	chr1	225091401	225092185	24	NA	NA
chr10:82726214-82726849	chr10	82726214	82726849	24	NA	NA
chr10:95205247-95205768	chr10	95205247	95205768	24	NA	NA
chr10:120384961-120385594	chr10	120384961	120385594	24	NA	NA
chr11:1507079-1507806	chr11	1507079	1507806	24	NA	NA
chr11:9918366-9919082	chr11	9918366	9919082	24	NA	NA
chr11:17260781-17261316	chr11	17260781	17261316	24	NA	NA
chr11:44606182-44606794	chr11	44606182	44606794	24	NA	NA
chr11:46385056-46385681	chr11	46385056	46385681	24	NA	NA
chr11:66795106-66795745	chr11	66795106	66795745	24	NA	NA
chr11:78022832-78023466	chr11	78022832	78023466	24	NA	NA
chr11:87634883-87635506	chr11	87634883	87635506	24	NA	NA
chr11:94578671-94579281	chr11	94578671	94579281	24	NA	NA
chr12:834112-834760	chr12	834112	834760	24	NA	NA
chr12:2921838-2922575	chr12	2921838	2922575	24	NA	NA
chr12:3623355-3624008	chr12	3623355	3624008	24	NA	NA
chr12:13025075-13025890	chr12	13025075	13025890	24	NA	NA
chr12:63480238-63480860	chr12	63480238	63480860	24	NA	NA
chr12:97894206-97894912	chr12	97894206	97894912	24	NA	NA
chr12:102942212-102942892	chr12	102942212	102942892	24	NA	NA
chr12:125093460-125094142	chr12	125093460	125094142	24	NA	NA
chr12:125322639-125323342	chr12	125322639	125323342	24	NA	NA
chr13:28609118-28609775	chr13	28609118	28609775	24	NA	NA
chr13:65788547-65789180	chr13	65788547	65789180	24	NA	NA
chr13:99072072-99072854	chr13	99072072	99072854	24	NA	NA
chr14:59827844-59828507	chr14	59827844	59828507	24	NA	NA
chr14:75721141-75722155	chr14	75721141	75722155	24	NA	NA
chr14:91593699-91594331	chr14	91593699	91594331	24	NA	NA
chr14:100525674-100526251	chr14	100525674	100526251	24	NA	NA
chr15:70613432-70614050	chr15	70613432	70614050	24	NA	NA
chr15:90325359-90325955	chr15	90325359	90325955	24	NA	NA
chr16:803344-804001	chr16	803344	804001	24	NA	NA
chr16:2379544-2380222	chr16	2379544	2380222	24	NA	NA
chr16:20451001-20451605	chr16	20451001	20451605	24	NA	NA
chr16:67628522-67629203	chr16	67628522	67629203	24	NA	NA
chr16:68271387-68272104	chr16	68271387	68272104	24	NA	NA
chr16:75063572-75064204	chr16	75063572	75064204	24	NA	NA
chr16:79804075-79805020	chr16	79804075	79805020	24	NA	NA
chr17:14109182-14109795	chr17	14109182	14109795	24	NA	NA
chr17:29827120-29827728	chr17	29827120	29827728	24	NA	NA
chr17:39949319-39949953	chr17	39949319	39949953	24	NA	NA
chr17:70680063-70680696	chr17	70680063	70680696	24	NA	NA
chr17:80110291-80110969	chr17	80110291	80110969	24	NA	NA
chr18:41456573-41457204	chr18	41456573	41457204	24	NA	NA
chr18:51183551-51184218	chr18	51183551	51184218	24	NA	NA
chr18:55460748-55461361	chr18	55460748	55461361	24	NA	NA
chr18:76822751-76823311	chr18	76822751	76823311	24	NA	NA
chr19:1207837-1208448	chr19	1207837	1208448	24	NA	NA
chr19:2524898-2525521	chr19	2524898	2525521	24	NA	NA
chr19:7716942-7717534	chr19	7716942	7717534	24	NA	NA
chr19:16114267-16114892	chr19	16114267	16114892	24	NA	NA
chr19:16192648-16193230	chr19	16192648	16193230	24	NA	NA
chr19:41337728-41338342	chr19	41337728	41338342	24	NA	NA
chr19:51574217-51574830	chr19	51574217	51574830	24	NA	NA
chr2:7932226-7932936	chr2	7932226	7932936	24	NA	NA
chr2:18981633-18982301	chr2	18981633	18982301	24	NA	NA
chr2:20271344-20272101	chr2	20271344	20272101	24	NA	NA
chr2:35522394-35523003	chr2	35522394	35523003	24	NA	NA
chr2:42237803-42238401	chr2	42237803	42238401	24	NA	NA
chr2:43103426-43104103	chr2	43103426	43104103	24	NA	NA
chr2:43500676-43501247	chr2	43500676	43501247	24	NA	NA
chr2:65133944-65134555	chr2	65133944	65134555	24	NA	NA
chr2:70203082-70204197	chr2	70203082	70204197	24	NA	NA
chr2:71157655-71158286	chr2	71157655	71158286	24	NA	NA
chr2:101733634-101734255	chr2	101733634	101734255	24	NA	NA
chr2:113348876-113349455	chr2	113348876	113349455	24	NA	NA
chr2:134250397-134251001	chr2	134250397	134251001	24	NA	NA
chr2:171095126-171095755	chr2	171095126	171095755	24	NA	NA
chr2:237949882-237950432	chr2	237949882	237950432	24	NA	NA
chr20:10642946-10643651	chr20	10642946	10643651	24	NA	NA
chr20:19110698-19111314	chr20	19110698	19111314	24	NA	NA
chr20:23576490-23577212	chr20	23576490	23577212	24	NA	NA
chr20:24992246-24992876	chr20	24992246	24992876	24	NA	NA
chr20:34615043-34615669	chr20	34615043	34615669	24	NA	NA
chr20:47188648-47189247	chr20	47188648	47189247	24	NA	NA
chr20:47280012-47280748	chr20	47280012	47280748	24	NA	NA
chr20:47562348-47562914	chr20	47562348	47562914	24	NA	NA
chr20:52740103-52740705	chr20	52740103	52740705	24	NA	NA
chr20:62917955-62918853	chr20	62917955	62918853	24	NA	NA
chr21:16235622-16236248	chr21	16235622	16236248	24	NA	NA
chr21:36109174-36109797	chr21	36109174	36109797	24	NA	NA
chr21:43124222-43124956	chr21	43124222	43124956	24	NA	NA
chr22:29214306-29215059	chr22	29214306	29215059	24	NA	NA
chr22:30194609-30195618	chr22	30194609	30195618	24	NA	NA
chr22:30804653-30805240	chr22	30804653	30805240	24	NA	NA
chr22:41868256-41868890	chr22	41868256	41868890	24	NA	NA
chr22:43594702-43595353	chr22	43594702	43595353	24	NA	NA
chr22:48320836-48321490	chr22	48320836	48321490	24	NA	NA
chr22:50329640-50330226	chr22	50329640	50330226	24	NA	NA
chr22:50465911-50466833	chr22	50465911	50466833	24	NA	NA
chr3:14454328-14454886	chr3	14454328	14454886	24	NA	NA
chr3:50638373-50639666	chr3	50638373	50639666	24	NA	NA
chr3:53189723-53190416	chr3	53189723	53190416	24	NA	NA
chr3:70786878-70787816	chr3	70786878	70787816	24	NA	NA
chr3:107705366-107706474	chr3	107705366	107706474	24	NA	NA
chr3:129627123-129627703	chr3	129627123	129627703	24	NA	NA
chr3:150032296-150032836	chr3	150032296	150032836	24	NA	NA
chr3:150491253-150491973	chr3	150491253	150491973	24	NA	NA
chr3:187634846-187635516	chr3	187634846	187635516	24	NA	NA
chr3:188000815-188001466	chr3	188000815	188001466	24	NA	NA
chr3:192569606-192570264	chr3	192569606	192570264	24	NA	NA
chr4:3468358-3469205	chr4	3468358	3469205	24	NA	NA
chr4:28315703-28316386	chr4	28315703	28316386	24	NA	NA
chr4:75869304-75869971	chr4	75869304	75869971	24	NA	NA
chr4:105817783-105818458	chr4	105817783	105818458	24	NA	NA
chr4:150780203-150780790	chr4	150780203	150780790	24	NA	NA
chr5:16626679-16627308	chr5	16626679	16627308	24	NA	NA
chr5:66510859-66512179	chr5	66510859	66512179	24	NA	NA
chr5:131590146-131590800	chr5	131590146	131590800	24	NA	NA
chr5:141229107-141229696	chr5	141229107	141229696	24	NA	NA
chr6:15221961-15222669	chr6	15221961	15222669	24	NA	NA
chr6:38404624-38405312	chr6	38404624	38405312	24	NA	NA
chr6:125523261-125523834	chr6	125523261	125523834	24	NA	NA
chr6:151937227-151937836	chr6	151937227	151937836	24	NA	NA
chr6:151979104-151979763	chr6	151979104	151979763	24	NA	NA
chr7:27317135-27317737	chr7	27317135	27317737	24	NA	NA
chr7:34530585-34531187	chr7	34530585	34531187	24	NA	NA
chr7:42109186-42110136	chr7	42109186	42110136	24	NA	NA
chr7:45582987-45583587	chr7	45582987	45583587	24	NA	NA
chr7:95179274-95179991	chr7	95179274	95179991	24	NA	NA
chr7:101616093-101616837	chr7	101616093	101616837	24	NA	NA
chr7:105280274-105280891	chr7	105280274	105280891	24	NA	NA
chr8:25265476-25266100	chr8	25265476	25266100	24	NA	NA
chr8:36919650-36920215	chr8	36919650	36920215	24	NA	NA
chr8:37455983-37456688	chr8	37455983	37456688	24	NA	NA
chr8:102132786-102133486	chr8	102132786	102133486	24	NA	NA
chr8:120994829-120995550	chr8	120994829	120995550	24	NA	NA
chr8:128871911-128872586	chr8	128871911	128872586	24	NA	NA
chr9:10109841-10110452	chr9	10109841	10110452	24	NA	NA
chr9:86046693-86047602	chr9	86046693	86047602	24	NA	NA
chr9:94914076-94914752	chr9	94914076	94914752	24	NA	NA
chr9:95834383-95835091	chr9	95834383	95835091	24	NA	NA
chr9:100908433-100909147	chr9	100908433	100909147	24	NA	NA
chr9:112913843-112914447	chr9	112913843	112914447	24	NA	NA
chr9:132535847-132536452	chr9	132535847	132536452	24	NA	NA
chr9:139121350-139121973	chr9	139121350	139121973	24	NA	NA
chr9:140376497-140377097	chr9	140376497	140377097	24	NA	NA
chrX:39813099-39813659	chrX	39813099	39813659	24	NA	NA
chrX:153877841-153878616	chrX	153877841	153878616	24	NA	NA
chr14:91742674-91743338	chr14	91742674	91743338	23	rs7153397:91742924:C:T	3.36e-11
chr2:218252605-218253247	chr2	218252605	218253247	23	rs78040234:218253049:A:T	1.092e-11
chr8:23651400-23652079	chr8	23651400	23652079	23	rs444242:23651702:G:T	9.113e-09
chr1:1724703-1725451	chr1	1724703	1725451	23	NA	NA
chr1:7634354-7635005	chr1	7634354	7635005	23	NA	NA
chr1:15611303-15611962	chr1	15611303	15611962	23	NA	NA
chr1:16339253-16340055	chr1	16339253	16340055	23	NA	NA
chr1:17355862-17356476	chr1	17355862	17356476	23	NA	NA
chr1:17641185-17641762	chr1	17641185	17641762	23	NA	NA
chr1:22738985-22739703	chr1	22738985	22739703	23	NA	NA
chr1:22740655-22741262	chr1	22740655	22741262	23	NA	NA
chr1:41364985-41365654	chr1	41364985	41365654	23	NA	NA
chr1:44015741-44016355	chr1	44015741	44016355	23	NA	NA
chr1:44296415-44297017	chr1	44296415	44297017	23	NA	NA
chr1:96354467-96355105	chr1	96354467	96355105	23	NA	NA
chr1:156441303-156442115	chr1	156441303	156442115	23	NA	NA
chr1:156586153-156586776	chr1	156586153	156586776	23	NA	NA
chr1:184898962-184899576	chr1	184898962	184899576	23	NA	NA
chr1:202015304-202016482	chr1	202015304	202016482	23	NA	NA
chr1:203250053-203250712	chr1	203250053	203250712	23	NA	NA
chr1:204349504-204350103	chr1	204349504	204350103	23	NA	NA
chr1:208021553-208022105	chr1	208021553	208022105	23	NA	NA
chr1:229356951-229357703	chr1	229356951	229357703	23	NA	NA
chr1:246771955-246772654	chr1	246771955	246772654	23	NA	NA
chr10:12914586-12915323	chr10	12914586	12915323	23	NA	NA
chr10:17429907-17430686	chr10	17429907	17430686	23	NA	NA
chr10:17507704-17508336	chr10	17507704	17508336	23	NA	NA
chr10:30831044-30831714	chr10	30831044	30831714	23	NA	NA
chr10:32047861-32048469	chr10	32047861	32048469	23	NA	NA
chr10:61082757-61083414	chr10	61082757	61083414	23	NA	NA
chr10:73828611-73829164	chr10	73828611	73829164	23	NA	NA
chr10:79616947-79617544	chr10	79616947	79617544	23	NA	NA
chr10:81118397-81118968	chr10	81118397	81118968	23	NA	NA
chr10:103391554-103392170	chr10	103391554	103392170	23	NA	NA
chr10:117840057-117840694	chr10	117840057	117840694	23	NA	NA
chr10:126812207-126812868	chr10	126812207	126812868	23	NA	NA
chr11:15640021-15640695	chr11	15640021	15640695	23	NA	NA
chr11:17791469-17792083	chr11	17791469	17792083	23	NA	NA
chr11:18092666-18093344	chr11	18092666	18093344	23	NA	NA
chr11:19817828-19818483	chr11	19817828	19818483	23	NA	NA
chr11:44610726-44611382	chr11	44610726	44611382	23	NA	NA
chr11:67016006-67016628	chr11	67016006	67016628	23	NA	NA
chr11:70781333-70781982	chr11	70781333	70781982	23	NA	NA
chr11:75062093-75062831	chr11	75062093	75062831	23	NA	NA
chr11:93929456-93930045	chr11	93929456	93930045	23	NA	NA
chr11:114033466-114034056	chr11	114033466	114034056	23	NA	NA
chr12:3424306-3424912	chr12	3424306	3424912	23	NA	NA
chr12:52520190-52520842	chr12	52520190	52520842	23	NA	NA
chr12:116932992-116933625	chr12	116932992	116933625	23	NA	NA
chr12:116966810-116967340	chr12	116966810	116967340	23	NA	NA
chr12:121665010-121665660	chr12	121665010	121665660	23	NA	NA
chr12:123372910-123373560	chr12	123372910	123373560	23	NA	NA
chr13:44682397-44683068	chr13	44682397	44683068	23	NA	NA
chr13:99074632-99075279	chr13	99074632	99075279	23	NA	NA
chr14:35805741-35806357	chr14	35805741	35806357	23	NA	NA
chr14:77473840-77474781	chr14	77473840	77474781	23	NA	NA
chr14:93511401-93511978	chr14	93511401	93511978	23	NA	NA
chr14:96729701-96730605	chr14	96729701	96730605	23	NA	NA
chr14:100478153-100479181	chr14	100478153	100479181	23	NA	NA
chr14:100603466-100604094	chr14	100603466	100604094	23	NA	NA
chr14:106090675-106091516	chr14	106090675	106091516	23	NA	NA
chr15:42783082-42783736	chr15	42783082	42783736	23	NA	NA
chr15:69869118-69869736	chr15	69869118	69869736	23	NA	NA
chr15:69896232-69896786	chr15	69896232	69896786	23	NA	NA
chr15:70766930-70767599	chr15	70766930	70767599	23	NA	NA
chr16:23434698-23435375	chr16	23434698	23435375	23	NA	NA
chr16:54543101-54543753	chr16	54543101	54543753	23	NA	NA
chr16:54691353-54692122	chr16	54691353	54692122	23	NA	NA
chr16:57656401-57657645	chr16	57656401	57657645	23	NA	NA
chr16:73049451-73050053	chr16	73049451	73050053	23	NA	NA
chr16:75343722-75344349	chr16	75343722	75344349	23	NA	NA
chr16:85714820-85715353	chr16	85714820	85715353	23	NA	NA
chr16:86227151-86227872	chr16	86227151	86227872	23	NA	NA
chr17:3879841-3880532	chr17	3879841	3880532	23	NA	NA
chr17:17743388-17744108	chr17	17743388	17744108	23	NA	NA
chr17:26852104-26852809	chr17	26852104	26852809	23	NA	NA
chr17:27073170-27074528	chr17	27073170	27074528	23	NA	NA
chr17:35087319-35087913	chr17	35087319	35087913	23	NA	NA
chr17:37862003-37862628	chr17	37862003	37862628	23	NA	NA
chr17:38732267-38732914	chr17	38732267	38732914	23	NA	NA
chr17:43120386-43121213	chr17	43120386	43121213	23	NA	NA
chr17:55434710-55435745	chr17	55434710	55435745	23	NA	NA
chr17:61336009-61336645	chr17	61336009	61336645	23	NA	NA
chr17:74494070-74494670	chr17	74494070	74494670	23	NA	NA
chr18:18767851-18768485	chr18	18767851	18768485	23	NA	NA
chr18:43382598-43383298	chr18	43382598	43383298	23	NA	NA
chr18:49017901-49018518	chr18	49017901	49018518	23	NA	NA
chr18:57621448-57622011	chr18	57621448	57622011	23	NA	NA
chr19:33516392-33517034	chr19	33516392	33517034	23	NA	NA
chr19:34032580-34033231	chr19	34032580	34033231	23	NA	NA
chr19:34071117-34071742	chr19	34071117	34071742	23	NA	NA
chr19:35760389-35761048	chr19	35760389	35761048	23	NA	NA
chr19:39620930-39621521	chr19	39620930	39621521	23	NA	NA
chr2:10627197-10627755	chr2	10627197	10627755	23	NA	NA
chr2:11672347-11672984	chr2	11672347	11672984	23	NA	NA
chr2:28565176-28565751	chr2	28565176	28565751	23	NA	NA
chr2:28582047-28582647	chr2	28582047	28582647	23	NA	NA
chr2:30750634-30751247	chr2	30750634	30751247	23	NA	NA
chr2:51240063-51240681	chr2	51240063	51240681	23	NA	NA
chr2:97554097-97554733	chr2	97554097	97554733	23	NA	NA
chr2:110316034-110316631	chr2	110316034	110316631	23	NA	NA
chr2:113934247-113934797	chr2	113934247	113934797	23	NA	NA
chr2:122018047-122018786	chr2	122018047	122018786	23	NA	NA
chr2:166269553-166270153	chr2	166269553	166270153	23	NA	NA
chr2:170060334-170060933	chr2	170060334	170060933	23	NA	NA
chr2:207687803-207688397	chr2	207687803	207688397	23	NA	NA
chr20:14931192-14931817	chr20	14931192	14931817	23	NA	NA
chr20:16521764-16522351	chr20	16521764	16522351	23	NA	NA
chr20:16523043-16523655	chr20	16523043	16523655	23	NA	NA
chr20:19764503-19765148	chr20	19764503	19765148	23	NA	NA
chr20:23566951-23567528	chr20	23566951	23567528	23	NA	NA
chr20:24997843-24998445	chr20	24997843	24998445	23	NA	NA
chr20:30628348-30629003	chr20	30628348	30629003	23	NA	NA
chr20:36688164-36688714	chr20	36688164	36688714	23	NA	NA
chr20:40279024-40279648	chr20	40279024	40279648	23	NA	NA
chr20:48901112-48901753	chr20	48901112	48901753	23	NA	NA
chr20:58563047-58563614	chr20	58563047	58563614	23	NA	NA
chr21:43796336-43796948	chr21	43796336	43796948	23	NA	NA
chr21:44762847-44763444	chr21	44762847	44763444	23	NA	NA
chr21:44998550-44999177	chr21	44998550	44999177	23	NA	NA
chr22:21241636-21242280	chr22	21241636	21242280	23	NA	NA
chr22:29426552-29427136	chr22	29426552	29427136	23	NA	NA
chr22:32971386-32972018	chr22	32971386	32972018	23	NA	NA
chr22:39695883-39696587	chr22	39695883	39696587	23	NA	NA
chr22:46861440-46862221	chr22	46861440	46862221	23	NA	NA
chr3:27366123-27366749	chr3	27366123	27366749	23	NA	NA
chr3:65938936-65939566	chr3	65938936	65939566	23	NA	NA
chr3:66466363-66467086	chr3	66466363	66467086	23	NA	NA
chr3:66533613-66534283	chr3	66533613	66534283	23	NA	NA
chr3:96915823-96916624	chr3	96915823	96916624	23	NA	NA
chr3:102043166-102043815	chr3	102043166	102043815	23	NA	NA
chr3:107718123-107718815	chr3	107718123	107718815	23	NA	NA
chr3:125643506-125644115	chr3	125643506	125644115	23	NA	NA
chr3:127803165-127803749	chr3	127803165	127803749	23	NA	NA
chr3:133175653-133176816	chr3	133175653	133176816	23	NA	NA
chr3:176573628-176574186	chr3	176573628	176574186	23	NA	NA
chr3:182002523-182003163	chr3	182002523	182003163	23	NA	NA
chr3:193588128-193588784	chr3	193588128	193588784	23	NA	NA
chr3:194041573-194042092	chr3	194041573	194042092	23	NA	NA
chr3:194215628-194216246	chr3	194215628	194216246	23	NA	NA
chr4:757455-758187	chr4	757455	758187	23	NA	NA
chr4:6697363-6698211	chr4	6697363	6698211	23	NA	NA
chr4:6752563-6753171	chr4	6752563	6753171	23	NA	NA
chr4:56813236-56813854	chr4	56813236	56813854	23	NA	NA
chr4:141556804-141557354	chr4	141556804	141557354	23	NA	NA
chr4:146657452-146658063	chr4	146657452	146658063	23	NA	NA
chr4:185667686-185668462	chr4	185667686	185668462	23	NA	NA
chr4:186558353-186559061	chr4	186558353	186559061	23	NA	NA
chr5:14864308-14864958	chr5	14864308	14864958	23	NA	NA
chr5:32094092-32094674	chr5	32094092	32094674	23	NA	NA
chr5:44002579-44003222	chr5	44002579	44003222	23	NA	NA
chr5:105577142-105577783	chr5	105577142	105577783	23	NA	NA
chr5:136477608-136478279	chr5	136477608	136478279	23	NA	NA
chr5:177507707-177508292	chr5	177507707	177508292	23	NA	NA
chr6:6703859-6704463	chr6	6703859	6704463	23	NA	NA
chr6:17389468-17390069	chr6	17389468	17390069	23	NA	NA
chr6:31477759-31478322	chr6	31477759	31478322	23	NA	NA
chr6:33699669-33700227	chr6	33699669	33700227	23	NA	NA
chr6:34566370-34567078	chr6	34566370	34567078	23	NA	NA
chr6:35750081-35750727	chr6	35750081	35750727	23	NA	NA
chr6:40364178-40364877	chr6	40364178	40364877	23	NA	NA
chr6:86289259-86289827	chr6	86289259	86289827	23	NA	NA
chr6:120004113-120004676	chr6	120004113	120004676	23	NA	NA
chr6:122354462-122355086	chr6	122354462	122355086	23	NA	NA
chr6:125475863-125476477	chr6	125475863	125476477	23	NA	NA
chr6:148579884-148580477	chr6	148579884	148580477	23	NA	NA
chr6:150168070-150168628	chr6	150168070	150168628	23	NA	NA
chr7:7361187-7361820	chr7	7361187	7361820	23	NA	NA
chr7:17595834-17596437	chr7	17595834	17596437	23	NA	NA
chr7:18248541-18249184	chr7	18248541	18249184	23	NA	NA
chr7:29270437-29271074	chr7	29270437	29271074	23	NA	NA
chr7:32720085-32720737	chr7	32720085	32720737	23	NA	NA
chr7:50838885-50839541	chr7	50838885	50839541	23	NA	NA
chr7:97944865-97945392	chr7	97944865	97945392	23	NA	NA
chr8:11719900-11720544	chr8	11719900	11720544	23	NA	NA
chr8:28657250-28658079	chr8	28657250	28658079	23	NA	NA
chr8:29418465-29419050	chr8	29418465	29419050	23	NA	NA
chr8:30388850-30389534	chr8	30388850	30389534	23	NA	NA
chr8:37548783-37549431	chr8	37548783	37549431	23	NA	NA
chr8:66934286-66935029	chr8	66934286	66935029	23	NA	NA
chr8:66938640-66939279	chr8	66938640	66939279	23	NA	NA
chr8:98020918-98021576	chr8	98020918	98021576	23	NA	NA
chr8:103822626-103823328	chr8	103822626	103823328	23	NA	NA
chr8:120667271-120667771	chr8	120667271	120667771	23	NA	NA
chr9:80278576-80279202	chr9	80278576	80279202	23	NA	NA
chr9:87404176-87404826	chr9	87404176	87404826	23	NA	NA
chr9:92270846-92271474	chr9	92270846	92271474	23	NA	NA
chr9:140067352-140068143	chr9	140067352	140068143	23	NA	NA
chrX:2409559-2410199	chrX	2409559	2410199	23	NA	NA
chrX:37764009-37764604	chrX	37764009	37764604	23	NA	NA
chrX:109416302-109416915	chrX	109416302	109416915	23	NA	NA
chr5:55964829-55965633	chr5	55964829	55965633	22	rs889310:55965167:C:T	3.742e-09
chr9:110303702-110304300	chr9	110303702	110304300	22	rs60037937:110303808:TAA:T	7.558e-26
chr1:9363012-9363655	chr1	9363012	9363655	22	NA	NA
chr1:15303673-15304266	chr1	15303673	15304266	22	NA	NA
chr1:17563762-17564467	chr1	17563762	17564467	22	NA	NA
chr1:19753512-19754204	chr1	19753512	19754204	22	NA	NA
chr1:21568101-21568702	chr1	21568101	21568702	22	NA	NA
chr1:25893004-25893755	chr1	25893004	25893755	22	NA	NA
chr1:31731417-31732012	chr1	31731417	31732012	22	NA	NA
chr1:32798081-32798901	chr1	32798081	32798901	22	NA	NA
chr1:36669531-36670254	chr1	36669531	36670254	22	NA	NA
chr1:41385012-41385604	chr1	41385012	41385604	22	NA	NA
chr1:45982367-45983153	chr1	45982367	45983153	22	NA	NA
chr1:51953863-51954524	chr1	51953863	51954524	22	NA	NA
chr1:117161704-117162262	chr1	117161704	117162262	22	NA	NA
chr1:118132803-118133323	chr1	118132803	118133323	22	NA	NA
chr1:177417832-177418453	chr1	177417832	177418453	22	NA	NA
chr1:184591403-184592031	chr1	184591403	184592031	22	NA	NA
chr1:204732701-204733305	chr1	204732701	204733305	22	NA	NA
chr1:206862176-206862753	chr1	206862176	206862753	22	NA	NA
chr1:207016926-207017504	chr1	207016926	207017504	22	NA	NA
chr1:207082503-207083362	chr1	207082503	207083362	22	NA	NA
chr1:226063003-226063726	chr1	226063003	226063726	22	NA	NA
chr1:234588251-234588805	chr1	234588251	234588805	22	NA	NA
chr1:235011273-235011754	chr1	235011273	235011754	22	NA	NA
chr1:245118712-245119351	chr1	245118712	245119351	22	NA	NA
chr1:245209983-245210562	chr1	245209983	245210562	22	NA	NA
chr10:5530160-5530904	chr10	5530160	5530904	22	NA	NA
chr10:5545347-5545975	chr10	5545347	5545975	22	NA	NA
chr10:6196623-6197214	chr10	6196623	6197214	22	NA	NA
chr10:65471847-65472464	chr10	65471847	65472464	22	NA	NA
chr10:71181561-71182186	chr10	71181561	71182186	22	NA	NA
chr10:73068657-73069257	chr10	73068657	73069257	22	NA	NA
chr10:74091254-74092149	chr10	74091254	74092149	22	NA	NA
chr10:80274554-80275214	chr10	80274554	80275214	22	NA	NA
chr10:93882694-93883286	chr10	93882694	93883286	22	NA	NA
chr10:125503386-125503994	chr10	125503386	125503994	22	NA	NA
chr10:129174468-129175094	chr10	129174468	129175094	22	NA	NA
chr11:2214381-2215057	chr11	2214381	2215057	22	NA	NA
chr11:3916181-3916719	chr11	3916181	3916719	22	NA	NA
chr11:9110531-9111343	chr11	9110531	9111343	22	NA	NA
chr11:19940681-19941331	chr11	19940681	19941331	22	NA	NA
chr11:34689526-34690221	chr11	34689526	34690221	22	NA	NA
chr11:45168556-45169233	chr11	45168556	45169233	22	NA	NA
chr11:60648266-60648931	chr11	60648266	60648931	22	NA	NA
chr11:86382328-86383106	chr11	86382328	86383106	22	NA	NA
chr11:114049883-114050494	chr11	114049883	114050494	22	NA	NA
chr11:116706831-116707383	chr11	116706831	116707383	22	NA	NA
chr12:6387439-6388162	chr12	6387439	6388162	22	NA	NA
chr12:57495512-57496192	chr12	57495512	57496192	22	NA	NA
chr12:76099906-76100612	chr12	76099906	76100612	22	NA	NA
chr12:94207760-94208492	chr12	94207760	94208492	22	NA	NA
chr12:116736862-116737725	chr12	116736862	116737725	22	NA	NA
chr12:120124175-120124842	chr12	120124175	120124842	22	NA	NA
chr12:120154140-120154856	chr12	120154140	120154856	22	NA	NA
chr13:29017004-29017665	chr13	29017004	29017665	22	NA	NA
chr13:99302468-99303079	chr13	99302468	99303079	22	NA	NA
chr14:28380724-28381341	chr14	28380724	28381341	22	NA	NA
chr14:73993044-73993775	chr14	73993044	73993775	22	NA	NA
chr14:76002105-76002744	chr14	76002105	76002744	22	NA	NA
chr14:79791299-79791891	chr14	79791299	79791891	22	NA	NA
chr14:93601670-93602294	chr14	93601670	93602294	22	NA	NA
chr14:94787644-94788251	chr14	94787644	94788251	22	NA	NA
chr14:94797101-94797694	chr14	94797101	94797694	22	NA	NA
chr14:100045124-100045907	chr14	100045124	100045907	22	NA	NA
chr14:106134544-106135249	chr14	106134544	106135249	22	NA	NA
chr15:70616087-70616951	chr15	70616087	70616951	22	NA	NA
chr15:70670379-70670957	chr15	70670379	70670957	22	NA	NA
chr15:74890518-74891159	chr15	74890518	74891159	22	NA	NA
chr15:80455482-80456086	chr15	80455482	80456086	22	NA	NA
chr15:90388509-90389201	chr15	90388509	90389201	22	NA	NA
chr15:96879968-96880680	chr15	96879968	96880680	22	NA	NA
chr16:10627321-10627955	chr16	10627321	10627955	22	NA	NA
chr16:11221670-11222405	chr16	11221670	11222405	22	NA	NA
chr16:11799899-11800503	chr16	11799899	11800503	22	NA	NA
chr16:15581542-15582249	chr16	15581542	15582249	22	NA	NA
chr16:46936194-46936801	chr16	46936194	46936801	22	NA	NA
chr16:50163298-50163854	chr16	50163298	50163854	22	NA	NA
chr16:53164295-53165087	chr16	53164295	53165087	22	NA	NA
chr16:67475072-67475703	chr16	67475072	67475703	22	NA	NA
chr16:67495653-67496351	chr16	67495653	67496351	22	NA	NA
chr16:68741601-68742222	chr16	68741601	68742222	22	NA	NA
chr16:75087699-75088548	chr16	75087699	75088548	22	NA	NA
chr16:85322472-85323053	chr16	85322472	85323053	22	NA	NA
chr16:85384501-85385087	chr16	85384501	85385087	22	NA	NA
chr16:88831301-88831886	chr16	88831301	88831886	22	NA	NA
chr17:8059495-8060320	chr17	8059495	8060320	22	NA	NA
chr17:9110167-9110682	chr17	9110167	9110682	22	NA	NA
chr17:17634178-17634778	chr17	17634178	17634778	22	NA	NA
chr17:29981970-29982514	chr17	29981970	29982514	22	NA	NA
chr17:41438245-41439038	chr17	41438245	41439038	22	NA	NA
chr17:48992395-48992995	chr17	48992395	48992995	22	NA	NA
chr17:57914695-57915446	chr17	57914695	57915446	22	NA	NA
chr17:71201588-71202209	chr17	71201588	71202209	22	NA	NA
chr17:76392838-76393382	chr17	76392838	76393382	22	NA	NA
chr17:77892763-77893370	chr17	77892763	77893370	22	NA	NA
chr17:79367564-79368217	chr17	79367564	79368217	22	NA	NA
chr18:13425614-13426269	chr18	13425614	13426269	22	NA	NA
chr18:20493714-20494301	chr18	20493714	20494301	22	NA	NA
chr18:22748494-22749144	chr18	22748494	22749144	22	NA	NA
chr18:43631904-43632502	chr18	43631904	43632502	22	NA	NA
chr18:46500861-46501468	chr18	46500861	46501468	22	NA	NA
chr19:488667-489587	chr19	488667	489587	22	NA	NA
chr19:934830-935437	chr19	934830	935437	22	NA	NA
chr19:1166687-1167337	chr19	1166687	1167337	22	NA	NA
chr19:1871094-1871689	chr19	1871094	1871689	22	NA	NA
chr19:3384787-3385371	chr19	3384787	3385371	22	NA	NA
chr19:7463587-7464148	chr19	7463587	7464148	22	NA	NA
chr19:11454967-11455581	chr19	11454967	11455581	22	NA	NA
chr19:18873098-18873798	chr19	18873098	18873798	22	NA	NA
chr19:18880080-18880731	chr19	18880080	18880731	22	NA	NA
chr19:24005517-24006094	chr19	24005517	24006094	22	NA	NA
chr19:33192934-33193487	chr19	33192934	33193487	22	NA	NA
chr19:34120331-34120984	chr19	34120331	34120984	22	NA	NA
chr19:35762271-35762848	chr19	35762271	35762848	22	NA	NA
chr19:45372037-45372634	chr19	45372037	45372634	22	NA	NA
chr19:48565871-48566448	chr19	48565871	48566448	22	NA	NA
chr19:51547471-51548116	chr19	51547471	51548116	22	NA	NA
chr19:58350025-58350694	chr19	58350025	58350694	22	NA	NA
chr19:58358417-58358944	chr19	58358417	58358944	22	NA	NA
chr2:47184105-47184747	chr2	47184105	47184747	22	NA	NA
chr2:47197797-47198383	chr2	47197797	47198383	22	NA	NA
chr2:64977933-64979047	chr2	64977933	64979047	22	NA	NA
chr2:65202386-65202936	chr2	65202386	65202936	22	NA	NA
chr2:100684226-100684955	chr2	100684226	100684955	22	NA	NA
chr2:101944182-101944805	chr2	101944182	101944805	22	NA	NA
chr2:106071484-106072647	chr2	106071484	106072647	22	NA	NA
chr2:118715198-118716186	chr2	118715198	118716186	22	NA	NA
chr2:129039384-129039998	chr2	129039384	129039998	22	NA	NA
chr2:129861705-129862397	chr2	129861705	129862397	22	NA	NA
chr2:201651083-201651784	chr2	201651083	201651784	22	NA	NA
chr2:236956526-236957134	chr2	236956526	236957134	22	NA	NA
chr2:238404983-238405503	chr2	238404983	238405503	22	NA	NA
chr20:3792243-3792928	chr20	3792243	3792928	22	NA	NA
chr20:25262240-25262753	chr20	25262240	25262753	22	NA	NA
chr21:44850572-44851324	chr21	44850572	44851324	22	NA	NA
chr22:24699159-24699834	chr22	24699159	24699834	22	NA	NA
chr22:24922053-24922656	chr22	24922053	24922656	22	NA	NA
chr22:24927930-24928556	chr22	24927930	24928556	22	NA	NA
chr22:32975621-32976405	chr22	32975621	32976405	22	NA	NA
chr22:46773418-46773940	chr22	46773418	46773940	22	NA	NA
chr22:47870590-47871168	chr22	47870590	47871168	22	NA	NA
chr22:50344736-50345390	chr22	50344736	50345390	22	NA	NA
chr3:8359623-8360228	chr3	8359623	8360228	22	NA	NA
chr3:9140273-9140865	chr3	9140273	9140865	22	NA	NA
chr3:46708016-46708564	chr3	46708016	46708564	22	NA	NA
chr3:47485030-47485649	chr3	47485030	47485649	22	NA	NA
chr3:66525865-66526524	chr3	66525865	66526524	22	NA	NA
chr3:72677215-72677786	chr3	72677215	72677786	22	NA	NA
chr3:104329813-104330596	chr3	104329813	104330596	22	NA	NA
chr3:153942124-153942665	chr3	153942124	153942665	22	NA	NA
chr3:174854315-174854928	chr3	174854315	174854928	22	NA	NA
chr3:176586013-176586636	chr3	176586013	176586636	22	NA	NA
chr3:188665573-188666339	chr3	188665573	188666339	22	NA	NA
chr4:1814553-1815312	chr4	1814553	1815312	22	NA	NA
chr4:3463011-3463811	chr4	3463011	3463811	22	NA	NA
chr4:6634813-6635453	chr4	6634813	6635453	22	NA	NA
chr4:6751103-6751713	chr4	6751103	6751713	22	NA	NA
chr4:6919404-6919940	chr4	6919404	6919940	22	NA	NA
chr4:41079605-41080161	chr4	41079605	41080161	22	NA	NA
chr4:84572504-84573162	chr4	84572504	84573162	22	NA	NA
chr4:141641758-141642362	chr4	141641758	141642362	22	NA	NA
chr4:143536355-143537011	chr4	143536355	143537011	22	NA	NA
chr4:158284403-158285090	chr4	158284403	158285090	22	NA	NA
chr4:163571852-163572490	chr4	163571852	163572490	22	NA	NA
chr4:173883761-173884605	chr4	173883761	173884605	22	NA	NA
chr5:1555358-1555958	chr5	1555358	1555958	22	NA	NA
chr5:10288759-10289358	chr5	10288759	10289358	22	NA	NA
chr5:28505079-28505759	chr5	28505079	28505759	22	NA	NA
chr5:55717758-55718629	chr5	55717758	55718629	22	NA	NA
chr5:60629264-60629959	chr5	60629264	60629959	22	NA	NA
chr5:77157379-77157942	chr5	77157379	77157942	22	NA	NA
chr5:137150907-137151642	chr5	137150907	137151642	22	NA	NA
chr5:147309767-147310409	chr5	147309767	147310409	22	NA	NA
chr5:172962403-172963274	chr5	172962403	172963274	22	NA	NA
chr5:173017892-173018459	chr5	173017892	173018459	22	NA	NA
chr6:6748711-6749559	chr6	6748711	6749559	22	NA	NA
chr6:7480077-7480734	chr6	7480077	7480734	22	NA	NA
chr6:22141378-22142059	chr6	22141378	22142059	22	NA	NA
chr6:35569369-35570169	chr6	35569369	35570169	22	NA	NA
chr6:43766509-43767078	chr6	43766509	43767078	22	NA	NA
chr6:43878370-43879019	chr6	43878370	43879019	22	NA	NA
chr6:45643309-45643962	chr6	45643309	45643962	22	NA	NA
chr6:106582868-106583486	chr6	106582868	106583486	22	NA	NA
chr6:109005969-109006577	chr6	109005969	109006577	22	NA	NA
chr6:125518877-125519524	chr6	125518877	125519524	22	NA	NA
chr6:133252845-133253474	chr6	133252845	133253474	22	NA	NA
chr6:149775481-149776078	chr6	149775481	149776078	22	NA	NA
chr6:168853528-168854119	chr6	168853528	168854119	22	NA	NA
chr7:16920087-16920643	chr7	16920087	16920643	22	NA	NA
chr7:33885735-33886334	chr7	33885735	33886334	22	NA	NA
chr7:47510134-47510890	chr7	47510134	47510890	22	NA	NA
chr7:47581538-47582137	chr7	47581538	47582137	22	NA	NA
chr7:51424641-51425293	chr7	51424641	51425293	22	NA	NA
chr7:55244824-55245793	chr7	55244824	55245793	22	NA	NA
chr7:64099683-64100324	chr7	64099683	64100324	22	NA	NA
chr7:98693637-98694237	chr7	98693637	98694237	22	NA	NA
chr7:115318034-115318593	chr7	115318034	115318593	22	NA	NA
chr7:129588686-129589435	chr7	129588686	129589435	22	NA	NA
chr7:141395533-141396191	chr7	141395533	141396191	22	NA	NA
chr8:21970086-21970761	chr8	21970086	21970761	22	NA	NA
chr8:26059565-26060236	chr8	26059565	26060236	22	NA	NA
chr8:39912126-39912764	chr8	39912126	39912764	22	NA	NA
chr8:59032279-59032879	chr8	59032279	59032879	22	NA	NA
chr8:69494470-69495136	chr8	69494470	69495136	22	NA	NA
chr8:86919676-86920186	chr8	86919676	86920186	22	NA	NA
chr8:101499926-101500550	chr8	101499926	101500550	22	NA	NA
chr8:117336918-117337570	chr8	117336918	117337570	22	NA	NA
chr8:119395365-119396071	chr8	119395365	119396071	22	NA	NA
chr8:122163061-122163683	chr8	122163061	122163683	22	NA	NA
chr8:129103179-129103783	chr8	129103179	129103783	22	NA	NA
chr8:133910976-133911670	chr8	133910976	133911670	22	NA	NA
chr9:7146893-7147530	chr9	7146893	7147530	22	NA	NA
chr9:33329050-33329643	chr9	33329050	33329643	22	NA	NA
chr9:77715883-77716499	chr9	77715883	77716499	22	NA	NA
chr9:87604950-87605674	chr9	87604950	87605674	22	NA	NA
chr9:92458293-92458947	chr9	92458293	92458947	22	NA	NA
chr9:108132230-108132841	chr9	108132230	108132841	22	NA	NA
chr9:115147026-115147624	chr9	115147026	115147624	22	NA	NA
chr9:120162341-120162997	chr9	120162341	120162997	22	NA	NA
chrX:9974959-9975636	chrX	9974959	9975636	22	NA	NA
chrX:71588616-71589202	chrX	71588616	71589202	22	NA	NA
chrX:104217317-104217967	chrX	104217317	104217967	22	NA	NA
chrX:109195099-109195665	chrX	109195099	109195665	22	NA	NA
chrX:152083867-152084486	chrX	152083867	152084486	22	NA	NA
chr16:80647742-80648353	chr16	80647742	80648353	21	rs9938021:80648048:C:G	3.71e-21
chr21:16572028-16572804	chr21	16572028	16572804	21	rs7276622:16572276:G:A	2.721e-30
chr1:10103-10673	chr1	10103	10673	21	NA	NA
chr1:1368362-1369065	chr1	1368362	1369065	21	NA	NA
chr1:8229803-8230573	chr1	8229803	8230573	21	NA	NA
chr1:10805953-10806465	chr1	10805953	10806465	21	NA	NA
chr1:17855854-17856481	chr1	17855854	17856481	21	NA	NA
chr1:21650783-21651416	chr1	21650783	21651416	21	NA	NA
chr1:25785254-25785916	chr1	25785254	25785916	21	NA	NA
chr1:31669453-31670003	chr1	31669453	31670003	21	NA	NA
chr1:34125854-34126551	chr1	34125854	34126551	21	NA	NA
chr1:39608354-39608915	chr1	39608354	39608915	21	NA	NA
chr1:45984851-45985512	chr1	45984851	45985512	21	NA	NA
chr1:47496603-47497155	chr1	47496603	47497155	21	NA	NA
chr1:54953781-54954394	chr1	54953781	54954394	21	NA	NA
chr1:55480681-55481362	chr1	55480681	55481362	21	NA	NA
chr1:86296051-86296855	chr1	86296051	86296855	21	NA	NA
chr1:116255623-116256304	chr1	116255623	116256304	21	NA	NA
chr1:117811453-117812031	chr1	117811453	117812031	21	NA	NA
chr1:118174903-118175515	chr1	118174903	118175515	21	NA	NA
chr1:175156201-175156817	chr1	175156201	175156817	21	NA	NA
chr1:182110103-182110655	chr1	182110103	182110655	21	NA	NA
chr1:182213476-182214054	chr1	182213476	182214054	21	NA	NA
chr1:184342154-184342755	chr1	184342154	184342755	21	NA	NA
chr1:184601823-184602405	chr1	184601823	184602405	21	NA	NA
chr1:201464505-201465504	chr1	201464505	201465504	21	NA	NA
chr1:207489753-207490403	chr1	207489753	207490403	21	NA	NA
chr1:208649831-208650554	chr1	208649831	208650554	21	NA	NA
chr1:210540153-210540776	chr1	210540153	210540776	21	NA	NA
chr1:210650604-210651255	chr1	210650604	210651255	21	NA	NA
chr1:212659354-212660004	chr1	212659354	212660004	21	NA	NA
chr1:213248262-213248935	chr1	213248262	213248935	21	NA	NA
chr1:229364903-229365953	chr1	229364903	229365953	21	NA	NA
chr1:230893762-230894405	chr1	230893762	230894405	21	NA	NA
chr10:1310986-1311599	chr10	1310986	1311599	21	NA	NA
chr10:3509654-3510849	chr10	3509654	3510849	21	NA	NA
chr10:3948768-3949364	chr10	3948768	3949364	21	NA	NA
chr10:4321775-4322375	chr10	4321775	4322375	21	NA	NA
chr10:6205475-6206161	chr10	6205475	6206161	21	NA	NA
chr10:27271007-27271564	chr10	27271007	27271564	21	NA	NA
chr10:28545707-28546294	chr10	28545707	28546294	21	NA	NA
chr10:45137394-45138013	chr10	45137394	45138013	21	NA	NA
chr10:49495847-49496524	chr10	49495847	49496524	21	NA	NA
chr10:61791204-61791773	chr10	61791204	61791773	21	NA	NA
chr10:63169557-63170161	chr10	63169557	63170161	21	NA	NA
chr10:79625397-79626111	chr10	79625397	79626111	21	NA	NA
chr10:102101611-102102223	chr10	102101611	102102223	21	NA	NA
chr10:104470407-104470957	chr10	104470407	104470957	21	NA	NA
chr10:104534021-104534564	chr10	104534021	104534564	21	NA	NA
chr10:104573694-104574511	chr10	104573694	104574511	21	NA	NA
chr11:2933532-2934281	chr11	2933532	2934281	21	NA	NA
chr11:11476133-11476856	chr11	11476133	11476856	21	NA	NA
chr11:17008617-17009183	chr11	17008617	17009183	21	NA	NA
chr11:30543103-30543681	chr11	30543103	30543681	21	NA	NA
chr11:44165413-44166145	chr11	44165413	44166145	21	NA	NA
chr11:63325906-63326683	chr11	63325906	63326683	21	NA	NA
chr11:68890119-68890783	chr11	68890119	68890783	21	NA	NA
chr11:69469194-69469933	chr11	69469194	69469933	21	NA	NA
chr11:69952232-69952895	chr11	69952232	69952895	21	NA	NA
chr11:76371719-76372383	chr11	76371719	76372383	21	NA	NA
chr11:122966974-122967683	chr11	122966974	122967683	21	NA	NA
chr11:129194271-129194933	chr11	129194271	129194933	21	NA	NA
chr11:129565729-129566329	chr11	129565729	129566329	21	NA	NA
chr11:130299732-130300383	chr11	130299732	130300383	21	NA	NA
chr12:14972875-14973475	chr12	14972875	14973475	21	NA	NA
chr12:15426757-15427376	chr12	15426757	15427376	21	NA	NA
chr12:31902106-31902675	chr12	31902106	31902675	21	NA	NA
chr12:49581640-49582245	chr12	49581640	49582245	21	NA	NA
chr12:50197605-50198210	chr12	50197605	50198210	21	NA	NA
chr12:94955741-94956310	chr12	94955741	94956310	21	NA	NA
chr12:102009690-102010360	chr12	102009690	102010360	21	NA	NA
chr12:103569321-103569875	chr12	103569321	103569875	21	NA	NA
chr12:115539707-115540292	chr12	115539707	115540292	21	NA	NA
chr12:123547375-123547995	chr12	123547375	123547995	21	NA	NA
chr12:123849226-123850156	chr12	123849226	123850156	21	NA	NA
chr12:125211791-125212390	chr12	125211791	125212390	21	NA	NA
chr12:125215106-125215742	chr12	125215106	125215742	21	NA	NA
chr13:52493625-52494179	chr13	52493625	52494179	21	NA	NA
chr13:82879704-82880277	chr13	82879704	82880277	21	NA	NA
chr13:98530415-98531164	chr13	98530415	98531164	21	NA	NA
chr13:110228518-110229145	chr13	110228518	110229145	21	NA	NA
chr13:114301577-114302278	chr13	114301577	114302278	21	NA	NA
chr14:50467649-50468569	chr14	50467649	50468569	21	NA	NA
chr14:77385201-77386025	chr14	77385201	77386025	21	NA	NA
chr14:77577399-77577955	chr14	77577399	77577955	21	NA	NA
chr14:96562094-96562703	chr14	96562094	96562703	21	NA	NA
chr14:96661403-96662207	chr14	96661403	96662207	21	NA	NA
chr14:106207774-106208451	chr14	106207774	106208451	21	NA	NA
chr15:50456553-50457182	chr15	50456553	50457182	21	NA	NA
chr15:61044668-61045251	chr15	61044668	61045251	21	NA	NA
chr15:75063230-75063751	chr15	75063230	75063751	21	NA	NA
chr15:83611268-83611901	chr15	83611268	83611901	21	NA	NA
chr15:89658707-89659268	chr15	89658707	89659268	21	NA	NA
chr15:90236709-90237321	chr15	90236709	90237321	21	NA	NA
chr15:90379980-90381044	chr15	90379980	90381044	21	NA	NA
chr15:92115209-92115809	chr15	92115209	92115809	21	NA	NA
chr16:11847748-11848587	chr16	11847748	11848587	21	NA	NA
chr16:14191003-14191736	chr16	14191003	14191736	21	NA	NA
chr16:15583105-15583748	chr16	15583105	15583748	21	NA	NA
chr16:17067649-17068403	chr16	17067649	17068403	21	NA	NA
chr16:22243921-22244553	chr16	22243921	22244553	21	NA	NA
chr16:23386101-23386701	chr16	23386101	23386701	21	NA	NA
chr16:54683495-54684203	chr16	54683495	54684203	21	NA	NA
chr16:75351901-75352453	chr16	75351901	75352453	21	NA	NA
chr16:85603895-85604571	chr16	85603895	85604571	21	NA	NA
chr17:3562809-3563682	chr17	3562809	3563682	21	NA	NA
chr17:7959589-7960320	chr17	7959589	7960320	21	NA	NA
chr17:8057478-8058070	chr17	8057478	8058070	21	NA	NA
chr17:13909789-13910356	chr17	13909789	13910356	21	NA	NA
chr17:16826082-16826620	chr17	16826082	16826620	21	NA	NA
chr17:27954845-27955404	chr17	27954845	27955404	21	NA	NA
chr17:46127770-46128304	chr17	46127770	46128304	21	NA	NA
chr17:47964503-47965338	chr17	47964503	47965338	21	NA	NA
chr17:60882069-60882669	chr17	60882069	60882669	21	NA	NA
chr17:77871313-77871864	chr17	77871313	77871864	21	NA	NA
chr17:78734313-78734928	chr17	78734313	78734928	21	NA	NA
chr17:80479808-80480320	chr17	80479808	80480320	21	NA	NA
chr18:24322551-24323105	chr18	24322551	24323105	21	NA	NA
chr18:43006794-43007361	chr18	43006794	43007361	21	NA	NA
chr18:55464123-55464818	chr18	55464123	55464818	21	NA	NA
chr19:454784-455398	chr19	454784	455398	21	NA	NA
chr19:2154480-2155037	chr19	2154480	2155037	21	NA	NA
chr19:2491080-2491821	chr19	2491080	2491821	21	NA	NA
chr19:2950221-2950981	chr19	2950221	2950981	21	NA	NA
chr19:3429580-3430192	chr19	3429580	3430192	21	NA	NA
chr19:4939381-4939898	chr19	4939381	4939898	21	NA	NA
chr19:5572494-5573080	chr19	5572494	5573080	21	NA	NA
chr19:13019321-13019937	chr19	13019321	13019937	21	NA	NA
chr19:18490837-18491598	chr19	18490837	18491598	21	NA	NA
chr19:18852431-18853155	chr19	18852431	18853155	21	NA	NA
chr19:18943381-18943981	chr19	18943381	18943981	21	NA	NA
chr19:19488530-19489130	chr19	19488530	19489130	21	NA	NA
chr19:38422830-38423484	chr19	38422830	38423484	21	NA	NA
chr19:38781342-38782071	chr19	38781342	38782071	21	NA	NA
chr19:45362294-45362905	chr19	45362294	45362905	21	NA	NA
chr19:45954030-45954621	chr19	45954030	45954621	21	NA	NA
chr2:8640534-8641205	chr2	8640534	8641205	21	NA	NA
chr2:9308147-9308739	chr2	9308147	9308739	21	NA	NA
chr2:33295097-33295697	chr2	33295097	33295697	21	NA	NA
chr2:46136681-46137297	chr2	46136681	46137297	21	NA	NA
chr2:49533953-49534541	chr2	49533953	49534541	21	NA	NA
chr2:62642236-62642888	chr2	62642236	62642888	21	NA	NA
chr2:64500684-64501333	chr2	64500684	64501333	21	NA	NA
chr2:69173184-69173839	chr2	69173184	69173839	21	NA	NA
chr2:86181736-86182597	chr2	86181736	86182597	21	NA	NA
chr2:101696634-101697305	chr2	101696634	101697305	21	NA	NA
chr2:110402076-110402705	chr2	110402076	110402705	21	NA	NA
chr2:113346026-113346747	chr2	113346026	113346747	21	NA	NA
chr2:120095231-120095826	chr2	120095231	120095826	21	NA	NA
chr2:130672011-130672661	chr2	130672011	130672661	21	NA	NA
chr2:130952684-130953451	chr2	130952684	130953451	21	NA	NA
chr2:132236247-132236988	chr2	132236247	132236988	21	NA	NA
chr2:147085094-147085755	chr2	147085094	147085755	21	NA	NA
chr2:157038534-157039147	chr2	157038534	157039147	21	NA	NA
chr2:197157026-197157586	chr2	197157026	197157586	21	NA	NA
chr2:218112105-218112644	chr2	218112105	218112644	21	NA	NA
chr2:220263484-220264086	chr2	220263484	220264086	21	NA	NA
chr2:223885983-223886551	chr2	223885983	223886551	21	NA	NA
chr2:237895076-237895684	chr2	237895076	237895684	21	NA	NA
chr2:240189833-240190501	chr2	240189833	240190501	21	NA	NA
chr20:5162245-5162962	chr20	5162245	5162962	21	NA	NA
chr20:17909019-17909692	chr20	17909019	17909692	21	NA	NA
chr20:25260643-25261253	chr20	25260643	25261253	21	NA	NA
chr20:25534405-25534951	chr20	25534405	25534951	21	NA	NA
chr20:44002290-44002897	chr20	44002290	44002897	21	NA	NA
chr20:48853853-48854401	chr20	48853853	48854401	21	NA	NA
chr22:30788840-30789453	chr22	30788840	30789453	21	NA	NA
chr22:35661153-35661803	chr22	35661153	35661803	21	NA	NA
chr22:35934490-35935118	chr22	35934490	35935118	21	NA	NA
chr22:43200740-43201636	chr22	43200740	43201636	21	NA	NA
chr22:43689586-43690303	chr22	43689586	43690303	21	NA	NA
chr22:48873062-48873680	chr22	48873062	48873680	21	NA	NA
chr22:50835333-50835952	chr22	50835333	50835952	21	NA	NA
chr3:4755603-4756224	chr3	4755603	4756224	21	NA	NA
chr3:5230522-5231065	chr3	5230522	5231065	21	NA	NA
chr3:14476213-14476971	chr3	14476213	14476971	21	NA	NA
chr3:22905428-22906036	chr3	22905428	22906036	21	NA	NA
chr3:42585957-42586649	chr3	42585957	42586649	21	NA	NA
chr3:50221615-50222199	chr3	50221615	50222199	21	NA	NA
chr3:53552986-53553813	chr3	53552986	53553813	21	NA	NA
chr3:65910814-65911473	chr3	65910814	65911473	21	NA	NA
chr3:156355383-156356003	chr3	156355383	156356003	21	NA	NA
chr3:188657723-188658299	chr3	188657723	188658299	21	NA	NA
chr4:6958786-6959405	chr4	6958786	6959405	21	NA	NA
chr4:17702355-17703158	chr4	17702355	17703158	21	NA	NA
chr4:40365362-40366021	chr4	40365362	40366021	21	NA	NA
chr4:97622984-97623536	chr4	97622984	97623536	21	NA	NA
chr4:158067355-158067907	chr4	158067355	158067907	21	NA	NA
chr5:32233799-32234458	chr5	32233799	32234458	21	NA	NA
chr5:32563557-32564172	chr5	32563557	32564172	21	NA	NA
chr5:33537308-33537942	chr5	33537308	33537942	21	NA	NA
chr5:41432692-41433330	chr5	41432692	41433330	21	NA	NA
chr5:52385042-52385667	chr5	52385042	52385667	21	NA	NA
chr5:106897479-106898042	chr5	106897479	106898042	21	NA	NA
chr5:124242007-124242759	chr5	124242007	124242759	21	NA	NA
chr5:128464779-128465314	chr5	128464779	128465314	21	NA	NA
chr5:131762974-131763564	chr5	131762974	131763564	21	NA	NA
chr5:136108445-136109109	chr5	136108445	136109109	21	NA	NA
chr5:141660529-141661153	chr5	141660529	141661153	21	NA	NA
chr5:172331607-172332314	chr5	172331607	172332314	21	NA	NA
chr5:177551157-177551764	chr5	177551157	177551764	21	NA	NA
chr6:3670020-3670631	chr6	3670020	3670631	21	NA	NA
chr6:3913709-3914463	chr6	3913709	3914463	21	NA	NA
chr6:6678651-6679570	chr6	6678651	6679570	21	NA	NA
chr6:14758669-14759278	chr6	14758669	14759278	21	NA	NA
chr6:20200836-20201484	chr6	20200836	20201484	21	NA	NA
chr6:30758590-30759175	chr6	30758590	30759175	21	NA	NA
chr6:33265324-33265961	chr6	33265324	33265961	21	NA	NA
chr6:33684920-33685533	chr6	33684920	33685533	21	NA	NA
chr6:33689276-33690028	chr6	33689276	33690028	21	NA	NA
chr6:33726620-33727409	chr6	33726620	33727409	21	NA	NA
chr6:37537528-37538128	chr6	37537528	37538128	21	NA	NA
chr6:91379474-91380078	chr6	91379474	91380078	21	NA	NA
chr6:99658577-99659274	chr6	99658577	99659274	21	NA	NA
chr6:135503551-135504327	chr6	135503551	135504327	21	NA	NA
chr6:135575504-135576069	chr6	135575504	135576069	21	NA	NA
chr6:138903578-138904227	chr6	138903578	138904227	21	NA	NA
chr6:158406901-158407584	chr6	158406901	158407584	21	NA	NA
chr6:158410719-158411327	chr6	158410719	158411327	21	NA	NA
chr6:168789419-168790076	chr6	168789419	168790076	21	NA	NA
chr7:214387-215041	chr7	214387	215041	21	NA	NA
chr7:4871486-4872193	chr7	4871486	4872193	21	NA	NA
chr7:7458885-7459543	chr7	7458885	7459543	21	NA	NA
chr7:22429085-22429742	chr7	22429085	22429742	21	NA	NA
chr7:23374185-23374736	chr7	23374185	23374736	21	NA	NA
chr7:34787834-34788393	chr7	34787834	34788393	21	NA	NA
chr7:35064934-35065692	chr7	35064934	35065692	21	NA	NA
chr7:36312374-36312991	chr7	36312374	36312991	21	NA	NA
chr7:42332489-42333237	chr7	42332489	42333237	21	NA	NA
chr7:64940534-64941136	chr7	64940534	64941136	21	NA	NA
chr7:73305535-73306236	chr7	73305535	73306236	21	NA	NA
chr7:74049787-74050435	chr7	74049787	74050435	21	NA	NA
chr7:142827536-142828135	chr7	142827536	142828135	21	NA	NA
chr7:142998174-142998835	chr7	142998174	142998835	21	NA	NA
chr7:148901236-148901893	chr7	148901236	148901893	21	NA	NA
chr8:8318736-8319452	chr8	8318736	8319452	21	NA	NA
chr8:17187086-17187727	chr8	17187086	17187727	21	NA	NA
chr8:21987136-21987786	chr8	21987136	21987786	21	NA	NA
chr8:29595894-29596486	chr8	29595894	29596486	21	NA	NA
chr8:61564268-61565033	chr8	61564268	61565033	21	NA	NA
chr8:80996383-80996964	chr8	80996383	80996964	21	NA	NA
chr8:81169183-81169850	chr8	81169183	81169850	21	NA	NA
chr8:116999936-117000633	chr8	116999936	117000633	21	NA	NA
chr8:134438776-134439429	chr8	134438776	134439429	21	NA	NA
chr8:144137064-144137718	chr8	144137064	144137718	21	NA	NA
chr9:4858852-4859450	chr9	4858852	4859450	21	NA	NA
chr9:82104402-82105041	chr9	82104402	82105041	21	NA	NA
chr9:92284126-92284752	chr9	92284126	92284752	21	NA	NA
chr9:102581852-102582497	chr9	102581852	102582497	21	NA	NA
chr9:140091046-140091643	chr9	140091046	140091643	21	NA	NA
chrX:39754299-39754952	chrX	39754299	39754952	21	NA	NA
chrX:54667149-54667704	chrX	54667149	54667704	21	NA	NA
chrX:71601599-71602278	chrX	71601599	71602278	21	NA	NA
chr10:80888244-80888906	chr10	80888244	80888906	20	10:80888588:A:AAAAAG	1.682e-14
chr12:115836056-115836645	chr12	115836056	115836645	20	12:115836059:C:T	8.779e-39
chr8:129169486-129170026	chr8	129169486	129170026	20	rs7001706:129169758:G:C	1.214e-10
chr1:6969865-6970962	chr1	6969865	6970962	20	NA	NA
chr1:10078583-10079212	chr1	10078583	10079212	20	NA	NA
chr1:16950453-16951065	chr1	16950453	16951065	20	NA	NA
chr1:21960512-21961562	chr1	21960512	21961562	20	NA	NA
chr1:23778403-23778985	chr1	23778403	23778985	20	NA	NA
chr1:41512012-41512562	chr1	41512012	41512562	20	NA	NA
chr1:41966104-41966723	chr1	41966104	41966723	20	NA	NA
chr1:44533162-44533801	chr1	44533162	44533801	20	NA	NA
chr1:60893653-60894335	chr1	60893653	60894335	20	NA	NA
chr1:61608504-61609267	chr1	61608504	61609267	20	NA	NA
chr1:87258553-87259203	chr1	87258553	87259203	20	NA	NA
chr1:112597053-112597565	chr1	112597053	112597565	20	NA	NA
chr1:116551241-116551781	chr1	116551241	116551781	20	NA	NA
chr1:118113553-118114273	chr1	118113553	118114273	20	NA	NA
chr1:150943753-150944512	chr1	150943753	150944512	20	NA	NA
chr1:165857133-165857762	chr1	165857133	165857762	20	NA	NA
chr1:169498376-169499132	chr1	169498376	169499132	20	NA	NA
chr1:177409953-177410503	chr1	177409953	177410503	20	NA	NA
chr1:177445753-177446312	chr1	177445753	177446312	20	NA	NA
chr1:182992807-182993462	chr1	182992807	182993462	20	NA	NA
chr1:199985823-199986483	chr1	199985823	199986483	20	NA	NA
chr1:201278455-201279054	chr1	201278455	201279054	20	NA	NA
chr1:201985157-201985753	chr1	201985157	201985753	20	NA	NA
chr1:202003853-202004590	chr1	202003853	202004590	20	NA	NA
chr1:203285604-203286203	chr1	203285604	203286203	20	NA	NA
chr1:204542304-204543055	chr1	204542304	204543055	20	NA	NA
chr1:205286453-205287103	chr1	205286453	205287103	20	NA	NA
chr1:211715055-211715762	chr1	211715055	211715762	20	NA	NA
chr1:212320753-212321355	chr1	212320753	212321355	20	NA	NA
chr1:212731301-212731962	chr1	212731301	212731962	20	NA	NA
chr1:223894901-223895762	chr1	223894901	223895762	20	NA	NA
chr1:224447512-224448123	chr1	224447512	224448123	20	NA	NA
chr1:230895962-230896603	chr1	230895962	230896603	20	NA	NA
chr1:233243385-233243962	chr1	233243385	233243962	20	NA	NA
chr1:235804853-235805603	chr1	235804853	235805603	20	NA	NA
chr10:375507-376294	chr10	375507	376294	20	NA	NA
chr10:8170286-8170914	chr10	8170286	8170914	20	NA	NA
chr10:9078611-9079114	chr10	9078611	9079114	20	NA	NA
chr10:9230107-9230764	chr10	9230107	9230764	20	NA	NA
chr10:14613954-14614561	chr10	14613954	14614561	20	NA	NA
chr10:79731911-79732435	chr10	79731911	79732435	20	NA	NA
chr10:80502360-80502997	chr10	80502360	80502997	20	NA	NA
chr10:81098870-81099468	chr10	81098870	81099468	20	NA	NA
chr10:93120625-93121223	chr10	93120625	93121223	20	NA	NA
chr10:112190554-112191073	chr10	112190554	112191073	20	NA	NA
chr10:120760197-120760786	chr10	120760197	120760786	20	NA	NA
chr11:1515867-1516428	chr11	1515867	1516428	20	NA	NA
chr11:7618806-7619371	chr11	7618806	7619371	20	NA	NA
chr11:47210856-47211494	chr11	47210856	47211494	20	NA	NA
chr11:61300856-61301444	chr11	61300856	61301444	20	NA	NA
chr11:61394156-61394816	chr11	61394156	61394816	20	NA	NA
chr11:67913526-67914044	chr11	67913526	67914044	20	NA	NA
chr11:72938806-72939483	chr11	72938806	72939483	20	NA	NA
chr11:76746416-76746933	chr11	76746416	76746933	20	NA	NA
chr11:83121669-83122316	chr11	83121669	83122316	20	NA	NA
chr11:100503566-100504256	chr11	100503566	100504256	20	NA	NA
chr11:101206819-101207478	chr11	101206819	101207478	20	NA	NA
chr11:116941969-116942594	chr11	116941969	116942594	20	NA	NA
chr12:12670540-12671112	chr12	12670540	12671112	20	NA	NA
chr12:31612807-31613410	chr12	31612807	31613410	20	NA	NA
chr12:46849656-46850525	chr12	46849656	46850525	20	NA	NA
chr12:53288951-53289506	chr12	53288951	53289506	20	NA	NA
chr12:64474306-64475407	chr12	64474306	64475407	20	NA	NA
chr12:87833875-87834510	chr12	87833875	87834510	20	NA	NA
chr12:106135375-106136007	chr12	106135375	106136007	20	NA	NA
chr12:116732090-116732910	chr12	116732090	116732910	20	NA	NA
chr13:41469747-41470354	chr13	41469747	41470354	20	NA	NA
chr13:52248364-52248947	chr13	52248364	52248947	20	NA	NA
chr13:73639906-73640547	chr13	73639906	73640547	20	NA	NA
chr13:98953218-98953964	chr13	98953218	98953964	20	NA	NA
chr13:99136878-99137568	chr13	99136878	99137568	20	NA	NA
chr13:99710718-99711318	chr13	99710718	99711318	20	NA	NA
chr13:110161854-110162591	chr13	110161854	110162591	20	NA	NA
chr13:113667554-113668140	chr13	113667554	113668140	20	NA	NA
chr14:26750788-26751475	chr14	26750788	26751475	20	NA	NA
chr14:34250501-34251138	chr14	34250501	34251138	20	NA	NA
chr14:38119581-38120278	chr14	38119581	38120278	20	NA	NA
chr14:50334757-50335438	chr14	50334757	50335438	20	NA	NA
chr14:61993203-61993953	chr14	61993203	61993953	20	NA	NA
chr14:64701603-64702157	chr14	64701603	64702157	20	NA	NA
chr14:65427557-65428157	chr14	65427557	65428157	20	NA	NA
chr14:69681081-69681599	chr14	69681081	69681599	20	NA	NA
chr14:75725251-75726178	chr14	75725251	75726178	20	NA	NA
chr14:86053549-86054153	chr14	86053549	86054153	20	NA	NA
chr14:95064890-95065981	chr14	95064890	95065981	20	NA	NA
chr14:95806141-95807081	chr14	95806141	95807081	20	NA	NA
chr14:100021201-100021825	chr14	100021201	100021825	20	NA	NA
chr14:101874655-101875298	chr14	101874655	101875298	20	NA	NA
chr15:26083730-26084418	chr15	26083730	26084418	20	NA	NA
chr15:26105337-26105930	chr15	26105337	26105930	20	NA	NA
chr15:38885521-38886151	chr15	38885521	38886151	20	NA	NA
chr15:57620271-57620851	chr15	57620271	57620851	20	NA	NA
chr15:60685118-60685701	chr15	60685118	60685701	20	NA	NA
chr15:69884168-69884753	chr15	69884168	69884753	20	NA	NA
chr15:70280097-70280750	chr15	70280097	70280750	20	NA	NA
chr15:70385707-70386351	chr15	70385707	70386351	20	NA	NA
chr15:70600451-70601036	chr15	70600451	70601036	20	NA	NA
chr15:71376107-71376721	chr15	71376107	71376721	20	NA	NA
chr15:84599451-84600007	chr15	84599451	84600007	20	NA	NA
chr15:89663082-89663921	chr15	89663082	89663921	20	NA	NA
chr16:23159801-23160295	chr16	23159801	23160295	20	NA	NA
chr16:53452972-53453601	chr16	53452972	53453601	20	NA	NA
chr16:54574703-54575359	chr16	54574703	54575359	20	NA	NA
chr16:57298995-57299622	chr16	57298995	57299622	20	NA	NA
chr16:66550451-66551256	chr16	66550451	66551256	20	NA	NA
chr16:68321598-68322253	chr16	68321598	68322253	20	NA	NA
chr16:79205599-79206203	chr16	79205599	79206203	20	NA	NA
chr16:80710353-80711049	chr16	80710353	80711049	20	NA	NA
chr16:85492453-85493059	chr16	85492453	85493059	20	NA	NA
chr16:85505401-85506003	chr16	85505401	85506003	20	NA	NA
chr16:88050455-88051053	chr16	88050455	88051053	20	NA	NA
chr17:3731604-3732291	chr17	3731604	3732291	20	NA	NA
chr17:29821970-29822733	chr17	29821970	29822733	20	NA	NA
chr17:38179506-38180136	chr17	38179506	38180136	20	NA	NA
chr17:39677960-39679288	chr17	39677960	39679288	20	NA	NA
chr17:41916932-41917520	chr17	41916932	41917520	20	NA	NA
chr17:48545549-48546213	chr17	48545549	48546213	20	NA	NA
chr17:55174020-55174620	chr17	55174020	55174620	20	NA	NA
chr17:72964420-72965010	chr17	72964420	72965010	20	NA	NA
chr17:74169969-74170582	chr17	74169969	74170582	20	NA	NA
chr17:77967138-77967758	chr17	77967138	77967758	20	NA	NA
chr17:80091864-80092488	chr17	80091864	80092488	20	NA	NA
chr18:29952448-29953055	chr18	29952448	29953055	20	NA	NA
chr19:1262087-1262787	chr19	1262087	1262787	20	NA	NA
chr19:2631371-2631984	chr19	2631371	2631984	20	NA	NA
chr19:3374623-3375198	chr19	3374623	3375198	20	NA	NA
chr19:3403787-3404593	chr19	3403787	3404593	20	NA	NA
chr19:3710280-3710848	chr19	3710280	3710848	20	NA	NA
chr19:13273381-13274017	chr19	13273381	13274017	20	NA	NA
chr19:15673687-15674392	chr19	15673687	15674392	20	NA	NA
chr19:17249884-17250498	chr19	17249884	17250498	20	NA	NA
chr19:17350734-17351330	chr19	17350734	17351330	20	NA	NA
chr19:24006748-24007298	chr19	24006748	24007298	20	NA	NA
chr19:30167398-30168030	chr19	30167398	30168030	20	NA	NA
chr19:38791184-38791837	chr19	38791184	38791837	20	NA	NA
chr19:39328287-39328942	chr19	39328287	39328942	20	NA	NA
chr19:47599387-47599987	chr19	47599387	47599987	20	NA	NA
chr19:48103480-48104187	chr19	48103480	48104187	20	NA	NA
chr19:49072839-49073530	chr19	49072839	49073530	20	NA	NA
chr19:49322680-49323287	chr19	49322680	49323287	20	NA	NA
chr19:58310081-58310994	chr19	58310081	58310994	20	NA	NA
chr2:7889005-7889597	chr2	7889005	7889597	20	NA	NA
chr2:14683391-14683944	chr2	14683391	14683944	20	NA	NA
chr2:55172583-55173348	chr2	55172583	55173348	20	NA	NA
chr2:61934997-61935632	chr2	61934997	61935632	20	NA	NA
chr2:110448282-110449005	chr2	110448282	110449005	20	NA	NA
chr2:134262305-134263051	chr2	134262305	134263051	20	NA	NA
chr2:138433355-138433984	chr2	138433355	138433984	20	NA	NA
chr2:151022726-151023355	chr2	151022726	151023355	20	NA	NA
chr2:152475933-152476503	chr2	152475933	152476503	20	NA	NA
chr2:156046776-156047410	chr2	156046776	156047410	20	NA	NA
chr2:157981631-157982251	chr2	157981631	157982251	20	NA	NA
chr2:161490839-161491436	chr2	161490839	161491436	20	NA	NA
chr2:204974255-204974897	chr2	204974255	204974897	20	NA	NA
chr2:212299826-212300397	chr2	212299826	212300397	20	NA	NA
chr2:218196205-218196906	chr2	218196205	218196906	20	NA	NA
chr2:226705855-226706547	chr2	226705855	226706547	20	NA	NA
chr2:234180355-234181047	chr2	234180355	234181047	20	NA	NA
chr2:238847655-238848283	chr2	238847655	238848283	20	NA	NA
chr20:2748842-2749464	chr20	2748842	2749464	20	NA	NA
chr20:3783443-3784005	chr20	3783443	3784005	20	NA	NA
chr20:19028264-19028955	chr20	19028264	19028955	20	NA	NA
chr20:23338442-23339167	chr20	23338442	23339167	20	NA	NA
chr20:25020314-25020967	chr20	25020314	25020967	20	NA	NA
chr20:25477648-25478290	chr20	25477648	25478290	20	NA	NA
chr20:30467414-30468143	chr20	30467414	30468143	20	NA	NA
chr20:36618924-36619455	chr20	36618924	36619455	20	NA	NA
chr20:36773246-36773946	chr20	36773246	36773946	20	NA	NA
chr20:49050962-49051640	chr20	49050962	49051640	20	NA	NA
chr20:49440642-49441292	chr20	49440642	49441292	20	NA	NA
chr20:52701443-52702017	chr20	52701443	52702017	20	NA	NA
chr21:36062637-36063272	chr21	36062637	36063272	20	NA	NA
chr21:36217998-36218577	chr21	36217998	36218577	20	NA	NA
chr21:37774322-37774974	chr21	37774322	37774974	20	NA	NA
chr21:42955136-42955672	chr21	42955136	42955672	20	NA	NA
chr22:26326586-26327233	chr22	26326586	26327233	20	NA	NA
chr22:30608486-30609103	chr22	30608486	30609103	20	NA	NA
chr22:39686603-39687240	chr22	39686603	39687240	20	NA	NA
chr3:42603930-42604536	chr3	42603930	42604536	20	NA	NA
chr3:66479174-66479899	chr3	66479174	66479899	20	NA	NA
chr3:71257707-71258298	chr3	71257707	71258298	20	NA	NA
chr3:85829313-85829966	chr3	85829313	85829966	20	NA	NA
chr3:129231423-129232023	chr3	129231423	129232023	20	NA	NA
chr3:145833266-145833874	chr3	145833266	145833874	20	NA	NA
chr3:187526613-187527399	chr3	187526613	187527399	20	NA	NA
chr3:193429815-193430423	chr3	193429815	193430423	20	NA	NA
chr3:193859083-193859965	chr3	193859083	193859965	20	NA	NA
chr4:6689712-6690262	chr4	6689712	6690262	20	NA	NA
chr4:8424036-8424611	chr4	8424036	8424611	20	NA	NA
chr4:16142386-16143011	chr4	16142386	16143011	20	NA	NA
chr4:40550186-40550884	chr4	40550186	40550884	20	NA	NA
chr4:52924384-52925005	chr4	52924384	52925005	20	NA	NA
chr4:78485305-78485883	chr4	78485305	78485883	20	NA	NA
chr4:88041912-88042584	chr4	88041912	88042584	20	NA	NA
chr4:89332593-89333155	chr4	89332593	89333155	20	NA	NA
chr4:108974486-108975112	chr4	108974486	108975112	20	NA	NA
chr4:141612386-141612986	chr4	141612386	141612986	20	NA	NA
chr4:141649152-141649655	chr4	141649152	141649655	20	NA	NA
chr4:158236158-158237062	chr4	158236158	158237062	20	NA	NA
chr4:170226561-170227212	chr4	170226561	170227212	20	NA	NA
chr5:18048474-18049088	chr5	18048474	18049088	20	NA	NA
chr5:32249622-32250174	chr5	32249622	32250174	20	NA	NA
chr5:42854824-42855479	chr5	42854824	42855479	20	NA	NA
chr5:44568576-44569107	chr5	44568576	44569107	20	NA	NA
chr5:55354008-55354607	chr5	55354008	55354607	20	NA	NA
chr5:71010674-71011257	chr5	71010674	71011257	20	NA	NA
chr5:76463850-76464429	chr5	76463850	76464429	20	NA	NA
chr5:133372808-133373407	chr5	133372808	133373407	20	NA	NA
chr5:133772479-133773108	chr5	133772479	133773108	20	NA	NA
chr5:133781742-133782324	chr5	133781742	133782324	20	NA	NA
chr5:134382358-134383674	chr5	134382358	134383674	20	NA	NA
chr5:139035208-139035833	chr5	139035208	139035833	20	NA	NA
chr5:139037779-139038346	chr5	139037779	139038346	20	NA	NA
chr5:147525442-147526079	chr5	147525442	147526079	20	NA	NA
chr5:154224280-154224907	chr5	154224280	154224907	20	NA	NA
chr5:172880159-172880729	chr5	172880159	172880729	20	NA	NA
chr5:173089559-173090564	chr5	173089559	173090564	20	NA	NA
chr5:177505159-177505808	chr5	177505159	177505808	20	NA	NA
chr6:15251568-15252228	chr6	15251568	15252228	20	NA	NA
chr6:35699416-35700124	chr6	35699416	35700124	20	NA	NA
chr6:37483659-37484236	chr6	37483659	37484236	20	NA	NA
chr6:42096811-42097363	chr6	42096811	42097363	20	NA	NA
chr6:46766468-46767119	chr6	46766468	46767119	20	NA	NA
chr6:106076319-106076934	chr6	106076319	106076934	20	NA	NA
chr6:108910328-108910977	chr6	108910328	108910977	20	NA	NA
chr6:112339977-112340678	chr6	112339977	112340678	20	NA	NA
chr6:122138306-122138869	chr6	122138306	122138869	20	NA	NA
chr6:151377727-151378420	chr6	151377727	151378420	20	NA	NA
chr6:158481269-158482501	chr6	158481269	158482501	20	NA	NA
chr6:168265209-168265763	chr6	168265209	168265763	20	NA	NA
chr7:921935-922490	chr7	921935	922490	20	NA	NA
chr7:45453683-45454291	chr7	45453683	45454291	20	NA	NA
chr7:47514792-47515740	chr7	47514792	47515740	20	NA	NA
chr7:66935286-66935887	chr7	66935286	66935887	20	NA	NA
chr7:80797337-80797974	chr7	80797337	80797974	20	NA	NA
chr7:116764524-116765142	chr7	116764524	116765142	20	NA	NA
chr7:129041086-129041785	chr7	129041086	129041785	20	NA	NA
chr7:139748935-139749493	chr7	139748935	139749493	20	NA	NA
chr7:158611037-158611787	chr7	158611037	158611787	20	NA	NA
chr8:11647084-11647736	chr8	11647084	11647736	20	NA	NA
chr8:22001111-22001694	chr8	22001111	22001694	20	NA	NA
chr8:22601150-22601815	chr8	22601150	22601815	20	NA	NA
chr8:36968083-36969033	chr8	36968083	36969033	20	NA	NA
chr8:41427011-41427636	chr8	41427011	41427636	20	NA	NA
chr8:49308584-49309186	chr8	49308584	49309186	20	NA	NA
chr8:63435700-63436279	chr8	63435700	63436279	20	NA	NA
chr8:69937915-69938618	chr8	69937915	69938618	20	NA	NA
chr8:75547634-75548234	chr8	75547634	75548234	20	NA	NA
chr8:80812736-80813465	chr8	80812736	80813465	20	NA	NA
chr8:94080500-94081050	chr8	94080500	94081050	20	NA	NA
chr8:103659733-103660328	chr8	103659733	103660328	20	NA	NA
chr8:103818583-103819676	chr8	103818583	103819676	20	NA	NA
chr8:112126283-112126883	chr8	112126283	112126883	20	NA	NA
chr8:123930976-123931586	chr8	123930976	123931586	20	NA	NA
chr8:135723571-135724146	chr8	135723571	135724146	20	NA	NA
chr8:140770514-140771168	chr8	140770514	140771168	20	NA	NA
chr9:33106776-33107497	chr9	33106776	33107497	20	NA	NA
chr9:38495126-38495791	chr9	38495126	38495791	20	NA	NA
chr9:73095497-73096102	chr9	73095497	73096102	20	NA	NA
chr9:85656623-85657150	chr9	85656623	85657150	20	NA	NA
chr9:91636043-91636602	chr9	91636043	91636602	20	NA	NA
chr9:111241033-111241750	chr9	111241033	111241750	20	NA	NA
chr9:112852000-112852747	chr9	112852000	112852747	20	NA	NA
chr9:130336752-130337347	chr9	130336752	130337347	20	NA	NA
chr9:130817833-130818423	chr9	130817833	130818423	20	NA	NA
chr9:134469543-134470152	chr9	134469543	134470152	20	NA	NA
chr9:137261597-137262496	chr9	137261597	137262496	20	NA	NA
chr9:137852324-137852943	chr9	137852324	137852943	20	NA	NA
chr9:139589800-139590383	chr9	139589800	139590383	20	NA	NA
chr9:140092380-140092943	chr9	140092380	140092943	20	NA	NA
chr9:140163527-140164197	chr9	140163527	140164197	20	NA	NA
chr9:140330447-140331033	chr9	140330447	140331033	20	NA	NA
chrX:53318309-53318928	chrX	53318309	53318928	20	NA	NA
chrX:66915549-66916438	chrX	66915549	66916438	20	NA	NA
chrX:137093559-137094149	chrX	137093559	137094149	20	NA	NA
chrX:139541649-139542855	chrX	139541649	139542855	20	NA	NA
chr16:52598903-52599553	chr16	52598903	52599553	19	rs3104744:52599394:C:T	7.513e-16
chr1:1268055-1268653	chr1	1268055	1268653	19	NA	NA
chr1:2369251-2369883	chr1	2369251	2369883	19	NA	NA
chr1:7019431-7020053	chr1	7019431	7020053	19	NA	NA
chr1:10811151-10811665	chr1	10811151	10811665	19	NA	NA
chr1:12535953-12536556	chr1	12535953	12536556	19	NA	NA
chr1:19752253-19752712	chr1	19752253	19752712	19	NA	NA
chr1:21573553-21574153	chr1	21573553	21574153	19	NA	NA
chr1:24283553-24284017	chr1	24283553	24284017	19	NA	NA
chr1:24345053-24345705	chr1	24345053	24345705	19	NA	NA
chr1:26440853-26441517	chr1	26440853	26441517	19	NA	NA
chr1:31296681-31297726	chr1	31296681	31297726	19	NA	NA
chr1:35971554-35972155	chr1	35971554	35972155	19	NA	NA
chr1:41269601-41270162	chr1	41269601	41270162	19	NA	NA
chr1:45285062-45285953	chr1	45285062	45285953	19	NA	NA
chr1:47223004-47223832	chr1	47223004	47223832	19	NA	NA
chr1:55773101-55773667	chr1	55773101	55773667	19	NA	NA
chr1:86016603-86017355	chr1	86016603	86017355	19	NA	NA
chr1:96155253-96155853	chr1	96155253	96155853	19	NA	NA
chr1:109741717-109742281	chr1	109741717	109742281	19	NA	NA
chr1:112521255-112521862	chr1	112521255	112521862	19	NA	NA
chr1:116495153-116495705	chr1	116495153	116495705	19	NA	NA
chr1:118105203-118106032	chr1	118105203	118106032	19	NA	NA
chr1:147084153-147084703	chr1	147084153	147084703	19	NA	NA
chr1:155011103-155011762	chr1	155011103	155011762	19	NA	NA
chr1:156474755-156475451	chr1	156474755	156475451	19	NA	NA
chr1:156609351-156610005	chr1	156609351	156610005	19	NA	NA
chr1:162762051-162762762	chr1	162762051	162762762	19	NA	NA
chr1:177554573-177555203	chr1	177554573	177555203	19	NA	NA
chr1:180197582-180198162	chr1	180197582	180198162	19	NA	NA
chr1:181088301-181088962	chr1	181088301	181088962	19	NA	NA
chr1:182332803-182333355	chr1	182332803	182333355	19	NA	NA
chr1:184559453-184560005	chr1	184559453	184560005	19	NA	NA
chr1:202027262-202028070	chr1	202027262	202028070	19	NA	NA
chr1:202056053-202056604	chr1	202056053	202056604	19	NA	NA
chr1:204114373-204114935	chr1	204114373	204114935	19	NA	NA
chr1:205532854-205533581	chr1	205532854	205533581	19	NA	NA
chr1:208063705-208064254	chr1	208063705	208064254	19	NA	NA
chr1:209699454-209700073	chr1	209699454	209700073	19	NA	NA
chr1:218819454-218820155	chr1	218819454	218820155	19	NA	NA
chr1:223908504-223909173	chr1	223908504	223909173	19	NA	NA
chr1:224330462-224331083	chr1	224330462	224331083	19	NA	NA
chr1:234803751-234804405	chr1	234803751	234804405	19	NA	NA
chr1:235029901-235030503	chr1	235029901	235030503	19	NA	NA
chr1:235092905-235093633	chr1	235092905	235093633	19	NA	NA
chr1:235142305-235142953	chr1	235142305	235142953	19	NA	NA
chr1:244185854-244186612	chr1	244185854	244186612	19	NA	NA
chr1:244211294-244212003	chr1	244211294	244212003	19	NA	NA
chr10:1676349-1676970	chr10	1676349	1676970	19	NA	NA
chr10:6376654-6377268	chr10	6376654	6377268	19	NA	NA
chr10:6443404-6444014	chr10	6443404	6444014	19	NA	NA
chr10:7275363-7276114	chr10	7275363	7276114	19	NA	NA
chr10:22921894-22922514	chr10	22921894	22922514	19	NA	NA
chr10:43577504-43578064	chr10	43577504	43578064	19	NA	NA
chr10:63031160-63031761	chr10	63031160	63031761	19	NA	NA
chr10:73093956-73094607	chr10	73093956	73094607	19	NA	NA
chr10:76503054-76503647	chr10	76503054	76503647	19	NA	NA
chr10:77022397-77022947	chr10	77022397	77022947	19	NA	NA
chr10:79257904-79258961	chr10	79257904	79258961	19	NA	NA
chr10:79266960-79267573	chr10	79266960	79267573	19	NA	NA
chr10:80906356-80907014	chr10	80906356	80907014	19	NA	NA
chr10:103124425-103124918	chr10	103124425	103124918	19	NA	NA
chr10:105308554-105309257	chr10	105308554	105309257	19	NA	NA
chr10:105649776-105650464	chr10	105649776	105650464	19	NA	NA
chr10:112549510-112550114	chr10	112549510	112550114	19	NA	NA
chr10:117902768-117903368	chr10	117902768	117903368	19	NA	NA
chr10:134079064-134079664	chr10	134079064	134079664	19	NA	NA
chr11:469781-470533	chr11	469781	470533	19	NA	NA
chr11:3021616-3022232	chr11	3021616	3022232	19	NA	NA
chr11:3051582-3052119	chr11	3051582	3052119	19	NA	NA
chr11:3434983-3435579	chr11	3434983	3435579	19	NA	NA
chr11:9105494-9106044	chr11	9105494	9106044	19	NA	NA
chr11:10764269-10764845	chr11	10764269	10764845	19	NA	NA
chr11:13356869-13357381	chr11	13356869	13357381	19	NA	NA
chr11:20016519-20017133	chr11	20016519	20017133	19	NA	NA
chr11:20057267-20058428	chr11	20057267	20058428	19	NA	NA
chr11:35929519-35930116	chr11	35929519	35930116	19	NA	NA
chr11:45007266-45007883	chr11	45007266	45007883	19	NA	NA
chr11:60138166-60138881	chr11	60138166	60138881	19	NA	NA
chr11:65244683-65245482	chr11	65244683	65245482	19	NA	NA
chr11:66822556-66823083	chr11	66822556	66823083	19	NA	NA
chr11:66829645-66830382	chr11	66829645	66830382	19	NA	NA
chr11:67983731-67984445	chr11	67983731	67984445	19	NA	NA
chr11:68147666-68148256	chr11	68147666	68148256	19	NA	NA
chr11:70615279-70615844	chr11	70615279	70615844	19	NA	NA
chr11:82715078-82715644	chr11	82715078	82715644	19	NA	NA
chr11:100870395-100871029	chr11	100870395	100871029	19	NA	NA
chr11:115342028-115342656	chr11	115342028	115342656	19	NA	NA
chr11:121196769-121197383	chr11	121196769	121197383	19	NA	NA
chr12:6198039-6198792	chr12	6198039	6198792	19	NA	NA
chr12:9800960-9801595	chr12	9800960	9801595	19	NA	NA
chr12:15341010-15341556	chr12	15341010	15341556	19	NA	NA
chr12:42628625-42629356	chr12	42628625	42629356	19	NA	NA
chr12:53365608-53366217	chr12	53365608	53366217	19	NA	NA
chr12:53568639-53569375	chr12	53568639	53569375	19	NA	NA
chr12:73777489-73778075	chr12	73777489	73778075	19	NA	NA
chr12:113679512-113680390	chr12	113679512	113680390	19	NA	NA
chr12:122192706-122193245	chr12	122192706	122193245	19	NA	NA
chr12:122952406-122953062	chr12	122952406	122953062	19	NA	NA
chr12:124852242-124852771	chr12	124852242	124852771	19	NA	NA
chr12:125004689-125005292	chr12	125004689	125005292	19	NA	NA
chr12:125412610-125413392	chr12	125412610	125413392	19	NA	NA
chr13:31648368-31648964	chr13	31648368	31648964	19	NA	NA
chr13:34909647-34910214	chr13	34909647	34910214	19	NA	NA
chr13:45428540-45429247	chr13	45428540	45429247	19	NA	NA
chr13:111462145-111462779	chr13	111462145	111462779	19	NA	NA
chr14:26193475-26194057	chr14	26193475	26194057	19	NA	NA
chr14:68925651-68926249	chr14	68925651	68926249	19	NA	NA
chr14:74219305-74219861	chr14	74219305	74219861	19	NA	NA
chr14:74230131-74230605	chr14	74230131	74230605	19	NA	NA
chr14:90978574-90979175	chr14	90978574	90979175	19	NA	NA
chr14:94862224-94862801	chr14	94862224	94862801	19	NA	NA
chr14:95775605-95776223	chr14	95775605	95776223	19	NA	NA
chr14:105794873-105795594	chr14	105794873	105795594	19	NA	NA
chr14:106109601-106110201	chr14	106109601	106110201	19	NA	NA
chr15:40361307-40361900	chr15	40361307	40361900	19	NA	NA
chr15:52948530-52949060	chr15	52948530	52949060	19	NA	NA
chr15:53730107-53730668	chr15	53730107	53730668	19	NA	NA
chr15:58624230-58624836	chr15	58624230	58624836	19	NA	NA
chr15:62747509-62748082	chr15	62747509	62748082	19	NA	NA
chr15:63969901-63970535	chr15	63969901	63970535	19	NA	NA
chr15:79223232-79224107	chr15	79223232	79224107	19	NA	NA
chr15:90300051-90300659	chr15	90300051	90300659	19	NA	NA
chr15:101057050-101057807	chr15	101057050	101057807	19	NA	NA
chr16:1209894-1210666	chr16	1209894	1210666	19	NA	NA
chr16:1695951-1696595	chr16	1695951	1696595	19	NA	NA
chr16:2276351-2277099	chr16	2276351	2277099	19	NA	NA
chr16:4666187-4666938	chr16	4666187	4666938	19	NA	NA
chr16:10721798-10722421	chr16	10721798	10722421	19	NA	NA
chr16:14750237-14750795	chr16	14750237	14750795	19	NA	NA
chr16:27254351-27254905	chr16	27254351	27254905	19	NA	NA
chr16:29606487-29607171	chr16	29606487	29607171	19	NA	NA
chr16:46945538-46946103	chr16	46945538	46946103	19	NA	NA
chr16:68268038-68268686	chr16	68268038	68268686	19	NA	NA
chr16:68460038-68460603	chr16	68460038	68460603	19	NA	NA
chr16:69757603-69758103	chr16	69757603	69758103	19	NA	NA
chr16:84483345-84484001	chr16	84483345	84484001	19	NA	NA
chr16:85648601-85649272	chr16	85648601	85649272	19	NA	NA
chr16:85753745-85754321	chr16	85753745	85754321	19	NA	NA
chr16:88595872-88596544	chr16	88595872	88596544	19	NA	NA
chr17:17714910-17715528	chr17	17714910	17715528	19	NA	NA
chr17:25907395-25907970	chr17	25907395	25907970	19	NA	NA
chr17:38255303-38255864	chr17	38255303	38255864	19	NA	NA
chr17:38697013-38697732	chr17	38697013	38697732	19	NA	NA
chr17:39957606-39958170	chr17	39957606	39958170	19	NA	NA
chr17:40956908-40957528	chr17	40956908	40957528	19	NA	NA
chr17:41116213-41116853	chr17	41116213	41116853	19	NA	NA
chr17:43225386-43226245	chr17	43225386	43226245	19	NA	NA
chr17:44013178-44013744	chr17	44013178	44013744	19	NA	NA
chr17:54251170-54251778	chr17	54251170	54251778	19	NA	NA
chr17:55363913-55364520	chr17	55363913	55364520	19	NA	NA
chr17:55884570-55885170	chr17	55884570	55885170	19	NA	NA
chr17:57863767-57864345	chr17	57863767	57864345	19	NA	NA
chr17:66374470-66375438	chr17	66374470	66375438	19	NA	NA
chr17:66435953-66436545	chr17	66435953	66436545	19	NA	NA
chr17:72978003-72978717	chr17	72978003	72978717	19	NA	NA
chr17:73545351-73546108	chr17	73545351	73546108	19	NA	NA
chr17:78368406-78368970	chr17	78368406	78368970	19	NA	NA
chr17:80850713-80851295	chr17	80850713	80851295	19	NA	NA
chr18:26582805-26583498	chr18	26582805	26583498	19	NA	NA
chr18:42351802-42352459	chr18	42351802	42352459	19	NA	NA
chr18:45979722-45981011	chr18	45979722	45981011	19	NA	NA
chr18:46510268-46510861	chr18	46510268	46510861	19	NA	NA
chr19:534994-535643	chr19	534994	535643	19	NA	NA
chr19:1183717-1184334	chr19	1183717	1184334	19	NA	NA
chr19:2484081-2484730	chr19	2484081	2484730	19	NA	NA
chr19:4388584-4389180	chr19	4388584	4389180	19	NA	NA
chr19:4706721-4707380	chr19	4706721	4707380	19	NA	NA
chr19:12897180-12897798	chr19	12897180	12897798	19	NA	NA
chr19:14192080-14192848	chr19	14192080	14192848	19	NA	NA
chr19:34801384-34801948	chr19	34801384	34801948	19	NA	NA
chr19:37178180-37178744	chr19	37178180	37178744	19	NA	NA
chr19:39226780-39227487	chr19	39226780	39227487	19	NA	NA
chr19:42772248-42773480	chr19	42772248	42773480	19	NA	NA
chr19:46246130-46246887	chr19	46246130	46246887	19	NA	NA
chr19:47880584-47881730	chr19	47880584	47881730	19	NA	NA
chr19:48246303-48247093	chr19	48246303	48247093	19	NA	NA
chr2:11646083-11646701	chr2	11646083	11646701	19	NA	NA
chr2:25301444-25302286	chr2	25301444	25302286	19	NA	NA
chr2:65536683-65537305	chr2	65536683	65537305	19	NA	NA
chr2:70171844-70172501	chr2	70171844	70172501	19	NA	NA
chr2:73210738-73211486	chr2	73210738	73211486	19	NA	NA
chr2:97630197-97630851	chr2	97630197	97630851	19	NA	NA
chr2:100630276-100630747	chr2	100630276	100630747	19	NA	NA
chr2:101726876-101727384	chr2	101726876	101727384	19	NA	NA
chr2:108912001-108912691	chr2	108912001	108912691	19	NA	NA
chr2:133339683-133340501	chr2	133339683	133340501	19	NA	NA
chr2:143511597-143512236	chr2	143511597	143512236	19	NA	NA
chr2:150845976-150846586	chr2	150845976	150846586	19	NA	NA
chr2:165379076-165379598	chr2	165379076	165379598	19	NA	NA
chr2:175063305-175063953	chr2	175063305	175063953	19	NA	NA
chr2:186051983-186052605	chr2	186051983	186052605	19	NA	NA
chr2:201165136-201165841	chr2	201165136	201165841	19	NA	NA
chr2:216844333-216844844	chr2	216844333	216844844	19	NA	NA
chr2:223890747-223891486	chr2	223890747	223891486	19	NA	NA
chr2:227046276-227046853	chr2	227046276	227046853	19	NA	NA
chr2:232087633-232088353	chr2	232087633	232088353	19	NA	NA
chr2:238849248-238850001	chr2	238849248	238850001	19	NA	NA
chr20:809542-810145	chr20	809542	810145	19	NA	NA
chr20:2188205-2188817	chr20	2188205	2188817	19	NA	NA
chr20:2679692-2680248	chr20	2679692	2680248	19	NA	NA
chr20:23318345-23319062	chr20	23318345	23319062	19	NA	NA
chr20:25235901-25236498	chr20	25235901	25236498	19	NA	NA
chr20:34737343-34737914	chr20	34737343	34737914	19	NA	NA
chr20:43375764-43376364	chr20	43375764	43376364	19	NA	NA
chr20:49182814-49183367	chr20	49182814	49183367	19	NA	NA
chr20:49189898-49190517	chr20	49189898	49190517	19	NA	NA
chr20:55310174-55310778	chr20	55310174	55310778	19	NA	NA
chr20:57133262-57133892	chr20	57133262	57133892	19	NA	NA
chr21:16816543-16817324	chr21	16816543	16817324	19	NA	NA
chr21:37985272-37985847	chr21	37985272	37985847	19	NA	NA
chr21:38361874-38362536	chr21	38361874	38362536	19	NA	NA
chr22:19160512-19161080	chr22	19160512	19161080	19	NA	NA
chr22:19542330-19542886	chr22	19542330	19542886	19	NA	NA
chr22:21239918-21240530	chr22	21239918	21240530	19	NA	NA
chr22:24591568-24592230	chr22	24591568	24592230	19	NA	NA
chr22:25529930-25530636	chr22	25529930	25530636	19	NA	NA
chr22:37908053-37908933	chr22	37908053	37908933	19	NA	NA
chr22:38173086-38173659	chr22	38173086	38173659	19	NA	NA
chr22:42569463-42570156	chr22	42569463	42570156	19	NA	NA
chr22:44315026-44315763	chr22	44315026	44315763	19	NA	NA
chr22:44851203-44851833	chr22	44851203	44851833	19	NA	NA
chr22:50342618-50343336	chr22	50342618	50343336	19	NA	NA
chr22:50364286-50364910	chr22	50364286	50364910	19	NA	NA
chr3:4824289-4824886	chr3	4824289	4824886	19	NA	NA
chr3:14290373-14291023	chr3	14290373	14291023	19	NA	NA
chr3:26777649-26778296	chr3	26777649	26778296	19	NA	NA
chr3:37823822-37824465	chr3	37823822	37824465	19	NA	NA
chr3:38045765-38046423	chr3	38045765	38046423	19	NA	NA
chr3:42171849-42172423	chr3	42171849	42172423	19	NA	NA
chr3:45579824-45580565	chr3	45579824	45580565	19	NA	NA
chr3:45588573-45589265	chr3	45588573	45589265	19	NA	NA
chr3:47528602-47529215	chr3	47528602	47529215	19	NA	NA
chr3:50306099-50306765	chr3	50306099	50306765	19	NA	NA
chr3:58456978-58457623	chr3	58456978	58457623	19	NA	NA
chr3:59527063-59527574	chr3	59527063	59527574	19	NA	NA
chr3:71394680-71395339	chr3	71394680	71395339	19	NA	NA
chr3:72319124-72319665	chr3	72319124	72319665	19	NA	NA
chr3:81858428-81859016	chr3	81858428	81859016	19	NA	NA
chr3:96850263-96850824	chr3	96850263	96850824	19	NA	NA
chr3:129204503-129205078	chr3	129204503	129205078	19	NA	NA
chr3:141086978-141087528	chr3	141086978	141087528	19	NA	NA
chr3:156800149-156800746	chr3	156800149	156800746	19	NA	NA
chr3:169341616-169342178	chr3	169341616	169342178	19	NA	NA
chr3:175403272-175404028	chr3	175403272	175404028	19	NA	NA
chr3:177077536-177078253	chr3	177077536	177078253	19	NA	NA
chr3:189047813-189048333	chr3	189047813	189048333	19	NA	NA
chr3:193988315-193989428	chr3	193988315	193989428	19	NA	NA
chr4:1556604-1557111	chr4	1556604	1557111	19	NA	NA
chr4:6994805-6995454	chr4	6994805	6995454	19	NA	NA
chr4:14878988-14879611	chr4	14878988	14879611	19	NA	NA
chr4:52710654-52711305	chr4	52710654	52711305	19	NA	NA
chr4:77447511-77448154	chr4	77447511	77448154	19	NA	NA
chr4:93404262-93405055	chr4	93404262	93405055	19	NA	NA
chr4:141226211-141226755	chr4	141226211	141226755	19	NA	NA
chr4:169737736-169738384	chr4	169737736	169738384	19	NA	NA
chr4:182878136-182878705	chr4	182878136	182878705	19	NA	NA
chr5:14008879-14009608	chr5	14008879	14009608	19	NA	NA
chr5:33614150-33614800	chr5	33614150	33614800	19	NA	NA
chr5:53951900-53952553	chr5	53951900	53952553	19	NA	NA
chr5:55646342-55647072	chr5	55646342	55647072	19	NA	NA
chr5:66037183-66038029	chr5	66037183	66038029	19	NA	NA
chr5:66915403-66915983	chr5	66915403	66915983	19	NA	NA
chr5:67731107-67731688	chr5	67731107	67731688	19	NA	NA
[truncated: 89,714 more rows]
