# Supplementary material for: Estrogen receptor 1 chromatin profiling in human breast tumors reveals high inter-patient heterogeneity with enrichment of risk SNPs and enhancer activity at most-conserved regions
Source: HighWire-hosted journal article supplement (doi:10.1101/gr.278680.123), 2024-05-06
Supplement: Supplemental_Table_S4.xlsx [file Supplemental_Table_S4.xlsx]

## Sheet: Supplemental_Table_S4
Supplemental Table S4 | Summary of the clincopathological features of female and male patients
patient_sex	correlation_cluster	experiment_GEO_accession	Sample_GEO_ID	source_IDs	publication	outcome	ESR1	PGR	ERBB2	Tumor%
Female	1	GSE40867	GSM1003708	G1	Jansen MP, et al., Cancer Res 2013	poor	+	+	+	70
Female	5	GSE40867	GSM1003711	G2	Jansen MP, et al., Cancer Res 2013	poor	+	+	-	73
Female	5	GSE40867	GSM1003714	G3	Jansen MP, et al., Cancer Res 2013	poor	+	+	-	70
Female	4	GSE40867	GSM1003717	G4	Jansen MP, et al., Cancer Res 2013	poor	+	+	-	70
Female	5	GSE40867	GSM1003720	G5	Jansen MP, et al., Cancer Res 2013	poor	+	+	NA	70
Female	5	GSE40867	GSM1003723	P1	Jansen MP, et al., Cancer Res 2013	poor	+	+	-	80
Female	4	GSE40867	GSM1003726	P2	Jansen MP, et al., Cancer Res 2013	poor	+	+	-	50
Female	1	GSE40867	GSM1003728	P3	Jansen MP, et al., Cancer Res 2013	poor	+	+	-	85
Female	4	GSE40867	GSM1003734	P5	Jansen MP, et al., Cancer Res 2013	poor	+	+	NA	77
Female	1	GSE40867	GSM1003737	P6	Jansen MP, et al., Cancer Res 2013	poor	+	+	-	80
Female	1	GSE40867	GSM1003740	P7	Jansen MP, et al., Cancer Res 2013	poor	+	+	-	67
Female	2	GSE104399	GSM2797074	Female_1	Severson TM, et al. Nat Commun 2018	poor	+	+	+	NA
Female	2	GSE104399	GSM2797075	Female_2	Severson TM, et al. Nat Commun 2018	good	+	+	-	NA
Female	1	GSE104399	GSM2797076	Female_3	Severson TM, et al. Nat Commun 2018	good	+	+	-	NA
Female	1	GSE104399	GSM2797081	Female_4	Severson TM, et al. Nat Commun 2018	good	+	+	-	NA
Female	3	GSE104399	GSM2797082	Female_5	Severson TM, et al. Nat Commun 2018	good	+	+	-	NA
Female	5	GSE104399	GSM2797086	Female_6	Severson TM, et al. Nat Commun 2018	good	+	+	-	NA
Female	2	GSE244840 / EGAS50000000008	GSM7830649	ERa_BRCa_patient_1	Joosten SEP et al. [This work]	NA	+	-	-	NA
Female	2	GSE244840 / EGAS50000000008	GSM7830650	ERa_BRCa_patient_2	Joosten SEP et al. [This work]	NA	+	+	-	NA
Female	2	GSE244840 / EGAS50000000008	GSM7830651	ERa_BRCa_patient_3	Joosten SEP et al. [This work]	NA	+	+	-	80
Female	2	GSE244840 / EGAS50000000008	GSM7830652	ERa_BRCa_patient_4	Joosten SEP et al. [This work]	NA	+	+	-	80
Female	2	GSE244840 / EGAS50000000008	GSM7830653	ERa_BRCa_patient_5	Joosten SEP et al. [This work]	NA	+	+	-	80
Female	4	GSE32222	GSM798383	G1	Ross-Innes CS, et al. Nature 2012	good	+	+	-	70
Female	4	GSE32222	GSM798384	G2	Ross-Innes CS, et al. Nature 2012	good	+	+	-	70
Female	1	GSE32222	GSM798385	G3	Ross-Innes CS, et al. Nature 2012	good	+	+	-	NA
Female	5	GSE32222	GSM798386	G4	Ross-Innes CS, et al. Nature 2012	good	+	+	-	NA
Female	1	GSE32222	GSM798387	G5_1	Ross-Innes CS, et al. Nature 2012	good	+	+	-	90
Female	1	GSE32222	GSM798388	G5_2	Ross-Innes CS, et al. Nature 2012	good	+	+	-	90
Female	4	GSE32222	GSM798389	G6	Ross-Innes CS, et al. Nature 2012	good	+	+	-	100
Female	1	GSE32222	GSM798390	G7	Ross-Innes CS, et al. Nature 2012	good	+	+	-	70
Female	1	GSE32222	GSM798391	G8	Ross-Innes CS, et al. Nature 2012	good	+	+	-	70
Female	1	GSE32222	GSM798392	P1	Ross-Innes CS, et al. Nature 2012	poor	+	+	+	NA
Female	5	GSE32222	GSM798393	P2	Ross-Innes CS, et al. Nature 2012	poor	+	-	-	NA
Female	1	GSE32222	GSM798394	P3	Ross-Innes CS, et al. Nature 2012	poor	+	-	-	92
Female	4	GSE32222	GSM798395	P4	Ross-Innes CS, et al. Nature 2012	poor	+	-	-	91
Female	1	GSE32222	GSM798396	P5_1	Ross-Innes CS, et al. Nature 2012	poor	+	-	-	NA
Female	1	GSE32222	GSM798397	P5_2	Ross-Innes CS, et al. Nature 2012	poor	+	-	-	NA
Female	5	GSE32222	GSM798398	P6_1	Ross-Innes CS, et al. Nature 2012	poor	+	-	-	55
Female	5	GSE32222	GSM798399	P6_2	Ross-Innes CS, et al. Nature 2012	poor	+	-	-	55
Female	5	GSE32222	GSM798400	P7	Ross-Innes CS, et al. Nature 2012	poor	+	-	-	55
Male	5	GSE104399	GSM2797090	ER ChIP-seq Male_1	Severson TM, et al. Nat Commun 2018	poor	+	+	0
Male	4	GSE104399	GSM2797091	ER ChIP-seq Male_2	Severson TM, et al. Nat Commun 2018	poor	+	+	0
Male	5	GSE104399	GSM2797092	ER ChIP-seq Male_3	Severson TM, et al. Nat Commun 2018	good	+	-	0
Male	5	GSE104399	GSM2797093	ER ChIP-seq Male_4	Severson TM, et al. Nat Commun 2018	poor	+	+	0
Male	1	GSE104399	GSM2797094	ER ChIP-seq Male_5	Severson TM, et al. Nat Commun 2018	poor	+	-	0
Male	2	GSE104399	GSM2797095	ER ChIP-seq Male_6	Severson TM, et al. Nat Commun 2018	good	+	+	0
Male	1	GSE104399	GSM2797096	ER ChIP-seq Male_7	Severson TM, et al. Nat Commun 2018	NA	+	-	0
Male	2	GSE104399	GSM2797097	ER ChIP-seq Male_8	Severson TM, et al. Nat Commun 2018	good	+	+	0
Male	3	GSE104399	GSM2797098	ER ChIP-seq Male_9	Severson TM, et al. Nat Commun 2018	NA	+	+	0
Male	1	GSE104399	GSM2797099	ER ChIP-seq Male_10	Severson TM, et al. Nat Commun 2018	NA	+	+	0
Male	4	GSE104399	GSM2797100	ER ChIP-seq Male_11	Severson TM, et al. Nat Commun 2018	poor	+	+	0
Male	1	GSE104399	GSM2797101	ER ChIP-seq Male_12	Severson TM, et al. Nat Commun 2018	good	+	+	0
Male	2	GSE104399	GSM2797102	ER ChIP-seq Male_13	Severson TM, et al. Nat Commun 2018	poor	+	-	0
Male	5	GSE104399	GSM2797103	ER ChIP-seq Male_14	Severson TM, et al. Nat Commun 2018	good	+	+	0
Male	1	GSE104399	GSM2797104	ER ChIP-seq Male_15	Severson TM, et al. Nat Commun 2018	good	+	+	0
Male	1	GSE104399	GSM2797105	ER ChIP-seq Male_16	Severson TM, et al. Nat Commun 2018	good	+	+	0
Male	1	GSE104399	GSM2797106	ER ChIP-seq Male_17	Severson TM, et al. Nat Commun 2018	NA	+	-	0
Male	1	GSE104399	GSM2797107	ER ChIP-seq Male_18	Severson TM, et al. Nat Commun 2018	NA	+	+	0
Male	1	GSE104399	GSM2797108	ER ChIP-seq Male_19	Severson TM, et al. Nat Commun 2018	good	+	+	0
Male	3	GSE104399	GSM2797109	ER ChIP-seq Male_20	Severson TM, et al. Nat Commun 2018	good	+	+	0
Male	1	GSE104399	GSM2797110	ER ChIP-seq Male_21	Severson TM, et al. Nat Commun 2018	NA	+	-	0
Male	3	GSE104399	GSM2797111	ER ChIP-seq Male_22	Severson TM, et al. Nat Commun 2018	good	+	+	0
Male	3	GSE104399	GSM2797112	ER ChIP-seq Male_23	Severson TM, et al. Nat Commun 2018	NA	+	+	0
Male	3	GSE104399	GSM2797113	ER ChIP-seq Male_24	Severson TM, et al. Nat Commun 2018	NA	NA	NA	NA
Male	3	GSE104399	GSM2797114	ER ChIP-seq Male_25	Severson TM, et al. Nat Commun 2018	NA	+	+	0
Male	4	GSE104399	GSM2797115	ER ChIP-seq Male_26	Severson TM, et al. Nat Commun 2018	poor	+	+	0
Male	2	GSE104399	GSM2797116	ER ChIP-seq Male_27	Severson TM, et al. Nat Commun 2018	poor	+	+	0
Male	1	GSE104399	GSM2797117	ER ChIP-seq Male_28	Severson TM, et al. Nat Commun 2018	NA	NA	-	0
Male	2	GSE104399	GSM2797118	ER ChIP-seq Male_29	Severson TM, et al. Nat Commun 2018	NA	NA	NA	NA
Male	4	GSE104399	GSM2797119	ER ChIP-seq Male_30	Severson TM, et al. Nat Commun 2018	NA	NA	NA	NA
