# Supplementary material for: Estrogen receptor 1 chromatin profiling in human breast tumors reveals high inter-patient heterogeneity with enrichment of risk SNPs and enhancer activity at most-conserved regions
Source: HighWire-hosted journal article supplement (doi:10.1101/gr.278680.123), 2024-05-06
Supplement: Supplemental_Table_S5.xlsx [file Supplemental_Table_S5.xlsx]

## Sheet: Supplemental_Table_S5
Supplemental Table S5 | rSNPs that intersect with an ERE
SNP_name2	ERE_chr	ERE_start	ERE_end	ERE_strenght	Tally_chr	Tally_start	Tally_end	Tally_count	SNP_chr	SNP_start	SNP_pval	SNP_name1	SNP_ref	SNP_alt	SNP_Beta	SNP_Beta_cat	Comment	SNP2TFBS_PWM Score on Ref	SNP2TFBS_PWM score on Alt	Affinity	STARR_cat	Starr_condition	STARR_DMSO	Oligo_FW_WT	Oligo_FW_SNP	Oligo_RV_WT	Oligo_RV_SNP
12:14408698:C:T	chr12	14408685	14408699	427775	chr12	14408580	14408930	2	chr12	14408698	1.55e-08	12_14408698_C_T	C	T	0.0522	Risk					inactive	DMSO	160.486
12:14408698:C:T	chr12	14408685	14408699	427775	chr12	14408580	14408930	2	chr12	14408698	1.55e-08	12_14408698_C_T	C	T	0.0522	Risk					inactive	E2	114.566
12:14413931:G:C	chr12	14413929	14413943	3521978	chr12	14413360	14414009	5	chr12	14413931	7.34e-09	12_14413931_G_C	G	C	0.0483	Risk	no hit in SNP2TFBS				not-induced	DMSO	3.35199
12:14413931:G:C	chr12	14413929	14413943	3521978	chr12	14413360	14414009	5	chr12	14413931	7.34e-09	12_14413931_G_C	G	C	0.0483	Risk	no hit in SNP2TFBS				not-induced	E2	2.61636
12:28355653:A:T	chr12	28355647	28355661	2497601	chr12	28355530	28356096	7	chr12	28355653	1.75e-11	12_28355653_A_T	A	T	-0.0537	Protective					inactive	DMSO	0.949343
12:28355653:A:T	chr12	28355647	28355661	2497601	chr12	28355530	28356096	7	chr12	28355653	1.75e-11	12_28355653_A_T	A	T	-0.0537	Protective					inactive	E2	0.814843
12:28355654:C:T	chr12	28355647	28355661	2497601	chr12	28355530	28356096	7	chr12	28355654	1.8e-11	12_28355654_C_T	C	T	-0.0536	Protective					inactive	DMSO	0.874897
12:28355654:C:T	chr12	28355647	28355661	2497601	chr12	28355530	28356096	7	chr12	28355654	1.8e-11	12_28355654_C_T	C	T	-0.0536	Protective					inactive	E2	0.746192
12:28355734:C:T	chr12	28355723	28355737	2337404	chr12	28355530	28356096	7	chr12	28355734	1.74e-11	12_28355734_C_T	C	T	-0.0537	Protective					inactive	DMSO	0.412436
12:28355734:C:T	chr12	28355723	28355737	2337404	chr12	28355530	28356096	7	chr12	28355734	1.74e-11	12_28355734_C_T	C	T	-0.0537	Protective					inactive	E2	0.387106
12:28610017:C:T	chr12	28610008	28610022	5098265	chr12	28609961	28610319	1	chr12	28610017	9.32e-10	12_28610017_C_T	C	T	-0.0491	Protective					inactive	DMSO	9.0731
12:28610017:C:T	chr12	28610008	28610022	5098265	chr12	28609961	28610319	1	chr12	28610017	9.32e-10	12_28610017_C_T	C	T	-0.0491	Protective					inactive	E2	7.63649
rs10133262:68407938:G:A	chr14	68407932	68407946	5525324	chr14	68407362	68408238	5	chr14	68407938	1.08e-09	14_68407938_G_A	G	A	0.0578	Risk					inactive	DMSO	4.98335
rs10133262:68407938:G:A	chr14	68407932	68407946	5525324	chr14	68407362	68408238	5	chr14	68407938	1.08e-09	14_68407938_G_A	G	A	0.0578	Risk					inactive	E2	3.59461
rs10197246:202204741:T:C	chr2	202204732	202204746	2133609	chr2	202204674	202204792	1	chr2	202204741	4.31e-11	2_202204741_T_C	T	C	-0.0536	Protective					inactive	DMSO	14.8678
rs10197246:202204741:T:C	chr2	202204732	202204746	2133609	chr2	202204674	202204792	1	chr2	202204741	4.31e-11	2_202204741_T_C	T	C	-0.0536	Protective					inactive	E2	11.0649
rs10816625:110837073:A:G	chr9	110837059	110837073	5307799	chr9	110836908	110837500	5	chr9	110837073	1.51e-16	9_110837073_A_G	A	G	0.1235	Risk	no hit in SNP2TBFS				constitutively active	DMSO	1.06013
rs10816625:110837073:A:G	chr9	110837059	110837073	5307799	chr9	110836908	110837500	5	chr9	110837073	1.51e-16	9_110837073_A_G	A	G	0.1235	Risk	no hit in SNP2TBFS				constitutively active	E2	3.14135
rs11665924:44286982:G:A	chr19	44286981	44286995	8817472	chr19	44286853	44287192	3	chr19	44286982	2.09e-12	19_44286982_G_A	G	A	-0.0518	Protective	Loss of ESR1 predicted in SNP2TFBS	1293	.(<1241)	Decrease	not-induced	DMSO	0.718262
rs11665924:44286982:G:A	chr19	44286981	44286995	8817472	chr19	44286853	44287192	3	chr19	44286982	2.09e-12	19_44286982_G_A	G	A	-0.0518	Protective	Loss of ESR1 predicted in SNP2TFBS	1293	.(<1241)	Decrease	not-induced	E2	0.644979	/5Biosg/CAGCATCATGCACTGAACTGGTGACACTGCCCTTGGCCTCATGCACACCCC	/5Biosg/CAGCATCATGCACTGAACTGATGACACTGCCCTTGGCCTCATGCACACCCC	GGGGTGTGCATGAGGCCAAGGGCAGTGTCACCAGTTCAGTGCATGATGCTG	GGGGTGTGCATGAGGCCAAGGGCAGTGTCATCAGTTCAGTGCATGATGCTG
rs11695384:121163549:G:A	chr2	121163539	121163553	5638552	chr2	121163420	121163732	2	chr2	121163549	1.29e-12	2_121163549_G_A	G	A	-0.0584	Protective	INCREASE predicted for ESR1 and loss predicted for ESR2	1603	1894	Increase	not-induced	DMSO	13.1483
rs11695384:121163549:G:A	chr2	121163539	121163553	5638552	chr2	121163420	121163732	2	chr2	121163549	1.29e-12	2_121163549_G_A	G	A	-0.0584	Protective	INCREASE predicted for ESR1 and loss predicted for ESR2	1603	1894	Increase	not-induced	E2	10.3869	/5Biosg/GAGAGTTGCCAGCCAAGGGGTCAGGGTGGGCTGTCCTCTGTGTAGCCTGCA	/5Biosg/GAGAGTTGCCAGCCAAGGGGTCAGGGTGAGCTGTCCTCTGTGTAGCCTGCA	TGCAGGCTACACAGAGGACAGCCCACCCTGACCCCTTGGCTGGCAACTCTC	TGCAGGCTACACAGAGGACAGCTCACCCTGACCCCTTGGCTGGCAACTCTC
rs12186589:44567933:C:T	chr5	44567932	44567946	2155013	chr5	44567678	44568078	4	chr5	44567933	3.62e-16	5_44567933_C_T	C	T	-0.0931	Protective	no hit in SNP2TBFS				induced	DMSO	0.140333
rs12186589:44567933:C:T	chr5	44567932	44567946	2155013	chr5	44567678	44568078	4	chr5	44567933	3.62e-16	5_44567933_C_T	C	T	-0.0931	Protective	no hit in SNP2TBFS				induced	E2	0.100608
rs17164263:91581566:T:A	chr7	91581555	91581569	3933154	chr7	91581528	91581978	2	chr7	91581566	4.07e-09	7_91581566_T_A	T	A	-0.0442	Protective					inactive	DMSO	10.0844
rs17164263:91581566:T:A	chr7	91581555	91581569	3933154	chr7	91581528	91581978	2	chr7	91581566	4.07e-09	7_91581566_T_A	T	A	-0.0442	Protective					inactive	E2	7.789
rs2267371:38577119:T:G	chr22	38577109	38577123	2380341	chr22	38576916	38577241	4	chr22	38577119	3.78e-15	22_38577119_T_G	T	G	-0.0616	Protective					inactive	DMSO	0.376912
rs2267371:38577119:T:G	chr22	38577109	38577123	2380341	chr22	38576916	38577241	4	chr22	38577119	3.78e-15	22_38577119_T_G	T	G	-0.0616	Protective					inactive	E2	0.348546
rs444242:23651702:G:T	chr8	23651700	23651714	4154541	chr8	23651509	23651991	12	chr8	23651702	9.11e-09	8_23651702_G_T	G	T	0.0425	Risk					inactive	DMSO	3.53567
rs444242:23651702:G:T	chr8	23651700	23651714	4154541	chr8	23651509	23651991	12	chr8	23651702	9.11e-09	8_23651702_G_T	G	T	0.0425	Risk					inactive	E2	2.85184
rs56373249:22481961:T:C	chr10	22481947	22481961	5981508	chr10	22481669	22482058	1	chr10	22481961	2.52e-13	10_22481961_T_C	T	C	0.1928	Risk	no hit in SNP2TBFS				not-induced	DMSO	2.83357
rs56373249:22481961:T:C	chr10	22481947	22481961	5981508	chr10	22481669	22482058	1	chr10	22481961	2.52e-13	10_22481961_T_C	T	C	0.1928	Risk	no hit in SNP2TBFS				not-induced	E2	2.43318
rs583298:27361880:T:C	chr3	27361866	27361880	4905231	chr3	27361439	27362104	8	chr3	27361880	8.01e-54	3_27361880_T_C	T	C	0.1144	Risk					inactive	DMSO	1.87287
rs583298:27361880:T:C	chr3	27361866	27361880	4905231	chr3	27361439	27362104	8	chr3	27361880	8.01e-54	3_27361880_T_C	T	C	0.1144	Risk					inactive	E2	1.28152
rs61225847:91700641:AAT:A	chr7	91700635	91700649	2983036	chr7	91700345	91700715	2	chr7	91700641	2.11e-09	7_91700641_AAT_A	AAT	A	0.045	Risk					inactive	DMSO	1.36495
rs61225847:91700641:AAT:A	chr7	91700635	91700649	2983036	chr7	91700345	91700715	2	chr7	91700641	2.11e-09	7_91700641_AAT_A	AAT	A	0.045	Risk					inactive	E2	1.23942
rs62174798:217866815:T:G	chr2	217866813	217866827	2354843	chr2	217866670	217866916	1	chr2	217866815	1.21e-09	2_217866815_T_G	T	G	-0.1331	Protective					inactive	DMSO	0.906814
rs62174798:217866815:T:G	chr2	217866813	217866827	2354843	chr2	217866670	217866916	1	chr2	217866815	1.21e-09	2_217866815_T_G	T	G	-0.1331	Protective					inactive	E2	0.822901
rs673791:1885025:C:G	chr11	1885011	1885025	5571951	chr11	1884792	1885142	1	chr11	1885025	3.54e-10	11_1885025_C_G	C	G	-0.048	Protective	no hit in SNP2TBFS				not-induced	DMSO	2.10095
rs673791:1885025:C:G	chr11	1885011	1885025	5571951	chr11	1884792	1885142	1	chr11	1885025	3.54e-10	11_1885025_C_G	C	G	-0.048	Protective	no hit in SNP2TBFS				not-induced	E2	1.48966
rs7033853:110894500:T:C	chr9	110894487	110894501	4909078	chr9	110894433	110894583	1	chr9	110894500	2.35e-21	9_110894500_T_C	T	C	0.0813	Risk	ESSRA1; decided not to follow-up because not in phylogenetic tree ER.	1383	.(<1383)	Decrease	not-induced	DMSO	1.10034
rs7033853:110894500:T:C	chr9	110894487	110894501	4909078	chr9	110894433	110894583	1	chr9	110894500	2.35e-21	9_110894500_T_C	T	C	0.0813	Risk	ESSRA1; decided not to follow-up because not in phylogenetic tree ER.	1383	.(<1383)	Decrease	not-induced	E2	0.808114
rs7153476:69033230:G:T	chr14	69033228	69033242	4914061	chr14	69032712	69033282	7	chr14	69033230	1.41e-16	14_69033230_G_T	G	T	-0.061	Protective					inactive	DMSO	12.2603
rs7153476:69033230:G:T	chr14	69033228	69033242	4914061	chr14	69032712	69033282	7	chr14	69033230	1.41e-16	14_69033230_G_T	G	T	-0.061	Protective					inactive	E2	9.18867
rs7276622:16572276:G:A	chr21	16572275	16572289	2045963	chr21	16571947	16572800	21	chr21	16572276	2.72e-30	21_16572276_G_A	G	A	-0.0911	Protective	No hit in SNP2TFBS				not-induced	DMSO	3.91216
rs7276622:16572276:G:A	chr21	16572275	16572289	2045963	chr21	16571947	16572800	21	chr21	16572276	2.72e-30	21_16572276_G_A	G	A	-0.0911	Protective	No hit in SNP2TFBS				not-induced	E2	3.26688
rs78040234:218253049:A:T	chr2	218253049	218253063	4046763	chr2	218252595	218253232	29	chr2	218253049	1.09e-11	2_218253049_A_T	A	T	0.085	Risk	MEIS1				not-induced	DMSO	2.5488
rs78040234:218253049:A:T	chr2	218253049	218253063	4046763	chr2	218252595	218253232	29	chr2	218253049	1.09e-11	2_218253049_A_T	A	T	0.085	Risk	MEIS1				not-induced	E2	2.02915
rs9952980:42888797:T:C	chr18	42888793	42888807	12264255	chr18	42888465	42889093	11	chr18	42888797	1.48e-12	18_42888797_T_C	T	C	-0.0549	Protective	loss predicted for ESR2 in SNP2TFBS_inpaper	1434	.(<1307)	Decrease	induced	DMSO	1.05383
rs9952980:42888797:T:C	chr18	42888793	42888807	12264255	chr18	42888465	42889093	11	chr18	42888797	1.48e-12	18_42888797_T_C	T	C	-0.0549	Protective	loss predicted for ESR2 in SNP2TFBS_inpaper	1434	.(<1307)	Decrease	induced	E2	0.788036	/5Biosg/AAACACAATGCTTTAAAATGTCACCATGACCATCTGGTTGTTGCCTATCAG	/5Biosg/AAACACAATGCTTTAAAATGCCACCATGACCATCTGGTTGTTGCCTATCAG	CTGATAGGCAACAACCAGATGGTCATGGTGACATTTTAAAGCATTGTGTTT	CTGATAGGCAACAACCAGATGGTCATGGTGGCATTTTAAAGCATTGTGTTT
