# Supplementary material for: Estrogen receptor 1 chromatin profiling in human breast tumors reveals high inter-patient heterogeneity with enrichment of risk SNPs and enhancer activity at most-conserved regions
Source: HighWire-hosted journal article supplement (doi:10.1101/gr.278680.123), 2024-05-06
Supplement: Supplemental_Table_S6.xlsx [file Supplemental_Table_S6.xlsx]

## Sheet: Supplemental_Table_S6
Supplemental Table S6 | ESR1 STARR-seq differential analysis results
seqnames	start	end	baseMean	log2FoldChange_e2.vs.veh	lfcSE	stat	pvalue	padj	active_veh	active_e2	diff.activity	bin	rawCounts_MCF7_veh_rep2	rawCounts_MCF7_e2_rep2	rawCounts_MCF7_veh_rep3	rawCounts_MCF7_e2_rep3	rawCounts_MCF7_veh_rep4	rawCounts_MCF7_e2_rep4	rawCounts_LIB_ER	DESeq2.norm_MCF7_veh_rep2	DESeq2.norm_MCF7_e2_rep2	DESeq2.norm_MCF7_veh_rep3	DESeq2.norm_MCF7_e2_rep3	DESeq2.norm_MCF7_veh_rep4	DESeq2.norm_MCF7_e2_rep4	DESeq2.norm_LIB_ER
chr1	566619	567119	0.105481	1.20098	4.85678	0.24728	0.804692	0.922346	FALSE	FALSE	inactive	'1-2	0	1	0	0	0	0	1	0	1.02578	0	0	0	0	0.556424
chr1	866132	866632	3270.17	-0.0708029	0.0963147	-0.73512	0.462266	0.754597	TRUE	TRUE	not-induced	'1-2	3347	2859	4290	2273	3217	3727	5250	3182.71	2932.72	3162.82	3178	2951.85	2748.96	2921.23
chr1	934461	934961	4227.67	0.323218	0.398847	0.810381	0.417721	0.729036	FALSE	TRUE	not-induced	'1-2	2355	4124	5182	1930	3213	5885	6406	2239.4	4230.34	3820.45	2698.43	2948.18	4340.66	3564.46
chr1	1007900	1009922	182603	1.53087	0.19345	7.91353	2.50183e-15	6.81403e-14	TRUE	TRUE	induced	'1-2	183646	533677	273299	474678	252772	740185	23715	174631	547438	201491	663672	231938	545945	13195.6
chr1	1079659	1081074	17065.3	1.18008	0.225757	5.22724	1.7206e-07	2.539e-06	FALSE	TRUE	induced	'1-2	5527	9792	6151	9395	5269	13505	9332	5255.7	10044.5	4534.84	13135.6	4834.72	9961.01	5192.55
chr1	1143461	1143961	2123.17	-0.206596	0.121663	-1.69811	0.0894876	0.353674	TRUE	TRUE	not-induced	'1-2	2777	2029	3334	1637	3250	3562	2892	2640.69	2081.32	2458	2288.77	2982.13	2627.26	1609.18
chr1	1839986	1840486	7900.7	-0.152562	0.132884	-1.14808	0.250936	0.588223	TRUE	TRUE	not-induced	'1-2	8039	6464	10859	4758	7661	9653	5929	7644.39	6630.67	8005.83	6652.4	7029.56	7119.85	3299.04
chr1	2518349	2518730	5406.34	-0.0269627	0.182455	-0.147777	0.882519	0.955405	TRUE	TRUE	not-induced	'1-2	5021	4546	6357	2860	4965	6904	7823	4774.54	4663.22	4686.72	3998.71	4555.77	5092.25	4352.91
chr1	3691932	3692432	2689.77	-0.0551122	0.0912874	-0.603722	0.546029	0.804831	TRUE	TRUE	not-induced	'1-2	3006	2623	3740	1918	3004	3641	4586	2858.45	2690.63	2757.33	2681.65	2756.4	2685.53	2551.76
chr1	6293118	6293618	555.744	0.380803	0.113155	3.36534	0.000764502	0.00738623	TRUE	TRUE	not-induced	'1-2	694	919	958	677	922	1341	779	659.934	942.696	706.289	946.549	846.006	989.094	433.455
chr1	6507377	6507864	8608.04	0.103737	0.115256	0.900058	0.368089	0.694249	TRUE	TRUE	not-induced	'1-2	4203	4115	5099	2948	4115	5489	4974	3996.69	4221.1	3759.25	4121.75	3775.83	4048.57	2767.66
chr1	7194784	7195284	62.1747	-0.044511	0.209018	-0.212952	0.831364	0.933318	FALSE	FALSE	inactive	'1-2	101	76	98	57	105	130	201	96.0423	77.9596	72.2508	79.6946	96.3456	95.8853	111.841
chr1	7196579	7197079	812.212	-0.130926	0.114243	-1.14603	0.251783	0.588853	FALSE	FALSE	inactive	'1-2	1177	989	1370	644	1088	1273	2250	1119.23	1014.5	1010.04	900.41	998.324	938.939	1251.96
chr1	8963900	8964365	2391.13	-0.122122	0.155846	-0.783605	0.433272	0.736955	TRUE	TRUE	not-induced	'1-2	1270	1103	1775	843	1396	1599	936	1207.66	1131.44	1308.62	1178.64	1280.94	1179.39	520.813
chr1	9184590	9185518	270.868	-0.0921032	0.171307	-0.53765	0.590819	0.824464	FALSE	FALSE	inactive	'1-2	221	204	240	146	251	227	587	210.152	209.26	176.941	204.13	230.312	167.431	326.621
chr1	9222816	9224446	5735.83	-0.268748	0.197998	-1.35733	0.174678	0.497769	TRUE	TRUE	not-induced	'1-2	7741	5393	9513	4340	10378	11160	2811	7361.02	5532.06	7013.49	6067.98	9522.62	8231.39	1564.11
chr1	9242236	9242736	20448.9	-0.175365	0.223128	-0.785938	0.431904	0.736955	TRUE	TRUE	not-induced	'1-2	46350	32221	56915	29107	33841	40594	1359	44074.8	33051.8	41960.8	40696	31051.7	29941.3	756.181
chr1	9471029	9471529	572.884	0.0451083	0.0971796	0.464175	0.642523	0.849843	FALSE	FALSE	inactive	'1-2	422	409	632	337	464	608	1977	401.286	419.546	465.944	471.177	425.756	448.448	1100.05
chr1	9600083	9600583	3274.89	-0.153993	0.109186	-1.41037	0.15843	0.473765	TRUE	TRUE	not-induced	'1-2	3451	2715	4571	2109	3377	4107	3627	3281.6	2785.01	3369.98	2948.7	3098.66	3029.24	2018.15
chr1	9922989	9923275	312.276	0.932001	0.131878	7.06713	1.5817e-12	3.4795e-11	TRUE	TRUE	not-induced	'1-2	264	486	367	409	311	644	403	251.041	498.531	270.572	571.844	285.367	475.001	224.239
chr1	10116269	10116769	179.048	0.0511649	0.17171	0.297974	0.765723	0.905556	FALSE	FALSE	inactive	'1-2	187	188	187	118	191	204	473	177.821	192.848	137.866	164.982	175.257	150.466	263.189
chr1	10458503	10459360	8436.56	-0.0796374	0.0815194	-0.976914	0.328612	0.662109	TRUE	TRUE	not-induced	'1-2	11769	9713	13812	7069	10879	13320	10202	11191.3	9963.45	10182.9	9883.53	9982.32	9824.56	5676.64
chr1	10535058	10535558	3920.43	-0.139597	0.114116	-1.22328	0.221223	0.555739	TRUE	TRUE	not-induced	'1-2	1860	1475	2374	1107	2005	2438	1581	1768.7	1513.03	1750.24	1547.75	1839.74	1798.22	879.707
chr1	10715686	10716186	3548.32	-0.0793154	0.0972284	-0.815763	0.414636	0.727648	TRUE	TRUE	not-induced	'1-2	3559	2969	4208	2103	3260	4045	4893	3384.3	3045.55	3102.36	2940.31	2991.3	2983.51	2722.58
chr1	10862961	10863461	695.743	-0.0972412	0.0917803	-1.0595	0.289372	0.62652	TRUE	TRUE	not-induced	'1-2	834	674	1026	546	825	956	971	793.062	691.379	756.422	763.391	757.001	705.126	540.288
chr1	12608946	12610421	9470.24	0.434481	0.154206	2.81754	0.00483926	0.0387656	TRUE	TRUE	not-induced	'1-2	5849	6976	7133	5587	7013	11321	4740	5561.89	7155.87	5258.83	7811.47	6434.97	8350.14	2637.45
chr1	15205432	15205932	240.257	-0.149603	0.166303	-0.899583	0.368342	0.694296	FALSE	FALSE	inactive	'1-2	303	219	317	165	201	250	496	288.127	224.647	233.709	230.695	184.433	184.395	275.987
chr1	15436419	15436919	8.22521	-0.880955	0.73372	-1.20067	0.229879	0.566049	FALSE	FALSE	inactive	'1-2	16	2	4	3	4	7	51	15.2146	2.05157	2.94901	4.19445	3.67031	5.16306	28.3776
chr1	15850824	15851659	4954.45	-0.227359	0.180619	-1.25878	0.208111	0.541346	FALSE	FALSE	inactive	'1-2	8099	5299	9854	4909	7179	8289	14113	7701.45	5435.63	7264.89	6863.53	6587.29	6113.8	7852.82
chr1	16941036	16941536	1685.03	-0.026195	0.120344	-0.217668	0.827688	0.932331	FALSE	FALSE	inactive	'1-2	1873	1720	2218	1069	1744	2255	4761	1781.06	1764.35	1635.23	1494.62	1600.25	1663.24	2649.14
chr1	20204518	20205018	65.242	0.179037	0.230056	0.778231	0.436433	0.738265	FALSE	FALSE	inactive	'1-2	93	75	71	65	75	95	204	88.435	76.9339	52.345	90.8798	68.8183	70.0701	113.511
chr1	20959907	20960407	2896.97	0.462533	0.60263	0.767525	0.44277	0.742682	FALSE	FALSE	inactive	'1-2	840	2002	2208	701	1458	2919	3165	798.767	2053.62	1627.86	980.104	1337.83	2152.99	1761.08
chr1	21602986	21605294	1767.63	-0.123617	0.0750652	-1.64679	0.0996006	0.374742	FALSE	FALSE	inactive	'1-2	1724	1488	2260	1087	1792	2032	3509	1639.37	1526.37	1666.19	1519.79	1644.3	1498.76	1952.49
chr1	22002695	22003195	73.8884	-0.379722	0.191451	-1.98339	0.0473244	0.239283	TRUE	FALSE	not-induced	'1-2	92	44	100	52	90	94	118	87.484	45.1345	73.7253	72.7039	82.582	69.3325	65.6581
chr1	23769186	23769686	925.121	-0.14619	0.0957718	-1.52644	0.1269	0.427118	FALSE	FALSE	inactive	'1-2	1153	938	1401	681	1083	1233	2290	1096.4	962.186	1032.89	952.141	993.736	909.436	1274.21
chr1	23773257	23773757	307.834	0.0461019	0.131384	0.350894	0.725668	0.887776	FALSE	FALSE	inactive	'1-2	371	356	499	274	461	582	1010	352.789	365.179	367.889	383.094	423.003	429.271	561.989
chr1	24616475	24616975	849.655	0.0416739	0.118151	0.352716	0.724302	0.887346	FALSE	FALSE	inactive	'1-2	679	682	821	473	755	867	1477	645.67	699.585	605.285	661.326	692.771	639.481	821.839
chr1	25120365	25120827	318.637	0.0652029	0.161612	0.403452	0.686616	0.87131	FALSE	FALSE	inactive	'1-2	312	365	479	236	320	388	712	296.685	374.411	353.144	329.964	293.625	286.181	396.174
chr1	25805044	25805544	107.904	-0.301626	0.171888	-1.75478	0.0792964	0.32882	FALSE	FALSE	inactive	'1-2	93	74	155	58	97	110	224	88.435	75.9081	114.274	81.0928	89.005	81.1337	124.639
chr1	27384432	27384932	452.393	0.06334	0.14881	0.425644	0.670367	0.863932	FALSE	FALSE	inactive	'1-2	417	471	607	264	422	586	840	396.531	483.145	447.513	369.112	387.218	432.222	467.397
chr1	27462611	27463111	1092.44	-0.0542399	0.0728749	-0.744287	0.456703	0.750997	TRUE	TRUE	not-induced	'1-2	1546	1296	1895	990	1559	1928	2039	1470.11	1329.42	1397.09	1384.17	1430.5	1422.05	1134.55
chr1	27855222	27856759	3614	-0.105316	0.0983706	-1.07061	0.284346	0.622739	TRUE	FALSE	not-induced	'1-2	4486	3337	5163	2874	4810	5643	7437	4265.8	3423.04	3806.44	4018.29	4413.55	4162.16	4138.13
chr1	29508282	29508782	11819.8	0.0210669	0.144515	0.145777	0.884098	0.956055	TRUE	TRUE	not-induced	'1-2	4318	4032	6200	3117	5102	6858	3367	4106.04	4135.96	4570.97	4358.04	4681.48	5058.32	1873.48
chr1	32279611	32280111	2000.43	-0.153618	0.114502	-1.34162	0.179718	0.506127	TRUE	TRUE	not-induced	'1-2	1495	1257	2017	889	1411	1691	1851	1421.62	1289.41	1487.04	1242.96	1294.7	1247.25	1029.94
chr1	36059207	36059707	486.749	0.0388508	0.0921995	0.421378	0.673479	0.864957	FALSE	FALSE	inactive	'1-2	546	583	732	385	595	698	1179	519.199	598.032	539.669	538.288	545.959	514.83	656.024
chr1	36902382	36902882	2993.07	-0.252029	0.161458	-1.56096	0.118534	0.411388	TRUE	TRUE	not-induced	'1-2	6417	4976	8327	3890	7445	7419	792	6102.01	5104.3	6139.11	5438.81	6831.36	5472.1	440.688
chr1	37899782	37900282	855.048	0.0236581	0.0760741	0.310988	0.75581	0.900986	FALSE	FALSE	inactive	'1-2	969	922	1264	661	1027	1313	1731	921.435	945.773	931.888	924.178	942.352	968.442	963.171
chr1	37960989	37961489	133.039	-0.364303	0.154092	-2.3642	0.0180693	0.116279	TRUE	TRUE	not-induced	'1-2	282	207	295	112	250	248	231	268.158	212.337	217.49	156.593	229.394	182.92	128.534
chr1	39616392	39616892	245.763	-0.166578	0.11017	-1.512	0.130534	0.432962	TRUE	FALSE	not-induced	'1-2	318	269	411	191	308	340	532	302.391	275.936	303.011	267.047	282.614	250.777	296.018
chr1	40311263	40311763	548.596	-0.110606	0.0875462	-1.2634	0.206444	0.539984	TRUE	TRUE	not-induced	'1-2	684	569	957	457	711	867	1063	650.425	583.671	705.551	638.955	652.398	639.481	591.479
chr1	41177136	41177636	311.085	0.0954219	0.184643	0.516792	0.605301	0.832151	TRUE	TRUE	not-induced	'1-2	317	311	482	238	261	418	490	301.44	319.019	355.356	332.76	239.488	308.308	272.648
chr1	41388436	41390419	4963.46	0.331606	0.103015	3.21899	0.00128642	0.0119058	TRUE	TRUE	not-induced	'1-2	3795	4309	5213	3565	4476	6970	6554	3608.72	4420.11	3843.3	4984.41	4107.08	5140.93	3646.81
chr1	41410615	41410889	118.987	0.1762	0.183925	0.958001	0.338062	0.670451	TRUE	TRUE	not-induced	'1-2	107	152	181	89	130	165	192	101.748	155.919	133.443	124.435	119.285	121.701	106.833
chr1	41658134	41658634	366.355	0.0111365	0.109518	0.101686	0.919006	0.968692	FALSE	FALSE	inactive	'1-2	434	320	512	302	387	549	1148	412.696	328.251	377.474	422.242	355.102	404.931	638.775
chr1	42236982	42237482	141.362	-0.0397285	0.192145	-0.206763	0.836195	0.935714	FALSE	FALSE	inactive	'1-2	132	114	151	65	127	178	318	125.521	116.939	111.325	90.8798	116.532	131.289	176.943
chr1	43602486	43602986	279.743	-0.0415084	0.132394	-0.313521	0.753885	0.900614	FALSE	FALSE	inactive	'1-2	252	295	402	178	307	332	807	239.63	302.606	296.376	248.871	281.696	244.876	449.035
chr1	43861844	43862344	104.904	-0.150612	0.198782	-0.757677	0.448645	0.745603	FALSE	FALSE	inactive	'1-2	126	107	140	82	139	126	313	119.815	109.759	103.215	114.648	127.543	92.935	174.161
chr1	43994836	43995336	236.858	-0.0840642	0.133876	-0.627924	0.530054	0.795142	FALSE	FALSE	inactive	'1-2	296	246	377	190	285	349	754	281.47	252.343	277.944	265.649	261.51	257.415	419.544
chr1	44223578	44223973	44.3541	0.488916	0.302863	1.61431	0.10646	0.387543	FALSE	FALSE	inactive	'1-2	35	47	36	42	42	45	258	33.282	48.2119	26.5411	58.7224	38.5382	33.1911	143.558
chr1	46504887	46505804	1293.82	0.00978843	0.0767197	0.127587	0.898476	0.96307	FALSE	FALSE	inactive	'1-2	1404	1274	1663	948	1422	1710	2952	1335.08	1306.85	1226.05	1325.45	1304.8	1261.26	1642.57
chr1	47973636	47974136	1239.39	-0.0267282	0.174447	-0.153217	0.878227	0.953948	TRUE	TRUE	not-induced	'1-2	1008	1077	1589	647	1204	1577	1715	958.521	1104.77	1171.5	904.604	1104.76	1163.16	954.268
chr1	48680486	48680986	469.374	-0.0814823	0.149852	-0.543753	0.586612	0.822752	FALSE	FALSE	inactive	'1-2	377	296	527	252	363	495	749	358.494	303.632	388.532	352.334	333.081	365.102	416.762
chr1	49649282	49649782	128.211	0.195041	0.149677	1.30308	0.192547	0.523388	FALSE	FALSE	inactive	'1-2	137	147	190	118	128	181	313	130.275	150.79	140.078	164.982	117.45	133.502	174.161
chr1	53879336	53879836	1004.99	-0.0520293	0.11377	-0.457319	0.647442	0.852611	FALSE	FALSE	inactive	'1-2	1153	965	1614	805	1164	1521	3301	1096.4	989.882	1189.93	1125.51	1068.06	1121.86	1836.76
chr1	53991425	53991912	1792.46	0.205532	0.0832134	2.46994	0.0135137	0.0922794	TRUE	TRUE	not-induced	'1-2	2106	2122	2834	1695	2042	3167	3048	2002.62	2176.72	2089.38	2369.87	1873.69	2335.91	1695.98
chr1	54602932	54603432	783.67	0.0531722	0.103113	0.515671	0.606084	0.832587	FALSE	FALSE	inactive	'1-2	515	419	644	359	520	758	1630	489.72	429.804	474.791	501.936	477.14	559.085	906.972
chr1	56392982	56393482	420.654	-0.0785475	0.141949	-0.553349	0.580025	0.820272	FALSE	FALSE	inactive	'1-2	541	518	700	270	437	602	919	514.444	531.356	516.077	377.501	400.981	444.023	511.354
chr1	58265409	58265909	326.517	-0.0710033	0.119016	-0.596584	0.550785	0.807151	FALSE	FALSE	inactive	'1-2	425	384	599	254	404	551	905	404.138	393.901	441.615	355.13	370.701	406.406	503.564
chr1	58472982	58473482	127.937	-0.233817	0.140061	-1.66939	0.0950395	0.365314	FALSE	FALSE	inactive	'1-2	159	129	197	100	173	160	300	151.195	132.326	145.239	139.815	158.741	118.013	166.927
chr1	59058094	59058635	6799.47	0.158294	0.115177	1.37436	0.16933	0.488924	TRUE	TRUE	not-induced	'1-2	710	716	914	609	811	1022	784	675.149	734.462	673.849	851.474	744.155	753.806	436.237
chr1	59335981	59336516	635.926	-0.0159748	0.144274	-0.110725	0.911834	0.966216	FALSE	FALSE	inactive	'1-2	377	332	453	223	369	493	773	358.494	340.561	333.976	311.788	338.586	363.627	430.116
chr1	59616653	59617137	550.658	-0.0865283	0.0901404	-0.959928	0.337091	0.669772	TRUE	TRUE	not-induced	'1-2	885	680	1076	604	907	1064	1083	841.558	697.534	793.285	844.483	832.243	784.785	602.608
chr1	62901522	62902691	18898.3	-0.0412128	0.100883	-0.408522	0.682891	0.869579	TRUE	TRUE	not-induced	'1-2	9157	7255	11215	6412	9485	11593	5478	8707.52	7442.07	8268.3	8964.95	8703.22	8550.76	3048.09
chr1	65401184	65401684	614.823	-0.150727	0.114762	-1.31338	0.189053	0.518843	FALSE	FALSE	inactive	'1-2	767	669	977	488	954	980	1526	729.351	686.25	720.296	682.298	875.369	722.828	849.104
chr1	65452994	65453494	687.433	-0.0860435	0.0859368	-1.00124	0.31671	0.651978	FALSE	FALSE	inactive	'1-2	784	639	1040	548	759	907	1926	745.516	655.476	766.743	766.187	696.441	668.985	1071.67
chr1	65886282	65886782	8485.64	-0.00858536	0.103309	-0.083104	0.933769	0.975839	TRUE	TRUE	not-induced	'1-2	4458	3651	6247	3373	4676	6236	3451	4239.17	3745.14	4605.62	4715.96	4290.59	4599.55	1920.22
chr1	67847960	67848460	1232.27	-0.0337673	0.0786916	-0.429109	0.667844	0.863427	FALSE	FALSE	inactive	'1-2	1349	1171	1668	870	1276	1603	3501	1282.78	1201.19	1229.74	1216.39	1170.83	1182.34	1948.04
chr1	71218186	71218686	716.839	-0.159494	0.111203	-1.43425	0.1515	0.463922	FALSE	FALSE	inactive	'1-2	1013	774	1117	542	833	993	1674	963.275	793.957	823.512	757.798	764.342	732.416	931.455
chr1	82625648	82626148	183.055	-0.292938	0.163166	-1.79534	0.0726	0.311744	FALSE	FALSE	inactive	'1-2	268	160	316	154	250	280	483	254.845	164.126	232.972	215.315	229.394	206.522	268.753
chr1	84267663	84268428	291.498	-0.0524198	0.114182	-0.459088	0.646171	0.851795	FALSE	FALSE	inactive	'1-2	284	277	455	223	329	386	713	270.059	284.142	335.45	311.788	301.883	284.706	396.731
chr1	84621632	84622132	125.681	-0.0353348	0.150109	-0.235394	0.813903	0.925928	FALSE	FALSE	inactive	'1-2	138	120	157	89	141	162	284	131.226	123.094	115.749	124.435	129.378	119.488	158.025
chr1	85249154	85249654	729.33	-0.00907486	0.107669	-0.084285	0.93283	0.975429	FALSE	FALSE	inactive	'1-2	702	681	876	461	696	812	2067	667.541	698.559	645.834	644.548	638.634	598.915	1150.13
chr1	85961164	85961619	552.516	0.319551	0.120568	2.65039	0.0080399	0.0598451	TRUE	TRUE	not-induced	'1-2	601	739	781	574	695	911	632	571.499	758.055	575.795	802.539	637.716	671.935	351.66
chr1	88974995	88975358	300.79	1.46846	0.16162	9.08585	1.02887e-19	3.9548e-18	TRUE	TRUE	induced	'1-2	198	603	333	492	271	797	337	188.281	618.548	245.505	687.891	248.663	587.851	187.515
chr1	92292943	92293764	731.724	-0.160479	0.0725229	-2.2128	0.0269114	0.160069	FALSE	FALSE	inactive	'1-2	898	788	1201	530	940	1052	1676	853.92	808.318	885.441	741.02	862.523	775.934	932.567
chr1	94911175	94911691	28.3955	0.0404729	0.26919	0.150351	0.880488	0.95517	TRUE	TRUE	not-induced	'1-2	36	32	38	30	42	41	42	34.2329	32.8251	28.0156	41.9445	38.5382	30.2408	23.3698
chr1	95142045	95142842	327.253	0.135078	0.112199	1.20391	0.228624	0.564708	FALSE	FALSE	inactive	'1-2	330	356	414	229	311	419	634	313.801	365.179	305.223	320.177	285.367	309.046	352.773
chr1	95258411	95258911	22.516	0.229748	0.360014	0.638164	0.523367	0.792505	FALSE	FALSE	inactive	'1-2	14	26	28	15	22	23	66	13.3128	26.6704	20.6431	20.9723	20.1867	16.9643	36.724
chr1	100138037	100138537	331.741	-0.137062	0.104423	-1.31256	0.18933	0.519123	FALSE	FALSE	inactive	'1-2	404	321	442	207	357	433	865	384.169	329.277	325.866	289.417	327.575	319.372	481.307
chr1	100878469	100879214	111.504	0.000824011	0.153853	0.00535584	0.995727	0.999074	FALSE	FALSE	inactive	'1-2	120	132	150	70	115	132	292	114.11	135.404	110.588	97.8706	105.521	97.3605	162.476
chr1	108281346	108282590	337.945	-0.0679412	0.131987	-0.514757	0.606723	0.832964	FALSE	FALSE	inactive	'1-2	264	243	460	207	341	437	749	251.041	249.266	339.137	289.417	312.894	322.322	416.762
chr1	108625959	108626459	188.74	-0.130502	0.163613	-0.797625	0.425088	0.73233	FALSE	FALSE	inactive	'1-2	163	138	227	124	185	188	420	154.999	141.558	167.356	173.371	169.752	138.665	233.698
chr1	110259861	110261586	1134.13	-0.177711	0.103478	-1.71738	0.0859101	0.344997	FALSE	FALSE	inactive	'1-2	1467	1162	1877	837	1371	1635	2927	1394.99	1191.96	1383.82	1170.25	1258	1205.94	1628.65
chr1	110421818	110422170	600.582	0.872439	0.215414	4.05005	5.12065e-05	0.000591439	FALSE	TRUE	not-induced	'1-2	395	666	443	531	463	865	832	375.611	683.173	326.603	742.418	424.838	638.006	462.945
chr1	114575717	114576217	699.089	-0.0164609	0.0744386	-0.221134	0.824988	0.930764	TRUE	TRUE	not-induced	'1-2	896	782	1155	570	886	1195	1481	852.019	802.164	851.528	796.946	812.974	881.408	824.065
chr1	114915007	114915507	0.901568	0	2.0311	0	1	1	FALSE	FALSE	inactive	'1-2	0	0	0	0	0	0	0	0	0	0	0	0	0	0
chr1	118116989	118117622	629.5	-0.137377	0.0906366	-1.51569	0.129597	0.431645	FALSE	FALSE	inactive	'1-2	555	478	752	327	547	665	1600	527.757	490.325	554.414	457.196	501.915	490.49	890.279
chr1	119203311	119203811	100.644	-0.133885	0.157736	-0.848787	0.396	0.71513	FALSE	FALSE	inactive	'1-2	99	95	145	74	132	128	243	94.1404	97.4495	106.902	103.463	121.12	94.4102	135.211
chr1	120202886	120203705	551.469	-0.0410005	0.146212	-0.280418	0.779157	0.911391	FALSE	FALSE	inactive	'1-2	652	545	666	332	496	673	1525	619.996	559.053	491.011	464.186	455.118	496.391	848.547
chr1	145397705	145398205	117.582	0.0741708	0.181533	0.40858	0.682848	0.869579	FALSE	FALSE	inactive	'1-2	61	79	116	70	100	100	436	58.0057	81.037	85.5214	97.8706	91.7577	73.758	242.601
chr1	147283358	147283858	914.396	-0.193102	0.0778102	-2.48171	0.0130754	0.0898868	TRUE	FALSE	not-induced	'1-2	1073	870	1402	647	1007	1107	1744	1020.33	892.433	1033.63	904.604	924	816.501	970.404
chr1	150227840	150228340	346.785	-0.236145	0.106943	-2.20814	0.0272344	0.160919	FALSE	FALSE	inactive	'1-2	391	317	571	270	469	462	881	371.807	325.174	420.972	377.501	430.344	340.762	490.21
chr1	153301452	153301952	17.0043	-0.679796	0.424824	-1.60018	0.109558	0.392526	FALSE	FALSE	inactive	'1-2	29	5	16	8	21	25	60	27.5765	5.12892	11.7961	11.1852	19.2691	18.4395	33.3855
chr1	153462793	153463452	1167.86	-0.0340115	0.0694812	-0.489506	0.624483	0.84169	TRUE	TRUE	not-induced	'1-2	1453	1293	1771	857	1359	1775	2004	1381.68	1326.34	1305.68	1198.22	1246.99	1309.2	1115.07
chr1	155131358	155131858	784.31	-0.0372971	0.117554	-0.317277	0.751033	0.899265	FALSE	FALSE	inactive	'1-2	969	794	1129	588	964	1260	2633	921.435	814.473	832.359	822.113	884.545	929.35	1465.07
chr1	156024006	156024999	12804.4	-0.036193	0.115993	-0.312029	0.755019	0.900868	TRUE	TRUE	not-induced	'1-2	9563	8538	12383	6512	9795	11762	11617	9093.59	8758.15	9129.41	9104.76	8987.67	8675.41	6463.98
chr1	159343920	159344420	263.695	-0.046309	0.14167	-0.326879	0.74376	0.895876	FALSE	FALSE	inactive	'1-2	285	226	323	192	276	325	631	271.01	231.827	238.133	268.445	253.251	239.713	351.104
chr1	159885755	159886255	714.368	-0.256633	0.122509	-2.09482	0.0361873	0.198178	TRUE	TRUE	not-induced	'1-2	1298	914	1473	677	1347	1474	899	1234.29	937.567	1085.97	946.549	1235.98	1087.19	500.226
chr1	159892911	159893411	3476.8	-0.159164	0.0841804	-1.89074	0.0586584	0.275816	TRUE	TRUE	not-induced	'1-2	4333	3250	4789	2545	4194	4618	4904	4120.31	3333.8	3530.71	3558.3	3848.32	3406.14	2728.71
chr1	159940688	159941126	468.609	0.173138	0.141137	1.22673	0.219922	0.553546	FALSE	FALSE	inactive	'1-2	342	393	483	290	447	571	776	325.212	403.133	356.093	405.464	410.157	421.158	431.785
chr1	160555752	160556252	8.29106	1.44279	0.517209	2.78957	0.00527785	0.041649	FALSE	FALSE	inactive	'1-2	3	15	8	6	5	17	23	2.85274	15.3868	5.89803	8.38891	4.58789	12.5389	12.7978
chr1	161088595	161088997	549.655	-0.099101	0.0831331	-1.19208	0.233231	0.568722	FALSE	FALSE	inactive	'1-2	599	549	743	351	619	699	1097	569.597	563.156	547.779	490.751	567.98	515.568	610.398
chr1	163890847	163891347	1.37951	0.198011	1.50633	0.131453	0.895417	0.961996	FALSE	FALSE	inactive	'1-2	0	4	0	0	4	0	6	0	4.10314	0	0	3.67031	0	3.33855
chr1	165464363	165465475	1150.72	-0.0452808	0.0912272	-0.496352	0.619646	0.839364	FALSE	FALSE	inactive	'1-2	1486	1476	1928	927	1586	1823	3173	1413.06	1514.06	1421.42	1296.09	1455.28	1344.61	1765.53
chr1	165742489	165742971	11.5314	-0.00887033	0.548997	-0.0161573	0.987109	0.996211	FALSE	FALSE	inactive	'1-2	5	14	16	5	17	14	31	4.75457	14.361	11.7961	6.99076	15.5988	10.3261	17.2492
chr1	167332952	167333452	69.8419	-0.0776115	0.201665	-0.384854	0.700346	0.876034	FALSE	FALSE	inactive	'1-2	65	59	93	41	66	85	179	61.8094	60.5213	68.5646	57.3242	60.5601	62.6943	99.6
chr1	168753037	168753537	51.6429	-0.0624014	0.2367	-0.263631	0.792064	0.917614	TRUE	TRUE	not-induced	'1-2	60	70	100	40	53	63	85	57.0548	71.8049	73.7253	55.9261	48.6316	46.4675	47.2961
chr1	168849307	168849807	444.755	-0.0178826	0.122981	-0.145409	0.884388	0.956136	FALSE	FALSE	inactive	'1-2	417	407	568	273	399	501	794	396.531	417.494	418.76	381.695	366.113	369.527	441.801
chr1	169714095	169714595	369.37	-0.0148861	0.0934691	-0.159262	0.873462	0.952385	FALSE	FALSE	inactive	'1-2	416	359	545	290	433	554	811	395.58	368.257	401.803	405.464	397.311	408.619	451.26
chr1	170360152	170360652	27.2372	-0.298874	0.319073	-0.936692	0.348917	0.677967	FALSE	FALSE	inactive	'1-2	28	16	36	18	41	42	100	26.6256	16.4126	26.5411	25.1667	37.6207	30.9783	55.6424
chr1	172940359	172940859	202.183	0.149372	0.129456	1.15384	0.248564	0.585057	FALSE	FALSE	inactive	'1-2	214	237	298	189	234	281	562	203.495	243.111	219.701	264.251	214.713	207.26	312.711
chr1	174208927	174209427	123.681	0.10186	0.17375	0.586247	0.557709	0.809823	FALSE	FALSE	inactive	'1-2	113	120	166	69	121	192	396	107.453	123.094	122.384	96.4725	111.027	141.615	220.344
chr1	180136968	180138580	6154.76	0.17726	0.138113	1.28344	0.199336	0.530563	TRUE	TRUE	not-induced	'1-2	4555	4416	5505	3555	4687	6575	6627	4331.41	4529.87	4058.58	4970.43	4300.69	4849.59	3687.42
chr1	180502431	180503233	324.687	-0.0432497	0.143708	-0.300955	0.763449	0.904577	FALSE	FALSE	inactive	'1-2	241	216	328	183	316	353	529	229.17	221.569	241.819	255.862	289.954	260.366	294.349
chr1	180554336	180556479	1731.79	-0.0861222	0.0685392	-1.25654	0.20892	0.54248	TRUE	TRUE	not-induced	'1-2	1935	1609	2382	1224	1941	2309	2875	1840.02	1650.49	1756.14	1711.34	1781.02	1703.07	1599.72
chr1	182111586	182112086	1442.49	-0.108495	0.0956884	-1.13384	0.256863	0.594201	FALSE	FALSE	inactive	'1-2	1741	1418	2116	1064	1496	1789	4110	1655.54	1454.56	1560.03	1487.63	1372.7	1319.53	2286.9
chr1	182494527	182495027	46.8865	-0.279737	0.310439	-0.901101	0.367535	0.693763	FALSE	FALSE	inactive	'1-2	79	70	67	30	67	53	163	75.1222	71.8049	49.396	41.9445	61.4777	39.0917	90.6972
chr1	182511527	182512027	11.1977	-0.389471	0.450753	-0.864046	0.387563	0.708291	FALSE	FALSE	inactive	'1-2	15	10	19	14	31	19	41	14.2637	10.2578	14.0078	19.5741	28.4449	14.014	22.8134
chr1	183275299	183276044	122.648	-0.0515166	0.156329	-0.32954	0.741748	0.895118	FALSE	FALSE	inactive	'1-2	121	132	187	93	136	141	465	115.061	135.404	137.866	130.028	124.791	103.999	258.737
chr1	183440463	183441872	13281.2	0.00775438	0.1192	0.0650534	0.948132	0.981662	TRUE	TRUE	not-induced	'1-2	8244	6765	10523	5883	9268	12288	9140	7839.33	6939.43	7758.12	8225.33	8504.11	9063.38	5085.72
chr1	185226772	185227441	28.9087	-0.200294	0.356213	-0.562287	0.573921	0.816891	FALSE	FALSE	inactive	'1-2	28	18	33	16	33	39	79	26.6256	18.4641	24.3294	22.3704	30.2801	28.7656	43.9575
chr1	187155129	187155629	43.265	-0.194261	0.247433	-0.785105	0.432392	0.736955	FALSE	FALSE	inactive	'1-2	57	41	92	32	46	76	130	54.2021	42.0572	67.8273	44.7408	42.2086	56.056	72.3352
chr1	187753852	187754352	95.9564	0.0824124	0.164713	0.500341	0.616835	0.837822	FALSE	FALSE	inactive	'1-2	108	110	119	58	93	129	227	102.699	112.836	87.7331	81.0928	85.3347	95.1478	126.308
chr1	189547027	189547527	86.0809	-0.126994	0.196784	-0.645344	0.518704	0.789971	FALSE	FALSE	inactive	'1-2	96	100	136	65	93	87	297	91.2877	102.578	100.266	90.8798	85.3347	64.1694	165.258
chr1	189650594	189651093	133.068	-0.26428	0.177314	-1.49046	0.136102	0.440885	FALSE	FALSE	inactive	'1-2	116	103	193	75	137	143	392	110.306	105.656	142.29	104.861	125.708	105.474	218.118
chr1	191340768	191341268	75.7532	-0.130455	0.268941	-0.48507	0.627627	0.842698	FALSE	FALSE	inactive	'1-2	57	101	149	44	82	75	233	54.2021	103.604	109.851	61.5187	75.2413	55.3185	129.647
chr1	191678234	191678734	110.627	0.0521181	0.212137	0.245682	0.805928	0.922482	FALSE	FALSE	inactive	'1-2	103	121	202	81	90	145	325	97.9441	124.12	148.925	113.25	82.582	106.949	180.838
chr1	192498948	192499448	107.668	-0.0408875	0.181337	-0.225478	0.821607	0.929007	FALSE	FALSE	inactive	'1-2	92	100	127	66	116	116	404	87.484	102.578	93.6312	92.278	106.439	85.5592	224.795
chr1	197254617	197255117	185.751	-0.21295	0.118862	-1.79158	0.0732006	0.312722	TRUE	TRUE	not-induced	'1-2	268	220	345	158	289	300	351	254.845	225.673	254.352	220.908	265.18	221.274	195.305
chr1	198126534	198127034	4302.69	-0.0398942	0.106934	-0.373074	0.709094	0.881182	TRUE	TRUE	not-induced	'1-2	4419	3771	5586	2758	4379	5794	5433	4202.09	3868.23	4118.3	3856.1	4018.07	4273.54	3023.05
chr1	200168286	200168786	205.749	-0.127914	0.136832	-0.93483	0.349876	0.679369	FALSE	FALSE	inactive	'1-2	250	226	311	136	209	247	403	237.728	231.827	229.286	190.149	191.774	182.182	224.239
chr1	200862557	200863057	2139.37	-0.163827	0.120162	-1.36339	0.172761	0.494655	TRUE	TRUE	not-induced	'1-2	2715	2261	3804	1819	2775	3015	2155	2581.73	2319.3	2804.51	2543.24	2546.28	2223.8	1199.09
chr1	201437661	201438161	8771.66	-0.071159	0.130582	-0.544936	0.585798	0.822579	TRUE	TRUE	not-induced	'1-2	12673	9746	15045	7369	10098	14301	5782	12050.9	9997.3	11092	10303	9265.7	10548.1	3217.25
chr1	202501301	202501756	606.274	1.82979	0.220447	8.30037	1.03784e-16	3.24727e-15	TRUE	TRUE	induced	'1-2	429	1675	604	1184	473	1635	560	407.942	1718.19	445.301	1655.41	434.014	1205.94	311.598
chr1	203291108	203292406	722.317	-0.182704	0.102095	-1.78956	0.0735253	0.313458	FALSE	FALSE	inactive	'1-2	932	705	1085	502	810	968	1923	886.251	723.178	799.92	701.872	743.238	713.977	1070
chr1	205283227	205283514	911.56	-0.0592406	0.0799667	-0.740816	0.458805	0.753383	TRUE	TRUE	not-induced	'1-2	642	520	811	429	609	769	785	610.486	533.408	597.912	599.807	558.805	567.199	436.793
chr1	205419012	205419759	4030.27	-0.112052	0.0950853	-1.17844	0.238623	0.574229	FALSE	FALSE	inactive	'1-2	3517	2840	4344	2104	3423	4211	7759	3344.36	2913.23	3202.63	2941.71	3140.87	3105.95	4317.3
chr1	205469390	205469647	215.231	0.0823298	0.15271	0.539125	0.589801	0.824187	FALSE	FALSE	inactive	'1-2	166	210	338	161	209	270	630	157.852	215.415	249.192	225.102	191.774	199.146	350.547
chr1	205604860	205605360	109.409	-0.067947	0.192782	-0.352455	0.724497	0.887346	FALSE	FALSE	inactive	'1-2	131	101	220	103	117	178	353	124.57	103.604	162.196	144.01	107.357	131.289	196.418
chr1	208021561	208023248	2235.43	0.0375952	0.0981365	0.383091	0.701652	0.876552	TRUE	TRUE	not-induced	'1-2	2472	2254	3028	1837	2571	3051	2136	2350.66	2312.12	2232.4	2568.4	2359.09	2250.36	1188.52
chr1	209045567	209046067	20.991	-0.350793	0.436201	-0.804201	0.421281	0.730501	FALSE	FALSE	inactive	'1-2	20	25	30	9	28	19	61	19.0183	25.6446	22.1176	12.5834	25.6922	14.014	33.9419
chr1	210474536	210475405	466.395	-0.103047	0.0996055	-1.03455	0.30088	0.637888	FALSE	FALSE	inactive	'1-2	466	456	616	279	555	604	1173	443.126	467.758	454.148	390.084	509.255	445.498	652.686
chr1	211353484	211353984	160.788	0.0867078	0.180401	0.480639	0.630773	0.844134	FALSE	FALSE	inactive	'1-2	169	134	191	102	134	228	566	160.704	137.455	140.815	142.611	122.955	168.168	314.936
chr1	211509336	211509788	416.951	-0.0636638	0.118848	-0.535673	0.592185	0.82534	FALSE	FALSE	inactive	'1-2	439	359	464	264	443	509	1141	417.451	368.257	342.086	369.112	406.487	375.428	634.88
chr1	211714668	211716917	2576.91	-0.0989614	0.0825511	-1.19879	0.23061	0.566688	FALSE	FALSE	inactive	'1-2	2649	2347	3560	1612	2599	3208	8949	2518.97	2407.52	2624.62	2253.82	2384.78	2366.16	4979.44
chr1	212407984	212408484	182.106	-0.263551	0.191812	-1.37401	0.169439	0.488963	FALSE	FALSE	inactive	'1-2	195	125	217	111	205	217	368	185.428	128.223	159.984	155.195	188.103	160.055	204.764
chr1	212569827	212570327	315.881	-0.0430755	0.153117	-0.281325	0.778461	0.911296	FALSE	FALSE	inactive	'1-2	479	398	427	221	373	485	1186	455.488	408.262	314.807	308.991	342.256	357.726	659.919
chr1	212640174	212641557	2107.95	0.375989	0.0891201	4.2189	2.45492e-05	0.000293113	TRUE	TRUE	not-induced	'1-2	1706	2038	2394	1685	1779	2817	2290	1622.26	2090.55	1764.98	2355.89	1632.37	2077.76	1274.21
chr1	214969677	214970177	13.3758	-0.425456	0.503821	-0.844458	0.398414	0.716597	FALSE	FALSE	inactive	'1-2	25	13	10	2	11	17	102	23.7728	13.3352	7.37253	2.7963	10.0934	12.5389	56.7553
chr1	215687452	215687952	75.2824	-0.108477	0.181748	-0.59685	0.550608	0.807151	FALSE	FALSE	inactive	'1-2	102	68	130	63	86	127	225	96.9932	69.7534	95.8429	88.0835	78.9117	93.6726	125.196
chr1	217308136	217308636	455.346	-0.114869	0.0952108	-1.20647	0.227635	0.563433	TRUE	FALSE	not-induced	'1-2	414	357	599	287	445	522	723	393.678	366.205	441.615	401.269	408.322	385.017	402.295
chr1	223907279	223909043	940.474	-0.10129	0.0816355	-1.24076	0.214694	0.548197	FALSE	FALSE	inactive	'1-2	1220	941	1532	749	1116	1458	2011	1160.11	965.263	1129.47	1047.22	1024.02	1075.39	1118.97
chr1	224399132	224399632	138.48	-0.412199	0.171011	-2.41036	0.0159368	0.10593	FALSE	FALSE	inactive	'1-2	155	79	188	75	155	179	354	147.392	81.037	138.604	104.861	142.224	132.027	196.974
chr1	225934424	225934761	314.014	0.0601029	0.10696	0.561918	0.574172	0.817066	TRUE	TRUE	not-induced	'1-2	345	326	452	210	333	504	566	328.065	334.406	333.238	293.612	305.553	371.74	314.936
chr1	226878110	226878434	208.342	-0.0887681	0.154346	-0.575126	0.565206	0.812902	FALSE	FALSE	inactive	'1-2	251	194	280	146	214	271	691	238.679	199.002	206.431	204.13	196.362	199.884	384.489
chr1	227279202	227279702	27.224	-0.364726	0.340801	-1.0702	0.284527	0.622945	FALSE	FALSE	inactive	'1-2	42	17	35	13	31	47	80	39.9384	17.4383	25.8039	18.176	28.4449	34.6662	44.514
chr1	228373182	228373682	596.809	-0.0129611	0.100716	-0.12869	0.897603	0.962797	FALSE	FALSE	inactive	'1-2	588	565	698	326	557	716	1053	559.137	579.568	514.603	455.797	511.091	528.107	585.915
chr1	228997003	228997358	1790.65	-0.107695	0.135903	-0.792435	0.428107	0.734346	FALSE	FALSE	inactive	'1-2	1583	1155	1680	893	1363	1725	2590	1505.3	1184.78	1238.59	1248.55	1250.66	1272.32	1441.14
chr1	230208036	230208536	518.22	0.00462153	0.0920778	0.0501916	0.95997	0.98639	FALSE	FALSE	inactive	'1-2	561	564	703	362	571	673	1194	533.463	578.543	518.289	506.131	523.937	496.391	664.371
chr1	231819489	231821384	2981.26	-0.147392	0.066306	-2.2229	0.0262226	0.157017	FALSE	FALSE	inactive	'1-2	3624	2858	4450	2135	3319	3944	6935	3446.11	2931.69	3280.78	2985.05	3045.44	2909.01	3858.8
chr1	232315586	232316086	992.076	0.0172672	0.123532	0.139779	0.888835	0.958532	FALSE	FALSE	inactive	'1-2	754	707	960	503	710	914	1320	716.989	725.23	707.763	703.27	651.48	674.148	734.48
chr1	232736238	232736747	1560.22	-0.121654	0.176375	-0.689746	0.490354	0.77259	TRUE	TRUE	not-induced	'1-2	2310	1676	2752	1430	2280	2830	2079	2196.61	1719.22	2028.92	1999.36	2092.08	2087.35	1156.81
chr1	232900785	232902386	708.796	-0.0134435	0.0914797	-0.146957	0.883166	0.95577	FALSE	FALSE	inactive	'1-2	664	623	903	444	617	801	1287	631.407	639.064	665.74	620.779	566.145	590.801	716.118
chr1	233813593	233813850	250.071	0.221128	0.197268	1.12095	0.26231	0.599835	FALSE	FALSE	inactive	'1-2	88	81	141	96	94	144	283	83.6804	83.0886	103.953	134.223	86.2523	106.211	157.468
chr1	234191652	234192152	164.105	-0.140121	0.242063	-0.578863	0.562681	0.812148	TRUE	TRUE	not-induced	'1-2	144	69	151	86	88	147	149	136.932	70.7791	111.325	120.241	80.7468	108.424	82.9072
chr1	239867588	239868032	51.5167	-0.00194584	0.215214	-0.0090414	0.992786	0.998442	FALSE	FALSE	inactive	'1-2	68	68	82	48	67	70	127	64.6621	69.7534	60.4548	67.1113	61.4777	51.6306	70.6659
chr1	239882286	239883081	728.208	-0.141053	0.190667	-0.739788	0.459429	0.753702	FALSE	FALSE	inactive	'1-2	409	365	590	284	435	461	1091	388.924	374.411	434.979	397.075	399.146	340.024	607.059
chr1	240042546	240043046	407.333	-0.180789	0.0974295	-1.85559	0.0635123	0.289112	TRUE	TRUE	not-induced	'1-2	606	507	748	335	576	640	522	576.254	520.073	551.465	468.381	528.525	472.051	290.454
chr1	243611301	243611801	271.637	-0.0872014	0.123692	-0.704986	0.480819	0.765787	FALSE	FALSE	inactive	'1-2	331	290	460	230	314	371	654	314.752	297.478	339.137	321.575	288.119	273.642	363.902
chr1	249200332	249200832	4575.46	-0.000815109	0.136529	-0.00597024	0.995236	0.999074	TRUE	TRUE	not-induced	'1-2	3247	3191	4564	2350	3997	4818	3934	3087.62	3273.28	3364.82	3285.66	3667.56	3553.66	2188.97
chr10	152879	153379	17.0255	-0.0627179	0.344386	-0.182115	0.855492	0.944892	FALSE	FALSE	inactive	'1-2	21	15	22	16	21	22	55	19.9692	15.3868	16.2196	22.3704	19.2691	16.2267	30.6033
chr10	502333	502833	1815.23	-0.081047	0.10943	-0.74063	0.458918	0.753481	TRUE	TRUE	not-induced	'1-2	2214	1848	2515	1298	2152	2571	3220	2105.32	1895.65	1854.19	1814.8	1974.63	1896.32	1791.69
chr10	664114	664614	827.292	-0.0503739	0.116904	-0.430899	0.666542	0.862652	TRUE	TRUE	not-induced	'1-2	564	511	679	361	557	634	867	536.315	524.176	500.595	504.733	511.091	467.625	482.42
chr10	4414729	4415229	194.682	-0.0388477	0.166382	-0.233485	0.815385	0.926347	FALSE	FALSE	inactive	'1-2	219	181	235	122	190	248	501	208.25	185.667	173.255	170.574	174.34	182.92	278.769
chr10	5757699	5758199	31.3929	0.319587	0.287451	1.1118	0.266225	0.602334	FALSE	FALSE	inactive	'1-2	34	46	43	30	33	41	99	32.3311	47.1861	31.7019	41.9445	30.2801	30.2408	55.086
chr10	9929063	9929563	260.435	-0.0416882	0.132517	-0.314589	0.753074	0.900439	FALSE	FALSE	inactive	'1-2	303	279	386	202	371	427	1087	288.127	286.194	284.58	282.427	340.421	314.946	604.833
chr10	14634045	14634545	260.435	-0.197362	0.166435	-1.18582	0.235695	0.570615	TRUE	FALSE	not-induced	'1-2	317	278	471	194	433	477	594	301.44	285.168	347.246	271.241	397.311	351.825	330.516
chr10	19236988	19237488	67.1654	0.140216	0.282715	0.495961	0.619922	0.839499	FALSE	FALSE	inactive	'1-2	66	107	102	48	79	76	236	62.7603	109.759	75.1998	67.1113	72.4886	56.056	131.316
chr10	19443333	19443833	48.3147	-0.265799	0.246966	-1.07626	0.281813	0.620068	FALSE	FALSE	inactive	'1-2	58	45	74	30	45	52	145	55.153	46.1603	54.5567	41.9445	41.291	38.3541	80.6815
chr10	22481614	22482114	159.072	0.0137444	0.163315	0.0841587	0.93293	0.975429	TRUE	TRUE	not-induced	'1-2	235	191	306	177	181	249	311	223.465	195.925	225.6	247.473	166.082	183.657	173.048
chr10	22757388	22757888	73.6408	0.232852	0.176366	1.32028	0.186741	0.516183	FALSE	FALSE	inactive	'1-2	84	86	112	72	73	114	184	79.8767	88.2175	82.5724	100.667	66.9831	84.0841	102.382
chr10	23949096	23949596	766.015	-0.112812	0.096671	-1.16697	0.243224	0.578967	FALSE	FALSE	inactive	'1-2	783	795	1224	525	931	1036	1543	744.565	815.499	902.398	734.03	854.265	764.132	858.563
chr10	30097588	30098185	517.261	0.162958	0.149526	1.08983	0.275789	0.61454	FALSE	TRUE	not-induced	'1-2	396	385	624	347	404	643	762	376.562	394.927	460.046	485.159	370.701	474.264	423.995
chr10	30848051	30848551	20.8666	0.111564	0.334288	0.333735	0.73858	0.893563	FALSE	FALSE	inactive	'1-2	23	18	30	13	18	37	68	21.871	18.4641	22.1176	18.176	16.5164	27.2904	37.8369
chr10	32343054	32343554	176.626	-0.0494487	0.174497	-0.283378	0.776887	0.910401	FALSE	FALSE	inactive	'1-2	126	163	197	77	179	186	346	119.815	167.203	145.239	107.658	164.246	137.19	192.523
chr10	43817978	43818478	810.113	-0.177472	0.126976	-1.39769	0.162207	0.478672	TRUE	TRUE	not-induced	'1-2	1163	906	1434	704	1293	1418	1398	1105.91	929.361	1057.22	984.299	1186.43	1045.89	777.881
chr10	44114808	44115308	187.344	-0.0992382	0.15306	-0.648361	0.516751	0.788559	FALSE	FALSE	inactive	'1-2	199	164	201	113	169	183	633	189.232	168.229	148.188	157.991	155.071	134.977	352.217
chr10	44349504	44350004	4969.85	-0.259934	0.180592	-1.43935	0.150052	0.462698	TRUE	TRUE	not-induced	'1-2	7425	5690	9981	4507	10307	10573	642	7060.53	5836.71	7358.52	6301.47	9457.47	7798.43	357.225
chr10	45359508	45360008	694.97	-0.0545768	0.101959	-0.535281	0.592456	0.825412	TRUE	TRUE	not-induced	'1-2	988	849	1090	549	870	1091	1315	939.503	870.891	803.606	767.585	798.292	804.699	731.698
chr10	45606849	45607349	128.619	-0.140554	0.213121	-0.659505	0.509571	0.785412	FALSE	FALSE	inactive	'1-2	105	96	148	70	114	121	728	99.8459	98.4753	109.113	97.8706	104.604	89.2471	405.077
chr10	46167945	46168464	4360.55	0.27056	0.207366	1.30475	0.191979	0.522479	FALSE	TRUE	not-induced	'1-2	2849	4535	5140	2034	3731	6060	6637	2709.15	4651.93	3789.48	2843.84	3423.48	4469.73	3692.99
chr10	48572058	48572558	360.952	-0.0371777	0.139597	-0.266321	0.789992	0.917614	TRUE	TRUE	not-induced	'1-2	548	420	629	335	571	767	507	521.101	430.83	463.732	468.381	523.937	565.723	282.107
chr10	61931345	61931683	80.6118	-0.735634	0.17507	-4.20195	2.64623e-05	0.000314273	TRUE	TRUE	not-induced	'1-2	123	56	169	52	116	106	102	116.962	57.4439	124.596	72.7039	106.439	78.1834	56.7553
chr10	62233306	62233806	1921.27	-0.402789	0.202868	-1.98548	0.0470914	0.238526	TRUE	TRUE	not-induced	'1-2	5502	3201	5926	2647	4898	4985	444	5231.93	3283.54	4368.96	3700.91	4494.29	3676.83	247.052
chr10	62924198	62924698	1049.37	-0.0649193	0.108064	-0.600749	0.548007	0.806168	FALSE	FALSE	inactive	'1-2	1086	932	1249	595	1016	1307	2248	1032.69	956.031	920.829	831.9	932.259	964.016	1250.84
chr10	65389167	65391077	8980.87	0.476128	0.0635168	7.4961	6.57431e-14	1.58526e-12	TRUE	TRUE	not-induced	'1-2	5485	7142	7118	5510	5732	9293	6913	5215.76	7326.15	5247.77	7703.81	5259.55	6854.33	3846.56
chr10	70571329	70571829	637.827	-0.0331349	0.147513	-0.224623	0.822273	0.929171	FALSE	FALSE	inactive	'1-2	749	663	999	557	864	994	1383	712.234	680.095	736.516	778.77	792.787	733.154	769.535
chr10	70973404	70973904	595.142	0.22668	0.143865	1.57564	0.115108	0.404804	FALSE	TRUE	not-induced	'1-2	797	857	875	532	686	1022	1374	757.878	879.097	645.097	743.817	629.458	753.806	764.527
chr10	74023429	74023929	254.029	-0.101197	0.142063	-0.71234	0.476254	0.763277	FALSE	FALSE	inactive	'1-2	289	241	400	199	315	374	663	274.814	247.214	294.901	278.232	289.037	275.855	368.909
chr10	74096783	74097283	695.602	-0.0686325	0.07893	-0.869536	0.384554	0.706462	FALSE	FALSE	inactive	'1-2	803	760	1092	499	845	1022	1648	763.584	779.596	805.081	697.678	775.353	753.806	916.988
chr10	75631679	75632179	809.493	-0.196948	0.0913731	-2.15542	0.0311288	0.177547	FALSE	FALSE	inactive	'1-2	763	619	955	452	778	820	1788	725.547	634.961	704.077	631.964	713.875	604.815	994.887
chr10	76346840	76347340	179.358	-0.0457077	0.162996	-0.280423	0.779153	0.911391	FALSE	FALSE	inactive	'1-2	224	206	250	149	208	209	532	213.005	211.312	184.313	208.325	190.856	154.154	296.018
chr10	79079275	79079775	318.016	-0.110043	0.111071	-0.990738	0.321813	0.656435	FALSE	FALSE	inactive	'1-2	370	316	475	209	393	489	947	351.838	324.148	350.195	292.214	360.608	360.676	526.934
chr10	79173707	79174207	542.403	-0.105996	0.114028	-0.929554	0.352602	0.68162	FALSE	FALSE	inactive	'1-2	544	516	692	351	614	623	1054	517.297	529.305	510.179	490.751	563.393	459.512	586.471
chr10	79750575	79751075	198.985	-0.0770867	0.125523	-0.614122	0.539135	0.800381	FALSE	FALSE	inactive	'1-2	194	173	241	125	232	257	403	184.477	177.461	177.678	174.769	212.878	189.558	224.239
chr10	80185856	80186356	91.8408	-0.0239466	0.234378	-0.102171	0.918621	0.968661	FALSE	FALSE	inactive	'1-2	96	84	93	49	73	92	406	91.2877	86.1659	68.5646	68.5094	66.9831	67.8573	225.908
chr10	80845758	80846258	369.74	-0.312373	0.136573	-2.28723	0.0221825	0.137549	FALSE	FALSE	inactive	'1-2	425	352	605	260	531	479	1000	404.138	361.076	446.038	363.519	487.234	353.301	556.424
chr10	80891425	80891925	543.793	0.0183871	0.111559	0.164819	0.869086	0.951621	FALSE	FALSE	inactive	'1-2	525	489	685	341	537	724	1037	499.23	501.609	505.018	476.77	492.739	534.008	577.012
chr10	81206483	81206983	1418.91	-0.136261	0.0920124	-1.48089	0.138635	0.445145	TRUE	FALSE	not-induced	'1-2	1452	1135	1636	911	1494	1580	2219	1380.73	1164.27	1206.15	1273.72	1370.86	1165.38	1234.71
chr10	82137958	82138458	115.324	0.00831725	0.163247	0.0509489	0.959366	0.986205	FALSE	FALSE	inactive	'1-2	119	124	157	83	121	137	302	113.159	127.197	115.749	116.047	111.027	101.048	168.04
chr10	88301366	88301866	314.873	-0.1855	0.103444	-1.79324	0.0729351	0.312153	FALSE	FALSE	inactive	'1-2	387	308	427	203	386	416	769	368.004	315.942	314.807	283.825	354.185	306.833	427.89
chr10	100709047	100709451	104.803	-0.252252	0.201354	-1.25278	0.210285	0.543677	FALSE	FALSE	inactive	'1-2	108	68	158	76	103	122	252	102.699	69.7534	116.486	106.26	94.5105	89.9847	140.219
chr10	101153975	101155103	1148.07	-0.0675186	0.0951625	-0.709508	0.478009	0.764085	FALSE	FALSE	inactive	'1-2	1133	968	1465	740	1144	1401	2483	1077.39	992.96	1080.08	1034.63	1049.71	1033.35	1381.6
chr10	101210575	101211075	512.708	-0.167011	0.117175	-1.4253	0.15407	0.467836	FALSE	FALSE	inactive	'1-2	775	569	854	415	676	818	1312	736.958	583.671	629.614	580.233	620.282	603.34	730.029
chr10	101756985	101757324	68.3685	-0.490255	0.260342	-1.88312	0.0596842	0.278624	FALSE	FALSE	inactive	'1-2	76	48	66	29	57	46	200	72.2694	49.2377	48.6587	40.5464	52.3019	33.9287	111.285
chr10	102616632	102617132	622.087	-0.108392	0.138541	-0.782385	0.433988	0.736955	FALSE	FALSE	inactive	'1-2	762	654	961	478	823	935	2101	724.596	670.863	708.5	668.316	755.166	689.637	1169.05
chr10	102884113	102884584	1307.97	0.859846	0.112978	7.61076	2.72497e-14	6.82388e-13	TRUE	TRUE	not-induced	'1-2	1078	1897	1372	1368	1045	2148	1635	1025.08	1945.91	1011.51	1912.67	958.868	1584.32	909.754
chr10	103376150	103376650	1627.83	-0.227043	0.0889795	-2.55164	0.0107218	0.0768092	FALSE	FALSE	inactive	'1-2	1605	1305	2024	932	1572	1593	3325	1526.22	1338.65	1492.2	1303.08	1442.43	1174.96	1850.11
chr10	105651927	105652427	66.2921	0.164499	0.208102	0.790473	0.429252	0.73525	FALSE	FALSE	inactive	'1-2	50	74	84	39	56	70	152	47.5457	75.9081	61.9293	54.5279	51.3843	51.6306	84.5765
chr10	105991816	105992439	4581.36	-0.0853986	0.108559	-0.786655	0.431484	0.736929	TRUE	TRUE	not-induced	'1-2	4629	3716	5737	3089	4899	5751	7209	4401.78	3811.82	4229.62	4318.89	4495.21	4241.82	4011.26
chr10	106139434	106140089	251.317	-0.0415698	0.165616	-0.251	0.801814	0.921277	FALSE	FALSE	inactive	'1-2	228	209	284	153	203	231	861	216.808	214.389	209.38	213.917	186.268	170.381	479.081
chr10	106570940	106571440	445.065	-0.176159	0.0978045	-1.80113	0.0716816	0.30973	FALSE	FALSE	inactive	'1-2	613	481	750	335	545	657	1213	582.91	493.402	552.94	468.381	500.08	484.59	674.943
chr10	112862034	112863479	1175.86	-0.16484	0.0787175	-2.09408	0.0362532	0.198462	TRUE	FALSE	not-induced	'1-2	1444	1142	1624	769	1294	1493	2170	1373.12	1171.45	1197.3	1075.18	1187.35	1101.21	1207.44
chr10	116259425	116259925	512.977	-0.133999	0.122774	-1.09143	0.275086	0.613451	FALSE	FALSE	inactive	'1-2	349	349	559	243	436	469	755	331.869	357.999	412.125	339.751	400.064	345.925	420.1
chr10	116475133	116475633	79.2539	0.00888137	0.205131	0.0432961	0.965465	0.988816	FALSE	FALSE	inactive	'1-2	81	80	91	54	82	87	198	77.024	82.0628	67.09	75.5002	75.2413	64.1694	110.172
chr10	117661454	117661954	177.301	-0.111356	0.159314	-0.698975	0.484568	0.768334	FALSE	FALSE	inactive	'1-2	203	197	253	123	220	223	388	193.035	202.08	186.525	171.973	201.867	164.48	215.893
chr10	118667105	118667419	93.53	0.227122	0.182162	1.24682	0.212465	0.546114	FALSE	FALSE	inactive	'1-2	80	93	123	93	105	120	201	76.0731	95.398	90.6822	130.028	96.3456	88.5095	111.841
chr10	119876309	119877266	920.45	0.0418878	0.183906	0.227767	0.819827	0.928164	FALSE	TRUE	not-induced	'1-2	652	641	861	443	648	850	1126	619.996	657.528	634.775	619.381	594.59	626.943	626.534
chr10	120788700	120790508	2602.7	0.179472	0.364505	0.492373	0.622456	0.840463	FALSE	TRUE	not-induced	'1-2	1973	3021	3974	1401	2827	4503	5004	1876.15	3098.9	2929.84	1958.81	2593.99	3321.32	2784.35
chr10	121447523	121449073	824.683	0.991505	0.157153	6.30918	2.80521e-10	5.05823e-09	TRUE	TRUE	not-induced	'1-2	603	1178	741	805	703	1590	684	573.401	1208.37	546.305	1125.51	645.057	1172.75	380.594
chr10	122345779	122346446	1084.82	-0.108849	0.149126	-0.729915	0.465442	0.757065	FALSE	FALSE	inactive	'1-2	1353	1140	1659	813	1486	1739	2471	1286.59	1169.39	1223.1	1136.7	1363.52	1282.65	1374.92
chr10	122792722	122793515	244.323	-0.13901	0.147825	-0.94037	0.347028	0.676826	FALSE	FALSE	inactive	'1-2	324	307	395	169	288	316	579	308.096	314.916	291.215	236.288	264.262	233.075	322.17
chr10	123338400	123340883	2429.55	-0.118485	0.0914859	-1.29512	0.195278	0.526211	TRUE	FALSE	not-induced	'1-2	1935	1542	2400	1246	2012	2308	3133	1840.02	1581.76	1769.41	1742.1	1846.17	1702.33	1743.28
chr10	123911958	123912458	754.796	-0.0907563	0.110961	-0.81791	0.413408	0.727023	FALSE	FALSE	inactive	'1-2	861	797	1118	547	996	1106	1629	818.737	817.55	824.249	764.789	913.907	815.763	906.415
chr10	124561798	124562298	977.248	-0.0766843	0.0677304	-1.1322	0.257551	0.595234	FALSE	FALSE	inactive	'1-2	1186	1066	1562	755	1236	1472	2335	1127.78	1093.49	1151.59	1055.6	1134.13	1085.72	1299.25
chr10	126213531	126214382	6595.95	-0.00743793	0.125064	-0.0594731	0.952575	0.983961	TRUE	TRUE	not-induced	'1-2	4556	4217	5932	3105	4860	6006	5214	4332.36	4325.73	4373.39	4341.26	4459.43	4429.9	2901.2
chr10	127379732	127380229	708.336	-0.10077	0.162863	-0.618738	0.536089	0.798264	FALSE	FALSE	inactive	'1-2	588	503	768	370	620	740	1486	559.137	515.97	566.211	517.316	568.898	545.809	826.847
chr10	128559361	128559861	864.003	-0.0248341	0.108609	-0.228657	0.819136	0.927916	TRUE	TRUE	not-induced	'1-2	904	874	1041	526	905	1057	1295	859.626	896.536	767.481	735.428	830.408	779.622	720.57
chr10	129160977	129161477	190.737	-0.0246568	0.174652	-0.141177	0.88773	0.958336	FALSE	FALSE	inactive	'1-2	172	130	185	115	154	191	1355	163.557	133.352	136.392	160.787	141.307	140.878	753.955
chr10	130008433	130008933	1692.73	-0.103117	0.099639	-1.03491	0.300711	0.637774	TRUE	TRUE	not-induced	'1-2	1640	1323	2058	930	1571	2090	2504	1559.5	1357.11	1517.27	1300.28	1441.51	1541.54	1393.29
chr10	134320233	134320547	317.029	-0.0499503	0.127904	-0.39053	0.696145	0.874554	TRUE	FALSE	not-induced	'1-2	331	347	412	212	374	376	565	314.752	355.947	303.748	296.408	343.174	277.33	314.38
chr10	134327649	134328149	176.749	-0.0369741	0.223262	-0.165609	0.868465	0.951621	FALSE	FALSE	inactive	'1-2	155	105	140	73	133	202	1178	147.392	107.707	103.215	102.065	122.038	148.991	655.468
chr11	232608	233108	1519.45	-0.133202	0.114578	-1.16254	0.245016	0.581384	TRUE	TRUE	not-induced	'1-2	1382	1081	1771	832	1332	1667	1886	1314.16	1108.87	1305.68	1163.26	1222.21	1229.55	1049.42
chr11	364368	364868	12375	-0.152383	0.129465	-1.17702	0.239187	0.574716	TRUE	TRUE	not-induced	'1-2	10132	7335	11595	6396	10321	11410	9240	9634.66	7524.13	8548.45	8942.58	9470.32	8415.78	5141.36
chr11	795283	795783	1771.38	-0.0297883	0.0832795	-0.357691	0.720575	0.886058	FALSE	FALSE	inactive	'1-2	1383	1305	1912	1029	1589	1798	2581	1315.11	1338.65	1409.63	1438.7	1458.03	1326.17	1436.13
chr11	849083	849583	4344.68	-0.00519365	0.0645214	-0.0804951	0.935844	0.976327	TRUE	TRUE	not-induced	'1-2	4826	4472	6492	3267	5376	6902	5495	4589.11	4587.31	4786.25	4567.76	4932.9	5090.77	3057.55
chr11	1325583	1326083	1592.53	-0.0559415	0.0676103	-0.827411	0.408004	0.722841	TRUE	TRUE	not-induced	'1-2	2016	1623	2318	1321	1981	2343	2848	1917.04	1664.85	1708.95	1846.96	1817.72	1728.15	1584.7
chr11	1884717	1885217	6569.58	-0.152193	0.0794457	-1.91569	0.0554052	0.265585	TRUE	TRUE	not-induced	'1-2	5168	4096	6983	3309	5370	6321	5854	4914.32	4201.61	5148.24	4626.48	4927.39	4662.24	3257.31
chr11	2229620	2230617	6144.92	-0.14458	0.0941096	-1.53629	0.124467	0.423146	TRUE	TRUE	not-induced	'1-2	6871	5581	8425	4114	6614	7517	8589	6533.73	5724.9	6211.36	5752	6068.86	5544.39	4779.13
chr11	2954633	2955133	2438.84	-0.0785879	0.0809979	-0.970246	0.331924	0.664917	TRUE	TRUE	not-induced	'1-2	2208	1900	2976	1446	2488	3051	3227	2099.62	1948.99	2194.07	2021.73	2282.93	2250.36	1795.58
chr11	3009133	3009633	321.714	-0.00705596	0.112188	-0.0628942	0.949851	0.9826	FALSE	FALSE	inactive	'1-2	354	309	465	201	324	496	812	336.623	316.967	342.823	281.028	297.295	365.839	451.817
chr11	3013041	3013374	845.716	0.33481	0.414361	0.808016	0.419082	0.729452	TRUE	TRUE	not-induced	'1-2	241	401	464	215	375	599	406	229.17	411.34	342.086	300.603	344.092	441.81	225.908
chr11	3168431	3168800	6068.95	0.146149	0.148296	0.985527	0.324366	0.659152	TRUE	TRUE	not-induced	'1-2	3242	3204	3897	2524	3076	3935	3343	3082.86	3286.61	2873.08	3528.93	2822.47	2902.38	1860.13
chr11	3635823	3636323	1212.35	-0.108904	0.0899057	-1.21131	0.225775	0.560869	TRUE	FALSE	not-induced	'1-2	1681	1319	2049	1007	1666	2080	2687	1598.49	1353.01	1510.63	1407.94	1528.68	1534.17	1495.11
chr11	3718017	3718517	315.654	0.0135351	0.121472	0.111426	0.911279	0.966072	FALSE	FALSE	inactive	'1-2	334	278	380	209	351	467	1024	317.605	285.168	280.156	292.214	322.07	344.45	569.779
chr11	10086655	10087155	118.979	0.0336432	0.13905	0.241951	0.808818	0.92388	FALSE	FALSE	inactive	'1-2	142	132	191	113	156	188	515	135.03	135.404	140.815	157.991	143.142	138.665	286.559
chr11	12065572	12065975	2675.37	-0.174438	0.343501	-0.507824	0.611576	0.835157	TRUE	TRUE	not-induced	'1-2	2570	1975	3686	1908	4320	4598	431	2443.85	2025.92	2717.52	2667.67	3963.93	3391.39	239.819
chr11	12790240	12790600	296.941	-0.0662942	0.13993	-0.473766	0.635667	0.8469	FALSE	FALSE	inactive	'1-2	299	277	419	211	299	344	708	284.323	284.142	308.909	295.01	274.356	253.727	393.949
chr11	13813888	13814388	32.1398	-0.666728	0.331137	-2.01345	0.0440673	0.227562	FALSE	FALSE	inactive	'1-2	57	16	47	17	36	47	105	54.2021	16.4126	34.6509	23.7686	33.0328	34.6662	58.4246
chr11	13976147	13976647	255.934	0.000885306	0.13807	0.00641203	0.994884	0.999006	FALSE	FALSE	inactive	'1-2	319	286	393	174	298	439	735	303.341	293.374	289.741	243.278	273.438	323.797	408.972
chr11	16313971	16314471	420.146	-0.0507785	0.118284	-0.429293	0.66771	0.86341	FALSE	FALSE	inactive	'1-2	497	431	559	313	513	580	880	472.604	442.113	412.125	437.621	470.717	427.796	489.654
chr11	17452651	17453006	533.629	-0.106928	0.136716	-0.782117	0.434146	0.736955	FALSE	FALSE	inactive	'1-2	574	440	719	447	611	612	1081	545.824	451.345	530.085	624.974	560.64	451.399	601.495
chr11	18245515	18246015	289.991	-0.137029	0.152725	-0.897225	0.369599	0.695472	FALSE	FALSE	inactive	'1-2	256	220	359	182	247	263	774	243.434	225.673	264.674	254.464	226.642	193.983	430.673
chr11	30460114	30460614	143.926	-0.0994972	0.152333	-0.653155	0.513656	0.786631	FALSE	FALSE	inactive	'1-2	185	131	224	111	140	203	490	175.919	134.378	165.145	155.195	128.461	149.729	272.648
chr11	33711729	33713064	891.618	-0.0659636	0.104412	-0.631763	0.527542	0.793868	TRUE	TRUE	not-induced	'1-2	1184	922	1664	861	1319	1700	1478	1125.88	945.773	1226.79	1203.81	1210.28	1253.89	822.395
chr11	34621784	34622719	659.489	-0.146615	0.0905465	-1.61922	0.105399	0.386594	FALSE	FALSE	inactive	'1-2	564	516	837	382	615	671	1316	536.315	529.305	617.081	534.094	564.31	494.916	732.255
chr11	34847134	34847899	826.056	-0.169012	0.0876098	-1.92915	0.0537125	0.260263	FALSE	FALSE	inactive	'1-2	763	697	1031	439	832	905	1901	725.547	714.972	760.108	613.788	763.424	667.509	1057.76
chr11	57312115	57312615	170.644	-0.0195499	0.163673	-0.119445	0.904923	0.964317	FALSE	FALSE	inactive	'1-2	205	172	243	123	220	292	562	194.937	176.435	179.153	171.973	201.867	215.373	312.711
chr11	60681127	60681460	425.529	0.0465097	0.138912	0.334813	0.737766	0.89333	FALSE	FALSE	inactive	'1-2	249	219	308	162	230	331	455	236.777	224.647	227.074	226.501	211.043	244.139	253.173
chr11	60795864	60796364	606.06	-0.104566	0.133732	-0.78191	0.434267	0.736955	FALSE	FALSE	inactive	'1-2	721	643	926	443	811	926	1752	685.609	659.58	682.697	619.381	744.155	682.999	974.856
chr11	61374797	61375297	266.794	-0.0348969	0.107736	-0.323911	0.746005	0.897049	FALSE	FALSE	inactive	'1-2	336	275	423	244	364	435	727	319.507	282.091	311.858	341.149	333.998	320.847	404.521
chr11	62521000	62522061	4017.62	-0.0470022	0.131056	-0.358641	0.719864	0.885905	TRUE	TRUE	not-induced	'1-2	4219	3558	5631	3006	4421	5393	5805	4011.9	3649.74	4151.47	4202.84	4056.61	3977.77	3230.04
chr11	64145977	64146477	1297.76	-0.103764	0.0908929	-1.14161	0.253618	0.590204	TRUE	TRUE	not-induced	'1-2	1586	1260	1811	970	1416	1642	2093	1508.15	1292.49	1335.17	1356.21	1299.29	1211.11	1164.6
chr11	64274200	64274759	660.839	0.555065	0.0833049	6.66305	2.68197e-11	5.23899e-10	TRUE	TRUE	not-induced	'1-2	718	940	831	716	750	1286	1140	682.756	964.238	612.657	1001.08	688.183	948.527	634.324
chr11	64387201	64388379	2075.96	-0.048679	0.124221	-0.391873	0.695152	0.873844	TRUE	FALSE	not-induced	'1-2	1361	1195	1632	855	1415	1690	2199	1294.19	1225.81	1203.2	1195.42	1298.37	1246.51	1223.58
chr11	64624115	64624514	1180.71	-0.0973472	0.103982	-0.936191	0.349175	0.678285	TRUE	TRUE	not-induced	'1-2	1242	1093	1677	859	1555	1720	1279	1181.03	1121.18	1236.37	1201.01	1426.83	1268.64	711.667
chr11	65625556	65625903	2051.82	-0.0888885	0.178822	-0.497077	0.619135	0.838989	TRUE	TRUE	not-induced	'1-2	1779	1326	2194	1073	1881	2536	1089	1691.68	1360.19	1617.53	1500.22	1725.96	1870.5	605.946
chr11	66056242	66057092	28137.9	0.00637318	0.121818	0.0523172	0.958276	0.985892	TRUE	TRUE	not-induced	'1-2	22550	19808	27911	15237	22328	28692	14140	21443.1	20318.7	20577.5	21303.6	20487.7	21162.6	7867.84
chr11	66674362	66674862	443.166	-0.174677	0.102973	-1.69635	0.0898202	0.35402	FALSE	FALSE	inactive	'1-2	478	372	598	272	483	569	826	454.537	381.592	440.877	380.297	443.19	419.683	459.607
chr11	67121161	67122466	2732.77	-0.030479	0.0685595	-0.444563	0.656635	0.856714	TRUE	TRUE	not-induced	'1-2	2966	2607	3773	2065	3042	3612	3696	2820.41	2674.22	2781.66	2887.18	2791.27	2664.14	2056.54
chr11	67797998	67798498	3710.94	-0.147715	0.0784937	-1.88187	0.0598535	0.27905	TRUE	TRUE	not-induced	'1-2	2661	2180	3335	1730	2925	3084	4121	2530.38	2236.21	2458.74	2418.8	2683.91	2274.7	2293.03
chr11	67976683	67977183	399.593	-0.0910627	0.0988235	-0.921469	0.356806	0.684535	FALSE	FALSE	inactive	'1-2	582	475	764	399	585	694	1587	553.432	487.248	563.262	557.862	536.783	511.88	883.046
chr11	68987945	68988330	1325.87	-0.0763292	0.0949731	-0.803693	0.421574	0.730501	TRUE	TRUE	not-induced	'1-2	960	942	1317	651	1104	1184	1466	912.877	966.289	970.963	910.197	1013.01	873.294	815.718
chr11	69418792	69419292	257.376	-0.114004	0.109237	-1.04363	0.296655	0.633927	TRUE	TRUE	not-induced	'1-2	303	246	400	208	314	360	480	288.127	252.343	294.901	290.816	288.119	265.529	267.084
chr11	69461520	69462320	3416.86	-0.112285	0.0834055	-1.34626	0.178219	0.503526	TRUE	TRUE	not-induced	'1-2	3340	2857	4228	1996	3090	3695	4301	3176.05	2930.67	3117.11	2790.71	2835.31	2725.36	2393.18
chr11	69950408	69950804	3048.55	-0.0440862	0.115645	-0.381222	0.703039	0.877672	TRUE	TRUE	not-induced	'1-2	732	655	879	451	730	880	1065	696.069	671.889	648.046	630.566	669.831	649.07	592.592
chr11	72316985	72317485	869.532	-0.0448844	0.0984646	-0.455843	0.648503	0.85326	FALSE	FALSE	inactive	'1-2	854	847	1138	557	841	957	1828	812.08	868.84	838.994	778.77	771.683	705.864	1017.14
chr11	73471139	73471639	4604.92	-0.115446	0.115114	-1.00289	0.315916	0.651352	TRUE	TRUE	not-induced	'1-2	5493	4612	6996	3399	5471	6418	7748	5223.37	4730.92	5157.82	4752.32	5020.07	4733.79	4311.18
chr11	74347372	74347872	57.6615	-0.0937924	0.208962	-0.44885	0.65354	0.854905	FALSE	FALSE	inactive	'1-2	58	58	72	32	64	69	117	55.153	59.4955	53.0822	44.7408	58.725	50.893	65.1017
chr11	74880187	74880687	1269.22	-0.203368	0.0776024	-2.62064	0.00877661	0.0647102	FALSE	FALSE	inactive	'1-2	1575	1164	1845	920	1503	1631	2799	1497.69	1194.01	1360.23	1286.3	1379.12	1202.99	1557.43
chr11	75044645	75045943	1953.56	0.328337	0.0791169	4.15002	3.32442e-05	0.00039221	FALSE	TRUE	not-induced	'1-2	1935	2548	2648	1724	2119	2964	3771	1840.02	2613.7	1952.25	2410.41	1944.35	2186.19	2098.28
chr11	75139239	75139565	558.609	-0.106442	0.107914	-0.986352	0.323961	0.658466	TRUE	TRUE	not-induced	'1-2	741	718	905	430	854	894	1190	704.627	736.513	667.214	601.205	783.611	659.396	662.145
chr11	78127848	78128265	2683.55	-0.0920285	0.0645383	-1.42595	0.153882	0.467399	TRUE	TRUE	not-induced	'1-2	3193	2774	4162	2050	3274	3845	4005	3036.27	2845.53	3068.45	2866.21	3004.15	2835.99	2228.48
chr11	78204008	78204389	41.9645	-0.128802	0.270272	-0.476565	0.633672	0.845742	FALSE	FALSE	inactive	'1-2	28	46	53	24	63	44	108	26.6256	47.1861	39.0744	33.5556	57.8074	32.4535	60.0938
chr11	84028101	84028601	383.318	-0.097591	0.100019	-0.975728	0.329199	0.662243	FALSE	FALSE	inactive	'1-2	408	423	643	281	510	564	799	387.973	433.907	474.054	392.881	467.964	415.995	444.583
chr11	84384736	84385236	44.3457	-0.34202	0.266232	-1.28467	0.198909	0.530139	FALSE	FALSE	inactive	'1-2	61	33	75	25	77	97	169	58.0057	33.8509	55.294	34.9538	70.6535	71.5452	94.0357
chr11	86175376	86175807	164.268	-0.0646522	0.149683	-0.431926	0.665795	0.862483	FALSE	FALSE	inactive	'1-2	133	141	183	99	174	165	268	126.472	144.636	134.917	138.417	159.658	121.701	149.122
chr11	87311872	87312372	171.658	0.0709863	0.140016	0.506986	0.612165	0.835343	FALSE	FALSE	inactive	'1-2	176	173	254	122	167	251	366	167.361	177.461	187.262	170.574	153.235	185.132	203.651
chr11	92949780	92950549	353.977	0.00933411	0.11084	0.0842121	0.932888	0.975429	FALSE	FALSE	inactive	'1-2	303	261	355	184	275	378	839	288.127	267.73	261.725	257.26	252.334	278.805	466.84
chr11	93517558	93518058	5357.26	-0.0756273	0.0765829	-0.987522	0.323387	0.657862	TRUE	TRUE	not-induced	'1-2	4051	3522	5374	2742	4052	4752	3993	3852.15	3612.81	3962	3833.73	3718.02	3504.98	2221.8
chr11	95800989	95801489	24.3855	-0.278347	0.300015	-0.927777	0.353523	0.68225	FALSE	FALSE	inactive	'1-2	25	18	38	14	27	33	72	23.7728	18.4641	28.0156	19.5741	24.7746	24.3401	40.0626
chr11	100851563	100852234	301.452	-0.177941	0.130072	-1.36802	0.171307	0.491871	FALSE	FALSE	inactive	'1-2	388	323	464	229	442	452	715	368.954	331.328	342.086	320.177	405.569	333.386	397.843
chr11	101278079	101278564	137.92	0.26561	0.215521	1.23241	0.217796	0.551979	FALSE	FALSE	inactive	'1-2	101	141	122	79	109	122	207	96.0423	144.636	89.9449	110.454	100.016	89.9847	115.18
chr11	103925497	103926229	380.37	0.171635	0.11423	1.50254	0.132959	0.436249	FALSE	FALSE	inactive	'1-2	426	439	480	325	407	509	992	405.089	450.319	353.882	454.399	373.454	375.428	551.973
chr11	107879383	107879883	4042.02	-0.0782017	0.0935696	-0.835759	0.40329	0.719931	TRUE	TRUE	not-induced	'1-2	2661	2125	3424	1856	2845	3374	2340	2530.38	2179.79	2524.36	2594.97	2610.51	2488.59	1302.03
chr11	107991953	107992748	4963.83	-0.158775	0.0716418	-2.21623	0.0266759	0.159132	TRUE	TRUE	not-induced	'1-2	5852	4821	7560	3504	6040	6907	6133	5564.75	4945.31	5573.63	4899.12	5542.17	5094.46	3412.55
chr11	110166313	110166912	2940.74	0.0210244	0.1504	0.13979	0.888826	0.958532	TRUE	TRUE	not-induced	'1-2	964	1016	1453	590	1054	1527	1236	916.681	1042.2	1071.23	824.909	967.127	1126.28	687.741
chr11	115585896	115586355	195.832	0.024644	0.151221	0.162966	0.870545	0.951621	FALSE	FALSE	inactive	'1-2	248	273	328	154	225	274	521	235.827	280.039	241.819	215.315	206.455	202.097	289.897
chr11	115595397	115595897	660.11	-0.204459	0.123592	-1.6543	0.0980667	0.37174	TRUE	TRUE	not-induced	'1-2	1196	879	1477	750	1460	1547	973	1137.29	901.665	1088.92	1048.61	1339.66	1141.04	541.401
chr11	116479097	116479597	683.95	-0.172211	0.0865277	-1.99024	0.046564	0.23703	FALSE	FALSE	inactive	'1-2	717	573	963	471	754	825	1436	681.805	587.775	709.975	658.529	691.853	608.503	799.026
chr11	117369350	117369653	532.649	0.245601	0.102355	2.39949	0.0164178	0.108428	TRUE	TRUE	not-induced	'1-2	430	534	550	343	527	688	610	408.893	547.769	405.489	479.566	483.563	507.455	339.419
chr11	118309288	118309788	204.289	-0.214253	0.150083	-1.42757	0.153417	0.466746	FALSE	FALSE	inactive	'1-2	189	205	286	96	240	241	396	179.723	210.286	210.854	134.223	220.219	177.757	220.344
chr11	118784934	118785432	3392.51	-0.0484932	0.101569	-0.477444	0.633046	0.845362	TRUE	FALSE	not-induced	'1-2	2646	2213	3068	1597	2360	2997	4144	2516.12	2270.06	2261.89	2232.85	2165.48	2210.53	2305.82
chr11	120039384	120039884	5218.59	-0.127536	0.110622	-1.15291	0.248949	0.585414	TRUE	TRUE	not-induced	'1-2	5579	4267	6837	3337	5438	6769	5919	5305.15	4377.02	5040.6	4665.63	4989.79	4992.68	3293.48
chr11	120754482	120754982	366.134	-0.170252	0.113277	-1.50297	0.132846	0.436249	FALSE	FALSE	inactive	'1-2	382	327	490	235	379	397	783	363.249	335.432	361.254	328.566	347.762	292.819	435.68
chr11	121318958	121319458	490.102	-0.276759	0.134846	-2.05241	0.0401298	0.213553	TRUE	TRUE	not-induced	'1-2	634	441	803	322	745	866	789	602.879	452.371	592.014	450.205	683.595	638.744	439.019
chr11	123447683	123448183	4645.18	-0.142281	0.0882015	-1.61314	0.106715	0.387912	TRUE	TRUE	not-induced	'1-2	5934	4664	6932	3451	5216	6066	5924	5642.72	4784.26	5110.64	4825.02	4786.08	4474.16	3296.26
chr11	124906870	124907370	569.283	-0.149899	0.0981072	-1.52791	0.126535	0.426814	FALSE	FALSE	inactive	'1-2	734	602	928	478	824	871	1793	697.971	617.522	684.171	668.316	756.084	642.432	997.669
chr11	125462009	125463067	5789.31	-0.0500794	0.1078	-0.464558	0.642248	0.849617	TRUE	FALSE	not-induced	'1-2	3834	3282	4960	2608	4062	4936	6464	3645.8	3366.63	3656.78	3646.38	3727.2	3640.69	3596.73
chr11	126196935	126198845	4833.19	-0.122952	0.0797507	-1.5417	0.123147	0.420557	TRUE	TRUE	not-induced	'1-2	4143	3481	5273	2559	4081	4718	6249	3939.63	3570.76	3887.54	3577.87	3744.63	3479.9	3477.1
chr11	126827466	126827826	1936.81	2.56446	0.225665	11.364	6.31642e-30	5.47385e-28	TRUE	TRUE	induced	'1-2	1031	7590	1496	5393	1561	7419	960	980.392	7785.71	1102.93	7540.23	1432.34	5472.1	534.167
chr11	128882811	128883311	333.833	-0.0744076	0.12665	-0.587505	0.556864	0.809619	FALSE	FALSE	inactive	'1-2	322	273	487	235	302	396	888	306.194	280.039	359.042	328.566	277.108	292.081	494.105
chr11	130033633	130034133	959.468	-0.148529	0.075831	-1.95869	0.0501494	0.247854	TRUE	TRUE	not-induced	'1-2	1024	864	1421	622	1047	1263	1379	973.735	886.278	1047.64	869.65	960.704	931.563	767.309
chr11	130259864	130260364	400.576	0.0290887	0.173635	0.167528	0.866955	0.951096	TRUE	TRUE	not-induced	'1-2	563	559	813	500	718	761	565	535.364	573.414	599.387	699.076	658.821	561.298	314.38
chr11	130608012	130608512	650.212	-0.046327	0.0994821	-0.465682	0.641443	0.849068	TRUE	TRUE	not-induced	'1-2	714	645	978	502	758	907	1153	678.952	661.631	721.034	701.872	695.524	668.985	641.557
chr12	606433	607188	1705.67	-0.098702	0.107733	-0.916171	0.359577	0.686043	FALSE	FALSE	inactive	'1-2	1780	1309	2027	1107	1574	1948	4492	1692.63	1342.75	1494.41	1547.75	1444.27	1436.8	2499.46
chr12	2906834	2907334	585.292	-0.299437	0.0861035	-3.47763	0.00050586	0.00506178	FALSE	FALSE	inactive	'1-2	604	440	720	313	569	587	1486	574.352	451.345	530.822	437.621	522.102	432.959	826.847
chr12	3541280	3541780	1517.54	-0.176567	0.129909	-1.35917	0.174094	0.496979	TRUE	TRUE	not-induced	'1-2	2803	2165	3086	1586	2872	3068	1088	2665.41	2220.82	2275.16	2217.47	2635.28	2262.89	605.39
chr12	4250441	4250941	742.112	-0.0568643	0.0991255	-0.573659	0.566198	0.81298	FALSE	FALSE	inactive	'1-2	895	878	1134	545	915	1038	2063	851.068	900.639	836.045	761.993	839.583	765.608	1147.9
chr12	6195809	6196309	770.589	-0.0402711	0.0995224	-0.404643	0.68574	0.871126	TRUE	TRUE	not-induced	'1-2	735	717	1097	505	871	1082	1137	698.921	735.488	808.767	706.066	799.21	798.061	632.655
chr12	7144158	7144658	1407.12	-0.030122	0.0909765	-0.331097	0.740572	0.894554	FALSE	FALSE	inactive	'1-2	1354	1165	1756	917	1488	1877	2956	1287.54	1195.04	1294.62	1282.1	1365.36	1384.44	1644.79
chr12	9608035	9608535	625.227	-0.184897	0.106312	-1.7392	0.0820002	0.335697	FALSE	FALSE	inactive	'1-2	798	638	992	468	737	814	1805	758.829	654.451	731.355	654.335	676.255	600.39	1004.35
chr12	10658184	10658684	6432.92	-0.0928962	0.0966804	-0.960859	0.336623	0.669315	TRUE	TRUE	not-induced	'1-2	5687	4219	6730	3914	5551	6380	1610	5407.85	4327.79	4961.71	5472.36	5093.47	4705.76	895.843
chr12	11323727	11324227	10069.5	-0.0523224	0.118615	-0.44111	0.659133	0.85806	TRUE	TRUE	not-induced	'1-2	6076	4774	7631	4015	6352	8277	4397	5777.75	4897.1	5625.98	5613.58	5828.45	6104.95	2446.6
chr12	14098350	14099001	929.285	-0.0549369	0.110314	-0.498003	0.618482	0.838899	FALSE	FALSE	inactive	'1-2	860	709	999	538	812	995	1819	817.786	727.281	736.516	752.205	745.073	733.892	1012.14
chr12	15081860	15083522	144.312	-0.263148	0.195874	-1.34345	0.179126	0.505291	TRUE	TRUE	not-induced	'1-2	152	101	216	97	107	136	157	144.539	103.604	159.247	135.621	98.1808	100.311	87.3586
chr12	15353284	15353784	43.5638	-0.347387	0.231167	-1.50275	0.132903	0.436249	FALSE	FALSE	inactive	'1-2	61	48	58	21	63	58	95	58.0057	49.2377	42.7607	29.3612	57.8074	42.7796	52.8603
chr12	15373575	15373990	118.481	0.067585	0.170656	0.39603	0.692083	0.872441	FALSE	FALSE	inactive	'1-2	104	121	170	93	117	134	215	98.895	124.12	125.333	130.028	107.357	98.8357	119.631
chr12	16626821	16627321	126.933	0.0513111	0.249248	0.205863	0.836898	0.935949	FALSE	FALSE	inactive	'1-2	94	107	156	63	90	135	270	89.3859	109.759	115.012	88.0835	82.582	99.5732	150.235
chr12	20068143	20070394	686.21	-0.0378383	0.0965574	-0.391873	0.695152	0.873844	FALSE	FALSE	inactive	'1-2	555	516	736	361	584	717	1234	527.757	529.305	542.618	504.733	535.865	528.845	686.628
chr12	20120371	20120871	211.554	0.0177443	0.149282	0.118865	0.905383	0.964317	FALSE	FALSE	inactive	'1-2	153	157	218	118	195	224	333	145.49	161.048	160.721	164.982	178.928	165.218	185.289
chr12	22058665	22059092	61.8678	0.239433	0.267391	0.895439	0.370553	0.696351	FALSE	FALSE	inactive	'1-2	70	76	68	47	63	84	144	66.5639	77.9596	50.1332	65.7131	57.8074	61.9567	80.1251
chr12	22457319	22457700	14.5715	-0.744952	0.404315	-1.8425	0.0654018	0.293791	TRUE	TRUE	not-induced	'1-2	14	16	44	4	27	25	23	13.3128	16.4126	32.4391	5.59261	24.7746	18.4395	12.7978
chr12	25992259	25992759	84.1927	-0.0331777	0.218155	-0.152083	0.879121	0.954317	TRUE	TRUE	not-induced	'1-2	56	48	81	43	71	87	68	53.2512	49.2377	59.7175	60.1205	65.148	64.1694	37.8369
chr12	26897892	26898392	189.162	0.128214	0.163505	0.784159	0.432947	0.736955	FALSE	FALSE	inactive	'1-2	210	237	242	157	204	216	446	199.692	243.111	178.415	219.51	187.186	159.317	248.165
chr12	28134771	28135271	99.5623	-0.0687523	0.217524	-0.316067	0.751952	0.899762	TRUE	TRUE	not-induced	'1-2	152	174	147	75	184	158	211	144.539	178.487	108.376	104.861	168.834	116.538	117.406
chr12	28609890	28610390	88.553	-0.0299106	0.181463	-0.16483	0.869077	0.951621	FALSE	FALSE	inactive	'1-2	84	84	141	65	99	126	179	79.8767	86.1659	103.953	90.8798	90.8402	92.935	99.6
chr12	28612380	28612880	12.6417	-0.0656619	0.46998	-0.139712	0.888887	0.958532	FALSE	FALSE	inactive	'1-2	20	13	9	7	8	11	54	19.0183	13.3352	6.63528	9.78706	7.34062	8.11337	30.0469
chr12	31399385	31399885	2990.95	-0.0861547	0.158332	-0.544139	0.586346	0.822703	TRUE	TRUE	not-induced	'1-2	3309	2829	4990	2425	2605	3250	2071	3146.57	2901.94	3678.89	3390.52	2390.29	2397.13	1152.36
chr12	32701530	32702030	425.742	-0.0795693	0.109836	-0.724437	0.468797	0.759327	FALSE	FALSE	inactive	'1-2	447	414	659	277	470	616	1094	425.058	424.675	485.85	387.288	431.261	454.349	608.728
chr12	39837105	39837587	2367.92	0.354406	0.165487	2.1416	0.0322258	0.182728	TRUE	TRUE	not-induced	'1-2	2677	3457	3658	2260	2795	4440	2600	2545.6	3546.14	2696.87	3159.82	2564.63	3274.85	1446.7
chr12	42351321	42351821	99.4159	-0.152615	0.174977	-0.872203	0.383097	0.705713	FALSE	FALSE	inactive	'1-2	115	97	144	51	112	149	267	109.355	99.5011	106.164	71.3057	102.769	109.899	148.565
chr12	45628056	45628417	257.272	-0.364879	0.200717	-1.81788	0.0690832	0.303959	TRUE	TRUE	not-induced	'1-2	273	167	432	169	424	460	279	259.599	171.306	318.493	236.288	389.053	339.287	155.242
chr12	50968280	50968780	453.857	-0.0295402	0.0944738	-0.312682	0.754522	0.900614	FALSE	FALSE	inactive	'1-2	613	494	642	370	535	666	1058	582.91	506.738	473.317	517.316	490.904	491.228	588.697
chr12	51041196	51041702	794.158	0.0349247	0.193032	0.180927	0.856425	0.94542	FALSE	FALSE	inactive	'1-2	276	272	399	210	348	439	850	262.452	279.013	294.164	293.612	319.317	323.797	472.961
chr12	51715684	51716184	421.416	-0.295132	0.119809	-2.46336	0.0137642	0.0936762	TRUE	FALSE	not-induced	'1-2	518	395	636	254	514	547	812	492.573	405.185	468.893	355.13	471.635	403.456	451.817
chr12	51780059	51780702	718.889	-0.0754857	0.0955732	-0.789821	0.429632	0.73555	FALSE	FALSE	inactive	'1-2	730	596	1020	489	755	994	1459	694.167	611.368	751.998	683.696	692.771	733.154	811.823
chr12	51834621	51835121	90.9369	-0.0664212	0.25161	-0.263985	0.791791	0.917614	FALSE	FALSE	inactive	'1-2	52	73	78	31	62	53	567	49.4475	74.8823	57.5058	43.3427	56.8898	39.0917	315.493
chr12	53011028	53011418	1217.79	0.143157	0.109019	1.31314	0.189135	0.518843	FALSE	FALSE	inactive	'1-2	1420	1436	1784	1031	1381	1937	3006	1350.3	1473.03	1315.26	1441.49	1267.17	1428.69	1672.61
chr12	53551443	53553555	1808.75	0.44561	0.113947	3.91068	9.20363e-05	0.00103218	FALSE	TRUE	not-induced	'1-2	1659	2133	2000	1467	1593	2589	3131	1577.57	2188	1474.51	2051.09	1461.7	1909.59	1742.16
chr12	53775763	53776237	2446.43	-0.115013	0.167677	-0.685921	0.492763	0.773729	TRUE	TRUE	not-induced	'1-2	1675	1485	2262	1119	1845	2016	2515	1592.78	1523.29	1667.67	1564.53	1692.93	1486.96	1399.41
chr12	54019696	54020611	1554.13	-0.109332	0.0976489	-1.11965	0.262864	0.599959	FALSE	FALSE	inactive	'1-2	1128	1023	1498	673	1297	1522	2042	1072.63	1049.38	1104.41	940.956	1190.1	1122.6	1136.22
chr12	54560341	54560841	418.681	-0.136918	0.103969	-1.31692	0.187867	0.517638	FALSE	FALSE	inactive	'1-2	541	435	814	357	565	731	1262	514.444	446.216	600.124	499.14	518.431	539.171	702.208
chr12	54601480	54601980	1391.1	-0.0228973	0.0745139	-0.307289	0.758623	0.902233	FALSE	FALSE	inactive	'1-2	1502	1246	1820	1009	1463	1845	2641	1428.27	1278.13	1341.8	1410.73	1342.42	1360.83	1469.52
chr12	56241434	56242161	417.321	0.0300802	0.135005	0.222807	0.823686	0.929882	FALSE	FALSE	inactive	'1-2	408	397	476	273	391	453	1521	387.973	407.237	350.933	381.695	358.773	334.124	846.322
chr12	65187373	65187873	671.755	-0.0934676	0.0967498	-0.966076	0.334006	0.666729	FALSE	FALSE	inactive	'1-2	909	797	1115	531	960	1138	1919	864.38	817.55	822.037	742.418	880.874	839.365	1067.78
chr12	68951830	68952330	229.566	0.00420143	0.123776	0.0339437	0.972922	0.991717	FALSE	FALSE	inactive	'1-2	249	216	299	182	229	271	746	236.777	221.569	220.439	254.464	210.125	199.884	415.093
chr12	69501785	69502285	570.239	-0.0397193	0.117066	-0.339291	0.734391	0.891915	FALSE	FALSE	inactive	'1-2	517	458	735	347	435	602	1022	491.622	469.809	541.881	485.159	399.146	444.023	568.666
chr12	70084166	70084666	190.977	-0.0254147	0.139244	-0.182519	0.855175	0.94477	FALSE	FALSE	inactive	'1-2	222	189	214	128	215	245	422	211.103	193.873	157.772	178.963	197.279	180.707	234.811
chr12	70133155	70133655	11248.3	-0.156787	0.221065	-0.709235	0.478179	0.764085	TRUE	TRUE	not-induced	'1-2	16708	13868	30051	13965	30147	34147	5274	15887.9	14225.6	22155.2	19525.2	27662.2	25186.1	2934.58
chr12	76424480	76424980	6084.95	-0.187557	0.0838816	-2.23597	0.0253536	0.153031	TRUE	TRUE	not-induced	'1-2	8635	6673	10315	4727	7428	8704	8425	8211.14	6845.06	7604.77	6609.06	6815.76	6419.89	4687.88
chr12	76658209	76658709	98.2456	-0.0298169	0.199062	-0.149787	0.880933	0.955192	FALSE	FALSE	inactive	'1-2	90	115	177	78	115	124	243	85.5822	117.965	130.494	109.056	105.521	91.4599	135.211
chr12	78780417	78781306	511.631	0.266187	0.0947067	2.81065	0.00494422	0.039373	FALSE	FALSE	inactive	'1-2	516	508	580	387	443	719	1219	490.671	521.099	427.607	541.085	406.487	530.32	678.281
chr12	81319555	81320055	328.252	-0.100895	0.126894	-0.79511	0.42655	0.73361	FALSE	FALSE	inactive	'1-2	452	387	466	230	459	526	763	429.813	396.979	343.56	321.575	421.168	387.967	424.552
chr12	85557771	85558271	171.237	-0.191737	0.221897	-0.864081	0.387543	0.708291	TRUE	TRUE	not-induced	'1-2	251	225	289	180	313	227	276	238.679	230.802	213.066	251.667	287.202	167.431	153.573
chr12	89157268	89157768	272.187	0.0252299	0.122994	0.205131	0.837469	0.936166	FALSE	FALSE	inactive	'1-2	318	325	388	200	294	355	633	302.391	333.38	286.054	279.63	269.768	261.841	352.217
chr12	89722029	89722812	340.328	-0.122584	0.112433	-1.09029	0.275587	0.614282	FALSE	FALSE	inactive	'1-2	328	323	454	222	356	351	980	311.9	331.328	334.713	310.39	326.658	258.89	545.296
chr12	89900670	89901826	200.064	0.0376769	0.131269	0.28702	0.774097	0.909531	FALSE	FALSE	inactive	'1-2	148	148	229	115	168	223	447	140.735	151.816	168.831	160.787	154.153	164.48	248.722
chr12	90126256	90126756	74.3463	-0.394294	0.220014	-1.79213	0.0731125	0.312443	FALSE	FALSE	inactive	'1-2	67	48	89	21	57	75	138	63.7112	49.2377	65.6155	29.3612	52.3019	55.3185	76.7866
chr12	91210377	91210734	121.598	-0.172966	0.150117	-1.1522	0.249237	0.585414	FALSE	FALSE	inactive	'1-2	129	110	151	71	132	138	316	122.668	112.836	111.325	99.2688	121.12	101.786	175.83
chr12	92277464	92277896	25.9675	0.785059	0.348294	2.25401	0.0241955	0.147725	FALSE	FALSE	inactive	'1-2	28	53	22	15	25	48	82	26.6256	54.3666	16.2196	20.9723	22.9394	35.4038	45.6268
chr12	95878300	95878686	28.8476	0.162366	0.255764	0.634825	0.525543	0.793193	FALSE	FALSE	inactive	'1-2	28	35	45	24	36	47	113	26.6256	35.9025	33.1764	33.5556	33.0328	34.6662	62.876
chr12	98582321	98582821	191.231	0.00676541	0.180946	0.0373892	0.970175	0.990318	FALSE	FALSE	inactive	'1-2	165	164	254	163	217	211	372	156.901	168.229	187.262	227.899	199.114	155.629	206.99
chr12	98757880	98758380	687.981	0.0223333	0.0767651	0.290931	0.771104	0.908379	FALSE	FALSE	inactive	'1-2	905	793	1152	614	830	1140	1637	860.577	813.447	849.316	858.465	761.589	840.841	910.867
chr12	99094955	99095259	36.1209	-0.311553	0.321801	-0.968156	0.332966	0.665421	FALSE	FALSE	inactive	'1-2	22	23	38	20	39	25	91	20.9201	23.593	28.0156	27.963	35.7855	18.4395	50.6346
chr12	101060359	101060859	356.862	0.0729228	0.11062	0.659218	0.509756	0.785412	FALSE	FALSE	inactive	'1-2	382	451	535	282	449	509	960	363.249	462.629	394.431	394.279	411.992	375.428	534.167
chr12	101161171	101161671	89.3409	0.1284	0.169337	0.758249	0.448302	0.74538	FALSE	FALSE	inactive	'1-2	91	94	114	79	111	126	205	86.5331	96.4238	84.0469	110.454	101.851	92.935	114.067
chr12	105050082	105050582	1040.43	0.0519307	0.088377	0.587604	0.556798	0.809619	TRUE	TRUE	not-induced	'1-2	1299	1280	1898	948	1381	1906	1750	1235.24	1313	1399.31	1325.45	1267.17	1405.83	973.743
chr12	106500609	106501109	299.521	-0.120756	0.108166	-1.1164	0.264252	0.600627	FALSE	FALSE	inactive	'1-2	395	318	453	245	424	461	740	375.611	326.2	333.976	342.547	389.053	340.024	411.754
chr12	110546866	110547366	761.339	-0.157148	0.179668	-0.874659	0.38176	0.704723	FALSE	FALSE	inactive	'1-2	438	365	570	254	469	549	1150	416.5	374.411	420.234	355.13	430.344	404.931	639.888
chr12	111003685	111004185	314.377	-0.22699	0.108261	-2.0967	0.0360204	0.197522	FALSE	FALSE	inactive	'1-2	413	282	428	203	374	432	1016	392.727	289.271	315.544	283.825	343.174	318.634	565.327
chr12	116178502	116179002	318.199	-0.0320809	0.144415	-0.222144	0.824202	0.930156	FALSE	FALSE	inactive	'1-2	286	337	488	225	418	451	634	271.961	345.689	359.78	314.584	383.547	332.648	352.773
chr12	116965697	116966197	1496.82	-0.157325	0.136704	-1.15084	0.249798	0.586417	TRUE	TRUE	not-induced	'1-2	2015	1520	2330	1246	2186	2379	422	1916.09	1559.19	1717.8	1742.1	2005.82	1754.7	234.811
chr12	117578555	117579055	547.395	-0.139367	0.0960489	-1.451	0.146779	0.45795	FALSE	FALSE	inactive	'1-2	638	591	881	384	650	732	1238	606.683	606.239	649.52	536.89	596.425	539.908	688.853
chr12	118681569	118682069	303.556	-0.130924	0.140284	-0.933281	0.350675	0.679998	FALSE	FALSE	inactive	'1-2	274	236	316	164	293	304	708	260.55	242.085	232.972	229.297	268.85	224.224	393.949
chr12	120148022	120149827	2831.57	-0.0496236	0.0794835	-0.624327	0.532413	0.79602	FALSE	FALSE	inactive	'1-2	2104	1969	2577	1293	2070	2408	3705	2000.72	2019.77	1899.9	1807.81	1899.39	1776.09	2061.55
chr12	121559034	121559534	268.185	-0.141398	0.124939	-1.13173	0.257747	0.595422	FALSE	FALSE	inactive	'1-2	353	280	423	200	306	373	918	335.672	287.22	311.858	279.63	280.779	275.117	510.798
chr12	122244455	122244955	427.039	-0.0918908	0.109085	-0.842381	0.399575	0.717533	TRUE	TRUE	not-induced	'1-2	486	356	630	291	420	618	715	462.144	365.179	464.47	406.862	385.382	455.824	397.843
chr12	122948833	122949333	3359.46	-0.314148	0.358719	-0.875751	0.381165	0.704442	TRUE	TRUE	not-induced	'1-2	4182	3262	6275	2843	7295	6754	428	3976.72	3346.11	4626.26	3974.94	6693.73	4981.61	238.15
chr12	124860897	124861288	686.387	0.148855	0.0909843	1.63605	0.101829	0.37928	TRUE	TRUE	not-induced	'1-2	744	749	941	532	725	1053	1086	707.48	768.313	693.755	743.817	665.244	776.671	604.277
chr12	124862555	124863055	2937.89	-0.172971	0.0798912	-2.16508	0.0303816	0.174119	FALSE	FALSE	inactive	'1-2	2211	1815	2863	1403	2438	2576	4112	2102.47	1861.8	2110.76	1961.61	2237.05	1900	2288.02
chr12	125271133	125271489	1164.02	-0.152805	0.119289	-1.28097	0.200203	0.531805	FALSE	FALSE	inactive	'1-2	730	565	1076	549	897	995	1525	694.167	579.568	793.285	767.585	823.067	733.892	848.547
chr12	131581586	131582046	3100.15	0.506815	0.08671	5.84494	5.06763e-09	8.50493e-08	TRUE	TRUE	not-induced	'1-2	2999	3890	3717	2947	3262	5541	3345	2851.79	3990.3	2740.37	4120.35	2993.14	4086.93	1861.24
chr12	132280646	132281035	1507.75	-0.17219	0.103633	-1.66153	0.0966065	0.368964	FALSE	FALSE	inactive	'1-2	1346	947	1519	732	1132	1430	2636	1279.93	971.418	1119.89	1023.45	1038.7	1054.74	1466.73
chr12	132844222	132844722	951.652	-0.144843	0.137979	-1.04975	0.293833	0.631164	FALSE	FALSE	inactive	'1-2	994	804	1107	553	1054	1174	4179	945.208	824.731	816.139	773.178	967.127	865.918	2325.3
chr12	133174821	133175321	116.163	-0.293719	0.194057	-1.51357	0.130136	0.432207	FALSE	FALSE	inactive	'1-2	117	69	126	55	106	129	264	111.257	70.7791	92.8939	76.8983	97.2632	95.1478	146.896
chr13	25086611	25086870	2665.65	0.0933794	0.076997	1.21277	0.225219	0.559973	TRUE	TRUE	not-induced	'1-2	1454	1385	1868	1091	1620	2143	1730	1382.63	1420.71	1377.19	1525.38	1486.48	1580.63	962.614
chr13	26456027	26456527	389.603	-0.142537	0.117116	-1.21706	0.223582	0.558721	FALSE	FALSE	inactive	'1-2	412	270	438	237	362	458	879	391.776	276.962	322.917	331.362	332.163	337.811	489.097
chr13	27743253	27743753	162.916	-0.183222	0.145688	-1.25763	0.208524	0.541731	FALSE	FALSE	inactive	'1-2	157	127	202	94	172	188	599	149.293	130.275	148.925	131.426	157.823	138.665	333.298
chr13	29115643	29116143	70.3394	-0.0528147	0.199981	-0.264098	0.791704	0.917614	FALSE	FALSE	inactive	'1-2	110	64	110	71	91	128	211	104.6	65.6502	81.0979	99.2688	83.4995	94.4102	117.406
chr13	30414450	30414894	8.77891	-0.393564	0.527678	-0.745841	0.455763	0.750802	FALSE	FALSE	inactive	'1-2	13	6	15	1	5	16	20	12.3619	6.15471	11.0588	1.39815	4.58789	11.8013	11.1285
chr13	30476389	30476889	252.952	-0.262869	0.172221	-1.52635	0.126924	0.427118	FALSE	FALSE	inactive	'1-2	271	179	316	131	260	321	456	257.698	183.615	232.972	183.158	238.57	236.763	253.73
chr13	30951482	30952167	184.293	0.914656	0.16273	5.62068	1.90204e-08	3.01187e-07	FALSE	TRUE	not-induced	'1-2	152	339	197	194	167	297	353	144.539	347.741	145.239	271.241	153.235	219.061	196.418
chr13	31005214	31005714	143.587	-0.11267	0.152765	-0.737539	0.460795	0.754597	FALSE	FALSE	inactive	'1-2	147	135	250	123	195	214	316	139.784	138.481	184.313	171.973	178.928	157.842	175.83
chr13	32015891	32016618	1126.6	-0.091332	0.113124	-0.807365	0.419456	0.72978	TRUE	TRUE	not-induced	'1-2	1317	1165	1722	905	1357	1466	1827	1252.35	1195.04	1269.55	1265.33	1245.15	1081.29	1016.59
chr13	34187352	34187852	639.809	-0.160242	0.114911	-1.39449	0.163171	0.479695	FALSE	FALSE	inactive	'1-2	735	618	886	439	746	781	1976	698.921	633.935	653.206	613.788	684.513	576.05	1099.49
chr13	34850852	34851352	130.961	-0.129225	0.156056	-0.828068	0.407632	0.722563	FALSE	FALSE	inactive	'1-2	100	92	160	72	129	146	295	95.0914	94.3722	117.961	100.667	118.367	107.687	164.145
chr13	36538844	36539344	191.564	-0.182931	0.318775	-0.573854	0.566066	0.81298	FALSE	FALSE	inactive	'1-2	98	88	108	61	114	94	206	93.1895	90.2691	79.6234	85.2872	104.604	69.3325	114.623
chr13	37117821	37118321	301.601	-0.119161	0.114003	-1.04524	0.295911	0.633448	FALSE	FALSE	inactive	'1-2	290	259	368	198	360	360	713	275.765	265.678	271.309	276.834	330.328	265.529	396.731
chr13	41635458	41635894	4872.84	-0.0664738	0.086654	-0.767118	0.443012	0.742803	TRUE	TRUE	not-induced	'1-2	3551	3057	4795	2495	3956	4670	2815	3376.69	3135.82	3535.13	3488.39	3629.94	3444.5	1566.33
chr13	42585978	42586478	1063.47	-0.138497	0.0802079	-1.72672	0.0842175	0.340481	FALSE	FALSE	inactive	'1-2	1240	1079	1579	755	1197	1315	2098	1179.13	1106.82	1164.12	1055.6	1098.34	969.917	1167.38
chr13	43772253	43772753	248.87	-0.099819	0.130465	-0.7651	0.444212	0.743562	FALSE	FALSE	inactive	'1-2	318	240	378	208	294	352	651	302.391	246.188	278.682	290.816	269.768	259.628	362.232
chr13	43795074	43795574	262.381	-0.191585	0.111526	-1.71785	0.0858245	0.344817	FALSE	FALSE	inactive	'1-2	323	234	380	211	328	336	567	307.145	240.034	280.156	295.01	300.965	247.827	315.493
chr13	44891821	44892321	297.893	-0.290587	0.195779	-1.48426	0.13774	0.443453	FALSE	FALSE	inactive	'1-2	443	296	496	203	437	515	817	421.255	303.632	365.678	283.825	400.981	379.853	454.599
chr13	45337630	45338895	1304.61	-0.133273	0.0753849	-1.7679	0.0770775	0.32325	FALSE	FALSE	inactive	'1-2	1302	1054	1536	806	1339	1457	2374	1238.09	1081.18	1132.42	1126.91	1228.64	1074.65	1320.95
chr13	45524464	45525199	126.876	0.170099	0.154341	1.1021	0.270418	0.607495	FALSE	FALSE	inactive	'1-2	110	130	145	73	114	160	356	104.6	133.352	106.902	102.065	104.604	118.013	198.087
chr13	46863646	46864146	134.404	0.180895	0.201186	0.899142	0.368577	0.694646	FALSE	FALSE	inactive	'1-2	108	119	148	59	89	169	428	102.699	122.068	109.113	82.4909	81.6644	124.651	238.15
chr13	47305638	47306138	805.699	-0.102536	0.0865529	-1.18466	0.236151	0.571116	FALSE	FALSE	inactive	'1-2	778	635	878	461	722	832	1381	739.811	651.373	647.308	644.548	662.491	613.666	768.422
chr13	50076978	50077478	2536.79	-0.0104516	0.128071	-0.0816076	0.934959	0.976123	FALSE	FALSE	inactive	'1-2	2593	2159	3259	1836	2561	3236	6901	2465.72	2214.67	2402.71	2567.01	2349.92	2386.81	3839.89
chr13	54113002	54113502	53.2223	-0.180747	0.231936	-0.779297	0.435805	0.738063	FALSE	FALSE	inactive	'1-2	57	44	52	33	51	45	151	54.2021	45.1345	38.3372	46.139	46.7964	33.1911	84.0201
chr13	69421728	69422228	282.931	-0.0205075	0.137763	-0.14886	0.881664	0.955192	FALSE	FALSE	inactive	'1-2	335	289	391	188	336	456	877	318.556	296.452	288.266	262.852	308.306	336.336	487.984
chr13	73939183	73941062	200.554	0.00926121	0.134896	0.0686543	0.945265	0.980392	FALSE	FALSE	inactive	'1-2	182	193	320	149	241	309	621	173.066	197.976	235.921	208.325	221.136	227.912	345.54
chr13	74181656	74183001	260.754	-0.22558	0.138439	-1.62946	0.103216	0.382552	FALSE	FALSE	inactive	'1-2	277	250	371	127	260	305	716	263.403	256.446	273.521	177.565	238.57	224.962	398.4
chr13	77660860	77661360	43.3338	-0.0978711	0.275077	-0.355796	0.721994	0.886948	FALSE	FALSE	inactive	'1-2	43	41	48	29	44	38	111	40.8893	42.0572	35.3882	40.5464	40.3734	28.028	61.7631
chr13	80801371	80801871	28.178	0.0364579	0.311757	0.116943	0.906905	0.964366	FALSE	FALSE	inactive	'1-2	43	34	40	25	33	45	78	40.8893	34.8767	29.4901	34.9538	30.2801	33.1911	43.4011
chr13	81047761	81048261	417.107	-0.344857	0.38088	-0.905421	0.365243	0.69163	TRUE	TRUE	not-induced	'1-2	166	123	261	95	226	243	229	157.852	126.172	192.423	132.824	207.372	179.232	127.421
chr13	81880046	81880546	107.56	0.0972651	0.165859	0.586432	0.557585	0.809823	FALSE	FALSE	inactive	'1-2	109	118	140	96	121	123	321	103.65	121.043	103.215	134.223	111.027	90.7223	178.612
chr13	92345680	92346180	609.913	-0.124443	0.0847317	-1.46867	0.141923	0.450267	FALSE	FALSE	inactive	'1-2	646	616	926	392	728	837	1308	614.29	631.883	682.697	548.075	667.996	617.354	727.803
chr13	94392200	94392959	213.077	-0.240723	0.208913	-1.15227	0.249212	0.585414	TRUE	TRUE	not-induced	'1-2	126	137	218	81	133	122	191	119.815	140.533	160.721	113.25	122.038	89.9847	106.277
chr13	97913488	97913988	575.908	0.168472	0.116832	1.442	0.149301	0.46179	FALSE	FALSE	inactive	'1-2	530	580	727	393	585	846	1237	503.984	594.955	535.983	549.474	536.783	623.992	688.297
chr13	97932065	97932549	139.825	0.353394	0.177812	1.98746	0.0468718	0.237944	FALSE	FALSE	inactive	'1-2	83	120	158	115	128	165	280	78.9258	123.094	116.486	160.787	117.45	121.701	155.799
chr13	101492703	101493203	979.192	-0.13182	0.121794	-1.08232	0.27911	0.617233	FALSE	FALSE	inactive	'1-2	1265	936	1446	715	1024	1314	2139	1202.91	960.134	1066.07	999.678	939.599	969.179	1190.19
chr13	106556348	106556686	228.263	-0.235035	0.163756	-1.43528	0.151208	0.463676	TRUE	FALSE	not-induced	'1-2	350	274	434	197	313	331	481	332.82	281.065	319.968	275.436	287.202	244.139	267.64
chr13	108487926	108488426	241.607	-0.0136085	0.141719	-0.0960244	0.923501	0.970824	FALSE	FALSE	inactive	'1-2	229	263	302	149	305	315	674	217.759	269.781	222.65	208.325	279.861	232.338	375.03
chr13	111227779	111228060	609.084	-0.123293	0.109025	-1.13087	0.258108	0.595943	TRUE	TRUE	not-induced	'1-2	762	619	1088	501	762	962	984	724.596	634.961	802.132	700.474	699.194	709.551	547.522
chr13	111505531	111505986	993.686	0.347213	0.108652	3.19564	0.00139522	0.0127968	FALSE	TRUE	not-induced	'1-2	867	930	1188	876	966	1514	1731	824.442	953.98	875.857	1224.78	886.38	1116.7	963.171
chr13	113887877	113888377	717.573	0.10935	0.0841877	1.29889	0.193983	0.524838	FALSE	FALSE	inactive	'1-2	726	744	989	542	709	973	1953	690.363	763.184	729.143	757.798	650.562	717.665	1086.7
chr13	114037600	114038100	0.506168	-1.69939	4.81558	-0.352896	0.724167	0.887346	FALSE	FALSE	inactive	'1-2	0	0	0	0	2	0	5	0	0	0	0	1.83515	0	2.78212
chr13	114536429	114536802	26960.5	3.27167	0.249846	13.0947	3.52863e-39	7.31245e-37	FALSE	TRUE	induced	'1-2	9800	92772	11945	79578	12713	110198	23945	9318.95	95164.1	8806.49	111262	11665.2	81279.8	13323.6
chr13	114590681	114591344	695.245	-0.15947	0.11548	-1.38093	0.1673	0.486363	FALSE	FALSE	inactive	'1-2	809	639	1034	507	730	830	2733	769.289	655.476	762.32	708.863	669.831	612.191	1520.71
chr13	114797789	114798053	5223.75	0.349292	0.199326	1.75236	0.0797111	0.330018	TRUE	TRUE	not-induced	'1-2	7618	8281	9238	6806	7961	12474	6345	7244.06	8494.52	6810.75	9515.82	7304.83	9200.57	3530.51
chr13	114812790	114813247	2565.18	-0.178932	0.0864436	-2.06993	0.038459	0.206583	TRUE	FALSE	not-induced	'1-2	1765	1338	2015	1006	1664	1850	2591	1678.36	1372.5	1485.57	1406.54	1526.85	1364.52	1441.7
chr14	23388003	23388503	3429.42	-0.0227333	0.122285	-0.185904	0.85252	0.943565	TRUE	TRUE	not-induced	'1-2	1607	1407	2349	1213	2016	2560	1067	1528.12	1443.28	1731.81	1695.96	1849.84	1888.2	593.705
chr14	23970581	23971081	19.5798	1.0193	0.381134	2.6744	0.00748639	0.0566092	FALSE	FALSE	inactive	'1-2	18	34	18	10	12	44	76	17.1164	34.8767	13.2706	13.9815	11.0109	32.4535	42.2883
chr14	24109523	24109974	1078.83	-0.110218	0.0851207	-1.29484	0.195374	0.526211	FALSE	FALSE	inactive	'1-2	1497	1236	1655	853	1363	1555	2519	1423.52	1267.87	1220.15	1192.62	1250.66	1146.94	1401.63
chr14	24511868	24512368	893.245	-0.23691	0.0842321	-2.81259	0.00491442	0.039192	FALSE	FALSE	inactive	'1-2	546	412	685	317	555	591	1487	519.199	422.623	505.018	443.214	509.255	435.909	827.403
chr14	34500787	34501287	579.931	0.0448291	0.104603	0.428563	0.668242	0.863462	FALSE	FALSE	inactive	'1-2	653	718	830	441	706	797	1502	620.947	736.513	611.92	616.585	647.81	587.851	835.75
chr14	34550619	34551565	1024.53	-0.136041	0.0903201	-1.5062	0.132015	0.435411	TRUE	TRUE	not-induced	'1-2	1119	949	1542	747	1279	1428	1342	1064.07	973.47	1136.84	1044.42	1173.58	1053.26	746.722
chr14	37103541	37104041	113.047	-0.180064	0.168967	-1.06567	0.286571	0.624595	FALSE	FALSE	inactive	'1-2	100	80	137	71	104	108	342	95.0914	82.0628	101.004	99.2688	95.428	79.6586	190.297
chr14	38896484	38896831	75.1587	1.31314	0.37976	3.45782	0.000544556	0.00542078	FALSE	FALSE	inactive	'1-2	32	85	45	60	23	57	128	30.4292	87.1917	33.1764	83.8891	21.1043	42.042	71.2223
chr14	39493232	39493732	545.914	-0.106038	0.177803	-0.596376	0.550924	0.807151	TRUE	TRUE	not-induced	'1-2	1138	865	1211	674	911	1063	934	1082.14	887.304	892.814	942.354	835.913	784.047	519.7
chr14	40651052	40651552	45.9951	-0.0771263	0.224484	-0.343572	0.731168	0.890458	FALSE	FALSE	inactive	'1-2	67	52	82	36	44	71	164	63.7112	53.3408	60.4548	50.3335	40.3734	52.3681	91.2536
chr14	43312463	43312963	65.0905	-0.14201	0.210779	-0.673739	0.500477	0.779047	FALSE	FALSE	inactive	'1-2	70	62	134	44	70	111	274	66.5639	63.5987	98.7919	61.5187	64.2304	81.8713	152.46
chr14	48132261	48132761	20.4258	0.0254291	0.435454	0.0583967	0.953433	0.984213	FALSE	FALSE	inactive	'1-2	31	28	29	10	22	38	70	29.4783	28.722	21.3803	13.9815	20.1867	28.028	38.9497
chr14	50262707	50263207	153.557	-0.11835	0.154823	-0.764419	0.444617	0.743577	FALSE	FALSE	inactive	'1-2	161	173	232	91	176	192	517	153.097	177.461	171.043	127.232	161.494	141.615	287.671
chr14	50799722	50800445	536.813	1.01709	0.183163	5.55294	2.80908e-08	4.39946e-07	TRUE	TRUE	induced	'1-2	481	1042	734	799	686	1504	272	457.389	1068.87	541.144	1117.12	629.458	1109.32	151.347
chr14	54405169	54405669	325.565	-0.35485	0.14317	-2.47853	0.0131926	0.0903455	TRUE	TRUE	not-induced	'1-2	614	346	668	325	612	637	636	583.861	354.922	492.485	454.399	561.557	469.838	353.886
chr14	55118905	55119360	2610.88	-0.152254	0.220089	-0.691784	0.489073	0.771578	TRUE	TRUE	not-induced	'1-2	1610	1320	2443	1175	2219	2485	457	1530.97	1354.04	1801.11	1642.83	2036.1	1832.89	254.286
chr14	56207050	56207907	835.002	-0.0130821	0.0764045	-0.171222	0.864049	0.94973	FALSE	FALSE	inactive	'1-2	917	775	1121	585	852	1142	1899	871.988	794.983	826.461	817.919	781.776	842.316	1056.65
chr14	56219268	56220368	838.147	-0.0763319	0.0839947	-0.90877	0.363472	0.689569	FALSE	FALSE	inactive	'1-2	859	771	1167	535	922	1149	1822	816.835	790.88	860.375	748.011	846.006	847.479	1013.81
chr14	57142757	57143257	626.965	-0.0879828	0.0992191	-0.886752	0.375212	0.700059	FALSE	FALSE	inactive	'1-2	755	667	1081	491	790	997	1503	717.94	684.198	796.971	686.492	724.886	735.367	836.306
chr14	58713549	58714049	225.29	0.108666	0.181993	0.597085	0.550451	0.807151	FALSE	FALSE	inactive	'1-2	268	270	257	150	193	249	565	254.845	276.962	189.474	209.723	177.092	183.657	314.38
chr14	59433599	59434099	257.596	-0.157708	0.160619	-0.981879	0.32616	0.660493	FALSE	FALSE	inactive	'1-2	216	187	311	141	219	248	426	205.397	191.822	229.286	197.139	200.949	182.92	237.037
chr14	61094896	61095248	154.839	0.876877	0.142479	6.15445	7.53402e-10	1.32671e-08	TRUE	TRUE	not-induced	'1-2	152	293	216	239	213	387	232	144.539	300.555	159.247	334.158	195.444	285.443	129.09
chr14	61201345	61201845	1607.34	-0.05413	0.0691521	-0.782767	0.433764	0.736955	TRUE	TRUE	not-induced	'1-2	1063	919	1353	701	1077	1308	1428	1010.82	942.696	997.504	980.104	988.231	964.754	794.574
chr14	62020582	62020933	378.902	0.422753	0.12606	3.35358	0.000797739	0.00766076	TRUE	TRUE	not-induced	'1-2	446	585	607	453	536	808	460	424.107	600.084	447.513	633.363	491.821	595.964	255.955
chr14	63645637	63646137	729.474	-0.197404	0.0980764	-2.01276	0.0441403	0.227663	FALSE	FALSE	inactive	'1-2	792	602	996	468	762	863	1503	753.124	617.522	734.304	654.335	699.194	636.531	836.306
chr14	64393086	64393586	381.747	-0.222514	0.132677	-1.67711	0.093521	0.363009	FALSE	FALSE	inactive	'1-2	612	432	594	252	467	595	1306	581.959	443.139	437.928	352.334	428.509	438.86	726.69
chr14	65545824	65546324	1214.57	-0.0287743	0.119998	-0.23979	0.810493	0.924856	FALSE	FALSE	inactive	'1-2	1280	1055	1345	807	1273	1489	2097	1217.17	1082.2	991.606	1128.31	1168.08	1098.26	1166.82
chr14	65899178	65899509	74.3559	-0.117963	0.299135	-0.394348	0.693324	0.873153	FALSE	FALSE	inactive	'1-2	39	63	76	30	75	58	123	37.0856	64.6244	56.0312	41.9445	68.8183	42.7796	68.4402
chr14	65949422	65949922	1056.97	-0.0672982	0.0968101	-0.695157	0.486957	0.770243	TRUE	TRUE	not-induced	'1-2	1405	1242	1705	820	1358	1680	2137	1336.03	1274.02	1257.02	1146.48	1246.07	1239.13	1189.08
chr14	68438314	68438814	56.0231	-0.0963163	0.250548	-0.384423	0.700665	0.876034	TRUE	TRUE	not-induced	'1-2	85	96	135	56	100	106	132	80.8277	98.4753	99.5292	78.2965	91.7577	78.1834	73.448
chr14	68566346	68566680	140.758	0.0581444	0.158777	0.366201	0.714215	0.88285	FALSE	FALSE	inactive	'1-2	152	116	191	98	128	218	310	144.539	118.991	140.815	137.019	117.45	160.792	172.492
chr14	68635421	68635748	53.1687	0.227813	0.266507	0.854808	0.392657	0.712694	FALSE	FALSE	inactive	'1-2	60	84	76	41	47	56	127	57.0548	86.1659	56.0312	57.3242	43.1261	41.3045	70.6659
chr14	68831557	68832057	504.433	-0.0297052	0.127846	-0.232351	0.816265	0.92692	FALSE	FALSE	inactive	'1-2	474	422	701	358	473	603	969	450.733	432.881	516.815	500.538	434.014	444.76	539.175
chr14	68933118	68933618	219.683	0.052892	0.16101	0.328502	0.742532	0.895701	FALSE	TRUE	not-induced	'1-2	193	198	334	177	263	335	412	183.526	203.105	246.243	247.473	241.323	247.089	229.247
chr14	68990987	68991487	519.256	-0.119664	0.0856638	-1.3969	0.162444	0.478765	TRUE	FALSE	not-induced	'1-2	633	569	903	396	644	778	1064	601.928	583.671	665.74	553.668	590.92	573.837	592.036
chr14	69006502	69007002	277.209	0.0157676	0.124046	0.12711	0.898853	0.963175	FALSE	FALSE	inactive	'1-2	291	319	370	169	317	381	808	276.716	327.225	272.784	236.288	290.872	281.018	449.591
chr14	69028307	69028807	865.854	-0.0890012	0.116499	-0.763965	0.444888	0.743649	FALSE	FALSE	inactive	'1-2	873	710	877	496	817	908	1371	830.148	728.307	646.571	693.483	749.661	669.722	762.858
chr14	69046825	69047325	2472.44	-0.0621874	0.116732	-0.532735	0.594217	0.826401	FALSE	FALSE	inactive	'1-2	2010	1678	2545	1304	1845	2315	4629	1911.34	1721.27	1876.31	1823.19	1692.93	1707.5	2575.69
chr14	69998109	69999932	522.623	-0.0754785	0.115679	-0.652485	0.514088	0.786826	FALSE	FALSE	inactive	'1-2	602	504	769	355	530	716	1303	572.45	516.995	566.948	496.344	486.316	528.107	725.021
chr14	70861372	70861804	77.1539	-0.366644	0.212244	-1.72747	0.0840837	0.340213	TRUE	TRUE	not-induced	'1-2	109	105	180	58	109	100	156	103.65	107.707	132.706	81.0928	100.016	73.758	86.8022
chr14	71673482	71673982	1167.02	-0.146912	0.0860256	-1.70778	0.0876779	0.349071	TRUE	TRUE	not-induced	'1-2	1147	975	1567	744	1233	1373	1651	1090.7	1000.14	1155.28	1040.22	1131.37	1012.7	918.657
chr14	71891859	71892359	102.409	-0.117089	0.225438	-0.519384	0.603493	0.831308	FALSE	FALSE	inactive	'1-2	165	105	144	82	116	159	288	156.901	107.707	106.164	114.648	106.439	117.275	160.25
chr14	74009639	74010139	103.86	0.216491	0.194912	1.11071	0.266693	0.602754	FALSE	FALSE	inactive	'1-2	102	100	95	65	100	141	214	96.9932	102.578	70.0391	90.8798	91.7577	103.999	119.075
chr14	74397768	74398268	135.749	0.0891232	0.221543	0.402285	0.687475	0.871437	FALSE	FALSE	inactive	'1-2	137	185	191	128	183	139	417	130.275	189.77	140.815	178.963	167.917	102.524	232.029
chr14	75932636	75933136	129.566	-0.0509093	0.162028	-0.3142	0.753369	0.900553	FALSE	FALSE	inactive	'1-2	131	118	198	101	169	201	450	124.57	121.043	145.976	141.213	155.071	148.253	250.391
chr14	77451382	77451882	1501.13	-0.0960132	0.0956987	-1.00329	0.315723	0.651352	FALSE	FALSE	inactive	'1-2	1701	1357	1989	1054	1573	1861	3206	1617.5	1391.99	1466.4	1473.65	1443.35	1372.64	1783.9
chr14	80170861	80171361	105.097	0.00376153	0.188533	0.0199516	0.984082	0.995323	FALSE	FALSE	inactive	'1-2	100	119	149	59	106	132	285	95.0914	122.068	109.851	82.4909	97.2632	97.3605	158.581
chr14	80231836	80232336	248.491	0.189105	0.119548	1.58183	0.113688	0.402508	FALSE	FALSE	inactive	'1-2	278	290	384	234	259	376	896	264.354	297.478	283.105	327.167	237.653	277.33	498.556
chr14	81629935	81630688	283.046	-0.107952	0.150841	-0.715667	0.474197	0.761687	FALSE	FALSE	inactive	'1-2	333	246	389	191	324	424	794	316.654	252.343	286.792	267.047	297.295	312.734	441.801
chr14	83805248	83805748	16.4234	-0.706509	0.390714	-1.80825	0.0705673	0.30726	FALSE	FALSE	inactive	'1-2	22	8	35	14	18	17	57	20.9201	8.20628	25.8039	19.5741	16.5164	12.5389	31.7162
chr14	86488650	86489150	291.642	0.121794	0.0965842	1.26101	0.207304	0.540919	FALSE	FALSE	inactive	'1-2	334	361	463	256	383	502	740	317.605	370.308	341.348	357.927	351.432	370.265	411.754
chr14	87516311	87516811	483.138	1.07916	0.126874	8.50577	1.80394e-17	5.90265e-16	FALSE	TRUE	induced	'1-2	495	1080	672	858	677	1422	1060	470.702	1107.85	495.434	1199.61	621.2	1048.84	589.81
chr14	88812487	88812987	112.456	-0.0994832	0.19089	-0.521153	0.60226	0.830721	FALSE	FALSE	inactive	'1-2	115	95	145	64	137	173	323	109.355	97.4495	106.902	89.4817	125.708	127.601	179.725
chr14	91759529	91760029	13023.5	-0.0768923	0.336683	-0.228382	0.819349	0.927916	FALSE	FALSE	inactive	'1-2	14006	9779	14682	8343	13022	16977	63917	13318.5	10031.1	10824.4	11664.8	11948.7	12521.9	35565
chr14	91882957	91884769	1460.04	1.00747	0.156906	6.42083	1.35529e-10	2.50056e-09	FALSE	TRUE	induced	'1-2	976	2099	1329	1183	1141	2886	1926	928.092	2153.12	979.81	1654.01	1046.96	2128.65	1071.67
chr14	91975332	91975832	2672.33	-0.0476074	0.14937	-0.318722	0.749938	0.899044	TRUE	TRUE	not-induced	'1-2	5226	3963	6640	3476	4020	5684	1229	4969.47	4065.18	4895.36	4859.97	3688.66	4192.4	683.846
chr14	96740976	96741476	405.498	-0.102155	0.115709	-0.882862	0.377311	0.701464	FALSE	FALSE	inactive	'1-2	431	416	521	269	531	526	970	409.844	426.726	384.109	376.103	487.234	387.967	539.732
chr14	99122736	99123236	198.304	-0.283801	0.134464	-2.11061	0.0348057	0.192827	TRUE	FALSE	not-induced	'1-2	335	266	414	153	297	334	484	318.556	272.859	305.223	213.917	272.52	246.352	269.309
chr14	99470548	99470921	152.572	-0.259548	0.196358	-1.32181	0.186232	0.515709	FALSE	FALSE	inactive	'1-2	192	127	260	106	197	248	377	182.575	130.275	191.686	148.204	180.763	182.92	209.772
chr14	100545207	100545707	523.45	-0.0224284	0.0982628	-0.228249	0.819452	0.92796	FALSE	FALSE	inactive	'1-2	531	464	631	346	554	669	932	504.935	475.964	465.207	483.76	508.338	493.441	518.588
chr14	102305529	102305992	367.058	-0.031883	0.111696	-0.285445	0.775303	0.910186	FALSE	FALSE	inactive	'1-2	262	288	366	170	332	364	582	249.139	295.426	269.835	237.686	304.636	268.479	323.839
chr14	103985450	103985950	1854.98	-0.184505	0.0784697	-2.35129	0.0187082	0.119721	FALSE	FALSE	inactive	'1-2	1678	1408	2051	968	1684	1760	3066	1595.63	1444.3	1512.11	1353.41	1545.2	1298.14	1706
chr14	105648667	105649167	11220.7	1.9255	0.119724	16.0828	3.36714e-58	3.00917e-55	TRUE	TRUE	induced	'1-2	6644	27234	9319	20401	8541	31745	4498	6317.87	27936.2	6870.46	28523.7	7837.03	23414.5	2502.8
chr14	106068837	106069337	4919.35	-0.148335	0.138707	-1.06941	0.284884	0.623161	TRUE	TRUE	not-induced	'1-2	3529	2653	4178	2185	3239	3681	3852	3355.77	2721.41	3080.24	3054.96	2972.03	2715.03	2143.35
chr14	107270929	107271429	138.058	0.936665	0.181958	5.1477	2.63705e-07	3.7973e-06	FALSE	TRUE	not-induced	'1-2	153	283	181	192	124	267	285	145.49	290.297	133.443	268.445	113.78	196.934	158.581
chr15	20596935	20597435	167.816	-0.209593	0.146188	-1.43372	0.151653	0.464145	FALSE	FALSE	inactive	'1-2	173	134	233	114	152	164	623	164.508	137.455	171.78	159.389	139.472	120.963	346.652
chr15	26361258	26361758	371.411	0.0291462	0.104517	0.278866	0.780347	0.912064	FALSE	FALSE	inactive	'1-2	383	369	571	299	437	564	852	364.2	378.515	420.972	418.047	400.981	415.995	474.074
chr15	31312659	31313159	766.636	-0.190497	0.0917866	-2.07543	0.0379469	0.204756	FALSE	FALSE	inactive	'1-2	972	762	1139	588	1018	1034	1639	924.288	781.648	839.731	822.113	934.094	762.657	911.98
chr15	31527936	31529210	1172.06	-0.146793	0.0778484	-1.88563	0.0593453	0.27804	FALSE	FALSE	inactive	'1-2	1306	1128	1764	789	1341	1554	2351	1241.89	1157.09	1300.51	1103.14	1230.47	1146.2	1308.15
chr15	31772424	31772924	321.245	-0.0151912	0.111131	-0.136697	0.89127	0.959976	FALSE	FALSE	inactive	'1-2	342	346	446	217	344	409	825	325.212	354.922	328.815	303.399	315.647	301.67	459.05
chr15	39447902	39448402	94.3142	0.0551061	0.165987	0.33199	0.739897	0.894394	TRUE	TRUE	not-induced	'1-2	102	102	140	65	112	157	156	96.9932	104.63	103.215	90.8798	102.769	115.8	86.8022
chr15	40336543	40337832	3126.83	-0.0653239	0.062554	-1.04428	0.296356	0.633897	TRUE	FALSE	not-induced	'1-2	3325	2977	4321	2151	3569	4244	5545	3161.79	3053.76	3185.67	3007.42	3274.83	3130.29	3085.37
chr15	40631146	40631646	7315.09	-0.265875	0.218683	-1.2158	0.224061	0.558987	TRUE	TRUE	not-induced	'1-2	7448	5135	9179	4385	9360	9845	2519	7082.4	5267.4	6767.25	6130.89	8588.52	7261.47	1401.63
chr15	40748518	40749018	712.57	-0.158817	0.0862152	-1.8421	0.0654604	0.293791	FALSE	FALSE	inactive	'1-2	729	593	917	468	727	772	1235	693.216	608.29	676.061	654.335	667.079	569.411	687.184
chr15	41088025	41088473	162.052	0.20239	0.162688	1.24403	0.213487	0.547169	FALSE	FALSE	inactive	'1-2	140	158	168	118	193	231	382	133.128	162.074	123.859	164.982	177.092	170.381	212.554
chr15	46734377	46734877	163.699	-0.174758	0.152576	-1.14538	0.252051	0.589191	FALSE	FALSE	inactive	'1-2	166	182	286	95	203	230	449	157.852	186.693	210.854	132.824	186.268	169.643	249.835
chr15	46864913	46865413	492.764	-0.0737807	0.111862	-0.659572	0.509529	0.785412	FALSE	FALSE	inactive	'1-2	580	429	736	383	497	679	1231	551.53	440.062	542.618	535.492	456.036	500.816	684.959
chr15	47809996	47810499	158.258	0.0647849	0.188183	0.344266	0.730647	0.890264	FALSE	FALSE	inactive	'1-2	170	151	279	132	190	306	350	161.655	154.893	205.694	184.556	174.34	225.699	194.749
chr15	49099810	49100310	5.9529	1.48972	0.743882	2.00263	0.0452168	0.232073	FALSE	FALSE	inactive	'1-2	4	2	4	6	4	24	18	3.80365	2.05157	2.94901	8.38891	3.67031	17.7019	10.0156
chr15	52305284	52305730	36.4783	0.405253	0.279269	1.45112	0.146746	0.457948	TRUE	TRUE	not-induced	'1-2	31	65	56	49	70	62	61	29.4783	66.676	41.2862	68.5094	64.2304	45.7299	33.9419
chr15	55464040	55464540	33.769	-0.231081	0.293958	-0.786101	0.431808	0.736955	FALSE	FALSE	inactive	'1-2	57	34	35	18	35	45	115	54.2021	34.8767	25.8039	25.1667	32.1152	33.1911	63.9888
chr15	56538151	56538651	742.89	-0.0206992	0.133708	-0.154809	0.876972	0.953371	FALSE	FALSE	inactive	'1-2	392	385	723	305	473	676	823	372.758	394.927	533.034	426.436	434.014	498.604	457.937
chr15	57662946	57663446	749.772	-0.0275414	0.089613	-0.307337	0.758587	0.902233	FALSE	FALSE	inactive	'1-2	764	675	930	439	746	1003	2431	726.498	692.405	685.646	613.788	684.513	739.792	1352.67
chr15	58759079	58760253	973.588	-0.040965	0.18086	-0.226501	0.820812	0.928754	FALSE	FALSE	inactive	'1-2	532	507	658	313	527	643	950	505.886	520.073	485.113	437.621	483.563	474.264	528.603
chr15	60834609	60835109	2370.29	-0.0290558	0.181754	-0.159864	0.872988	0.952236	FALSE	FALSE	inactive	'1-2	1730	1453	2322	1173	1983	2631	14133	1645.08	1490.47	1711.9	1640.03	1819.56	1940.57	7863.95
chr15	60877846	60878346	59.8535	-0.265942	0.269569	-0.986543	0.323867	0.658406	FALSE	FALSE	inactive	'1-2	34	29	59	15	28	44	78	32.3311	29.7478	43.4979	20.9723	25.6922	32.4535	43.4011
chr15	61546310	61546810	60.8022	0.452505	0.220022	2.05664	0.0397207	0.211964	FALSE	FALSE	inactive	'1-2	64	96	64	40	58	87	261	60.8585	98.4753	47.1842	55.9261	53.2195	64.1694	145.227
chr15	63226435	63228374	2562.9	-0.132426	0.0823678	-1.60774	0.107892	0.38978	TRUE	TRUE	not-induced	'1-2	2687	2276	3502	1760	2812	3052	3946	2555.1	2334.69	2581.86	2460.75	2580.23	2251.09	2195.65
chr15	63413976	63414476	4935.8	0.0611124	0.15014	0.407035	0.683982	0.869976	TRUE	TRUE	not-induced	'1-2	4337	4359	6097	2958	4672	6582	4941	4124.11	4471.4	4495.03	4135.73	4286.92	4854.75	2749.29
chr15	63754165	63754665	78.678	-0.0357026	0.20952	-0.170402	0.864694	0.949855	FALSE	FALSE	inactive	'1-2	68	73	111	64	119	116	168	64.6621	74.8823	81.8351	89.4817	109.192	85.5592	93.4793
chr15	66228452	66228952	1389.44	-0.120226	0.0838341	-1.4341	0.151545	0.463922	FALSE	FALSE	inactive	'1-2	1754	1487	1937	958	1618	1825	4430	1667.9	1525.34	1428.06	1339.43	1484.64	1346.08	2464.96
chr15	67417735	67418500	2141	-0.113077	0.0645348	-1.75219	0.0797406	0.330018	TRUE	TRUE	not-induced	'1-2	2484	1973	3016	1551	2501	2939	2903	2362.07	2023.87	2223.56	2168.53	2294.86	2167.75	1615.3
chr15	69702634	69703134	1586.47	-0.187299	0.168298	-1.1129	0.265751	0.601903	FALSE	FALSE	inactive	'1-2	2361	1655	2645	1240	2661	3242	3984	2245.11	1697.67	1950.03	1733.71	2441.67	2391.23	2216.8
chr15	70275338	70275834	357.613	-0.0641485	0.133279	-0.48131	0.630296	0.844005	FALSE	FALSE	inactive	'1-2	519	426	564	327	445	502	823	493.524	436.984	415.811	457.196	408.322	370.265	457.937
chr15	72752639	72753139	189.353	-0.147668	0.11995	-1.23107	0.218295	0.552222	FALSE	FALSE	inactive	'1-2	239	237	344	138	243	271	528	227.268	243.111	253.615	192.945	222.971	199.884	293.792
chr15	74493191	74493718	3481.77	-0.0376416	0.203854	-0.184649	0.853504	0.944003	TRUE	TRUE	not-induced	'1-2	4590	3583	5923	3480	6819	8214	1985	4364.69	3675.39	4366.75	4865.57	6256.96	6058.48	1104.5
chr15	74533657	74533999	2451.56	-0.0806142	0.134175	-0.600812	0.547965	0.806168	FALSE	FALSE	inactive	'1-2	3570	2785	3896	2103	2988	3692	5410	3394.76	2856.81	2872.34	2940.31	2741.72	2723.14	3010.26
chr15	74934453	74935216	10380.6	-0.391083	0.433443	-0.90227	0.366913	0.693064	TRUE	TRUE	not-induced	'1-2	2875	1792	4852	1939	3950	4104	1859	2733.88	1838.21	3577.15	2711.02	3624.43	3027.03	1034.39
chr15	79603410	79603910	6711.21	-0.0713675	0.108943	-0.655088	0.512411	0.786072	TRUE	TRUE	not-induced	'1-2	5287	4497	6973	3428	5200	6526	4089	5027.48	4612.95	5140.87	4792.86	4771.4	4813.44	2275.22
chr15	81062759	81063259	475.811	-0.126082	0.104619	-1.20515	0.228144	0.564107	FALSE	FALSE	inactive	'1-2	550	518	713	346	589	602	1029	523.002	531.356	525.662	483.76	540.453	444.023	572.561
chr15	81384372	81384755	349.089	0.380113	0.147505	2.57695	0.00996766	0.071924	FALSE	TRUE	not-induced	'1-2	221	230	268	171	197	389	374	210.152	235.93	197.584	239.084	180.763	286.918	208.103
chr15	89181876	89182253	28959.6	-0.102559	0.137771	-0.744412	0.456627	0.750997	TRUE	TRUE	not-induced	'1-2	72630	53350	79828	46927	86538	98642	3784	69064.9	54725.6	58853.5	65611.1	79405.3	72756.3	2105.51
chr15	89630887	89631921	5415.98	-0.064539	0.0631678	-1.02171	0.30692	0.643497	TRUE	TRUE	not-induced	'1-2	5875	5141	7682	3940	6218	7367	7951	5586.62	5273.56	5663.58	5508.72	5705.5	5433.75	4424.13
chr15	89634121	89634621	291.127	0.0600221	0.119346	0.502925	0.615017	0.836589	FALSE	FALSE	inactive	'1-2	291	314	390	181	292	392	560	276.716	322.096	287.529	253.065	267.933	289.131	311.598
chr15	91191754	91192119	41.1264	0.171204	0.342907	0.499271	0.617588	0.838306	TRUE	TRUE	not-induced	'1-2	49	54	44	17	51	80	74	46.5948	55.3924	32.4391	23.7686	46.7964	59.0064	41.1754
chr15	91534992	91535492	773.856	0.121994	0.0834436	1.46199	0.143744	0.453631	FALSE	FALSE	inactive	'1-2	921	906	1098	630	845	1176	2034	875.791	929.361	809.504	880.835	775.353	867.394	1131.77
chr15	91855151	91855651	306.007	0.141679	0.136893	1.03496	0.300686	0.637774	FALSE	FALSE	inactive	'1-2	268	330	428	235	292	359	663	254.845	338.509	315.544	328.566	267.933	264.791	368.909
chr15	96704070	96704470	149.808	-0.185283	0.152288	-1.21666	0.223734	0.558721	FALSE	FALSE	inactive	'1-2	146	126	197	83	151	170	307	138.833	129.249	145.239	116.047	138.554	125.389	170.822
chr15	96883863	96884363	1987.86	0.103106	0.122943	0.838644	0.401669	0.718766	TRUE	TRUE	not-induced	'1-2	734	737	1041	562	770	1074	790	697.971	756.003	767.481	785.761	706.535	792.16	439.575
chr15	100850096	100850596	982.193	-0.0751198	0.0840762	-0.893472	0.371604	0.697264	TRUE	TRUE	not-induced	'1-2	1318	1115	1480	791	1252	1445	1946	1253.3	1143.75	1091.13	1105.94	1148.81	1065.8	1082.8
chr15	101548527	101549027	2718.01	-0.0655405	0.0814522	-0.804649	0.421022	0.730501	TRUE	TRUE	not-induced	'1-2	2209	1938	2935	1362	2183	2836	3226	2100.57	1987.97	2163.84	1904.28	2003.07	2091.78	1795.03
chr15	102264138	102264638	5445.22	-0.0831639	0.0894563	-0.929659	0.352547	0.68162	TRUE	TRUE	not-induced	'1-2	4220	3399	5287	2637	4271	5408	5650	4012.86	3486.64	3897.86	3686.93	3918.97	3988.83	3143.8
chr15	102520922	102521422	194.509	0.227012	0.152429	1.4893	0.136409	0.441142	FALSE	FALSE	inactive	'1-2	234	241	205	138	189	267	1118	222.514	247.214	151.137	192.945	173.422	196.934	622.083
chr16	366708	367135	12201.8	1.32262	0.139509	9.48056	2.52934e-21	1.10265e-19	TRUE	TRUE	induced	'1-2	13258	34040	18387	26569	20138	53673	3015	12607.2	34917.7	13555.9	37147.5	18478.2	39588.1	1677.62
chr16	373766	374266	2450.27	-0.092647	0.0740096	-1.25183	0.210634	0.543905	FALSE	FALSE	inactive	'1-2	3230	2807	3943	1960	2955	3437	5429	3071.45	2879.38	2906.99	2740.38	2711.44	2535.06	3020.83
chr16	642336	643949	12438.8	-0.0108817	0.0755874	-0.143962	0.885531	0.956938	TRUE	TRUE	not-induced	'1-2	11762	9936	15178	8512	12665	15794	5102	11184.6	10192.2	11190	11901.1	11621.1	11649.3	2838.88
chr16	686361	687853	3920.37	-0.0921937	0.0944042	-0.976584	0.328775	0.662109	TRUE	TRUE	not-induced	'1-2	3576	3066	4330	2140	3416	4050	4887	3400.47	3145.06	3192.31	2992.04	3134.44	2987.2	2719.25
chr16	841123	841623	6853.95	-0.187021	0.120465	-1.55249	0.120544	0.415853	TRUE	TRUE	not-induced	'1-2	4105	3044	5015	2376	4024	4710	5249	3903.5	3122.49	3697.33	3322.01	3692.33	3474	2920.67
chr16	1036144	1036644	1310.1	-0.0953104	0.101719	-0.937001	0.348758	0.677967	TRUE	TRUE	not-induced	'1-2	1320	1191	1774	807	1284	1562	1940	1255.21	1221.71	1307.89	1128.31	1178.17	1152.1	1079.46
chr16	1159478	1159978	3924	-0.0837326	0.0917411	-0.912706	0.361397	0.687596	TRUE	TRUE	not-induced	'1-2	4337	3649	5574	2817	4374	5255	3823	4124.11	3743.09	4109.45	3938.59	4013.48	3875.98	2127.21
chr16	1299044	1299544	788.592	0.00160245	0.108041	0.0148318	0.988166	0.9966	FALSE	FALSE	inactive	'1-2	566	599	856	442	670	758	1331	538.217	614.445	631.089	617.983	614.777	559.085	740.601
chr16	1354103	1354603	841.184	-0.0927393	0.0823244	-1.12651	0.25995	0.597661	TRUE	TRUE	not-induced	'1-2	759	632	905	436	718	890	1121	721.743	648.296	667.214	609.594	658.821	656.446	623.752
chr16	1646417	1646917	694.44	-0.172698	0.0975255	-1.7708	0.0765947	0.322126	TRUE	TRUE	not-induced	'1-2	805	685	878	419	805	834	899	765.485	702.663	647.308	585.825	738.65	615.141	500.226
chr16	1889540	1890040	870.832	0.043183	0.267053	0.161702	0.871541	0.951906	FALSE	FALSE	inactive	'1-2	301	256	293	193	270	326	518	286.225	262.601	216.015	269.843	247.746	240.451	288.228
chr16	2147158	2147658	3834.92	-0.0881612	0.0731227	-1.20566	0.227948	0.563804	TRUE	TRUE	not-induced	'1-2	4210	3443	4958	2506	4197	5129	5959	4003.35	3531.78	3655.3	3503.77	3851.07	3783.05	3315.73
chr16	2802069	2802878	32459	-0.102648	0.151919	-0.675677	0.499246	0.777977	TRUE	TRUE	not-induced	'1-2	23364	15930	25163	14221	22299	28199	5207	22217.1	16340.8	18551.5	19883.1	20461.1	20799	2897.3
chr16	2835424	2835924	4751.93	-0.0587863	0.0725165	-0.810662	0.41756	0.728933	TRUE	TRUE	not-induced	'1-2	5670	4994	7148	3457	5347	6762	6587	5391.68	5122.77	5269.89	4833.41	4906.29	4987.51	3665.17
chr16	3062755	3063255	2283.27	-0.0453062	0.0889762	-0.509194	0.610616	0.834563	TRUE	TRUE	not-induced	'1-2	3288	2642	3687	2143	3341	3969	3161	3126.6	2710.12	2718.25	2996.24	3065.63	2927.45	1758.86
chr16	3740474	3740974	545.79	0.0224146	0.0907059	0.247113	0.804821	0.922346	TRUE	TRUE	not-induced	'1-2	635	676	906	441	772	943	1104	603.83	693.43	667.951	616.585	708.37	695.537	614.293
chr16	4231688	4232188	168.511	-0.0925358	0.159796	-0.579086	0.562531	0.812148	FALSE	FALSE	inactive	'1-2	150	166	268	121	203	213	403	142.637	170.28	197.584	169.176	186.268	157.104	224.239
chr16	4278778	4279278	482.856	-0.132404	0.0933512	-1.41834	0.156091	0.470379	FALSE	FALSE	inactive	'1-2	565	503	769	351	629	711	1067	537.266	515.97	566.948	490.751	577.156	524.419	593.705
chr16	4462778	4463278	580.3	-0.159821	0.0936744	-1.70614	0.0879827	0.34956	FALSE	FALSE	inactive	'1-2	672	636	863	397	733	728	1337	639.014	652.399	636.25	555.066	672.584	536.958	743.94
chr16	4497352	4497852	3283.85	-0.12554	0.0869237	-1.44425	0.148668	0.460629	TRUE	FALSE	not-induced	'1-2	3891	3027	4567	2260	3524	4306	6040	3700	3105.05	3367.04	3159.82	3233.54	3176.02	3360.8
chr16	8754673	8755173	517.055	-0.130132	0.112025	-1.16163	0.245386	0.58156	FALSE	FALSE	inactive	'1-2	493	380	592	270	526	665	1784	468.8	389.798	436.454	377.501	482.646	490.49	992.661
chr16	9245035	9245534	123.366	0.131148	0.181918	0.720922	0.470958	0.760366	FALSE	FALSE	inactive	'1-2	114	103	133	77	118	174	249	108.404	105.656	98.0547	107.658	108.274	128.339	138.55
chr16	10248180	10248680	359.725	-0.194606	0.0946502	-2.05605	0.0397772	0.212058	FALSE	FALSE	inactive	'1-2	443	382	566	279	512	493	788	421.255	391.85	417.285	390.084	469.8	363.627	438.462
chr16	11047799	11048299	920.436	-0.17454	0.0947068	-1.84295	0.0653367	0.293605	FALSE	FALSE	inactive	'1-2	1045	780	1410	707	1224	1366	2547	993.705	800.112	1039.53	988.493	1123.11	1007.53	1417.21
chr16	11443198	11443698	927.435	-0.146111	0.102189	-1.42982	0.152768	0.465731	TRUE	FALSE	not-induced	'1-2	1030	779	1158	541	992	1239	1505	979.441	799.086	853.739	756.4	910.237	913.861	837.419
chr16	12999649	13000149	383.25	0.0184576	0.109094	0.169189	0.865648	0.950464	FALSE	FALSE	inactive	'1-2	440	428	596	267	432	613	1019	418.402	439.036	439.403	373.306	396.393	452.136	566.997
chr16	13221287	13221787	259.323	-0.155309	0.155926	-0.996042	0.31923	0.654151	FALSE	FALSE	inactive	'1-2	251	234	338	171	318	301	1207	238.679	240.034	249.192	239.084	291.79	222.011	671.604
chr16	14166323	14166823	450.047	-0.057271	0.105309	-0.54384	0.586552	0.822749	FALSE	FALSE	inactive	'1-2	668	531	756	433	612	731	1346	635.21	544.692	557.363	605.4	561.557	539.171	748.947
chr16	15743789	15744274	724.511	0.0513449	0.271636	0.189021	0.850076	0.941975	TRUE	TRUE	not-induced	'1-2	753	879	1151	434	829	1219	1202	716.038	901.665	848.579	606.798	760.672	899.109	668.822
chr16	19285272	19286131	256.559	-0.138575	0.140269	-0.987922	0.323191	0.657557	FALSE	FALSE	inactive	'1-2	358	330	380	179	354	362	580	340.427	338.509	280.156	250.269	324.822	267.004	322.726
chr16	19528649	19529149	339.235	-0.35845	0.129972	-2.7579	0.00581736	0.04543	TRUE	TRUE	not-induced	'1-2	787	534	756	371	733	646	606	748.369	547.769	557.363	518.714	672.584	476.476	337.193
chr16	19813257	19813688	81.4932	0.152765	0.185912	0.821708	0.411243	0.7252	FALSE	FALSE	inactive	'1-2	62	84	109	55	74	95	231	58.9566	86.1659	80.3606	76.8983	67.9007	70.0701	128.534
chr16	21522964	21524282	52046.6	0.68562	0.136703	5.0154	5.29233e-07	7.4264e-06	TRUE	TRUE	not-induced	'1-2	17073	26794	21761	19480	19955	36125	22540	16234.9	27484.9	16043.4	27236	18310.3	26645.1	12541.8
chr16	22344924	22345424	314.235	-0.299927	0.137705	-2.17804	0.0294033	0.170286	FALSE	FALSE	inactive	'1-2	284	222	371	158	312	305	721	270.059	227.724	273.521	220.908	286.284	224.962	401.182
chr16	23307148	23307597	452.648	-0.0868959	0.142436	-0.610068	0.541817	0.801645	FALSE	FALSE	inactive	'1-2	418	272	565	322	373	496	847	397.482	279.013	416.548	450.205	342.256	365.839	471.292
chr16	23607519	23607842	15799.4	-0.0168274	0.113917	-0.147716	0.882567	0.955405	TRUE	TRUE	not-induced	'1-2	9246	7622	12124	6748	8867	11279	4476	8792.15	7818.53	8938.46	9434.73	8136.16	8319.16	2490.56
chr16	23814794	23815294	282.873	-0.157841	0.11247	-1.4034	0.160496	0.476425	FALSE	FALSE	inactive	'1-2	372	290	465	188	351	466	939	353.74	297.478	342.823	262.852	322.07	343.712	522.483
chr16	27269621	27270028	309.034	-0.236504	0.126384	-1.87132	0.0613007	0.283093	TRUE	TRUE	not-induced	'1-2	384	288	441	234	475	449	526	365.151	295.426	325.129	327.167	435.849	331.173	292.679
chr16	29690895	29691960	1373.56	-0.0585287	0.0860118	-0.680473	0.496205	0.776076	FALSE	FALSE	inactive	'1-2	1140	992	1473	722	1162	1460	2174	1084.04	1017.58	1085.97	1009.47	1066.22	1076.87	1209.67
chr16	30539096	30539596	492.567	0.0295332	0.0985794	0.299588	0.764492	0.904972	TRUE	TRUE	not-induced	'1-2	640	584	741	424	639	792	905	608.585	599.058	546.305	592.816	586.332	584.163	503.564
chr16	30620749	30621249	4115.49	-0.0768608	0.0827031	-0.929357	0.352704	0.68162	TRUE	FALSE	not-induced	'1-2	2526	2101	3271	1744	2727	3180	4276	2402.01	2155.17	2411.56	2438.38	2502.23	2345.5	2379.27
chr16	30671174	30671674	2521.98	0.0904982	0.168722	0.536375	0.591699	0.82534	TRUE	TRUE	not-induced	'1-2	1231	1377	1834	793	1452	2140	1584	1170.57	1412.51	1352.12	1108.73	1332.32	1578.42	881.376
chr16	31144424	31144924	1614.18	-0.0746344	0.0770559	-0.968574	0.332758	0.665251	FALSE	FALSE	inactive	'1-2	1416	1246	1761	882	1455	1715	5036	1346.49	1278.13	1298.3	1233.17	1335.08	1264.95	2802.15
chr16	32876611	32877111	924.817	-0.145747	0.0896737	-1.62531	0.104098	0.384028	TRUE	TRUE	not-induced	'1-2	1071	890	1387	624	1002	1207	1539	1018.43	912.948	1022.57	872.447	919.413	890.258	856.337
chr16	33380679	33381179	498.314	-0.139	0.100122	-1.38831	0.165043	0.482038	FALSE	FALSE	inactive	'1-2	556	431	740	351	614	745	1547	528.708	442.113	545.567	490.751	563.393	549.497	860.789
chr16	34793980	34794480	623.591	0.119115	0.119793	0.99434	0.320057	0.655101	FALSE	FALSE	inactive	'1-2	758	743	941	551	815	1103	1732	720.792	762.158	693.755	770.381	747.826	813.55	963.727
chr16	34922224	34922724	168.197	-0.171623	0.23035	-0.74505	0.456241	0.750852	FALSE	FALSE	inactive	'1-2	164	136	179	85	170	182	355	155.95	139.507	131.968	118.843	155.988	134.239	197.531
chr16	48068919	48069419	191.148	0.12307	0.125137	0.983481	0.325371	0.65995	FALSE	FALSE	inactive	'1-2	220	236	285	168	225	282	797	209.201	242.085	210.117	234.889	206.455	207.997	443.47
chr16	49037855	49038355	525.062	-0.0686685	0.120101	-0.571754	0.567488	0.81373	TRUE	FALSE	not-induced	'1-2	657	555	743	435	600	640	991	624.75	569.311	547.779	608.196	550.546	472.051	551.417
chr16	53807085	53807585	210.39	-0.112789	0.144792	-0.778975	0.435994	0.738063	FALSE	FALSE	inactive	'1-2	181	187	259	105	177	201	1369	172.115	191.822	190.949	146.806	162.411	148.253	761.745
chr16	61023355	61023855	48.5384	-0.289535	0.249334	-1.16123	0.245547	0.581786	FALSE	FALSE	inactive	'1-2	53	50	104	29	45	63	145	50.3984	51.2892	76.6743	40.5464	41.291	46.4675	80.6815
chr16	67397183	67397778	214.038	-0.0995802	0.142324	-0.699674	0.484131	0.767949	FALSE	FALSE	inactive	'1-2	209	197	293	113	218	283	625	198.741	202.08	216.015	157.991	200.032	208.735	347.765
chr16	67477067	67477608	1359.53	-0.176376	0.122768	-1.43666	0.150815	0.463067	FALSE	FALSE	inactive	'1-2	1255	1042	1578	718	1124	1258	2129	1193.4	1068.87	1163.39	1003.87	1031.36	927.875	1184.63
chr16	68309855	68310355	134.581	0.0203206	0.163659	0.124164	0.901186	0.963585	TRUE	TRUE	not-induced	'1-2	133	120	168	102	127	150	177	126.472	123.094	123.859	142.611	116.532	110.637	98.4871
chr16	69430086	69431039	285.029	-0.188709	0.149278	-1.26415	0.206175	0.539984	FALSE	FALSE	inactive	'1-2	234	204	360	162	340	357	707	222.514	209.26	265.411	226.501	311.976	263.316	393.392
chr16	75374370	75375117	159.875	0.0669986	0.191705	0.349489	0.726722	0.88861	FALSE	FALSE	inactive	'1-2	180	102	188	132	149	242	360	171.164	104.63	138.604	184.556	136.719	178.494	200.313
chr16	77932494	77932994	416.263	-0.113351	0.121573	-0.93237	0.351146	0.680356	FALSE	FALSE	inactive	'1-2	521	443	539	254	490	575	1165	495.426	454.423	397.38	355.13	449.613	424.108	648.234
chr16	79238372	79238775	332.706	0.376258	0.116356	3.23367	0.00122209	0.011362	TRUE	TRUE	not-induced	'1-2	292	339	392	278	273	449	394	277.667	347.741	289.003	388.686	250.499	331.173	219.231
chr16	81681162	81681662	567.778	-0.146861	0.145167	-1.01167	0.311697	0.647463	FALSE	FALSE	inactive	'1-2	710	536	966	502	907	1019	1846	675.149	549.821	712.187	701.872	832.243	751.594	1027.16
chr16	83835725	83836769	1047.36	-0.198597	0.0861655	-2.30484	0.0211758	0.132166	TRUE	TRUE	not-induced	'1-2	1689	1247	2016	1015	1631	1769	2059	1606.09	1279.15	1486.3	1419.12	1496.57	1304.78	1145.68
chr16	84066755	84067255	883.283	0.0426763	0.0894696	0.476993	0.633367	0.845613	FALSE	FALSE	inactive	'1-2	866	777	1068	603	938	1221	1939	823.491	797.035	787.386	843.085	860.688	900.585	1078.91
chr16	84245255	84245755	201.393	-0.0791568	0.151708	-0.52177	0.601831	0.830696	FALSE	FALSE	inactive	'1-2	258	248	318	133	321	385	530	245.336	254.395	234.447	185.954	294.542	283.968	294.905
chr16	85345372	85346733	5993.21	0.0508648	0.0880055	0.577972	0.563283	0.812546	TRUE	TRUE	not-induced	'1-2	6766	6464	8368	4704	6281	7897	10565	6433.88	6630.67	6169.34	6576.9	5763.3	5824.67	5878.62
chr16	85383152	85385050	4321.88	-0.131854	0.0797864	-1.65259	0.0984153	0.372335	TRUE	TRUE	not-induced	'1-2	5533	4467	6491	3181	5104	5983	7350	5261.4	4582.18	4785.51	4447.52	4683.31	4412.94	4089.72
chr16	85492499	85496049	5083.55	-0.102087	0.0704718	-1.44863	0.147442	0.458806	TRUE	TRUE	not-induced	'1-2	5816	4961	7269	3646	5723	6583	8310	5530.51	5088.92	5359.09	5097.66	5251.3	4855.49	4623.89
chr16	85724123	85724623	799.043	-0.0244367	0.100236	-0.243791	0.807393	0.923371	FALSE	FALSE	inactive	'1-2	944	976	1435	620	1029	1329	1746	897.662	1001.17	1057.96	866.854	944.187	980.243	971.517
chr16	88099433	88099933	1194.02	-0.105242	0.0886824	-1.18673	0.235335	0.570296	TRUE	TRUE	not-induced	'1-2	1037	1010	1525	766	1254	1266	1441	986.097	1036.04	1124.31	1070.98	1150.64	933.776	801.808
chr17	597417	597837	855.285	0.573658	0.180834	3.17229	0.00151243	0.013801	TRUE	TRUE	not-induced	'1-2	930	1565	1592	1178	1316	2182	424	884.35	1605.35	1173.71	1647.02	1207.53	1609.4	235.924
chr17	1508015	1508598	3808.5	0.321647	0.0815439	3.94447	7.99782e-05	0.000904753	TRUE	TRUE	not-induced	'1-2	3657	3932	4403	3062	3605	5724	4278	3477.49	4033.39	3246.13	4281.14	3307.87	4221.91	2380.38
chr17	1895806	1896306	946.878	-0.107701	0.103217	-1.04344	0.296746	0.633972	TRUE	FALSE	not-induced	'1-2	1154	967	1352	604	1155	1463	1774	1097.35	991.934	996.766	844.483	1059.8	1079.08	987.097
chr17	2356587	2357087	346.526	-0.203228	0.112037	-1.81393	0.0696884	0.304915	TRUE	TRUE	not-induced	'1-2	472	386	693	297	515	587	738	448.831	395.953	510.917	415.251	472.552	432.959	410.641
chr17	2715201	2715876	1265.62	-0.100132	0.0998011	-1.00332	0.315708	0.651352	TRUE	TRUE	not-induced	'1-2	1802	1410	2089	1116	1735	2053	2590	1713.55	1446.36	1540.12	1560.34	1592	1514.25	1441.14
chr17	2764332	2764832	1076.59	-0.106191	0.10623	-0.999634	0.317488	0.652462	FALSE	FALSE	inactive	'1-2	1323	1109	1653	831	1365	1579	2748	1258.06	1137.6	1218.68	1161.86	1252.49	1164.64	1529.05
chr17	4064435	4066531	2239.33	-0.0931778	0.157258	-0.592514	0.553507	0.808254	FALSE	FALSE	inactive	'1-2	1818	1628	2470	1176	2034	2389	4212	1728.76	1669.98	1821.02	1644.23	1866.35	1762.08	2343.66
chr17	4595126	4595626	226.868	-0.0941949	0.197297	-0.477428	0.633058	0.845362	FALSE	FALSE	inactive	'1-2	232	184	277	167	270	283	749	220.612	188.744	204.219	233.491	247.746	208.735	416.762
chr17	4848575	4849075	2399.99	-0.161655	0.211077	-0.765857	0.443761	0.743188	TRUE	TRUE	not-induced	'1-2	4143	3344	6495	3339	7974	8463	1099	3939.63	3430.22	4788.46	4668.43	7316.76	6242.14	611.51
chr17	4889906	4890406	2117.71	-0.193301	0.0912648	-2.11803	0.0341726	0.190575	TRUE	TRUE	not-induced	'1-2	2871	2051	3107	1584	2530	2852	3518	2730.07	2103.88	2290.65	2214.67	2321.47	2103.58	1957.5
chr17	5875201	5875701	298.052	-0.0637642	0.141116	-0.451855	0.651373	0.854445	FALSE	FALSE	inactive	'1-2	241	243	327	152	271	305	622	229.17	249.266	241.082	212.519	248.663	224.962	346.096
chr17	6926840	6927340	2276.06	-0.128779	0.0743339	-1.73244	0.0831956	0.337967	TRUE	TRUE	not-induced	'1-2	2465	1878	2890	1537	2459	2822	3268	2344	1926.42	2130.66	2148.96	2256.32	2081.45	1818.4
chr17	7254827	7255665	33657.9	0.21596	0.211747	1.0199	0.307778	0.64435	TRUE	TRUE	not-induced	'1-2	19651	22353	30652	17142	25813	38726	6063	18686.4	22929.4	22598.3	23967.1	23685.4	28563.5	3373.6
chr17	7919156	7919656	3411.73	-0.128764	0.0872767	-1.47535	0.140118	0.447739	FALSE	FALSE	inactive	'1-2	3692	2814	4150	2249	3568	4032	6198	3510.77	2886.56	3059.6	3144.44	3273.92	2973.92	3448.72
chr17	9574553	9575266	337.816	-0.0128573	0.115215	-0.111594	0.911145	0.966042	FALSE	FALSE	inactive	'1-2	302	286	377	213	355	395	963	287.176	293.374	277.944	297.806	325.74	291.344	535.837
chr17	9872151	9872623	464.014	-0.022888	0.119264	-0.19191	0.847813	0.940341	TRUE	TRUE	not-induced	'1-2	674	601	915	484	681	841	667	640.916	616.497	674.587	676.705	624.87	620.304	371.135
chr17	11208057	11208477	457.659	0.44686	0.104337	4.28287	1.84499e-05	0.000222629	TRUE	TRUE	not-induced	'1-2	476	643	616	446	474	747	640	452.635	659.58	454.148	623.576	434.932	550.972	356.112
chr17	13090937	13091437	11.4882	-0.0197117	0.529139	-0.0372524	0.970284	0.990318	TRUE	TRUE	not-induced	'1-2	20	26	34	7	5	16	22	19.0183	26.6704	25.0666	9.78706	4.58789	11.8013	12.2413
chr17	17460843	17461686	2373.48	-0.113991	0.102495	-1.11216	0.26607	0.602269	TRUE	FALSE	not-induced	'1-2	2867	2313	3464	1659	2530	3161	4337	2726.27	2372.64	2553.85	2319.53	2321.47	2331.49	2413.21
chr17	17689468	17689801	363.289	0.113319	0.116055	0.976425	0.328854	0.662109	FALSE	FALSE	inactive	'1-2	357	393	423	247	355	421	856	339.476	403.133	311.858	345.343	325.74	310.521	476.299
chr17	17719531	17720031	4252.41	-0.201042	0.0841002	-2.3905	0.0168252	0.110664	TRUE	TRUE	not-induced	'1-2	5425	4098	6449	3066	4671	5244	7292	5158.71	4203.67	4754.55	4286.73	4286	3867.87	4057.45
chr17	18165931	18166431	1180.24	-0.18536	0.073943	-2.5068	0.0121831	0.0849719	FALSE	FALSE	inactive	'1-2	1236	942	1567	773	1297	1425	2977	1175.33	966.289	1155.28	1080.77	1190.1	1051.05	1656.48
chr17	19410981	19411481	2272.74	-0.119614	0.16436	-0.727756	0.466763	0.757979	FALSE	FALSE	inactive	'1-2	2726	1964	3479	1764	2798	3563	5853	2592.19	2014.64	2564.9	2466.34	2567.38	2628	3256.75
chr17	19913207	19913707	1459.26	-0.0545175	0.0905284	-0.602214	0.547032	0.805728	TRUE	TRUE	not-induced	'1-2	1773	1538	2265	1167	1714	2088	2262	1685.97	1577.66	1669.88	1631.64	1572.73	1540.07	1258.63
chr17	26384921	26385421	120.775	-0.161612	0.144638	-1.11735	0.263843	0.600464	FALSE	FALSE	inactive	'1-2	144	112	183	99	172	178	349	136.932	114.888	134.917	138.417	157.823	131.289	194.192
chr17	26885120	26885620	199.245	-0.120416	0.140205	-0.858852	0.390422	0.710803	FALSE	FALSE	inactive	'1-2	192	189	310	141	244	264	476	182.575	193.873	228.549	197.139	223.889	194.721	264.858
chr17	27918757	27919257	722.192	-0.0376699	0.0864039	-0.435975	0.662855	0.860556	TRUE	TRUE	not-induced	'1-2	689	570	885	459	706	916	1125	655.179	584.697	652.469	641.752	647.81	675.623	625.978
chr17	28299165	28299752	1305.41	-0.123882	0.0843079	-1.4694	0.141724	0.449996	TRUE	TRUE	not-induced	'1-2	1009	899	1234	575	1033	1158	1336	959.472	922.18	909.771	803.937	947.857	854.117	743.383
chr17	30294714	30295214	210.273	-0.0586029	0.155017	-0.378041	0.7054	0.878999	FALSE	FALSE	inactive	'1-2	313	226	312	172	247	339	481	297.636	231.827	230.023	240.482	226.642	250.039	267.64
chr17	30334981	30335481	917.315	0.214564	0.253588	0.846112	0.39749	0.716263	FALSE	TRUE	not-induced	'1-2	676	1049	1388	495	987	1645	1619	642.818	1076.05	1023.31	692.085	905.649	1213.32	900.851
chr17	30644267	30644767	656.645	-0.0893982	0.0877452	-1.01884	0.30828	0.644929	FALSE	FALSE	inactive	'1-2	755	582	911	472	711	897	1595	717.94	597.007	671.638	659.927	652.398	661.609	887.497
chr17	32602866	32603366	356.203	-0.30297	0.120264	-2.51921	0.0117618	0.082402	FALSE	FALSE	inactive	'1-2	401	346	555	210	472	460	760	381.316	354.922	409.176	293.612	433.097	339.287	422.883
chr17	32677901	32678401	296.983	-0.348963	0.147636	-2.36368	0.0180946	0.116356	FALSE	FALSE	inactive	'1-2	312	178	313	147	302	324	486	296.685	182.59	230.76	205.528	277.108	238.976	270.422
chr17	32720369	32720869	334.614	-0.0185956	0.095291	-0.195146	0.845279	0.939206	FALSE	FALSE	inactive	'1-2	364	343	467	246	424	496	910	346.133	351.844	344.297	343.945	389.053	365.839	506.346
chr17	33373622	33374122	173.821	-0.057756	0.144836	-0.398767	0.690065	0.872035	TRUE	TRUE	not-induced	'1-2	219	188	260	125	248	310	346	208.25	192.848	191.686	174.769	227.559	228.65	192.523
chr17	34838781	34839281	3620.13	-0.090757	0.0816722	-1.11123	0.266467	0.602501	TRUE	TRUE	not-induced	'1-2	4827	4167	5872	2845	4641	5584	5298	4590.06	4274.44	4329.15	3977.74	4258.48	4118.64	2947.94
chr17	35810254	35811429	229.846	-0.149982	0.120716	-1.24243	0.214077	0.547625	FALSE	FALSE	inactive	'1-2	213	181	254	109	194	231	441	202.545	185.667	187.262	152.399	178.01	170.381	245.383
chr17	37644861	37645361	163.406	-0.0602514	0.1422	-0.423709	0.671778	0.864231	FALSE	FALSE	inactive	'1-2	177	181	262	111	206	250	371	168.312	185.667	193.16	155.195	189.021	184.395	206.433
chr17	37964799	37965216	72.7516	-0.102171	0.201596	-0.506808	0.61229	0.835343	FALSE	FALSE	inactive	'1-2	60	51	59	37	58	55	401	57.0548	52.315	43.4979	51.7316	53.2195	40.5669	223.126
chr17	38085498	38085969	910.263	-0.270294	0.190708	-1.41731	0.156391	0.470927	TRUE	TRUE	not-induced	'1-2	1247	835	1251	628	1269	1324	1147	1185.79	856.53	922.304	878.039	1164.41	976.555	638.219
chr17	38620156	38620656	1232.51	-0.0543949	0.0970211	-0.56065	0.575036	0.817746	FALSE	FALSE	inactive	'1-2	1203	1047	1426	752	1281	1513	4586	1143.95	1074	1051.32	1051.41	1175.42	1115.96	2551.76
chr17	38654324	38656256	1402.01	-0.157877	0.113609	-1.38966	0.164634	0.481508	FALSE	FALSE	inactive	'1-2	1463	1299	2105	930	1600	1792	2859	1391.19	1332.49	1551.92	1300.28	1468.12	1321.74	1590.82
chr17	38697142	38699555	3457.77	-0.0903528	0.0698602	-1.29334	0.195894	0.526689	FALSE	FALSE	inactive	'1-2	3902	3289	4995	2366	3928	4934	7790	3710.46	3373.81	3682.58	3308.03	3604.24	3639.22	4334.55
chr17	38842408	38842814	50.846	-0.171102	0.243396	-0.70298	0.482068	0.766821	FALSE	FALSE	inactive	'1-2	40	41	74	26	38	49	204	38.0365	42.0572	54.5567	36.3519	34.8679	36.1414	113.511
chr17	39485481	39485981	1061.62	-0.139936	0.0699988	-1.99912	0.0455954	0.233315	TRUE	FALSE	not-induced	'1-2	1373	1076	1590	828	1352	1510	2069	1305.6	1103.74	1172.23	1157.67	1240.56	1113.75	1151.24
chr17	40074141	40074641	1647.46	-0.0960494	0.0806749	-1.19057	0.233821	0.569187	TRUE	TRUE	not-induced	'1-2	1851	1468	2174	1088	1622	2049	1933	1760.14	1505.85	1602.79	1521.19	1488.31	1511.3	1075.57
chr17	41478640	41479140	1203.3	-0.158634	0.101654	-1.56053	0.118634	0.411535	TRUE	FALSE	not-induced	'1-2	899	746	1114	513	956	1084	1465	854.871	765.235	821.3	717.252	877.204	799.536	815.162
chr17	41605806	41606306	638.996	-0.075922	0.0893045	-0.850148	0.395243	0.714395	FALSE	FALSE	inactive	'1-2	569	569	770	345	642	731	1432	541.07	583.671	567.685	482.362	589.085	539.171	796.8
chr17	41747291	41747791	513.132	-0.056072	0.118654	-0.472567	0.636522	0.8469	FALSE	FALSE	inactive	'1-2	248	228	338	162	265	324	551	235.827	233.879	249.192	226.501	243.158	238.976	306.59
chr17	41976542	41978254	2156.27	-0.102603	0.0773949	-1.3257	0.184938	0.513712	TRUE	FALSE	not-induced	'1-2	2279	1991	2837	1406	2504	2836	3807	2167.13	2042.34	2091.59	1965.8	2297.61	2091.78	2118.31
chr17	42287805	42288324	21103.9	0.445727	0.124225	3.58806	0.000333144	0.00343201	TRUE	TRUE	not-induced	'1-2	8588	10374	10567	8294	9022	14605	3332	8166.45	10641.5	7790.56	11596.3	8278.38	10772.3	1854.01
chr17	43248501	43249001	1860.8	-0.173108	0.0922494	-1.87652	0.0605837	0.281353	TRUE	TRUE	not-induced	'1-2	1718	1271	1859	975	1581	1742	1918	1633.67	1303.77	1370.55	1363.2	1450.69	1284.86	1067.22
chr17	43384624	43385015	90.0803	-0.131123	0.173749	-0.754672	0.450446	0.746752	FALSE	FALSE	inactive	'1-2	120	77	119	76	106	121	221	114.11	78.9854	87.7331	106.26	97.2632	89.2471	122.97
chr17	44048156	44048656	337.647	-0.108582	0.118173	-0.918844	0.358177	0.685252	TRUE	FALSE	not-induced	'1-2	418	368	477	245	446	477	686	397.482	377.489	351.67	342.547	409.24	351.825	381.707
chr17	47171691	47172191	107.52	-0.200079	0.252187	-0.793377	0.427558	0.734174	FALSE	FALSE	inactive	'1-2	144	57	105	81	112	141	373	136.932	58.4697	77.4116	113.25	102.769	103.999	207.546
chr17	47599841	47600341	770.619	-0.223518	0.114015	-1.96042	0.0499464	0.247208	FALSE	FALSE	inactive	'1-2	804	610	950	431	738	821	1429	764.534	625.729	700.391	602.603	677.172	605.553	795.131
chr17	47645431	47645931	1702.7	-0.103603	0.0731751	-1.41582	0.156829	0.471704	TRUE	TRUE	not-induced	'1-2	2030	1798	2585	1198	2154	2549	2379	1930.35	1844.36	1905.8	1674.99	1976.46	1880.09	1323.73
chr17	47875660	47876078	471.588	0.254492	0.114026	2.23189	0.0256222	0.154197	TRUE	TRUE	not-induced	'1-2	557	687	842	496	691	990	775	529.659	704.714	620.767	693.483	634.046	730.204	431.229
chr17	48168681	48169181	837.902	-0.0380336	0.0911968	-0.41705	0.676642	0.866574	FALSE	FALSE	inactive	'1-2	882	819	1173	563	934	1169	1735	838.706	840.118	864.798	787.159	857.017	862.23	965.396
chr17	52884552	52885052	8.62398	0.15211	0.517165	0.294123	0.768664	0.907198	FALSE	FALSE	inactive	'1-2	6	12	12	4	9	10	21	5.70548	12.3094	8.84704	5.59261	8.2582	7.3758	11.6849
chr17	53047073	53048787	280.51	-0.00122426	0.155551	-0.00787045	0.99372	0.998609	FALSE	FALSE	inactive	'1-2	272	284	298	164	274	283	643	258.648	291.323	219.701	229.297	251.416	208.735	357.781
chr17	53193973	53194980	123.083	-0.312712	0.154197	-2.028	0.0425602	0.222268	FALSE	FALSE	inactive	'1-2	134	95	151	80	135	117	300	127.422	97.4495	111.325	111.852	123.873	86.2968	166.927
chr17	54963724	54964224	1266.88	-0.088526	0.0817389	-1.08303	0.278794	0.617233	FALSE	FALSE	inactive	'1-2	1905	1607	2285	1151	1671	2003	3264	1811.49	1648.44	1684.62	1609.27	1533.27	1477.37	1816.17
chr17	55911418	55913141	3527.17	0.311534	0.145495	2.1412	0.0322578	0.18282	FALSE	FALSE	inactive	'1-2	2313	2744	3067	1972	2358	3593	6637	2199.46	2814.75	2261.16	2757.15	2163.65	2650.12	3692.99
chr17	56025594	56026336	1270.83	0.34811	0.0964304	3.60996	0.00030624	0.00317543	TRUE	TRUE	not-induced	'1-2	1410	1750	1874	1254	1612	2438	1920	1340.79	1795.12	1381.61	1753.28	1479.13	1798.22	1068.33
chr17	57508387	57508805	108.331	-0.209911	0.155287	-1.35177	0.17645	0.500566	FALSE	FALSE	inactive	'1-2	122	105	166	78	130	129	337	116.011	107.707	122.384	109.056	119.285	95.1478	187.515
chr17	62293919	62294304	1103.43	-0.176595	0.135771	-1.30068	0.193369	0.524367	FALSE	FALSE	inactive	'1-2	401	360	630	234	442	552	800	381.316	369.282	464.47	327.167	405.569	407.144	445.14
chr17	63605656	63606156	211.62	-0.153373	0.139926	-1.0961	0.273033	0.610875	FALSE	FALSE	inactive	'1-2	206	188	343	156	286	310	488	195.888	192.848	252.878	218.112	262.427	228.65	271.535
chr17	64458980	64459480	279.375	-0.152958	0.127509	-1.19959	0.230298	0.566591	FALSE	FALSE	inactive	'1-2	345	270	449	231	424	462	994	328.065	276.962	331.027	322.973	389.053	340.762	553.086
chr17	65209519	65209819	613.914	0.768614	0.196575	3.91003	9.22843e-05	0.00103415	TRUE	TRUE	not-induced	'1-2	550	840	811	835	660	1242	410	523.002	861.659	597.912	1167.46	605.601	916.074	228.134
chr17	70356483	70356983	759.757	-0.107585	0.105679	-1.01803	0.308663	0.645071	FALSE	FALSE	inactive	'1-2	899	804	1231	558	831	1006	2171	854.871	824.731	907.559	780.169	762.507	742.005	1208
chr17	70395491	70396486	867.816	-0.106021	0.0670347	-1.58159	0.113744	0.402579	FALSE	FALSE	inactive	'1-2	884	795	1191	586	950	1055	1940	840.608	815.499	878.069	819.317	871.699	778.146	1079.46
chr17	71489401	71489901	618.233	-0.0984299	0.10287	-0.956838	0.338649	0.670894	FALSE	FALSE	inactive	'1-2	843	757	1019	487	841	964	1526	801.62	776.519	751.261	680.9	771.683	711.027	849.104
chr17	73005131	73005631	291.58	-0.383599	0.103844	-3.69399	0.000220763	0.00235047	FALSE	FALSE	inactive	'1-2	348	270	462	168	382	362	814	330.918	276.962	340.611	234.889	350.515	267.004	452.93
chr17	73021018	73021518	161.567	-0.245522	0.199073	-1.23333	0.217454	0.551468	TRUE	TRUE	not-induced	'1-2	363	196	324	177	382	454	228	345.182	201.054	238.87	247.473	350.515	334.861	126.865
chr17	73780528	73781455	76177.4	-0.219903	0.177734	-1.23726	0.215992	0.550298	TRUE	TRUE	not-induced	'1-2	91973	58759	98742	55352	90064	96116	4884	87458.4	60274.1	72797.9	77390.5	82640.7	70893.2	2717.58
chr17	74434791	74435291	853.856	-0.109419	0.0909744	-1.20274	0.229076	0.565335	FALSE	FALSE	inactive	'1-2	849	704	990	476	813	980	1404	807.326	722.152	729.881	665.52	745.99	722.828	781.22
chr17	74546866	74547366	855.608	0.00117288	0.158828	0.00738459	0.994108	0.998726	TRUE	TRUE	not-induced	'1-2	1383	1350	2110	1087	1277	1556	766	1315.11	1384.81	1555.6	1519.79	1171.75	1147.67	426.221
chr17	74637749	74638021	1979.18	-0.110915	0.177411	-0.625185	0.53185	0.795846	TRUE	TRUE	not-induced	'1-2	1357	1109	1814	904	1135	1356	654	1290.39	1137.6	1337.38	1263.93	1041.45	1000.16	363.902
chr17	75230041	75230453	18426.2	-0.143535	0.44572	-0.322029	0.747431	0.898004	TRUE	TRUE	not-induced	'1-2	36399	24940	39526	22046	36116	42449	2212	34612.3	25583.1	29140.7	30823.6	33139.2	31309.5	1230.81
chr17	75283096	75285323	9236.16	0.155934	0.0793731	1.96457	0.0494641	0.246055	TRUE	TRUE	not-induced	'1-2	8970	8534	11495	7200	10141	14220	8405	8529.69	8754.05	8474.73	10066.7	9305.15	10488.4	4676.75
chr17	76389972	76390803	1740.5	-0.157708	0.122618	-1.28618	0.198382	0.529821	FALSE	FALSE	inactive	'1-2	1487	1052	1761	871	1595	1953	3087	1414.01	1079.13	1298.3	1217.79	1463.54	1440.49	1717.68
chr17	76677231	76677731	1771.31	-0.15861	0.107668	-1.47313	0.140715	0.448524	TRUE	TRUE	not-induced	'1-2	2145	1770	2936	1390	2357	2638	3124	2039.71	1815.64	2164.58	1943.43	2162.73	1945.73	1738.27
chr17	77808917	77811521	10161.9	-0.0874097	0.0714899	-1.22269	0.221449	0.556013	TRUE	TRUE	not-induced	'1-2	10758	8880	12897	6644	10693	12760	15745	10229.9	9108.97	9508.36	9289.32	9811.65	9411.51	8760.9
chr17	77949633	77950133	1068.39	-0.0957169	0.0774721	-1.2355	0.216644	0.550841	FALSE	FALSE	inactive	'1-2	1336	1117	1709	828	1209	1501	2550	1270.42	1145.8	1259.97	1157.67	1109.35	1107.11	1418.88
chr17	78001732	78002749	494.08	0.046175	0.0986413	0.468111	0.639706	0.848205	FALSE	FALSE	inactive	'1-2	405	421	599	324	465	563	1157	385.12	431.855	441.615	453.001	426.673	415.257	643.783
chr17	78106932	78107432	1037.55	-0.0833572	0.108429	-0.768776	0.442027	0.742283	FALSE	FALSE	inactive	'1-2	1062	849	1245	589	972	1302	2006	1009.87	870.891	917.88	823.511	891.885	960.329	1116.19
chr17	79012833	79013333	9814.77	1.33085	0.0880437	15.1158	1.27503e-51	7.01219e-49	TRUE	TRUE	induced	'1-2	9674	23169	11648	17173	9814	26608	11196	9199.14	23766.4	8587.53	24010.5	9005.1	19625.5	6229.73
chr17	79075431	79075931	2435.89	-0.153431	0.0999547	-1.535	0.124784	0.423289	TRUE	FALSE	not-induced	'1-2	2972	2421	3801	1803	3106	3548	5074	2826.12	2483.42	2802.3	2520.87	2850	2616.93	2823.3
chr17	79167674	79168174	7722.43	-0.136554	0.107749	-1.26733	0.205036	0.539134	TRUE	TRUE	not-induced	'1-2	6770	5564	8194	4002	6690	7636	8059	6437.68	5707.47	6041.05	5595.4	6138.59	5632.16	4484.22
chr17	80550273	80551259	4323.8	-0.227459	0.101266	-2.24615	0.0246942	0.149771	TRUE	TRUE	not-induced	'1-2	4501	3391	5194	2262	4076	4711	5868	4280.06	3478.44	3829.29	3162.62	3740.05	3474.74	3265.1
chr18	2981085	2981585	107.175	-0.266712	0.199972	-1.33374	0.182288	0.509938	FALSE	FALSE	inactive	'1-2	121	84	144	86	170	146	251	115.061	86.1659	106.164	120.241	155.988	107.687	139.663
chr18	3512047	3512547	303.521	0.089405	0.0996303	0.897368	0.369523	0.69542	FALSE	FALSE	inactive	'1-2	367	400	495	260	419	531	754	348.985	410.314	364.94	363.519	384.465	391.655	419.544
chr18	3538418	3542223	999.008	-0.140538	0.125442	-1.12034	0.262567	0.599927	FALSE	FALSE	inactive	'1-2	782	687	1034	461	826	952	1564	743.614	704.714	762.32	644.548	757.919	702.176	870.248
chr18	9416865	9417660	850.18	-0.150327	0.105916	-1.4193	0.155813	0.470228	FALSE	FALSE	inactive	'1-2	700	631	961	427	856	943	1321	665.639	647.27	708.5	597.011	785.446	695.537	735.037
chr18	11947285	11947785	3031.72	-0.123535	0.12134	-1.01809	0.308633	0.645071	TRUE	TRUE	not-induced	'1-2	1907	1718	2632	1228	2250	2521	2255	1813.39	1762.3	1940.45	1716.93	2064.55	1859.44	1254.74
chr18	13253318	13253818	175.596	-0.134258	0.162619	-0.825599	0.409032	0.723632	FALSE	FALSE	inactive	'1-2	169	144	255	98	180	244	459	160.704	147.713	188	137.019	165.164	179.969	255.399
chr18	19421443	19421943	76.6865	-0.199178	0.188605	-1.05606	0.29094	0.628055	FALSE	FALSE	inactive	'1-2	107	68	101	53	88	106	276	101.748	69.7534	74.4626	74.102	80.7468	78.1834	153.573
chr18	20263245	20263598	267.158	0.107035	0.11685	0.916004	0.359665	0.686043	FALSE	FALSE	inactive	'1-2	272	264	351	230	274	332	663	258.648	270.807	258.776	321.575	251.416	244.876	368.909
chr18	20848541	20849041	259.016	-0.0480103	0.117112	-0.409953	0.681841	0.869245	FALSE	FALSE	inactive	'1-2	314	271	376	206	294	346	973	298.587	277.988	277.207	288.019	269.768	255.203	541.401
chr18	20981207	20982014	4902	0.176758	0.105996	1.66759	0.0953967	0.365992	TRUE	TRUE	not-induced	'1-2	2008	1992	2375	1526	2160	2980	2461	1909.43	2043.36	1750.98	2133.58	1981.97	2197.99	1369.36
chr18	21140115	21140615	381.121	-0.171117	0.134992	-1.26761	0.204937	0.539085	FALSE	FALSE	inactive	'1-2	390	361	539	250	478	477	778	370.856	370.308	397.38	349.538	438.602	351.825	432.898
chr18	21601810	21602310	90.6284	0.0950978	0.228535	0.416119	0.677323	0.867058	FALSE	FALSE	inactive	'1-2	64	119	109	57	131	105	284	60.8585	122.068	80.3606	79.6946	120.203	77.4458	158.025
chr18	22450759	22451259	346.436	0.0747493	0.116881	0.639532	0.522477	0.792487	FALSE	FALSE	inactive	'1-2	328	300	421	204	277	443	1051	311.9	307.735	310.384	285.223	254.169	326.748	584.802
chr18	25291621	25292336	200.436	-0.277155	0.161905	-1.71184	0.0869266	0.34717	FALSE	FALSE	inactive	'1-2	161	139	281	113	179	185	356	153.097	142.584	207.168	157.991	164.246	136.452	198.087
chr18	32094139	32094639	247.534	0.00357701	0.163371	0.021895	0.982532	0.995199	TRUE	TRUE	not-induced	'1-2	341	321	481	271	522	609	450	324.262	329.277	354.619	378.899	478.975	449.186	250.391
chr18	34430506	34431006	75.6804	0.0443883	0.171153	0.259348	0.795367	0.918713	FALSE	FALSE	inactive	'1-2	88	93	149	72	107	143	269	83.6804	95.398	109.851	100.667	98.1808	105.474	149.678
chr18	36617912	36618177	26.8744	-0.853887	0.361702	-2.36075	0.0182381	0.117102	TRUE	FALSE	not-induced	'1-2	40	20	26	12	44	22	40	38.0365	20.5157	19.1686	16.7778	40.3734	16.2267	22.257
chr18	39547674	39548174	183.266	-0.145218	0.13824	-1.05048	0.293498	0.630748	FALSE	FALSE	inactive	'1-2	221	204	305	134	231	256	432	210.152	209.26	224.862	187.352	211.96	188.82	240.375
chr18	42149491	42149991	196.393	-0.0929286	0.148485	-0.625846	0.531416	0.79564	FALSE	FALSE	inactive	'1-2	210	221	302	104	210	271	615	199.692	226.698	222.65	145.408	192.691	199.884	342.201
chr18	42378615	42379115	256.617	0.019913	0.129063	0.154289	0.877382	0.953371	FALSE	FALSE	inactive	'1-2	255	214	293	175	236	301	553	242.483	219.518	216.015	244.677	216.548	222.011	307.703
chr18	42414841	42415341	456.93	0.0525611	0.100699	0.521962	0.601697	0.830696	FALSE	FALSE	inactive	'1-2	502	489	648	349	512	662	1527	477.359	501.609	477.74	487.955	469.8	488.278	849.66
chr18	42419166	42419666	1645.3	-0.118271	0.193523	-0.611143	0.541105	0.800987	TRUE	TRUE	not-induced	'1-2	1158	897	1386	744	1158	1322	1553	1101.16	920.129	1021.83	1040.22	1062.55	975.08	864.127
chr18	43192012	43192512	320.259	0.0652098	0.113352	0.575284	0.565099	0.812902	FALSE	FALSE	inactive	'1-2	361	371	518	262	423	562	881	343.28	380.566	381.897	366.316	388.135	414.52	490.21
chr18	44555054	44555554	4346.99	-0.0592829	0.109738	-0.540223	0.589043	0.823773	TRUE	TRUE	not-induced	'1-2	2044	2176	3285	1499	2505	2807	2322	1943.67	2232.11	2421.88	2095.83	2298.53	2070.39	1292.02
chr18	45554984	45555484	464.86	0.0432341	0.122905	0.351769	0.725012	0.887716	TRUE	TRUE	not-induced	'1-2	477	486	657	352	523	640	784	453.586	498.531	484.375	492.149	479.893	472.051	436.237
chr18	45659116	45660518	631.048	-0.164073	0.0775616	-2.11538	0.0343973	0.191314	FALSE	FALSE	inactive	'1-2	753	623	893	428	746	811	1579	716.038	639.064	658.367	598.409	684.513	598.177	878.594
chr18	45972099	45972599	332.54	-0.0395972	0.124793	-0.317303	0.751013	0.899265	FALSE	FALSE	inactive	'1-2	285	280	408	220	373	401	1153	271.01	287.22	300.799	307.593	342.256	295.769	641.557
chr18	46395141	46395641	1410.05	-0.060238	0.0883978	-0.681442	0.495592	0.775664	FALSE	FALSE	inactive	'1-2	1613	1342	1927	942	1551	2029	2738	1533.82	1376.6	1420.69	1317.06	1423.16	1496.55	1523.49
chr18	46465119	46465619	459.354	0.142357	0.132995	1.07039	0.284443	0.622857	FALSE	FALSE	inactive	'1-2	508	563	646	382	610	763	1766	483.064	577.517	476.266	534.094	559.722	562.773	982.646
chr18	47688016	47689464	863.093	-0.0976783	0.0825813	-1.18281	0.236883	0.572232	FALSE	FALSE	inactive	'1-2	1024	991	1353	636	1108	1202	2029	973.735	1016.55	997.504	889.224	1016.68	886.571	1128.99
chr18	54875215	54875715	357.892	-0.074488	0.105139	-0.708473	0.478652	0.764627	FALSE	FALSE	inactive	'1-2	386	304	485	252	404	506	958	367.053	311.839	357.568	352.334	370.701	373.215	533.055
chr18	55772309	55772809	534.838	0.0671362	0.0934062	0.718755	0.472292	0.761073	FALSE	FALSE	inactive	'1-2	645	667	787	430	643	791	1516	613.339	684.198	580.218	601.205	590.002	583.425	843.539
chr18	59171772	59172272	1021.5	-0.00413182	0.0685749	-0.0602527	0.951954	0.983836	FALSE	FALSE	inactive	'1-2	1390	1292	1749	908	1358	1698	2436	1321.77	1325.31	1289.46	1269.52	1246.07	1252.41	1355.45
chr18	60822434	60824489	3117.82	-0.0233328	0.0802437	-0.290774	0.771224	0.90838	FALSE	FALSE	inactive	'1-2	3033	2787	3816	1986	3053	3698	9366	2884.12	2858.86	2813.36	2776.73	2801.36	2727.57	5211.47
chr18	66993263	66993763	138.195	0.0354563	0.196662	0.18029	0.856925	0.945716	FALSE	FALSE	inactive	'1-2	113	139	201	80	138	185	349	107.453	142.584	148.188	111.852	126.626	136.452	194.192
chr18	67798956	67799456	138.09	-0.31953	0.172128	-1.85635	0.0634041	0.288823	FALSE	FALSE	inactive	'1-2	202	123	188	88	178	194	318	192.085	126.172	138.604	123.037	163.329	143.09	176.943
chr18	72913837	72914337	472.161	-0.0609625	0.114903	-0.530555	0.595727	0.82725	FALSE	FALSE	inactive	'1-2	392	355	545	277	494	573	784	372.758	364.154	401.803	387.288	453.283	422.633	436.237
chr18	74170577	74171077	7128.26	-0.165351	0.127806	-1.29377	0.195745	0.526689	FALSE	FALSE	inactive	'1-2	6336	4884	8820	4025	8132	9735	17085	6024.99	5009.93	6502.57	5627.56	7461.74	7180.34	9506.51
chr18	74203323	74203803	514.648	0.17521	0.210413	0.832698	0.405015	0.721178	FALSE	FALSE	inactive	'1-2	262	389	549	211	397	614	1254	249.139	399.03	404.752	295.01	364.278	452.874	697.756
chr18	74409127	74409942	776.592	-0.0204547	0.134548	-0.152025	0.879167	0.954317	FALSE	FALSE	inactive	'1-2	695	551	891	421	624	957	1289	660.885	565.207	656.893	588.622	572.568	705.864	717.231
chr18	74703040	74703540	562.502	-0.0528496	0.139288	-0.379428	0.70437	0.878558	FALSE	FALSE	inactive	'1-2	641	498	597	354	613	737	1744	609.536	510.841	440.14	494.946	562.475	543.596	970.404
chr19	823578	824078	1362.38	-0.0454989	0.0888834	-0.511895	0.608725	0.833973	FALSE	FALSE	inactive	'1-2	1067	957	1325	705	1198	1388	2138	1014.62	981.676	976.861	985.697	1099.26	1023.76	1189.64
chr19	871433	871933	600.65	-0.112642	0.105604	-1.06665	0.286132	0.624165	FALSE	FALSE	inactive	'1-2	491	446	781	340	552	679	2147	466.899	457.5	575.795	475.372	506.503	500.816	1194.64
chr19	1371131	1371472	3406.5	-0.00154309	0.095492	-0.0161593	0.987107	0.996211	TRUE	TRUE	not-induced	'1-2	1860	1583	2278	1220	1859	2461	2050	1768.7	1623.82	1679.46	1705.74	1705.78	1815.18	1140.67
chr19	2150092	2152039	12093.5	0.000232079	0.15172	0.00152965	0.99878	0.999813	TRUE	TRUE	not-induced	'1-2	9718	8695	13418	6578	10883	14920	5120	9240.98	8919.2	9892.46	9197.04	9985.99	11004.7	2848.89
chr19	2614503	2615003	1849.53	-0.112296	0.0835604	-1.34389	0.178984	0.504991	TRUE	TRUE	not-induced	'1-2	2571	2213	3208	1445	2531	3117	3819	2444.8	2270.06	2365.11	2020.33	2322.39	2299.04	2124.99
chr19	2900302	2901121	4668.15	-0.0892872	0.0906667	-0.984785	0.32473	0.659655	TRUE	TRUE	not-induced	'1-2	6053	5001	6587	3446	5889	6915	7370	5755.88	5129.95	4856.29	4818.03	5403.61	5100.36	4100.85
chr19	3737118	3737618	57486.2	3.83437	0.385144	9.95567	2.38218e-23	1.20363e-21	TRUE	TRUE	induced	'1-2	12534	202618	18913	187245	21555	245952	13843	11918.8	207842	13943.7	261797	19778.4	181409	7702.58
chr19	4700153	4700653	2255.26	-0.154502	0.0745409	-2.07272	0.0381983	0.205647	TRUE	FALSE	not-induced	'1-2	2444	1878	2921	1411	2309	2744	3799	2324.03	1926.42	2153.52	1972.79	2118.69	2023.92	2113.86
chr19	4812967	4813467	1008.28	-0.102066	0.144734	-0.705193	0.48069	0.765787	TRUE	TRUE	not-induced	'1-2	975	685	1293	676	1103	1417	901	927.141	702.663	953.268	945.15	1012.09	1045.15	501.338
chr19	4911941	4912307	537.182	-0.205795	0.115627	-1.77982	0.0751058	0.317358	TRUE	TRUE	not-induced	'1-2	865	703	1084	498	882	936	1217	822.54	721.127	799.183	696.279	809.303	690.374	677.169
chr19	6092308	6092808	3218.82	-0.130919	0.141353	-0.92619	0.354347	0.682657	TRUE	TRUE	not-induced	'1-2	4073	3115	4740	2395	3755	4516	5719	3873.07	3195.32	3494.58	3348.57	3445.5	3330.91	3182.19
chr19	7196500	7198537	978.607	0.214418	0.214034	1.00179	0.316443	0.651803	FALSE	FALSE	inactive	'1-2	778	1206	1288	515	950	1372	2560	739.811	1237.1	949.582	720.048	871.699	1011.96	1424.45
chr19	7683563	7685378	17426.9	0.0822736	0.0699079	1.17689	0.239241	0.57475	TRUE	TRUE	not-induced	'1-2	16780	16349	21725	12495	16415	21105	25307	15956.3	16770.6	16016.8	17469.9	15062	15566.6	14081.4
chr19	8253532	8254032	772.476	-0.145195	0.109797	-1.32239	0.186037	0.515608	FALSE	FALSE	inactive	'1-2	811	724	1047	432	929	1096	1763	771.191	742.668	771.904	604.001	852.429	808.387	980.976
chr19	9120926	9121342	1092.88	-0.234686	0.0751756	-3.12184	0.00179727	0.0160821	TRUE	FALSE	not-induced	'1-2	1405	1159	2007	779	1411	1641	2243	1336.03	1188.88	1479.67	1089.16	1294.7	1210.37	1248.06
chr19	10138242	10138619	744.211	-0.1785	0.105107	-1.69827	0.0894559	0.353674	FALSE	FALSE	inactive	'1-2	568	462	717	339	685	739	1059	540.119	473.913	528.611	473.973	628.541	545.071	589.254
chr19	10589605	10590017	442.795	0.104389	0.164591	0.634232	0.525929	0.793193	FALSE	FALSE	inactive	'1-2	440	478	713	384	530	695	1162	418.402	490.325	525.662	536.89	486.316	512.618	646.565
chr19	10855653	10856153	462.846	-0.0488272	0.089262	-0.54701	0.584372	0.821949	FALSE	FALSE	inactive	'1-2	506	471	601	310	536	608	1218	481.162	483.145	443.089	433.427	491.821	448.448	677.725
chr19	11248744	11249729	1614.2	0.0461582	0.0961965	0.479833	0.631346	0.844244	FALSE	FALSE	inactive	'1-2	1730	1585	2089	1274	1769	2119	3841	1645.08	1625.87	1540.12	1781.24	1623.19	1562.93	2137.23
chr19	11807480	11808875	206.213	-0.196934	0.118753	-1.65835	0.0972472	0.369899	FALSE	FALSE	inactive	'1-2	273	193	310	143	253	306	443	259.599	197.976	228.549	199.936	232.147	225.699	246.496
chr19	12792247	12792747	2624.78	-0.0360642	0.133766	-0.269607	0.787463	0.916546	TRUE	TRUE	not-induced	'1-2	2051	1841	2520	1367	2251	2614	2115	1950.32	1888.47	1857.88	1911.27	2065.47	1928.03	1176.84
chr19	14639920	14640939	2599.51	-0.0870654	0.103958	-0.837507	0.402307	0.719344	FALSE	FALSE	inactive	'1-2	2733	2186	3225	1494	2631	3547	6413	2598.85	2242.37	2377.64	2088.84	2414.15	2616.19	3568.35
chr19	16247342	16247842	176.994	-0.079967	0.181487	-0.44062	0.659488	0.858267	FALSE	FALSE	inactive	'1-2	229	161	315	133	197	329	511	217.759	165.151	232.235	185.954	180.763	242.664	284.333
chr19	16527753	16528253	2364.58	-0.138424	0.073519	-1.88283	0.0597235	0.278716	FALSE	FALSE	inactive	'1-2	2596	2290	3293	1453	2731	3162	4453	2468.57	2349.05	2427.78	2031.51	2505.9	2332.23	2477.76
chr19	16565092	16565592	694.226	-0.0551511	0.111774	-0.493417	0.621718	0.840239	FALSE	FALSE	inactive	'1-2	460	510	727	316	515	583	986	437.42	523.15	535.983	441.816	472.552	430.009	548.635
chr19	17393342	17393842	4001.14	-0.125584	0.096403	-1.3027	0.192678	0.523486	TRUE	FALSE	not-induced	'1-2	4617	3340	5110	2606	4151	5280	6990	4390.37	3426.12	3767.36	3643.58	3808.86	3894.42	3889.41
chr19	18468578	18469078	1931.51	0.0319399	0.103003	0.310088	0.756494	0.901425	FALSE	TRUE	not-induced	'1-2	2132	1851	2322	1327	2110	2768	3429	2027.35	1898.73	1711.9	1855.35	1936.09	2041.62	1907.98
chr19	18572617	18573117	1538.52	-0.0174497	0.0744567	-0.23436	0.814705	0.926178	FALSE	FALSE	inactive	'1-2	1735	1500	2096	1025	1689	2306	3947	1649.84	1538.68	1545.28	1433.11	1549.79	1700.86	2196.21
chr19	18598845	18600378	3564.44	-0.118193	0.0697509	-1.6945	0.0901697	0.355003	FALSE	FALSE	inactive	'1-2	4037	3399	4932	2442	3915	4471	6797	3838.84	3486.64	3636.13	3414.29	3592.32	3297.72	3782.02
chr19	18653642	18654142	474.048	0.093922	0.207988	0.451575	0.651575	0.854445	FALSE	FALSE	inactive	'1-2	234	304	454	164	295	461	3006	222.514	311.839	334.713	229.297	270.685	340.024	1672.61
chr19	20011622	20011885	1533.83	-0.0550494	0.113222	-0.486205	0.626821	0.842614	TRUE	TRUE	not-induced	'1-2	1042	793	1237	649	962	1299	1006	990.852	813.447	911.982	907.4	882.709	958.116	559.763
chr19	33588953	33589453	2120.52	-0.122703	0.119984	-1.02266	0.306467	0.643472	FALSE	FALSE	inactive	'1-2	2437	1901	2830	1499	2488	2840	5975	2317.38	1950.02	2086.43	2095.83	2282.93	2094.73	3324.64
chr19	35015822	35016322	30.3314	-0.375904	0.283646	-1.32525	0.185087	0.513869	TRUE	FALSE	not-induced	'1-2	54	30	37	18	40	42	66	51.3493	30.7735	27.2784	25.1667	36.7031	30.9783	36.724
chr19	36247865	36249680	6215.22	-0.096539	0.0477501	-2.02176	0.0432017	0.224599	TRUE	TRUE	not-induced	'1-2	6099	5292	8093	3967	6344	7428	8066	5799.62	5428.45	5966.59	5546.47	5821.11	5478.74	4488.12
chr19	37063728	37064203	5844.49	0.218464	0.0923531	2.36553	0.0180041	0.116016	FALSE	TRUE	not-induced	'1-2	3037	2947	3675	2456	3165	4655	5860	2887.92	3022.99	2709.41	3433.86	2904.13	3433.43	3260.65
chr19	38602407	38602907	952.77	-0.265412	0.0871514	-3.04541	0.0023236	0.02021	FALSE	FALSE	inactive	'1-2	929	648	1026	451	871	981	5515	883.399	664.708	756.422	630.566	799.21	723.565	3068.68
chr19	39224967	39225467	1840.63	-0.159871	0.0851891	-1.87666	0.0605653	0.281353	TRUE	FALSE	not-induced	'1-2	1635	1316	2081	1031	1615	1771	2621	1554.74	1349.93	1534.22	1441.49	1481.89	1306.25	1458.39
chr19	40828669	40830140	8242.48	-0.17173	0.122081	-1.40669	0.159519	0.475298	TRUE	FALSE	not-induced	'1-2	9576	7095	11224	5303	7782	9597	14388	9105.95	7277.94	8274.93	7414.4	7140.59	7078.55	8005.84
chr19	42363647	42364210	8193.39	0.051714	0.10952	0.472189	0.636792	0.847073	TRUE	TRUE	not-induced	'1-2	10441	9310	13184	6677	9705	14514	2562	9928.49	9550.06	9719.95	9335.46	8905.09	10705.2	1425.56
chr19	44037984	44038621	1013.36	-0.0559746	0.100787	-0.555375	0.578638	0.819771	FALSE	FALSE	inactive	'1-2	1365	1320	1763	878	1569	1761	3209	1298	1354.04	1299.78	1227.58	1439.68	1298.88	1785.57
chr19	44283278	44283778	1904.65	-0.0219159	0.0823196	-0.26623	0.790062	0.917614	FALSE	FALSE	inactive	'1-2	1562	1344	1837	1012	1570	1925	2639	1485.33	1378.65	1354.33	1414.93	1440.6	1419.84	1468.4
chr19	44405792	44406292	3155.38	0.0520039	0.134708	0.386048	0.699461	0.875534	TRUE	TRUE	not-induced	'1-2	1104	1029	1495	823	1268	1667	1728	1049.81	1055.53	1102.19	1150.68	1163.49	1229.55	961.501
chr19	45250526	45252361	2202.25	-0.232056	0.147963	-1.56833	0.116804	0.40803	TRUE	TRUE	not-induced	'1-2	3221	2485	4618	2059	4252	4606	3075	3062.89	2549.07	3404.64	2878.79	3901.54	3397.29	1711.01
chr19	47474092	47474592	573.311	-0.138177	0.0978115	-1.41268	0.157749	0.47318	FALSE	FALSE	inactive	'1-2	661	622	930	395	780	878	1736	628.554	638.038	685.646	552.27	715.71	647.595	965.953
chr19	47661567	47662067	688.235	-0.043234	0.090932	-0.475454	0.634463	0.846059	FALSE	FALSE	inactive	'1-2	728	679	1031	480	739	949	1699	692.265	696.508	760.108	671.113	678.09	699.963	945.365
chr19	49661831	49662331	2432.66	-0.0209611	0.118865	-0.176343	0.860024	0.947436	TRUE	FALSE	not-induced	'1-2	3586	2982	4147	2278	3589	4573	5795	3409.98	3058.89	3057.39	3184.99	3293.19	3372.95	3224.48
chr19	50364824	50365324	3964.18	-0.101283	0.0939052	-1.07857	0.280781	0.619307	TRUE	TRUE	not-induced	'1-2	4164	3654	5344	2652	4758	5387	5064	3959.6	3748.22	3939.88	3707.9	4365.83	3973.34	2817.73
chr19	50879531	50880027	1729.02	0.0282745	0.182544	0.154892	0.876907	0.953371	TRUE	TRUE	not-induced	'1-2	1273	1133	1566	925	1542	1895	1616	1210.51	1162.21	1154.54	1293.29	1414.9	1397.71	899.182
chr19	51161542	51162042	4197.4	-0.0101171	0.206746	-0.0489352	0.960971	0.987043	FALSE	FALSE	inactive	'1-2	4882	3965	5151	2968	4732	6066	19941	4642.36	4067.24	3797.59	4149.71	4341.98	4474.16	11095.7
chr19	52310589	52311062	425.381	-0.00138682	0.134689	-0.0102964	0.991785	0.998067	TRUE	TRUE	not-induced	'1-2	358	297	475	275	352	445	591	340.427	304.658	350.195	384.492	322.987	328.223	328.847
chr19	53700117	53700617	1134.22	-0.0633051	0.113874	-0.55592	0.578266	0.819616	TRUE	TRUE	not-induced	'1-2	927	728	1141	631	913	1117	949	881.497	746.771	841.206	882.234	837.748	823.876	528.047
chr19	55972658	55973589	5127.51	-0.0534194	0.0717343	-0.744684	0.456463	0.750916	TRUE	TRUE	not-induced	'1-2	6211	5212	7330	4011	6428	7627	9283	5906.12	5346.39	5404.07	5607.99	5898.19	5625.52	5165.29
chr19	57350355	57351282	17571.9	-0.106624	0.125897	-0.846918	0.397041	0.716016	TRUE	TRUE	not-induced	'1-2	14523	10677	16729	9241	15563	18532	12966	13810.1	10952.3	12333.5	12920.3	14280.3	13668.8	7214.6
chr19	57946231	57947072	4864.66	-0.092919	0.0988257	-0.940232	0.347099	0.676826	TRUE	TRUE	not-induced	'1-2	4616	3566	5106	2760	4341	5235	4621	4389.42	3657.95	3764.42	3858.9	3983.2	3861.23	2571.24
chr19	58891946	58892334	21462.3	-0.0153088	0.10942	-0.139908	0.888733	0.958532	TRUE	TRUE	not-induced	'1-2	7638	6235	9275	5008	7533	10021	5005	7263.08	6395.77	6838.02	7001.94	6912.11	7391.28	2784.9
chr2	44507	45007	162.061	-0.0959437	0.150905	-0.635789	0.524914	0.793193	FALSE	FALSE	inactive	'1-2	188	146	198	125	181	187	413	178.772	149.765	145.976	174.769	166.082	137.927	229.803
chr2	9630920	9631420	142.193	-0.0202957	0.182874	-0.110982	0.911631	0.966206	FALSE	FALSE	inactive	'1-2	140	118	145	83	156	186	428	133.128	121.043	106.902	116.047	143.142	137.19	238.15
chr2	11652954	11653296	256.331	0.446155	0.173649	2.56929	0.0101906	0.0732609	TRUE	TRUE	not-induced	'1-2	165	211	265	200	213	343	253	156.901	216.441	195.372	279.63	195.444	252.99	140.775
chr2	11679277	11680425	2160.62	0.549947	0.128365	4.28424	1.83363e-05	0.00022182	TRUE	TRUE	not-induced	'1-2	2145	2979	2620	2118	2301	3915	3463	2039.71	3055.81	1931.6	2961.28	2111.35	2887.62	1926.9
chr2	15003517	15004017	212.33	-0.0147752	0.151698	-0.0973993	0.922409	0.97036	FALSE	FALSE	inactive	'1-2	204	160	210	128	171	215	362	193.986	164.126	154.823	178.963	156.906	158.58	201.426
chr2	16170023	16170970	8810.56	1.96623	0.146952	13.3802	7.89864e-41	1.88238e-38	TRUE	TRUE	induced	'1-2	2020	7894	2734	6110	2233	9156	3175	1920.85	8097.54	2015.65	8542.71	2048.95	6753.28	1766.65
chr2	20250307	20252274	3713.74	-0.0899867	0.085565	-1.05168	0.292948	0.630426	TRUE	FALSE	not-induced	'1-2	3377	2785	4343	2167	3403	4165	5591	3211.24	2856.81	3201.89	3029.79	3122.52	3072.02	3110.97
chr2	20835370	20835815	702.58	0.0270872	0.0946069	0.286313	0.774638	0.909704	FALSE	FALSE	inactive	'1-2	523	524	660	320	591	757	1377	497.328	537.511	486.587	447.408	542.288	558.348	766.196
chr2	22973494	22973994	231.009	0.0907416	0.142008	0.63899	0.52283	0.792487	FALSE	FALSE	inactive	'1-2	280	298	407	181	255	396	577	266.256	305.684	300.062	253.065	233.982	292.081	321.057
chr2	24561807	24562496	706.3	0.117808	0.134251	0.877514	0.380207	0.703933	FALSE	FALSE	inactive	'1-2	625	487	560	402	519	740	1072	594.321	499.557	412.862	562.057	476.223	545.809	596.487
chr2	28884270	28885047	630.471	-0.0439511	0.0993394	-0.442434	0.658175	0.857647	FALSE	FALSE	inactive	'1-2	769	743	1099	486	842	1081	1533	731.253	762.158	810.241	679.502	772.6	797.323	852.999
chr2	29333818	29334318	297.484	0.064979	0.156561	0.41504	0.678113	0.867603	FALSE	FALSE	inactive	'1-2	316	292	360	213	260	335	677	300.489	299.529	265.411	297.806	238.57	247.089	376.699
chr2	29397815	29398315	180.416	-0.15752	0.151147	-1.04216	0.297335	0.634567	FALSE	FALSE	inactive	'1-2	244	194	271	138	236	256	457	232.023	199.002	199.796	192.945	216.548	188.82	254.286
chr2	29983877	29984736	467.736	0.134392	0.138542	0.970041	0.332026	0.665029	FALSE	TRUE	not-induced	'1-2	534	525	586	289	509	802	847	507.788	538.537	432.03	404.066	467.047	591.539	471.292
chr2	38009870	38010370	321.699	-0.0683968	0.110134	-0.621031	0.534579	0.797268	FALSE	FALSE	inactive	'1-2	325	251	373	214	312	373	814	309.047	257.472	274.995	299.204	286.284	275.117	452.93
chr2	38365624	38366124	269.991	-0.173385	0.115293	-1.50387	0.132615	0.43621	FALSE	FALSE	inactive	'1-2	304	245	418	177	329	398	610	289.078	251.317	308.172	247.473	301.883	293.557	339.419
chr2	41050318	41050818	155.614	-0.315688	0.16571	-1.90506	0.0567719	0.269695	FALSE	FALSE	inactive	'1-2	91	64	113	37	83	102	213	86.5331	65.6502	83.3096	51.7316	76.1589	75.2331	118.518
chr2	42002736	42003236	171.149	-0.115612	0.161716	-0.714906	0.474667	0.762014	FALSE	FALSE	inactive	'1-2	199	156	253	130	243	282	380	189.232	160.022	186.525	181.76	222.971	207.997	211.441
chr2	42020843	42021343	53.575	0.0319795	0.248664	0.128605	0.89767	0.962797	FALSE	FALSE	inactive	'1-2	42	32	65	26	46	82	141	39.9384	32.8251	47.9215	36.3519	42.2086	60.4815	78.4558
chr2	43618632	43619132	65.3328	-0.1562	0.196669	-0.794232	0.42706	0.733893	FALSE	FALSE	inactive	'1-2	64	58	83	43	82	78	165	60.8585	59.4955	61.192	60.1205	75.2413	57.5312	91.81
chr2	44773457	44773957	495.587	0.0515962	0.12093	0.426662	0.669626	0.863809	FALSE	FALSE	inactive	'1-2	555	589	732	380	518	634	1349	527.757	604.187	539.669	531.298	475.305	467.625	750.617
chr2	44980960	44981460	222.307	-0.162853	0.153868	-1.05839	0.289876	0.626884	FALSE	FALSE	inactive	'1-2	259	189	276	139	249	291	668	246.287	193.873	203.482	194.343	228.477	214.636	371.692
chr2	45554749	45555249	749.907	-0.244295	0.13863	-1.76221	0.0780342	0.32607	FALSE	FALSE	inactive	'1-2	545	435	675	307	618	622	966	518.248	446.216	497.646	429.233	567.063	458.774	537.506
chr2	45936291	45936791	775.371	-0.0279803	0.0942047	-0.297016	0.766454	0.905828	FALSE	FALSE	inactive	'1-2	770	715	927	467	748	912	1692	732.203	733.436	683.434	652.937	686.348	672.673	941.47
chr2	46553407	46553907	493.229	0.0248208	0.0998523	0.248575	0.80369	0.922198	TRUE	TRUE	not-induced	'1-2	505	512	742	371	558	710	892	480.211	525.202	547.042	518.714	512.008	523.681	496.331
chr2	47029989	47030566	748.51	-0.0179481	0.0869402	-0.206442	0.836445	0.935722	FALSE	FALSE	inactive	'1-2	960	844	1115	591	881	1110	2089	912.877	865.762	822.037	826.308	808.386	818.713	1162.37
chr2	51310643	51311143	13.7823	0.250845	0.383701	0.65375	0.513273	0.786221	FALSE	TRUE	not-induced	'1-2	22	16	15	18	15	19	30	20.9201	16.4126	11.0588	25.1667	13.7637	14.014	16.6927
chr2	53672667	53673167	114.136	-0.0123782	0.190422	-0.065004	0.948171	0.981662	FALSE	FALSE	inactive	'1-2	136	122	154	81	130	162	242	129.324	125.146	113.537	113.25	119.285	119.488	134.655
chr2	53678057	53678557	278.335	-0.0938425	0.118628	-0.791068	0.428904	0.735007	FALSE	FALSE	inactive	'1-2	279	235	336	177	261	298	539	265.305	241.059	247.717	247.473	239.488	219.799	299.913
chr2	54868982	54869482	403.534	-0.0596432	0.107893	-0.552802	0.580399	0.820396	FALSE	FALSE	inactive	'1-2	314	278	421	234	375	413	616	298.587	285.168	310.384	327.167	344.092	304.62	342.757
chr2	56006728	56007228	13735.7	-0.35063	0.254163	-1.37954	0.167727	0.486648	TRUE	TRUE	not-induced	'1-2	31842	18366	35796	17421	35614	36434	1836	30279	18839.6	26390.7	24357.2	32678.6	26873	1021.6
chr2	57861416	57861916	5.82176	-3.086	0.825898	-3.73654	0.000186571	0.00200736	TRUE	FALSE	NULL	'1-2	15	2	27	1	8	2	18	14.2637	2.05157	19.9058	1.39815	7.34062	1.47516	10.0156
chr2	65602082	65602582	398.225	-0.34755	0.107192	-3.2423	0.00118569	0.0110522	FALSE	FALSE	inactive	'1-2	500	362	567	273	557	477	1106	475.457	371.334	418.023	381.695	511.091	351.825	615.405
chr2	65905843	65906343	1435.97	-0.0732657	0.356397	-0.205573	0.837124	0.93611	FALSE	FALSE	inactive	'1-2	649	516	794	395	540	722	1383	617.143	529.305	585.379	552.27	495.492	532.532	769.535
chr2	67980115	67980514	799.4	-0.0611267	0.180266	-0.339092	0.73454	0.891915	FALSE	FALSE	inactive	'1-2	591	510	686	361	523	619	1660	561.99	523.15	505.756	504.733	479.893	456.562	923.665
chr2	69235855	69236355	251.513	0.565513	0.141374	4.00012	6.33116e-05	0.000723655	FALSE	FALSE	inactive	'1-2	302	435	354	290	292	485	804	287.176	446.216	260.988	405.464	267.933	357.726	447.365
chr2	72032328	72032643	71.978	0.0538721	0.244904	0.219972	0.825893	0.93141	FALSE	FALSE	inactive	'1-2	84	97	111	50	81	102	186	79.8767	99.5011	81.8351	69.9076	74.3238	75.2331	103.495
chr2	73200274	73202175	1179.63	-0.0379893	0.0720028	-0.527609	0.597771	0.828692	FALSE	FALSE	inactive	'1-2	1461	1220	1819	903	1367	1845	2845	1389.28	1251.46	1341.06	1262.53	1254.33	1360.83	1583.03
chr2	74443097	74443597	165.841	-0.10328	0.13698	-0.753981	0.450861	0.746814	FALSE	FALSE	inactive	'1-2	160	116	186	100	158	195	424	152.146	118.991	137.129	139.815	144.977	143.828	235.924
chr2	76235118	76235618	196.764	-0.170702	0.126378	-1.35072	0.176784	0.501157	FALSE	FALSE	inactive	'1-2	255	191	353	162	254	314	564	242.483	195.925	260.25	226.501	233.065	231.6	313.823
chr2	84311227	84313257	806.704	0.247676	0.125942	1.96658	0.0492311	0.245195	FALSE	FALSE	inactive	'1-2	297	380	418	234	309	437	656	282.421	389.798	308.172	327.167	283.531	322.322	365.014
chr2	86653336	86653836	206.039	-0.0816094	0.152475	-0.53523	0.592491	0.825412	FALSE	FALSE	inactive	'1-2	205	157	265	137	157	213	599	194.937	161.048	195.372	191.547	144.06	157.104	333.298
chr2	88926708	88928057	7353.39	0.0838563	0.173321	0.483822	0.628512	0.843147	TRUE	TRUE	not-induced	'1-2	6555	6973	9862	4564	7351	10744	7936	6233.24	7152.8	7270.79	6381.16	6745.11	7924.55	4415.78
chr2	98702128	98704052	7672.42	0.496331	0.134609	3.6872	0.000226737	0.00241229	TRUE	TRUE	not-induced	'1-2	6453	8522	8839	6746	7676	13029	7387	6136.25	8741.74	6516.58	9431.93	7043.32	9609.92	4110.31
chr2	99265869	99266369	228.529	-0.201591	0.152125	-1.32517	0.185114	0.513869	FALSE	FALSE	inactive	'1-2	292	174	382	188	287	371	620	277.667	178.487	281.631	262.852	263.345	273.642	344.983
chr2	100257357	100257857	986.612	-0.0571142	0.0776911	-0.735145	0.462251	0.754597	FALSE	FALSE	inactive	'1-2	908	794	1232	606	923	1161	2905	863.43	814.473	908.296	847.28	846.924	856.33	1616.41
chr2	105945432	105945932	588.597	0.0541441	0.137448	0.393924	0.693637	0.87318	FALSE	FALSE	inactive	'1-2	505	506	701	377	563	713	2562	480.211	519.047	516.815	527.103	516.596	525.894	1425.56
chr2	105996080	105996787	452.104	0.110959	0.103105	1.07618	0.281846	0.620068	FALSE	FALSE	inactive	'1-2	448	463	574	326	417	549	1074	426.009	474.938	423.183	455.797	382.63	404.931	597.6
chr2	106002174	106002674	445.173	-0.224357	0.105034	-2.13604	0.0326766	0.184462	FALSE	FALSE	inactive	'1-2	628	494	769	334	580	647	1035	597.174	506.738	566.948	466.983	532.195	477.214	575.899
chr2	106266815	106267315	225.154	-0.0861473	0.148836	-0.578808	0.562718	0.812148	TRUE	TRUE	not-induced	'1-2	281	257	374	174	338	397	470	267.207	263.627	275.733	243.278	310.141	292.819	261.519
chr2	108035393	108035893	214.584	-0.240883	0.13272	-1.81497	0.0695288	0.304593	FALSE	FALSE	inactive	'1-2	231	184	254	128	260	240	513	219.661	188.744	187.262	178.963	238.57	177.019	285.446
chr2	109233269	109233769	114.894	0.0456528	0.209808	0.217593	0.827746	0.932331	FALSE	FALSE	inactive	'1-2	63	78	113	53	77	93	217	59.9076	80.0112	83.3096	74.102	70.6535	68.5949	120.744
chr2	112702320	112702820	122.409	0.105084	0.174693	0.601534	0.547484	0.805938	FALSE	FALSE	inactive	'1-2	64	68	116	55	68	108	502	60.8585	69.7534	85.5214	76.8983	62.3953	79.6586	279.325
chr2	120183336	120183836	642.374	-0.047239	0.0906162	-0.521309	0.602152	0.830696	TRUE	TRUE	not-induced	'1-2	1018	845	1327	724	1114	1349	1045	968.03	866.788	978.335	1012.26	1022.18	994.995	581.464
chr2	120249644	120250144	2422.91	-0.245922	0.211839	-1.16089	0.245686	0.581921	TRUE	TRUE	not-induced	'1-2	1795	1329	2644	1221	2444	2580	337	1706.89	1363.27	1949.3	1707.14	2242.56	1902.96	187.515
chr2	120435348	120435848	669.814	-0.019826	0.116766	-0.169792	0.865173	0.950235	FALSE	FALSE	inactive	'1-2	790	744	1073	474	724	1014	2246	751.222	763.184	791.073	662.724	664.326	747.906	1249.73
chr2	120473168	120473779	2649.12	-0.0982543	0.0641233	-1.53227	0.125456	0.424589	TRUE	TRUE	not-induced	'1-2	2540	2186	3222	1577	2564	3016	3752	2415.32	2242.37	2375.43	2204.88	2352.67	2224.54	2087.7
chr2	121010480	121010980	1135.26	0.247486	0.226562	1.09236	0.274677	0.612826	FALSE	TRUE	not-induced	'1-2	792	1160	1486	602	1028	1736	1845	753.124	1189.91	1095.56	841.687	943.27	1280.44	1026.6
chr2	121020232	121020732	245.29	0.0169141	0.108841	0.155401	0.876505	0.953371	FALSE	FALSE	inactive	'1-2	294	267	363	198	287	366	756	279.569	273.885	267.623	276.834	263.345	269.954	420.657
chr2	126264446	126264946	6.94209	0.702493	0.699798	1.00385	0.31545	0.651352	FALSE	FALSE	inactive	'1-2	4	8	5	4	2	3	15	3.80365	8.20628	3.68627	5.59261	1.83515	2.21274	8.34637
chr2	127933211	127933962	2068.79	-0.0848359	0.0923906	-0.918232	0.358498	0.685682	TRUE	FALSE	not-induced	'1-2	2196	1771	2729	1408	2133	2613	3609	2088.21	1816.66	2011.96	1968.6	1957.19	1927.3	2008.14
chr2	130652244	130652744	426.721	0.229555	0.190739	1.2035	0.228783	0.56481	FALSE	FALSE	inactive	'1-2	306	376	453	266	418	574	2480	290.98	385.695	333.976	371.908	383.547	423.371	1379.93
chr2	130687178	130687621	851.619	-0.110833	0.103736	-1.06841	0.285336	0.623379	FALSE	FALSE	inactive	'1-2	895	755	1037	519	878	1003	1486	851.068	774.467	764.532	725.641	805.633	739.792	826.847
chr2	134312349	134312849	681.263	-0.213738	0.0857702	-2.49198	0.0127033	0.0879635	FALSE	FALSE	inactive	'1-2	967	750	1182	506	857	1007	1831	919.533	769.339	871.433	707.465	786.364	742.743	1018.81
chr2	134336846	134337168	83.797	0.0120116	0.195376	0.0614794	0.950977	0.983227	FALSE	FALSE	inactive	'1-2	96	109	132	61	125	144	277	91.2877	111.811	97.3174	85.2872	114.697	106.211	154.13
chr2	139775269	139775769	1054.44	-0.0816977	0.102546	-0.796696	0.425628	0.732705	FALSE	FALSE	inactive	'1-2	1165	1002	1410	748	1137	1281	3052	1107.81	1027.84	1039.53	1045.82	1043.29	944.839	1698.21
chr2	139935493	139935993	60.1647	-0.306457	0.20433	-1.49982	0.133662	0.437354	FALSE	FALSE	inactive	'1-2	75	53	84	37	58	62	254	71.3185	54.3666	61.9293	51.7316	53.2195	45.7299	141.332
chr2	139962593	139963093	62.8038	-0.25684	0.213791	-1.20136	0.22961	0.565775	FALSE	FALSE	inactive	'1-2	75	44	63	32	65	75	141	71.3185	45.1345	46.447	44.7408	59.6425	55.3185	78.4558
chr2	142656835	142657335	28.8172	-0.277085	0.400635	-0.691616	0.489179	0.771578	TRUE	FALSE	not-induced	'1-2	55	29	42	17	39	58	60	52.3002	29.7478	30.9646	23.7686	35.7855	42.7796	33.3855
chr2	147272082	147272582	46.6069	0.271995	0.219781	1.23757	0.215875	0.550157	FALSE	FALSE	inactive	'1-2	39	56	70	34	64	95	137	37.0856	57.4439	51.6077	47.5372	58.725	70.0701	76.2302
chr2	149566600	149567100	161.17	-0.101157	0.149682	-0.675812	0.49916	0.777977	FALSE	FALSE	inactive	'1-2	197	165	215	100	195	237	633	187.33	169.254	158.509	139.815	178.928	174.806	352.217
chr2	151906357	151906857	297.277	0.0221808	0.167717	0.132252	0.894785	0.961619	FALSE	FALSE	inactive	'1-2	232	206	337	169	252	356	448	220.612	211.312	248.454	236.288	231.229	262.578	249.278
chr2	152425594	152426094	373.874	-0.063335	0.107489	-0.589223	0.555712	0.809342	FALSE	FALSE	inactive	'1-2	454	363	551	279	446	579	941	431.715	372.36	406.227	390.084	409.24	427.059	523.595
chr2	152866945	152867445	532.344	-0.057986	0.101511	-0.571231	0.567843	0.814011	FALSE	FALSE	inactive	'1-2	816	699	954	487	662	828	1252	775.945	717.024	703.34	680.9	607.436	610.716	696.643
chr2	155711709	155712209	85.1299	-0.353236	0.147281	-2.39838	0.0164677	0.108513	TRUE	TRUE	not-induced	'1-2	209	145	243	92	173	191	79	198.741	148.739	179.153	128.63	158.741	140.878	43.9575
chr2	157197009	157197509	100.041	0.0263561	0.162	0.162692	0.870761	0.951621	FALSE	FALSE	inactive	'1-2	85	81	95	55	87	101	202	80.8277	83.0886	70.0391	76.8983	79.8292	74.4955	112.398
chr2	158296870	158297370	233.803	-0.0639049	0.12476	-0.512224	0.608494	0.833973	FALSE	FALSE	inactive	'1-2	288	224	376	172	268	390	518	273.863	229.776	277.207	240.482	245.911	287.656	288.228
chr2	158638899	158639399	264.811	-0.0044358	0.163564	-0.0271196	0.978364	0.993441	FALSE	FALSE	inactive	'1-2	307	203	285	153	204	353	646	291.93	208.234	210.117	213.917	187.186	260.366	359.45
chr2	159940167	159940589	158.913	-0.399469	0.150916	-2.64696	0.00812197	0.0603932	TRUE	TRUE	not-induced	'1-2	325	184	345	147	310	331	242	309.047	188.744	254.352	205.528	284.449	244.139	134.655
chr2	164120943	164121443	51.8337	0.195975	0.246004	0.796632	0.425665	0.732705	FALSE	FALSE	inactive	'1-2	68	75	59	29	54	81	145	64.6621	76.9339	43.4979	40.5464	49.5492	59.7439	80.6815
chr2	164180943	164181443	153.134	-0.33554	0.181971	-1.84392	0.0651954	0.293422	TRUE	TRUE	not-induced	'1-2	424	248	330	162	279	315	180	403.187	254.395	243.294	226.501	256.004	232.338	100.156
chr2	164634670	164635170	550.614	-0.344409	0.15429	-2.23221	0.0256009	0.154134	TRUE	FALSE	not-induced	'1-2	418	307	503	191	430	447	579	397.482	314.916	370.838	267.047	394.558	329.698	322.17
chr2	165170617	165171117	121.237	-0.0796349	0.188543	-0.42237	0.672755	0.864927	FALSE	FALSE	inactive	'1-2	140	92	190	86	148	228	335	133.128	94.3722	140.078	120.241	135.801	168.168	186.402
chr2	169347357	169347857	69.1588	-0.246271	0.245617	-1.00266	0.316023	0.651352	TRUE	TRUE	not-induced	'1-2	88	52	109	53	114	131	132	83.6804	53.3408	80.3606	74.102	104.604	96.6229	73.448
chr2	171594324	171594824	365.424	-0.104732	0.156823	-0.667834	0.50424	0.781631	FALSE	FALSE	inactive	'1-2	220	217	317	149	277	294	432	209.201	222.595	233.709	208.325	254.169	216.848	240.375
chr2	172380481	172380981	268.639	-0.117791	0.144481	-0.815271	0.414917	0.727872	FALSE	FALSE	inactive	'1-2	277	242	389	176	257	315	507	263.403	248.24	286.792	246.075	235.817	232.338	282.107
chr2	173292809	173293309	1009.39	0.210966	0.262723	0.802997	0.421977	0.73067	FALSE	TRUE	not-induced	'1-2	686	1032	1469	551	912	1555	1594	652.327	1058.61	1083.03	770.381	836.831	1146.94	886.941
chr2	173816415	173816915	363.72	-0.0711499	0.123201	-0.577512	0.563594	0.812546	FALSE	FALSE	inactive	'1-2	357	359	514	254	414	441	1503	339.476	368.257	378.948	355.13	379.877	325.273	836.306
chr2	175648891	175649391	300.039	-0.0997877	0.117667	-0.848051	0.396409	0.715599	FALSE	FALSE	inactive	'1-2	331	272	369	211	348	369	713	314.752	279.013	272.046	295.01	319.317	272.167	396.731
chr2	178586481	178587252	240.507	0.0776467	0.1246	0.62317	0.533173	0.796389	FALSE	FALSE	inactive	'1-2	162	162	216	130	195	234	404	154.048	166.177	159.247	181.76	178.928	172.594	224.795
chr2	182695211	182695711	278.381	-0.0876728	0.124093	-0.706509	0.479871	0.765582	FALSE	FALSE	inactive	'1-2	334	299	417	185	268	346	703	317.605	306.71	307.435	258.658	245.911	255.203	391.166
chr2	183943238	183943879	842.545	0.0691505	0.104358	0.662629	0.507568	0.78394	TRUE	TRUE	not-induced	'1-2	603	585	769	378	662	940	745	573.401	600.084	566.948	528.501	607.436	693.325	414.536
chr2	184816356	184816856	208.928	0.0656713	0.15905	0.412898	0.679681	0.868522	TRUE	TRUE	not-induced	'1-2	269	235	283	190	269	323	367	255.796	241.059	208.643	265.649	246.828	238.238	204.208
chr2	193234668	193235168	246.716	-0.288401	0.126493	-2.27998	0.0226088	0.14001	FALSE	FALSE	inactive	'1-2	383	261	386	168	300	340	709	364.2	267.73	284.58	234.889	275.273	250.777	394.505
chr2	202204483	202204983	446.932	-0.0266779	0.108597	-0.245659	0.805947	0.922482	FALSE	FALSE	inactive	'1-2	560	412	599	318	505	725	1277	532.512	422.623	441.615	444.612	463.377	534.745	710.554
chr2	204201631	204202131	61.1992	0.134347	0.201499	0.666741	0.504937	0.781988	FALSE	TRUE	not-induced	'1-2	84	77	74	54	73	90	131	79.8767	78.9854	54.5567	75.5002	66.9831	66.3822	72.8916
chr2	206525399	206525899	340.618	0.00996931	0.141018	0.0706955	0.94364	0.979673	FALSE	FALSE	inactive	'1-2	380	360	492	278	384	447	1144	361.347	369.282	362.729	388.686	352.35	329.698	636.55
chr2	206591195	206591695	318.707	-0.0335026	0.0968315	-0.345988	0.729352	0.889846	FALSE	FALSE	inactive	'1-2	420	349	527	291	409	509	851	399.384	357.999	388.532	406.862	375.289	375.428	473.517
chr2	208675456	208677797	1207.02	-0.190761	0.0842349	-2.26463	0.0235352	0.144682	FALSE	FALSE	inactive	'1-2	1704	1217	1899	911	1604	1905	2931	1620.36	1248.38	1400.04	1273.72	1471.79	1405.09	1630.88
chr2	211909759	211910259	73.0387	-0.0682066	0.202428	-0.336943	0.736159	0.892437	TRUE	TRUE	not-induced	'1-2	137	94	155	85	158	207	58	130.275	96.4238	114.274	118.843	144.977	152.679	32.2726
chr2	217864420	217864920	32.7878	0.427168	0.295431	1.44591	0.148201	0.45998	FALSE	FALSE	inactive	'1-2	18	34	36	34	32	28	97	17.1164	34.8767	26.5411	47.5372	29.3625	20.6522	53.9732
chr2	217866543	217867043	456.981	-0.180453	0.122233	-1.4763	0.139862	0.447303	FALSE	FALSE	inactive	'1-2	577	526	745	294	536	610	1371	548.677	539.563	549.254	411.057	491.821	449.923	762.858
chr2	217911926	217913245	827.762	-0.102373	0.100192	-1.02176	0.306893	0.643497	FALSE	FALSE	inactive	'1-2	1076	926	1234	614	959	1102	2467	1023.18	949.877	909.771	858.465	879.957	812.813	1372.7
chr2	218205007	218205278	73.56	-0.0903448	0.208024	-0.434299	0.664071	0.861143	FALSE	FALSE	inactive	'1-2	100	97	120	53	85	98	196	95.0914	99.5011	88.4704	74.102	77.9941	72.2828	109.059
chr2	218568772	218569199	255.426	-0.0476881	0.133184	-0.35806	0.720298	0.886058	FALSE	FALSE	inactive	'1-2	223	252	355	159	269	296	461	212.054	258.498	261.725	222.306	246.828	218.324	256.512
chr2	222067844	222068344	97.9303	-0.117001	0.163378	-0.716136	0.473907	0.761393	FALSE	FALSE	inactive	'1-2	125	79	133	81	124	149	293	118.864	81.037	98.0547	113.25	113.78	109.899	163.032
chr2	223667415	223667915	277.904	-0.0659362	0.12381	-0.53256	0.594339	0.826401	FALSE	FALSE	inactive	'1-2	372	284	457	216	324	470	629	353.74	291.323	336.925	302.001	297.295	346.662	349.991
chr2	223707170	223707670	52.181	-0.125319	0.224597	-0.557973	0.576863	0.818878	FALSE	FALSE	inactive	'1-2	57	51	63	30	43	48	168	54.2021	52.315	46.447	41.9445	39.4558	35.4038	93.4793
chr2	225043043	225043543	269.605	-0.321566	0.127817	-2.51582	0.0118755	0.0830354	FALSE	FALSE	inactive	'1-2	329	288	430	164	372	339	937	312.851	295.426	317.019	229.297	341.339	250.039	521.37
chr2	227575495	227575995	174.978	-0.0427236	0.136075	-0.313971	0.753543	0.900611	FALSE	FALSE	inactive	'1-2	161	160	250	134	231	248	454	153.097	164.126	184.313	187.352	211.96	182.92	252.617
chr2	227725818	227726318	357.718	-0.134576	0.149532	-0.899985	0.368128	0.694249	FALSE	FALSE	inactive	'1-2	485	358	536	277	455	548	1033	461.193	367.231	395.168	387.288	417.498	404.194	574.786
chr2	231227875	231228375	61.8086	-0.0278922	0.193635	-0.144045	0.885465	0.956938	FALSE	FALSE	inactive	'1-2	85	76	89	51	83	93	221	80.8277	77.9596	65.6155	71.3057	76.1589	68.5949	122.97
chr2	231578411	231578911	2954.53	-0.0985657	0.071792	-1.37293	0.169773	0.489333	TRUE	TRUE	not-induced	'1-2	2594	2117	3327	1560	2503	3227	3913	2466.67	2171.59	2452.84	2181.12	2296.7	2380.17	2177.29
chr2	233944070	233944570	847.855	0.10697	0.115544	0.925795	0.354553	0.682657	FALSE	FALSE	inactive	'1-2	361	363	509	333	411	478	1507	343.28	372.36	375.262	465.584	377.124	352.563	838.532
chr2	234369416	234370119	7291.46	-0.126073	0.0773245	-1.63044	0.103009	0.382216	TRUE	TRUE	not-induced	'1-2	9250	7501	11305	5640	8640	10014	9198	8795.95	7694.41	8334.65	7885.57	7927.87	7386.12	5117.99
chr2	234990817	234991412	552.381	0.0142069	0.123097	0.115412	0.908119	0.964798	FALSE	FALSE	inactive	'1-2	447	452	592	290	432	545	884	425.058	463.655	436.454	405.464	396.393	401.981	491.879
chr2	237662308	237663398	964.987	-0.0406628	0.0907883	-0.447886	0.654235	0.855189	FALSE	FALSE	inactive	'1-2	1121	1005	1423	780	1062	1211	2222	1065.97	1030.91	1049.11	1090.56	974.467	893.209	1236.38
chr2	238530049	238530549	941.305	-0.15786	0.108914	-1.4494	0.147226	0.458664	TRUE	FALSE	not-induced	'1-2	1301	1012	1303	613	1113	1332	1751	1237.14	1038.09	960.641	857.067	1021.26	982.456	974.299
chr2	238596185	238596716	539.239	-0.0927812	0.110464	-0.839923	0.400951	0.718585	TRUE	TRUE	not-induced	'1-2	682	665	1033	499	882	952	1089	648.523	682.147	761.583	697.678	809.303	702.176	605.946
chr2	239552774	239553274	1063.72	-0.1502	0.20818	-0.72149	0.470608	0.760364	TRUE	TRUE	not-induced	'1-2	1019	808	1527	737	1407	1614	1245	968.981	828.834	1125.79	1030.44	1291.03	1190.45	692.748
chr2	239970370	239970870	167.123	-0.0206346	0.162803	-0.126746	0.899142	0.963207	FALSE	FALSE	inactive	'1-2	126	127	235	120	162	193	505	119.815	130.275	173.255	167.778	148.648	142.353	280.994
chr2	240169018	240170130	3081.74	-0.113641	0.0773748	-1.46871	0.141911	0.450267	TRUE	FALSE	not-induced	'1-2	1908	1636	2367	1176	1962	2211	3012	1814.34	1678.18	1745.08	1644.23	1800.29	1630.79	1675.95
chr2	241088320	241088820	1831.05	-0.103594	0.0589051	-1.75866	0.0786345	0.327259	TRUE	FALSE	not-induced	'1-2	1818	1562	2407	1227	1837	2072	3031	1728.76	1602.28	1774.57	1715.53	1685.59	1528.26	1686.52
chr20	2225210	2226959	482.449	-0.28835	0.115112	-2.50495	0.012247	0.0852161	FALSE	FALSE	inactive	'1-2	529	367	596	281	568	576	1055	503.033	376.463	439.403	392.881	521.184	424.846	587.028
chr20	6375150	6375650	203.888	-0.0790601	0.142056	-0.556542	0.577841	0.819534	TRUE	FALSE	not-induced	'1-2	220	193	251	116	203	252	337	209.201	197.976	185.051	162.186	186.268	185.87	187.515
chr20	8122751	8123251	225.913	0.401743	0.156538	2.56642	0.0102754	0.0738332	FALSE	FALSE	inactive	'1-2	132	245	219	133	198	248	491	125.521	251.317	161.458	185.954	181.68	182.92	273.204
chr20	14688925	14689236	29.4664	-1.06552	0.303851	-3.50673	0.000453654	0.00457784	FALSE	FALSE	inactive	'1-2	40	17	49	16	40	20	117	38.0365	17.4383	36.1254	22.3704	36.7031	14.7516	65.1017
chr20	14819926	14820426	86.1604	-0.0122786	0.215121	-0.0570778	0.954483	0.984451	FALSE	FALSE	inactive	'1-2	88	72	114	63	87	114	225	83.6804	73.8565	84.0469	88.0835	79.8292	84.0841	125.196
chr20	18084103	18084603	124.973	0.285817	0.164321	1.73938	0.0819682	0.335697	TRUE	TRUE	not-induced	'1-2	161	158	179	120	124	213	218	153.097	162.074	131.968	167.778	113.78	157.104	121.301
chr20	19005306	19005806	509.084	-0.0367052	0.0985026	-0.372631	0.709423	0.881324	FALSE	FALSE	inactive	'1-2	564	539	815	425	649	742	1168	536.315	552.898	600.861	594.214	595.508	547.284	649.904
chr20	19690397	19691374	398.146	-0.0566209	0.108104	-0.523766	0.600442	0.830179	FALSE	FALSE	inactive	'1-2	494	440	579	297	442	525	1009	469.751	451.345	426.87	415.251	405.569	387.229	561.432
chr20	19945029	19945848	1063.66	-0.0681204	0.0729306	-0.934044	0.350281	0.679592	TRUE	TRUE	not-induced	'1-2	1157	1034	1562	803	1285	1481	1958	1100.21	1060.66	1151.59	1122.72	1179.09	1092.36	1089.48
chr20	20529280	20530891	892.852	-0.232616	0.132752	-1.75226	0.079729	0.330018	TRUE	TRUE	not-induced	'1-2	1579	1312	2147	987	2184	2170	702	1501.49	1345.83	1582.88	1379.98	2003.99	1600.55	390.61
chr20	20803997	20804497	2423.16	-0.215991	0.091236	-2.36739	0.0179139	0.115595	TRUE	TRUE	not-induced	'1-2	3090	2303	3735	1680	2743	3194	3659	2938.32	2362.38	2753.64	2348.89	2516.91	2355.83	2035.96
chr20	22203906	22204406	283.014	-0.132722	0.124201	-1.06861	0.285246	0.623277	TRUE	FALSE	not-induced	'1-2	221	195	283	140	233	248	367	210.152	200.028	208.643	195.741	213.796	182.92	204.208
chr20	22276726	22277226	972.431	0.527414	0.0916775	5.75293	8.77088e-09	1.42841e-07	TRUE	TRUE	not-induced	'1-2	1217	1563	1484	1236	1172	1995	1799	1157.26	1603.3	1094.08	1728.12	1075.4	1471.47	1001.01
chr20	23374672	23375172	9869.89	-0.0662775	0.43815	-0.151267	0.879765	0.954603	FALSE	FALSE	inactive	'1-2	2824	2077	3154	1729	2218	2958	5284	2685.38	2130.55	2325.3	2417.4	2035.19	2181.76	2940.15
chr20	26143929	26144429	286.328	-0.278908	0.130123	-2.14342	0.0320796	0.182316	FALSE	FALSE	inactive	'1-2	392	263	447	238	368	353	713	372.758	269.781	329.552	332.76	337.668	260.366	396.731
chr20	31214951	31215451	3493.46	-0.139411	0.0710418	-1.96238	0.0497179	0.24676	TRUE	TRUE	not-induced	'1-2	3397	2951	4649	2153	3663	4147	4260	3230.25	3027.09	3427.49	3010.22	3361.09	3058.74	2370.37
chr20	31331026	31331526	6917.91	0.152628	0.242594	0.629153	0.529249	0.795056	FALSE	TRUE	not-induced	'1-2	3751	4074	5517	2583	3920	6362	7235	3566.88	4179.05	4067.43	3611.43	3596.9	4692.48	4025.73
chr20	32038757	32039257	119.912	-0.0862986	0.184364	-0.468089	0.639721	0.848205	FALSE	FALSE	inactive	'1-2	131	113	153	69	147	181	393	124.57	115.914	112.8	96.4725	134.884	133.502	218.675
chr20	32778397	32778897	310.815	-0.233706	0.126437	-1.84839	0.0645454	0.291607	FALSE	FALSE	inactive	'1-2	344	279	481	208	370	396	744	327.114	286.194	354.619	290.816	339.504	292.081	413.98
chr20	34380610	34381101	908.584	-0.0387204	0.0836995	-0.462611	0.643643	0.850046	FALSE	FALSE	inactive	'1-2	1218	991	1387	769	1145	1428	2386	1158.21	1016.55	1022.57	1075.18	1050.63	1053.26	1327.63
chr20	34671006	34671502	141.226	0.51373	0.141784	3.62332	0.000290846	0.00302899	TRUE	TRUE	not-induced	'1-2	130	207	203	133	140	242	140	123.619	212.337	149.662	185.954	128.461	178.494	77.8994
chr20	39577094	39577590	137.455	0.934869	0.162348	5.75842	8.4907e-09	1.38911e-07	TRUE	TRUE	not-induced	'1-2	113	265	213	199	160	328	91	107.453	271.833	157.035	278.232	146.812	241.926	50.6346
chr20	39903847	39904347	405.011	-0.254569	0.101176	-2.5161	0.0118661	0.0830104	FALSE	FALSE	inactive	'1-2	462	380	595	244	463	487	889	439.322	389.798	438.666	341.149	424.838	359.201	494.661
chr20	41814466	41814966	316.069	-0.293774	0.110357	-2.66204	0.00776682	0.0581455	FALSE	FALSE	inactive	'1-2	423	283	497	240	414	424	1102	402.236	290.297	366.415	335.556	379.877	312.734	613.18
chr20	43391086	43391569	650.957	0.0200956	0.134806	0.149071	0.881498	0.955192	FALSE	FALSE	inactive	'1-2	434	357	521	276	379	552	748	412.696	366.205	384.109	385.89	347.762	407.144	416.205
chr20	43976649	43977149	4295.44	-0.0795207	0.0918631	-0.865643	0.386686	0.707785	TRUE	TRUE	not-induced	'1-2	5165	4246	6533	3189	5466	6956	5494	4911.47	4355.48	4816.48	4458.71	5015.48	5130.6	3057
chr20	45591876	45594656	4231.35	-0.119076	0.0561614	-2.12024	0.0339861	0.190207	FALSE	FALSE	inactive	'1-2	5050	4194	6122	2992	4874	5704	8464	4802.11	4302.14	4513.46	4183.27	4472.27	4207.15	4709.58
chr20	45768476	45768976	612.34	-0.0579387	0.0900299	-0.64355	0.519867	0.790618	TRUE	TRUE	not-induced	'1-2	660	536	795	413	650	824	936	627.603	549.821	586.116	577.437	596.425	607.766	520.813
chr20	46438062	46438561	1906.37	-0.271661	0.128197	-2.11909	0.0340829	0.19031	TRUE	TRUE	not-induced	'1-2	3046	2086	3766	1745	3524	3788	1392	2896.48	2139.79	2776.5	2439.77	3233.54	2793.95	774.543
chr20	46758047	46758547	215.593	0.0925603	0.124128	0.745684	0.455858	0.750852	FALSE	FALSE	inactive	'1-2	243	233	287	142	231	343	630	231.072	239.008	211.592	198.538	211.96	252.99	350.547
chr20	46867082	46868088	845.653	-0.0454193	0.106643	-0.425902	0.670179	0.863932	FALSE	FALSE	inactive	'1-2	635	624	950	428	670	843	1242	603.83	640.09	700.391	598.409	614.777	621.78	691.079
chr20	48856556	48857056	346.413	-0.0584945	0.116399	-0.502535	0.615291	0.836589	FALSE	FALSE	inactive	'1-2	387	342	439	232	363	419	999	368.004	350.818	323.654	324.371	333.081	309.046	555.868
chr20	48899951	48901664	7820.55	0.115626	0.0866111	1.335	0.181876	0.509463	TRUE	TRUE	not-induced	'1-2	6864	6523	8580	5170	7200	9712	9098	6527.07	6691.19	6325.63	7228.44	6606.56	7163.37	5062.35
chr20	49067304	49068449	1908.07	-0.218201	0.0834899	-2.6135	0.00896196	0.0659192	FALSE	FALSE	inactive	'1-2	1460	1112	1746	787	1493	1665	2435	1388.33	1140.67	1287.24	1100.35	1369.94	1228.07	1354.89
chr20	49356183	49356683	343.392	-0.111561	0.112844	-0.988631	0.322844	0.657521	FALSE	FALSE	inactive	'1-2	210	167	274	144	208	244	1309	199.692	171.306	202.007	201.334	190.856	179.969	728.36
chr20	49360897	49361397	446.069	-0.35347	0.17053	-2.07278	0.0381931	0.205647	FALSE	FALSE	inactive	'1-2	925	522	853	450	1045	1033	1582	879.595	535.46	628.877	629.168	958.868	761.92	880.263
chr20	50449926	50450426	588.784	-0.0411334	0.0905673	-0.454175	0.649703	0.853585	TRUE	TRUE	not-induced	'1-2	639	590	904	421	649	844	849	607.634	605.213	666.477	588.622	595.508	622.517	472.404
chr20	59358015	59358515	289.329	0.325845	0.214874	1.51644	0.129407	0.431498	FALSE	FALSE	inactive	'1-2	76	120	129	73	128	176	904	72.2694	123.094	95.1057	102.065	117.45	129.814	503.008
chr20	61737402	61737902	877.351	-0.129872	0.081875	-1.58623	0.112688	0.400328	TRUE	FALSE	not-induced	'1-2	994	777	1204	604	972	1149	1543	945.208	797.035	887.653	844.483	891.885	847.479	858.563
chr21	11115583	11116083	656.358	0.0892092	0.215959	0.413083	0.679546	0.868504	FALSE	FALSE	inactive	'1-2	580	498	690	415	571	805	5355	551.53	510.841	508.705	580.233	523.937	593.752	2979.65
chr21	14897298	14897798	1260.78	0.109915	0.0862561	1.27428	0.202564	0.535566	TRUE	TRUE	not-induced	'1-2	1192	1219	1600	873	1184	1627	1783	1133.49	1250.43	1179.61	1220.59	1086.41	1200.04	992.105
chr21	16315370	16316292	220.908	0.0681799	0.145749	0.467789	0.639936	0.848205	FALSE	FALSE	inactive	'1-2	198	200	298	175	219	264	599	188.281	205.157	219.701	244.677	200.949	194.721	333.298
chr21	16353503	16354003	151.805	0.0973073	0.166274	0.585222	0.558399	0.810282	FALSE	FALSE	inactive	'1-2	173	196	236	98	178	263	493	164.508	201.054	173.992	137.019	163.329	193.983	274.317
chr21	16579607	16580672	1683.21	-0.0553778	0.0692475	-0.799708	0.42388	0.731305	FALSE	FALSE	inactive	'1-2	1971	1796	2589	1247	1981	2443	4203	1874.25	1842.31	1908.75	1743.49	1817.72	1801.91	2338.65
chr21	17959550	17960050	200.429	-0.357696	0.1744	-2.05101	0.0402659	0.213823	TRUE	FALSE	not-induced	'1-2	162	109	183	84	199	184	265	154.048	111.811	134.917	117.445	182.598	135.715	147.452
chr21	18461409	18461909	15.686	0.0325115	0.439997	0.0738904	0.941098	0.978887	TRUE	TRUE	not-induced	'1-2	11	5	25	21	25	27	27	10.46	5.12892	18.4313	29.3612	22.9394	19.9146	15.0235
chr21	25828701	25829201	526.808	-0.0684279	0.114726	-0.596448	0.550876	0.807151	FALSE	FALSE	inactive	'1-2	574	595	806	344	626	733	1267	545.824	610.342	594.226	480.964	574.403	540.646	704.99
chr21	26100270	26100770	187.696	0.11767	0.151801	0.775159	0.438246	0.739818	FALSE	FALSE	inactive	'1-2	136	120	154	107	130	167	400	129.324	123.094	113.537	149.602	119.285	123.176	222.57
chr21	26106882	26107382	22.7322	0.129542	0.330748	0.391665	0.695306	0.873961	FALSE	FALSE	inactive	'1-2	25	24	28	19	25	31	55	23.7728	24.6188	20.6431	26.5649	22.9394	22.865	30.6033
chr21	37489510	37489873	211.966	-0.227183	0.145406	-1.5624	0.118193	0.410802	TRUE	TRUE	not-induced	'1-2	219	163	259	135	198	197	294	208.25	167.203	190.949	188.75	181.68	145.303	163.589
chr21	38091810	38092310	776.587	-0.170458	0.095056	-1.79323	0.0729354	0.312153	TRUE	FALSE	not-induced	'1-2	867	801	1236	524	916	998	1457	824.442	821.654	911.245	732.631	840.501	736.104	810.71
chr21	38382111	38382611	791.22	-0.169294	0.108271	-1.56361	0.117908	0.410312	TRUE	TRUE	not-induced	'1-2	1152	1018	1434	633	1148	1247	1599	1095.45	1044.25	1057.22	885.03	1053.38	919.762	889.723
chr21	40824302	40824802	1961.15	0.0456981	0.172011	0.265669	0.790494	0.917614	TRUE	TRUE	not-induced	'1-2	432	438	522	268	437	555	592	410.795	449.294	384.846	374.705	400.981	409.357	329.403
chr21	41058573	41059436	756.433	-0.0653233	0.0983674	-0.664075	0.506642	0.783326	FALSE	FALSE	inactive	'1-2	801	768	970	518	815	840	1778	761.682	787.803	715.136	724.242	747.826	619.567	989.323
chr21	41109602	41110102	619.268	-0.135517	0.15828	-0.856186	0.391895	0.712215	TRUE	TRUE	not-induced	'1-2	578	476	900	456	730	801	665	549.628	488.274	663.528	637.557	669.831	590.801	370.022
chr21	41248535	41249035	109.145	-0.045533	0.211306	-0.215484	0.82939	0.932735	FALSE	FALSE	inactive	'1-2	148	78	113	92	113	148	282	140.735	80.0112	83.3096	128.63	103.686	109.162	156.912
chr21	41291865	41292365	25.6066	0.146635	0.398255	0.368194	0.712728	0.882351	FALSE	FALSE	inactive	'1-2	16	10	18	5	14	34	157	15.2146	10.2578	13.2706	6.99076	12.8461	25.0777	87.3586
chr21	41776200	41776700	191.19	-0.036254	0.161403	-0.224618	0.822277	0.929171	FALSE	FALSE	inactive	'1-2	233	199	334	162	208	290	453	221.563	204.131	246.243	226.501	190.856	213.898	252.06
chr21	43433997	43434497	1260.97	-0.182082	0.106288	-1.7131	0.0866935	0.346847	FALSE	FALSE	inactive	'1-2	1799	1476	2067	985	1727	1838	4909	1710.69	1514.06	1523.9	1377.18	1584.66	1355.67	2731.49
chr21	43654547	43655047	9515.81	0.469522	0.927484	0.506232	0.612694	0.835566	TRUE	TRUE	not-induced	'1-2	1867	10105	15243	3000	7026	16792	2920	1775.36	10365.6	11238	4194.45	6446.9	12385.4	1624.76
chr21	44232746	44233025	7.58868	0.24074	0.587926	0.409473	0.682192	0.869245	TRUE	TRUE	not-induced	'1-2	2	4	12	3	6	14	4	1.90183	4.10314	8.84704	4.19445	5.50546	10.3261	2.2257
chr21	44375441	44375941	894.236	-0.428848	0.153729	-2.78964	0.00527671	0.041649	TRUE	TRUE	not-induced	'1-2	1099	696	1273	522	1026	988	641	1045.05	713.946	938.523	729.835	941.434	728.729	356.668
chr21	45170147	45170647	2708.53	-0.0356139	0.088897	-0.400619	0.6887	0.872035	TRUE	TRUE	not-induced	'1-2	3619	2744	4538	2518	3466	4599	4951	3441.36	2814.75	3345.66	3520.55	3180.32	3392.13	2754.86
chr21	46783797	46784375	10760.1	-0.176148	0.186283	-0.945592	0.344357	0.675255	TRUE	TRUE	not-induced	'1-2	6849	5286	9311	4783	9783	10403	3980	6512.81	5422.3	6864.57	6687.36	8976.66	7673.04	2214.57
chr22	19412367	19412867	722.093	-0.125763	0.0754727	-1.66634	0.0956455	0.366265	FALSE	FALSE	inactive	'1-2	878	721	1122	567	877	996	1814	834.902	739.591	827.198	792.752	804.715	734.629	1009.35
chr22	21150968	21151468	1324.16	-0.111283	0.107646	-1.03378	0.301237	0.638151	FALSE	FALSE	inactive	'1-2	1195	1058	1448	665	1160	1365	2796	1136.34	1085.28	1067.54	929.771	1064.39	1006.8	1555.76
chr22	21235492	21235992	450.572	-0.0220248	0.182079	-0.120963	0.90372	0.964317	FALSE	FALSE	inactive	'1-2	203	192	230	158	269	249	463	193.035	196.951	169.568	220.908	246.828	183.657	257.625
chr22	21790460	21790960	1.0995	0.239199	1.97739	0.120967	0.903717	0.964317	FALSE	FALSE	inactive	'1-2	0	0	1	0	0	1	4	0	0	0.737253	0	0	0.73758	2.2257
chr22	22089974	22090314	262.612	0.656548	0.903763	0.72646	0.467557	0.75811	FALSE	FALSE	inactive	'1-2	72	423	473	101	247	596	1187	68.4658	433.907	348.721	141.213	226.642	439.597	660.476
chr22	23466857	23467357	2639.54	-0.130574	0.0868976	-1.50262	0.132936	0.436249	TRUE	TRUE	not-induced	'1-2	2136	1873	2786	1292	2233	2540	2792	2031.15	1921.29	2053.99	1806.41	2048.95	1873.45	1553.54
chr22	23773224	23773737	2766.87	0.0593302	0.123292	0.481218	0.630362	0.844005	FALSE	FALSE	inactive	'1-2	3539	3217	4072	2292	3085	4176	5842	3365.28	3299.95	3002.1	3204.56	2830.73	3080.13	3250.63
chr22	26052767	26053267	440.702	0.0399247	0.0944753	0.422594	0.672592	0.864873	FALSE	FALSE	inactive	'1-2	411	396	501	278	424	523	1030	390.825	406.211	369.364	388.686	389.053	385.754	573.117
chr22	26187079	26188657	1344.72	-0.0907892	0.0682524	-1.3302	0.183453	0.511444	FALSE	FALSE	inactive	'1-2	1617	1439	2037	915	1541	1921	3045	1537.63	1476.1	1501.78	1279.31	1413.99	1416.89	1694.31
chr22	26366342	26366842	607.819	-0.067821	0.1153	-0.588215	0.556388	0.809464	TRUE	TRUE	not-induced	'1-2	692	607	945	451	799	995	1078	658.032	622.651	696.704	630.566	733.144	733.892	599.826
chr22	26966064	26966560	578.612	-0.122086	0.0951448	-1.28316	0.199437	0.530563	FALSE	FALSE	inactive	'1-2	697	587	824	393	617	727	1295	662.787	602.136	607.497	549.474	566.145	536.22	720.57
chr22	27848967	27849467	426.671	-0.0560425	0.102514	-0.546683	0.584596	0.822103	FALSE	FALSE	inactive	'1-2	588	482	711	383	593	725	978	559.137	494.428	524.187	535.492	544.123	534.745	544.183
chr22	28831369	28831869	154.898	-0.251798	0.13528	-1.8613	0.0627012	0.286534	FALSE	FALSE	inactive	'1-2	172	146	217	103	197	178	327	163.557	149.765	159.984	144.01	180.763	131.289	181.951
chr22	29213992	29216076	2061.1	-0.0154704	0.161869	-0.0955738	0.923859	0.971047	TRUE	TRUE	not-induced	'1-2	2508	2092	3186	1860	2307	2760	3209	2384.89	2145.94	2348.89	2600.56	2116.85	2035.72	1785.57
chr22	29525441	29525941	867.558	-0.0962977	0.0845945	-1.13834	0.254977	0.591581	FALSE	FALSE	inactive	'1-2	1046	813	1120	585	1004	1224	1935	994.656	833.963	825.724	817.919	921.248	902.797	1076.68
chr22	29706840	29707290	2361.36	-0.150392	0.0929401	-1.61816	0.105628	0.386791	TRUE	TRUE	not-induced	'1-2	2733	2198	3314	1701	3069	3314	3746	2598.85	2254.67	2443.26	2378.26	2816.04	2444.34	2084.37
chr22	30133817	30134317	2637.7	0.190022	0.150606	1.26171	0.207053	0.54067	TRUE	TRUE	not-induced	'1-2	1899	1997	2602	1545	2004	2899	2724	1805.78	2048.49	1918.33	2160.14	1838.83	2138.24	1515.7
chr22	30267713	30268213	329.446	-0.049988	0.117121	-0.426805	0.669521	0.863809	FALSE	FALSE	inactive	'1-2	276	263	444	213	319	391	863	262.452	269.781	327.34	297.806	292.707	288.394	480.194
chr22	30432632	30433132	494.083	-0.122593	0.124703	-0.983081	0.325568	0.660044	TRUE	TRUE	not-induced	'1-2	623	551	903	480	857	872	785	592.419	565.207	665.74	671.113	786.364	643.169	436.793
chr22	32072685	32073185	1090.51	-0.0243958	0.125449	-0.194468	0.84581	0.939403	TRUE	TRUE	not-induced	'1-2	1239	1127	1810	951	1628	1968	2015	1178.18	1156.06	1334.43	1329.64	1493.82	1451.56	1121.2
chr22	32128120	32128620	345.671	-0.189876	0.125384	-1.51436	0.129935	0.43188	FALSE	FALSE	inactive	'1-2	447	353	497	254	409	418	954	425.058	362.102	366.415	355.13	375.289	308.308	530.829
chr22	33248423	33248760	189.849	-0.164318	0.128365	-1.28008	0.200516	0.532142	FALSE	FALSE	inactive	'1-2	243	203	299	116	200	261	488	231.072	208.234	220.439	162.186	183.515	192.508	271.535
chr22	33695248	33696615	1837.03	-0.0856063	0.0972156	-0.880582	0.378544	0.702414	FALSE	FALSE	inactive	'1-2	1353	1166	1751	889	1448	1684	3862	1286.59	1196.06	1290.93	1242.96	1328.65	1242.08	2148.91
chr22	34529314	34529814	206.791	-0.0433706	0.125992	-0.344233	0.730671	0.890264	TRUE	TRUE	not-induced	'1-2	248	220	315	148	241	316	351	235.827	225.673	232.235	206.926	221.136	233.075	195.305
chr22	35640338	35640838	1.13439	2.03377	1.59099	1.2783	0.201142	0.533308	FALSE	TRUE	NULL	'1-2	0	0	0	1	1	3	2	0	0	0	1.39815	0.917577	2.21274	1.11285
chr22	35952743	35953243	326.779	-0.106377	0.117697	-0.903823	0.366089	0.692245	TRUE	TRUE	not-induced	'1-2	431	400	592	295	431	458	625	409.844	410.314	436.454	412.455	395.476	337.811	347.765
chr22	35992807	35993307	269.653	-0.136753	0.124746	-1.09625	0.272968	0.610824	FALSE	FALSE	inactive	'1-2	278	261	423	175	370	426	897	264.354	267.73	311.858	244.677	339.504	314.209	499.113
chr22	36018425	36019549	2493.1	-0.204331	0.0978437	-2.08834	0.036767	0.200202	FALSE	FALSE	inactive	'1-2	2710	1962	3129	1538	2676	2989	6098	2576.98	2012.59	2306.87	2150.36	2455.44	2204.63	3393.08
chr22	36369957	36370457	153.534	-0.288967	0.165831	-1.74254	0.081414	0.334139	FALSE	FALSE	inactive	'1-2	166	150	256	102	151	144	330	157.852	153.868	188.737	142.611	138.554	106.211	183.62
chr22	36728732	36729232	386.261	-0.0746247	0.0969069	-0.770066	0.441261	0.741955	FALSE	FALSE	inactive	'1-2	407	343	514	278	446	510	1167	387.022	351.844	378.948	388.686	409.24	376.166	649.347
chr22	36767257	36767757	149.999	-0.128485	0.182645	-0.703472	0.481762	0.76669	FALSE	FALSE	inactive	'1-2	184	197	235	88	212	227	360	174.968	202.08	173.255	123.037	194.526	167.431	200.313
chr22	37585119	37585615	454.009	0.506509	0.188798	2.68281	0.00730072	0.0553515	TRUE	TRUE	not-induced	'1-2	423	580	642	450	404	745	504	402.236	594.955	473.317	629.168	370.701	549.497	280.438
chr22	37934782	37935282	1151.23	-0.0984872	0.0787956	-1.24991	0.211334	0.544873	FALSE	FALSE	inactive	'1-2	1519	1362	1853	922	1566	1735	2797	1444.44	1397.12	1366.13	1289.1	1436.93	1279.7	1556.32
chr22	38636845	38637345	547.574	-0.0503673	0.182854	-0.27545	0.78297	0.913538	TRUE	TRUE	not-induced	'1-2	373	321	448	217	381	493	575	354.691	329.277	330.289	303.399	349.597	363.627	319.944
chr22	39131596	39132096	1462.74	-0.172677	0.119364	-1.44664	0.147997	0.459606	TRUE	TRUE	not-induced	'1-2	1421	1166	1832	867	1494	1634	2107	1351.25	1196.06	1350.65	1212.2	1370.86	1205.2	1172.39
chr22	40635123	40635623	1724.56	-0.0972146	0.106208	-0.915322	0.360023	0.686121	TRUE	TRUE	not-induced	'1-2	2536	1904	2990	1683	2589	3025	2833	2411.52	1953.09	2204.39	2353.09	2375.61	2231.18	1576.35
chr22	40781336	40781836	516.783	0.0168048	0.114579	0.146666	0.883396	0.95577	FALSE	FALSE	inactive	'1-2	561	557	707	370	608	733	1389	533.463	571.362	521.238	517.316	557.887	540.646	772.874
chr22	41670745	41671245	841.464	-0.129468	0.0936866	-1.38193	0.166994	0.485828	FALSE	FALSE	inactive	'1-2	1058	874	1313	589	891	1128	1821	1006.07	896.536	968.014	823.511	817.561	831.99	1013.25
chr22	43523495	43523995	2758.26	-0.118149	0.0749045	-1.57733	0.114719	0.404194	TRUE	TRUE	not-induced	'1-2	3137	2625	3941	1874	3153	3760	4429	2983.02	2692.68	2905.52	2620.14	2893.12	2773.3	2464.4
chr22	45000416	45000916	268.478	0.0727905	0.289963	0.251034	0.801788	0.921277	FALSE	FALSE	inactive	'1-2	177	113	182	116	187	296	2102	168.312	115.914	134.18	162.186	171.587	218.324	1169.6
chr22	45080582	45081082	1627.6	-0.113745	0.115301	-0.986507	0.323885	0.658406	TRUE	TRUE	not-induced	'1-2	2256	1813	2657	1272	2353	2905	2448	2145.26	1859.75	1958.88	1778.45	2159.06	2142.67	1362.13
chr22	45337141	45337594	1229.26	-0.0494615	0.11215	-0.441029	0.659192	0.85806	TRUE	TRUE	not-induced	'1-2	1154	1030	1416	770	1173	1327	1426	1097.35	1056.56	1043.95	1076.58	1076.32	978.768	793.461
chr22	45351018	45351518	2176.2	1.19058	0.104541	11.3887	4.75843e-30	4.17428e-28	TRUE	TRUE	induced	'1-2	1777	4358	2164	2602	1822	4349	2143	1689.77	4470.37	1595.42	3637.99	1671.83	3207.73	1192.42
chr22	46769614	46771853	10855.6	-0.0835176	0.0715479	-1.1673	0.243091	0.578867	FALSE	FALSE	inactive	'1-2	12067	10234	15123	7559	11990	14462	20294	11474.7	10497.9	11149.5	10568.6	11001.8	10666.9	11292.1
chr22	46959407	46959907	3166.45	-0.126121	0.10869	-1.16037	0.245896	0.581932	TRUE	FALSE	not-induced	'1-2	2985	2467	3500	1709	2945	3414	4699	2838.48	2530.61	2580.39	2389.44	2702.27	2518.1	2614.64
chr22	48656941	48657441	1093.57	-0.087047	0.235208	-0.370085	0.711319	0.88184	FALSE	FALSE	inactive	'1-2	1667	1135	1715	895	1416	2018	4295	1585.17	1164.27	1264.39	1251.35	1299.29	1488.44	2389.84
chr22	50425139	50425639	39.9983	0.113904	0.296931	0.383604	0.701272	0.876263	FALSE	FALSE	inactive	'1-2	55	46	42	30	33	46	127	52.3002	47.1861	30.9646	41.9445	30.2801	33.9287	70.6659
chr22	50446428	50447091	998.6	-0.141289	0.0752738	-1.877	0.0605186	0.281234	FALSE	FALSE	inactive	'1-2	882	722	1221	571	915	1086	2322	838.706	740.617	900.186	798.344	839.583	801.011	1292.02
chr22	50647758	50648074	5260.32	0.223859	0.083737	2.67336	0.00750965	0.056755	TRUE	TRUE	not-induced	'1-2	3896	3887	5016	3268	3560	5309	4191	3704.76	3987.23	3698.06	4569.16	3266.58	3915.81	2331.97
chr3	2904086	2904586	14.2114	-0.313331	0.435989	-0.718666	0.472347	0.761073	FALSE	FALSE	inactive	'1-2	19	20	27	7	11	12	36	18.0674	20.5157	19.9058	9.78706	10.0934	8.85095	20.0313
chr3	4590444	4590944	78.4983	-0.133374	0.199078	-0.669956	0.502886	0.78105	FALSE	FALSE	inactive	'1-2	73	53	89	33	65	98	167	69.4167	54.3666	65.6155	46.139	59.6425	72.2828	92.9229
chr3	4622588	4623038	385.923	-0.115659	0.10573	-1.09391	0.273996	0.612068	FALSE	FALSE	inactive	'1-2	467	376	597	284	409	518	1037	444.077	385.695	440.14	397.075	375.289	382.066	577.012
chr3	4757857	4758357	15.2811	0.70505	0.404567	1.74273	0.0813815	0.334101	FALSE	TRUE	not-induced	'1-2	8	20	25	18	16	30	36	7.60731	20.5157	18.4313	25.1667	14.6812	22.1274	20.0313
chr3	4796278	4799599	1603.22	-0.0955338	0.0778623	-1.22696	0.219838	0.553524	FALSE	FALSE	inactive	'1-2	1901	1652	2239	1047	1812	2203	3942	1807.69	1694.6	1650.71	1463.86	1662.65	1624.89	2193.43
chr3	5668513	5669013	34.9061	0.0922881	0.255265	0.361539	0.717697	0.884532	FALSE	FALSE	inactive	'1-2	38	45	63	29	50	67	96	36.1347	46.1603	46.447	40.5464	45.8789	49.4178	53.4167
chr3	8540679	8541442	720.628	-0.247184	0.0941267	-2.62608	0.00863744	0.0638939	FALSE	FALSE	inactive	'1-2	664	530	770	335	631	655	1496	631.407	543.666	567.685	468.381	578.991	483.115	832.411
chr3	8547302	8547802	456.601	-0.132437	0.109981	-1.20418	0.228518	0.564559	FALSE	FALSE	inactive	'1-2	310	270	400	204	376	392	591	294.783	276.962	294.901	285.223	345.009	289.131	328.847
chr3	9212414	9212914	1789.02	-0.241449	0.132625	-1.82053	0.0686779	0.302814	TRUE	TRUE	not-induced	'1-2	1257	1013	1631	676	1258	1381	1577	1195.3	1039.12	1202.46	945.15	1154.31	1018.6	877.481
chr3	9294632	9295321	266.003	-0.00509239	0.144624	-0.0352112	0.971911	0.990899	FALSE	FALSE	inactive	'1-2	261	243	250	154	252	266	673	248.188	249.266	184.313	215.315	231.229	196.196	374.474
chr3	9441387	9441887	158.783	0.0657312	0.172541	0.380961	0.703232	0.877763	FALSE	FALSE	inactive	'1-2	163	157	166	98	142	174	465	154.999	161.048	122.384	137.019	130.296	128.339	258.737
chr3	12342507	12343006	105.474	0.0311282	0.210402	0.147946	0.882385	0.955405	FALSE	FALSE	inactive	'1-2	103	95	97	63	85	93	207	97.9441	97.4495	71.5136	88.0835	77.9941	68.5949	115.18
chr3	13621715	13622215	1336	-0.124347	0.0807847	-1.53924	0.123745	0.421427	TRUE	FALSE	not-induced	'1-2	1430	1261	1803	868	1595	1758	2420	1359.81	1293.51	1329.27	1213.6	1463.54	1296.66	1346.55
chr3	16468862	16469330	433.878	-0.0588435	0.137801	-0.427017	0.669367	0.863809	FALSE	FALSE	inactive	'1-2	461	381	451	295	450	455	988	438.371	390.824	332.501	412.455	412.91	335.599	549.747
chr3	16619842	16620342	194.079	0.0472126	0.163379	0.288975	0.7726	0.909133	FALSE	FALSE	inactive	'1-2	260	211	287	231	282	283	613	247.238	216.441	211.592	322.973	258.757	208.735	341.088
chr3	18202738	18203188	322.888	0.506091	0.192623	2.62737	0.00860481	0.0636854	FALSE	TRUE	not-induced	'1-2	83	140	139	102	132	195	193	78.9258	143.61	102.478	142.611	121.12	143.828	107.39
chr3	18881971	18882471	85.7058	-0.158716	0.291451	-0.544572	0.586048	0.822674	FALSE	FALSE	inactive	'1-2	71	80	147	52	97	112	236	67.5149	82.0628	108.376	72.7039	89.005	82.6089	131.316
chr3	19124332	19124832	21.5079	-0.707982	0.402484	-1.75903	0.0785724	0.327171	FALSE	FALSE	inactive	'1-2	28	12	24	17	31	14	57	26.6256	12.3094	17.6941	23.7686	28.4449	10.3261	31.7162
chr3	25593731	25594114	889.789	0.796196	0.205097	3.88204	0.000103583	0.00115533	TRUE	TRUE	not-induced	'1-2	386	735	687	629	635	1215	433	367.053	753.952	506.493	879.437	582.662	896.159	240.932
chr3	27353417	27353917	184.289	0.141511	0.129117	1.09599	0.273084	0.610891	FALSE	FALSE	inactive	'1-2	182	212	248	129	210	277	582	173.066	217.466	182.839	180.362	192.691	204.31	323.839
chr3	27386994	27388440	305.622	-0.139004	0.10539	-1.31895	0.187187	0.516874	FALSE	FALSE	inactive	'1-2	320	296	439	209	378	393	846	304.292	303.632	323.654	292.214	346.844	289.869	470.735
chr3	30395843	30397632	480.143	0.00911324	0.0936145	0.0973485	0.92245	0.97036	FALSE	FALSE	inactive	'1-2	502	513	707	362	573	682	1255	477.359	526.228	521.238	506.131	525.772	503.029	698.313
chr3	31135523	31136023	110.162	0.020221	0.24534	0.0824202	0.934313	0.975947	FALSE	FALSE	inactive	'1-2	98	132	149	64	134	142	242	93.1895	135.404	109.851	89.4817	122.955	104.736	134.655
chr3	31267340	31267840	572.705	-0.20358	0.118157	-1.72296	0.0848962	0.342531	FALSE	FALSE	inactive	'1-2	594	559	878	362	604	622	1448	564.843	573.414	647.308	506.131	554.217	458.774	805.703
chr3	32433140	32433640	1966.21	0.219091	0.229202	0.955885	0.33913	0.670894	FALSE	FALSE	inactive	'1-2	1331	1940	2572	995	1733	2912	3593	1265.67	1990.02	1896.22	1391.16	1590.16	2147.83	1999.23
chr3	37664486	37664986	350.502	-0.173585	0.110411	-1.57217	0.115911	0.406594	FALSE	FALSE	inactive	'1-2	407	313	546	291	420	438	795	387.022	321.071	402.54	406.862	385.382	323.06	442.357
chr3	41144690	41145190	456.931	-0.0552018	0.0891549	-0.619168	0.535806	0.79818	FALSE	FALSE	inactive	'1-2	498	410	562	315	465	551	960	473.555	420.572	414.336	440.418	426.673	406.406	534.167
chr3	41276165	41276665	16.9956	0.209107	0.393066	0.531988	0.594734	0.826524	FALSE	FALSE	inactive	'1-2	20	14	11	14	13	16	35	19.0183	14.361	8.10979	19.5741	11.9285	11.8013	19.4749
chr3	41722902	41723788	584.476	0.0692798	0.190736	0.363224	0.716437	0.883869	FALSE	FALSE	inactive	'1-2	357	338	436	243	319	427	675	339.476	346.715	321.442	339.751	292.707	314.946	375.587
chr3	41729895	41730248	58.9825	0.119934	0.255262	0.469847	0.638464	0.848073	FALSE	FALSE	inactive	'1-2	59	81	58	33	72	66	124	56.1039	83.0886	42.7607	46.139	66.0656	48.6802	68.9966
chr3	42922274	42922680	3974.98	-0.212498	0.072348	-2.93717	0.00331224	0.0275709	TRUE	TRUE	not-induced	'1-2	3951	3081	5016	2300	3962	4333	3824	3757.06	3160.44	3698.06	3215.75	3635.44	3195.93	2127.77
chr3	46032814	46033314	725.868	-0.0859284	0.0850924	-1.00982	0.31258	0.64831	FALSE	FALSE	inactive	'1-2	738	690	1040	464	755	921	1789	701.774	707.791	766.743	648.742	692.771	679.311	995.443
chr3	46172403	46172903	411.331	-0.0353309	0.0885728	-0.398891	0.689973	0.872035	TRUE	TRUE	not-induced	'1-2	492	428	643	312	452	608	694	467.849	439.036	474.054	436.223	414.745	448.448	386.159
chr3	47347359	47347859	51.3951	0.121286	0.297756	0.407334	0.683763	0.869976	FALSE	FALSE	inactive	'1-2	53	59	103	45	59	99	174	50.3984	60.5213	75.9371	62.9168	54.1371	73.0204	96.8179
chr3	47426569	47427069	413.391	-0.15123	0.104855	-1.44227	0.149227	0.461761	FALSE	FALSE	inactive	'1-2	554	450	675	365	569	579	1033	526.806	461.603	497.646	510.325	522.102	427.059	574.786
chr3	48507113	48507475	3785.03	-0.0722954	0.157266	-0.4597	0.645731	0.851735	TRUE	TRUE	not-induced	'1-2	2043	1715	2983	1554	2207	2626	1785	1942.72	1759.22	2199.23	2172.73	2025.09	1936.88	993.218
chr3	49475012	49475512	226.866	0.203546	0.148209	1.37337	0.169637	0.48914	TRUE	TRUE	not-induced	'1-2	188	200	293	155	210	343	346	178.772	205.157	216.015	216.713	192.691	252.99	192.523
chr3	49639437	49639937	961.561	1.75103	0.207669	8.43184	3.40283e-17	1.08853e-15	TRUE	TRUE	induced	'1-2	665	2754	1208	2389	1282	3963	494	632.358	2825.01	890.602	3340.18	1176.33	2923.03	274.874
chr3	50204836	50205215	4935.38	0.196368	0.0952142	2.06238	0.0391713	0.2097	TRUE	TRUE	not-induced	'1-2	2195	1985	2511	1729	2082	3051	1346	2087.26	2036.18	1851.24	2417.4	1910.4	2250.36	748.947
chr3	50329488	50329988	13076	-0.0879592	0.102124	-0.861294	0.389076	0.709527	TRUE	TRUE	not-induced	'1-2	8771	7074	10789	5806	10071	11724	6725	8340.46	7256.4	7954.23	8117.67	9240.92	8647.38	3741.95
chr3	52279945	52280470	1920.32	0.284037	0.185588	1.53047	0.125901	0.425592	FALSE	FALSE	inactive	'1-2	1447	1955	2290	1116	1669	2749	3594	1375.97	2005.41	1688.31	1560.34	1531.44	2027.61	1999.79
chr3	53143796	53144296	172.939	0.194034	0.124116	1.56333	0.117976	0.410407	FALSE	FALSE	inactive	'1-2	171	180	193	120	160	222	486	162.606	184.641	142.29	167.778	146.812	163.743	270.422
chr3	53798371	53798871	1582.86	-0.102929	0.0866152	-1.18835	0.234697	0.570296	FALSE	FALSE	inactive	'1-2	1870	1505	2265	1084	1741	2215	3977	1778.21	1543.81	1669.88	1515.6	1597.5	1633.74	2212.9
chr3	56505032	56505532	305.906	-0.107453	0.115786	-0.928027	0.353394	0.68225	FALSE	FALSE	inactive	'1-2	410	357	543	245	386	479	781	389.875	366.205	400.329	342.547	354.185	353.301	434.568
chr3	56852898	56853697	108.967	0.179938	0.19651	0.915667	0.359842	0.686043	FALSE	FALSE	inactive	'1-2	143	150	163	83	91	156	308	135.981	153.868	120.172	116.047	83.4995	115.062	171.379
chr3	60728594	60730070	400.702	-0.148087	0.143034	-1.03533	0.300516	0.637737	FALSE	FALSE	inactive	'1-2	333	297	465	213	373	409	874	316.654	304.658	342.823	297.806	342.256	301.67	486.315
chr3	61613396	61613896	110.587	0.195345	0.15924	1.22673	0.219924	0.553546	FALSE	FALSE	inactive	'1-2	105	120	153	76	110	173	319	99.8459	123.094	112.8	106.26	100.934	127.601	177.499
chr3	64068601	64069045	292.998	0.40774	0.152009	2.68235	0.00731068	0.0553977	FALSE	TRUE	not-induced	'1-2	223	354	348	241	280	363	569	212.054	363.128	256.564	336.955	256.922	267.741	316.606
chr3	64174789	64175289	453.328	-0.102305	0.0867624	-1.17914	0.238341	0.574019	TRUE	TRUE	not-induced	'1-2	519	447	679	337	597	681	856	493.524	458.526	500.595	471.177	547.794	502.292	476.299
chr3	65674898	65675433	153.181	0.408516	0.137078	2.98017	0.0028809	0.0242899	FALSE	TRUE	not-induced	'1-2	138	179	194	133	146	237	324	131.226	183.615	143.027	185.954	133.966	174.806	180.282
chr3	66456168	66456633	954.844	0.259726	0.0729754	3.55909	0.000372135	0.00380899	TRUE	TRUE	not-induced	'1-2	871	1071	1204	765	1014	1364	997	828.246	1098.62	887.653	1069.59	930.423	1006.06	554.755
chr3	66706924	66707431	163.204	-0.0317268	0.138337	-0.229345	0.818601	0.927916	TRUE	TRUE	not-induced	'1-2	209	193	242	126	234	272	262	198.741	197.976	178.415	176.167	214.713	200.622	145.783
chr3	66835514	66836014	192.73	-0.141764	0.150294	-0.943245	0.345555	0.676214	FALSE	FALSE	inactive	'1-2	192	182	354	127	199	276	451	182.575	186.693	260.988	177.565	182.598	203.572	250.947
chr3	69228271	69228771	225.766	-0.0718856	0.116759	-0.615675	0.538109	0.799881	FALSE	FALSE	inactive	'1-2	183	181	298	129	214	265	389	174.017	185.667	219.701	180.362	196.362	195.459	216.449
chr3	71375714	71376214	247.555	-0.170178	0.121053	-1.40582	0.159777	0.475871	FALSE	FALSE	inactive	'1-2	244	233	348	170	281	262	756	232.023	239.008	256.564	237.686	257.839	193.246	420.657
chr3	71744086	71744586	244.064	0.0503424	0.126871	0.3968	0.691515	0.87234	FALSE	FALSE	inactive	'1-2	253	231	324	209	243	282	584	240.581	236.956	238.87	292.214	222.971	207.997	324.952
chr3	73502507	73503444	278.707	0.364066	0.206515	1.7629	0.0779168	0.32577	FALSE	FALSE	inactive	'1-2	160	288	190	120	214	223	446	152.146	295.426	140.078	167.778	196.362	164.48	248.165
chr3	73578332	73578832	262.272	-0.0761506	0.11915	-0.639113	0.522749	0.792487	FALSE	FALSE	inactive	'1-2	250	261	344	188	316	293	917	237.728	267.73	253.615	262.852	289.954	216.111	510.241
chr3	75718485	75718985	21.4585	-0.418902	0.434579	-0.963927	0.335083	0.667877	TRUE	TRUE	not-induced	'1-2	18	25	53	7	25	31	17	17.1164	25.6446	39.0744	9.78706	22.9394	22.865	9.45922
chr3	75998184	75998684	249.858	-0.0888573	0.140021	-0.634599	0.52569	0.793193	FALSE	FALSE	inactive	'1-2	259	208	367	195	297	350	686	246.287	213.363	270.572	272.64	272.52	258.153	381.707
chr3	77704516	77704928	802.07	0.596207	0.128352	4.64508	3.3994e-06	4.43503e-05	FALSE	TRUE	not-induced	'1-2	648	928	965	811	736	1287	1365	616.192	951.928	711.449	1133.9	675.337	949.265	759.519
chr3	83926819	83927319	294.435	0.00716642	0.122205	0.0586426	0.953237	0.984211	FALSE	FALSE	inactive	'1-2	332	345	508	201	351	510	677	315.703	353.896	374.525	281.028	322.07	376.166	376.699
chr3	88107930	88108759	10867.9	-0.0812614	0.104837	-0.77512	0.438268	0.739818	TRUE	TRUE	not-induced	'1-2	12126	9953	15231	7759	12197	14959	7544	11530.8	10209.6	11229.1	10848.3	11191.7	11033.5	4197.67
chr3	95179115	95179615	152.853	0.0419468	0.175681	0.238767	0.811287	0.924971	FALSE	FALSE	inactive	'1-2	127	157	209	101	166	188	378	120.766	161.048	154.086	141.213	152.318	138.665	210.328
chr3	95911922	95912201	338.574	0.216123	0.180969	1.19426	0.232378	0.568709	TRUE	TRUE	not-induced	'1-2	332	355	567	339	408	612	230	315.703	364.154	418.023	473.973	374.372	451.399	127.978
chr3	98303516	98303939	267.048	0.28082	0.161458	1.73928	0.0819854	0.335697	FALSE	TRUE	not-induced	'1-2	193	224	234	147	159	240	361	183.526	229.776	172.517	205.528	145.895	177.019	200.869
chr3	99565265	99565765	64.6844	0.00326237	0.180371	0.018087	0.985569	0.99563	TRUE	TRUE	not-induced	'1-2	76	75	89	49	91	101	111	72.2694	76.9339	65.6155	68.5094	83.4995	74.4955	61.7631
chr3	101547873	101548373	259.527	-0.00911362	0.125564	-0.0725816	0.942139	0.979258	FALSE	FALSE	inactive	'1-2	269	287	412	186	268	338	631	255.796	294.4	303.748	260.056	245.911	249.302	351.104
chr3	101607414	101607914	234.053	0.115228	0.145409	0.792437	0.428106	0.734346	FALSE	FALSE	inactive	'1-2	187	250	275	158	229	228	487	177.821	256.446	202.745	220.908	210.125	168.168	270.979
chr3	104859865	104860365	132.096	-0.0219989	0.157481	-0.139693	0.888903	0.958532	FALSE	FALSE	inactive	'1-2	156	135	158	81	161	201	287	148.343	138.481	116.486	113.25	147.73	148.253	159.694
chr3	105084314	105084814	223.059	-0.113087	0.151607	-0.745916	0.455718	0.750802	FALSE	FALSE	inactive	'1-2	296	246	352	175	256	301	669	281.47	252.343	259.513	244.677	234.9	222.011	372.248
chr3	110478784	110479284	15.2245	0.244633	0.445576	0.549026	0.582988	0.821504	FALSE	FALSE	inactive	'1-2	12	27	27	8	19	25	51	11.411	27.6962	19.9058	11.1852	17.434	18.4395	28.3776
chr3	112958540	112959040	438.64	0.0258042	0.119174	0.216526	0.828578	0.932574	FALSE	FALSE	inactive	'1-2	400	478	651	301	483	567	845	380.365	490.325	479.952	420.844	443.19	418.208	470.179
chr3	116952776	116953151	59.9947	0.86913	0.212453	4.09093	4.2964e-05	0.000499872	FALSE	TRUE	not-induced	'1-2	29	83	61	46	53	98	127	27.5765	85.1401	44.9724	64.315	48.6316	72.2828	70.6659
chr3	117849883	117850373	245.187	0.329213	0.285756	1.15208	0.249289	0.585414	TRUE	TRUE	not-induced	'1-2	131	143	149	147	255	318	156	124.57	146.687	109.851	205.528	233.982	234.55	86.8022
chr3	120154424	120154858	458.472	0.118826	0.104283	1.13946	0.254512	0.591079	TRUE	TRUE	not-induced	'1-2	435	432	517	324	489	613	630	413.647	443.139	381.16	453.001	448.695	452.136	350.547
chr3	121661264	121661943	353.089	-0.0505469	0.157561	-0.320808	0.748356	0.898434	FALSE	FALSE	inactive	'1-2	199	167	296	165	222	261	555	189.232	171.306	218.227	230.695	203.702	192.508	308.816
chr3	122757355	122758569	824.767	-0.0329374	0.084914	-0.387891	0.698096	0.875191	FALSE	FALSE	inactive	'1-2	1050	969	1443	676	1048	1375	2027	998.459	993.985	1063.86	945.15	961.621	1014.17	1127.87
chr3	123420014	123420514	328.039	-0.0953033	0.122356	-0.778901	0.436038	0.738063	FALSE	FALSE	inactive	'1-2	306	286	445	181	289	380	733	290.98	293.374	328.078	253.065	265.18	280.28	407.859
chr3	124480164	124480664	209.172	0.0110486	0.171971	0.0642468	0.948774	0.98182	FALSE	FALSE	inactive	'1-2	242	245	339	192	315	347	588	230.121	251.317	249.929	268.445	289.037	255.94	327.178
chr3	124882935	124883639	1635.61	-0.0700437	0.0727506	-0.962792	0.335652	0.668545	TRUE	TRUE	not-induced	'1-2	1988	1827	2626	1217	1901	2347	3124	1890.42	1874.11	1936.03	1701.55	1744.31	1731.1	1738.27
chr3	124926133	124927404	2625.09	-0.0966061	0.08753	-1.10369	0.269727	0.606889	FALSE	FALSE	inactive	'1-2	2486	2288	3352	1512	2535	3029	4708	2363.97	2347	2471.27	2114.01	2326.06	2234.13	2619.65
chr3	130414086	130414586	11.133	0.0896206	0.460063	0.194801	0.845549	0.939403	FALSE	FALSE	inactive	'1-2	11	13	21	7	10	19	40	10.46	13.3352	15.4823	9.78706	9.17577	14.014	22.257
chr3	141120906	141121864	6792.73	0.190338	0.428055	0.444659	0.656566	0.856714	TRUE	TRUE	not-induced	'1-2	2199	3119	4362	1734	3010	4857	3351	2091.06	3199.42	3215.9	2424.39	2761.91	3582.42	1864.58
chr3	141145206	141146474	1157.5	0.142771	0.106312	1.34294	0.179291	0.505458	FALSE	FALSE	inactive	'1-2	1011	1144	1312	747	1110	1404	2998	961.374	1173.5	967.276	1044.42	1018.51	1035.56	1668.16
chr3	141659919	141660419	456.539	-0.0855778	0.116924	-0.731912	0.464222	0.756521	TRUE	TRUE	not-induced	'1-2	558	369	555	330	468	609	749	530.61	378.515	409.176	461.39	429.426	449.186	416.762
chr3	143076969	143078576	883.103	-0.0474952	0.074383	-0.638523	0.523134	0.792487	FALSE	FALSE	inactive	'1-2	940	796	1243	695	993	1161	2062	893.859	816.525	916.406	971.715	911.154	856.33	1147.35
chr3	143162473	143163008	410.914	-0.0127623	0.158691	-0.0804224	0.935901	0.976327	TRUE	TRUE	not-induced	'1-2	323	297	408	222	402	475	328	307.145	304.658	300.799	310.39	368.866	350.35	182.507
chr3	149867448	149867717	847.815	0.082959	0.275387	0.301245	0.763228	0.90455	FALSE	FALSE	inactive	'1-2	88	89	76	38	50	70	159	83.6804	91.2948	56.0312	53.1298	45.8789	51.6306	88.4715
chr3	150454997	150456758	786.714	0.884353	0.12592	7.02315	2.16927e-12	4.74287e-11	FALSE	TRUE	not-induced	'1-2	685	1288	958	905	688	1479	1259	651.376	1321.21	706.289	1265.33	631.293	1090.88	700.538
chr3	150480619	150481034	1000.85	0.621608	0.880465	0.705999	0.480188	0.76572	FALSE	FALSE	inactive	'1-2	150	959	1226	311	636	1477	1525	142.637	983.728	903.873	434.825	583.579	1089.4	848.547
chr3	150617869	150618369	399.106	-0.247039	0.101298	-2.43875	0.0147382	0.0991257	FALSE	FALSE	inactive	'1-2	501	370	698	317	505	553	996	476.408	379.54	514.603	443.214	463.377	407.881	554.199
chr3	159708134	159708634	337.167	-0.109008	0.124621	-0.874716	0.381728	0.704723	FALSE	FALSE	inactive	'1-2	349	322	566	232	349	459	752	331.869	330.303	417.285	324.371	320.235	338.549	418.431
chr3	159736571	159737071	272.442	-0.134971	0.128509	-1.05028	0.293589	0.630808	FALSE	FALSE	inactive	'1-2	294	290	413	198	376	369	608	279.569	297.478	304.486	276.834	345.009	272.167	338.306
chr3	160986613	160987113	47.0063	0.129362	0.215376	0.600631	0.548086	0.806201	FALSE	FALSE	inactive	'1-2	51	64	63	32	55	65	109	48.4966	65.6502	46.447	44.7408	50.4668	47.9427	60.6503
chr3	163415997	163416497	3.37946	-1.33832	0.969649	-1.38021	0.167522	0.486648	FALSE	FALSE	inactive	'1-2	3	2	7	1	2	1	9	2.85274	2.05157	5.16077	1.39815	1.83515	0.73758	5.00782
chr3	169587358	169589731	752.383	0.0471678	0.0961524	0.490552	0.623743	0.841126	FALSE	FALSE	inactive	'1-2	754	693	1038	584	727	953	1893	716.989	710.869	765.269	816.52	667.079	702.913	1053.31
chr3	170061682	170061931	309.856	0.581328	0.278541	2.08705	0.0368837	0.200531	TRUE	TRUE	not-induced	'1-2	32	53	67	66	81	115	59	30.4292	54.3666	49.396	92.278	74.3238	84.8216	32.829
chr3	172370643	172371476	2040.91	-0.155997	0.0673783	-2.31524	0.0206	0.129306	TRUE	TRUE	not-induced	'1-2	3251	2510	3858	1943	3251	3676	2380	3091.42	2574.72	2844.32	2716.61	2983.04	2711.34	1324.29
chr3	172403164	172403664	361.078	0.00858473	0.0899731	0.0954145	0.923986	0.971047	TRUE	TRUE	not-induced	'1-2	490	477	670	362	545	647	758	465.948	489.299	493.96	506.131	500.08	477.214	421.77
chr3	177320189	177321152	987.361	-0.109824	0.164566	-0.667359	0.504543	0.781631	FALSE	FALSE	inactive	'1-2	1099	903	1371	728	1381	1536	3231	1045.05	926.284	1010.77	1017.85	1267.17	1132.92	1797.81
chr3	177800161	177800661	312.296	-0.0615826	0.107933	-0.570565	0.568295	0.814187	FALSE	FALSE	inactive	'1-2	318	286	408	193	305	382	629	302.391	293.374	300.799	269.843	279.861	281.755	349.991
chr3	180001034	180001534	203.564	0.137049	0.129978	1.0544	0.291699	0.628732	FALSE	FALSE	inactive	'1-2	211	229	236	133	206	266	511	200.643	234.905	173.992	185.954	189.021	196.196	284.333
chr3	182314448	182314948	191.465	-0.124312	0.253294	-0.490782	0.623581	0.841126	FALSE	FALSE	inactive	'1-2	144	87	169	78	122	193	292	136.932	89.2433	124.596	109.056	111.944	142.353	162.476
chr3	182456890	182457346	266.917	-0.159863	0.125751	-1.27126	0.203636	0.537449	TRUE	FALSE	not-induced	'1-2	292	225	433	207	295	354	509	277.667	230.802	319.231	289.417	270.685	261.103	283.22
chr3	186587190	186587690	174.226	-0.174591	0.14008	-1.24636	0.212632	0.546249	TRUE	FALSE	not-induced	'1-2	207	130	246	139	194	228	322	196.839	133.352	181.364	194.343	178.01	168.168	179.169
chr3	187465760	187466260	134.512	0.0776836	0.142231	0.54618	0.584943	0.822348	FALSE	FALSE	inactive	'1-2	117	116	190	102	147	199	437	111.257	118.991	140.078	142.611	134.884	146.778	243.157
chr3	189744036	189744361	29.2258	0.0546866	0.276023	0.198123	0.842949	0.938659	TRUE	TRUE	not-induced	'1-2	36	26	34	33	51	51	33	34.2329	26.6704	25.0666	46.139	46.7964	37.6166	18.362
chr3	193569819	193570644	739.432	-0.0732704	0.13116	-0.558634	0.576412	0.818754	TRUE	TRUE	not-induced	'1-2	532	426	742	425	592	667	795	505.886	436.984	547.042	594.214	543.206	491.966	442.357
chr3	193740921	193741879	379.096	-0.190082	0.101628	-1.87038	0.0614317	0.283317	FALSE	FALSE	inactive	'1-2	436	376	592	285	509	507	1407	414.598	385.695	436.454	398.473	467.047	373.953	782.889
chr3	194525945	194526357	2835.83	0.722807	0.115001	6.28525	3.27334e-10	5.88748e-09	TRUE	TRUE	not-induced	'1-2	3155	4487	4247	3989	3732	7580	2698	3000.13	4602.7	3131.11	5577.23	3424.4	5590.85	1501.23
chr3	194656265	194656765	88.7945	0.215439	0.225443	0.955628	0.33926	0.671013	FALSE	FALSE	inactive	'1-2	88	97	76	54	91	111	174	83.6804	99.5011	56.0312	75.5002	83.4995	81.8713	96.8179
chr3	195869940	195870376	1239.89	-0.0505825	0.098817	-0.511881	0.608734	0.833973	TRUE	TRUE	not-induced	'1-2	1430	1276	1960	1010	1460	1744	2029	1359.81	1308.9	1445.02	1412.13	1339.66	1286.34	1128.99
chr3	197160412	197160787	178.339	0.164416	0.198743	0.827275	0.408081	0.722888	FALSE	FALSE	inactive	'1-2	145	202	248	132	230	276	438	137.882	207.209	182.839	184.556	211.043	203.572	243.714
chr3	197403414	197403914	633.728	-0.0919211	0.0866286	-1.06109	0.288647	0.625833	FALSE	FALSE	inactive	'1-2	682	556	789	441	688	763	1304	648.523	570.336	581.693	616.585	631.293	562.773	725.577
chr4	1781771	1782271	3362.97	-0.109339	0.103025	-1.06129	0.288559	0.625831	TRUE	FALSE	not-induced	'1-2	2787	2380	3395	1707	2645	2985	4247	2650.2	2441.37	2502.97	2386.64	2426.99	2201.67	2363.13
chr4	2073329	2074108	7825.43	0.00825243	0.16885	0.0488742	0.96102	0.987043	TRUE	TRUE	not-induced	'1-2	4084	3596	4761	2661	4080	5140	6051	3883.53	3688.72	3510.06	3720.48	3743.72	3791.16	3366.92
chr4	3806591	3807091	472.173	-0.0130313	0.106617	-0.122225	0.902721	0.964219	FALSE	FALSE	inactive	'1-2	505	486	636	345	528	600	1266	480.211	498.531	468.893	482.362	484.481	442.548	704.433
chr4	4576973	4577473	6949.24	-0.050197	0.120143	-0.417811	0.676085	0.866405	TRUE	TRUE	not-induced	'1-2	5341	5045	7009	3322	5537	6753	7891	5078.83	5175.08	5167.41	4644.66	5080.63	4980.87	4390.75
chr4	4645435	4645935	0.668514	-0.71232	2.09182	-0.340526	0.733461	0.891361	TRUE	TRUE	not-induced	'1-2	1	0	0	1	1	0	0	0.950914	0	0	1.39815	0.917577	0	0
chr4	4992553	4993504	2547.55	-0.0656467	0.0932589	-0.703919	0.481483	0.766503	TRUE	TRUE	not-induced	'1-2	2558	2247	3460	1751	2703	3228	3371	2432.44	2304.94	2550.9	2448.16	2480.21	2380.91	1875.71
chr4	5132791	5133291	560.161	-0.161987	0.0901372	-1.79712	0.0723169	0.311089	FALSE	FALSE	inactive	'1-2	739	592	917	419	655	783	1573	702.725	607.265	676.061	585.825	601.013	577.525	875.256
chr4	6013398	6013898	1619.03	-0.120551	0.123016	-0.979967	0.327102	0.661222	FALSE	FALSE	inactive	'1-2	986	793	1183	583	996	1185	1764	937.601	813.447	872.171	815.122	913.907	874.032	981.533
chr4	6464858	6465358	1586.19	-0.184905	0.0915597	-2.0195	0.0434353	0.225274	TRUE	FALSE	not-induced	'1-2	1688	1452	2183	978	1652	1772	2505	1605.14	1489.44	1609.42	1367.39	1515.84	1306.99	1393.84
chr4	7636920	7637523	811.173	-0.0514501	0.103386	-0.497653	0.618729	0.838976	FALSE	FALSE	inactive	'1-2	854	753	1058	516	803	1019	2074	812.08	772.416	780.014	721.446	736.815	751.594	1154.02
chr4	8317632	8317939	8556.77	-0.0716102	0.112982	-0.633822	0.526197	0.793265	TRUE	TRUE	not-induced	'1-2	3263	2473	3588	2012	3534	4337	2811	3102.83	2536.77	2645.26	2813.08	3242.72	3198.88	1564.11
chr4	10084046	10084546	1357.08	-0.189772	0.0933013	-2.03397	0.0419551	0.220435	TRUE	FALSE	not-induced	'1-2	1822	1281	2077	983	1529	1900	2614	1732.56	1314.03	1531.28	1374.38	1402.98	1401.4	1454.49
chr4	10658539	10659039	179.605	-0.217884	0.255753	-0.851932	0.394252	0.713777	TRUE	TRUE	not-induced	'1-2	61	61	170	71	95	101	87	58.0057	62.5729	125.333	99.2688	87.1699	74.4955	48.4089
chr4	14899823	14900323	397.424	-0.0792838	0.134385	-0.589977	0.555206	0.809183	FALSE	FALSE	inactive	'1-2	476	371	489	248	381	502	1230	452.635	380.566	360.517	346.742	349.597	370.265	684.402
chr4	22516623	22517123	583.225	0.0047807	0.15183	0.0314872	0.974881	0.992071	FALSE	FALSE	inactive	'1-2	589	732	940	384	654	775	1321	560.088	750.874	693.018	536.89	600.096	571.624	735.037
chr4	25109664	25110164	450.88	-0.1749	0.107466	-1.62749	0.103633	0.382916	TRUE	FALSE	not-induced	'1-2	454	392	621	266	478	543	770	431.715	402.108	457.834	371.908	438.602	400.506	428.447
chr4	26414261	26414761	231.936	-0.147411	0.130978	-1.12547	0.260392	0.597935	FALSE	FALSE	inactive	'1-2	251	251	346	146	262	274	798	238.679	257.472	255.09	204.13	240.405	202.097	444.027
chr4	28618396	28618896	52.1002	-0.214737	0.229791	-0.934491	0.350051	0.679432	TRUE	FALSE	not-induced	'1-2	46	60	88	36	76	59	107	43.742	61.5471	64.8783	50.3335	69.7359	43.5172	59.5374
chr4	30790558	30791353	116.173	0.276138	0.208874	1.32203	0.186158	0.515666	FALSE	FALSE	inactive	'1-2	91	85	137	97	77	129	222	86.5331	87.1917	101.004	135.621	70.6535	95.1478	123.526
chr4	31124913	31125413	109.441	0.407794	0.173865	2.34547	0.0190031	0.121306	FALSE	TRUE	not-induced	'1-2	106	155	125	78	109	161	221	100.797	158.997	92.1567	109.056	100.016	118.75	122.97
chr4	32471636	32472136	9.76563	-0.317399	0.508102	-0.624676	0.532184	0.795846	FALSE	FALSE	inactive	'1-2	8	3	19	7	5	12	27	7.60731	3.07735	14.0078	9.78706	4.58789	8.85095	15.0235
chr4	37893163	37893556	862.021	0.361691	0.1996	1.81208	0.0699745	0.30561	TRUE	TRUE	not-induced	'1-2	966	1057	1255	844	1109	1912	1221	918.582	1084.25	925.253	1180.04	1017.59	1410.25	679.394
chr4	38163856	38164113	363.062	0.0385009	0.191499	0.20105	0.84066	0.93779	TRUE	TRUE	not-induced	'1-2	163	129	267	141	177	271	265	154.999	132.326	196.847	197.139	162.411	199.884	147.452
chr4	38321432	38321932	199.215	-0.264666	0.135758	-1.94954	0.0512313	0.251565	FALSE	FALSE	inactive	'1-2	182	158	282	117	231	228	374	173.066	162.074	207.905	163.584	211.96	168.168	208.103
chr4	38575931	38577040	1858.26	0.0797268	0.0763439	1.04431	0.296342	0.633897	TRUE	TRUE	not-induced	'1-2	1764	1703	2240	1321	1886	2381	2629	1677.41	1746.91	1651.45	1846.96	1730.55	1756.18	1462.84
chr4	39229916	39230416	158.577	-0.118786	0.182229	-0.651849	0.514499	0.786826	FALSE	FALSE	inactive	'1-2	123	98	178	107	153	152	444	116.962	100.527	131.231	149.602	140.389	112.112	247.052
chr4	40406113	40406481	417.432	0.0529767	0.122091	0.433912	0.664353	0.861204	FALSE	TRUE	not-induced	'1-2	365	352	489	280	363	451	647	347.083	361.076	360.517	391.482	333.081	332.648	360.007
chr4	40623103	40624148	1425.61	-0.0998446	0.0904374	-1.10402	0.269585	0.606864	FALSE	FALSE	inactive	'1-2	1320	1072	1643	901	1515	1680	2655	1255.21	1099.64	1211.31	1259.73	1390.13	1239.13	1477.31
chr4	40672521	40673021	188.586	-0.157395	0.167131	-0.941748	0.346322	0.676777	FALSE	FALSE	inactive	'1-2	221	200	242	113	197	200	559	210.152	205.157	178.415	157.991	180.763	147.516	311.041
chr4	48781184	48782847	4094.66	-0.0291598	0.105177	-0.277245	0.781592	0.912698	TRUE	TRUE	not-induced	'1-2	3533	3269	5129	2437	3705	4839	5430	3359.58	3353.29	3781.37	3407.3	3399.62	3569.15	3021.38
chr4	52708611	52709846	4331.47	-0.0291958	0.120062	-0.243174	0.807871	0.92369	TRUE	TRUE	not-induced	'1-2	4762	4582	6499	3268	5527	6551	7918	4528.25	4700.15	4791.41	4569.16	5071.45	4831.88	4405.77
chr4	56915048	56915548	1431.34	0.388432	0.658854	0.589557	0.555488	0.809263	FALSE	FALSE	inactive	'1-2	743	1745	2150	572	1123	2384	3005	706.529	1789.99	1585.09	799.743	1030.44	1758.39	1672.06
chr4	58370289	58370789	108.911	0.0222785	0.200334	0.111207	0.911452	0.966184	FALSE	FALSE	inactive	'1-2	89	85	140	72	118	152	252	84.6313	87.1917	103.215	100.667	108.274	112.112	140.219
chr4	59615371	59615824	129.029	-0.288218	0.200016	-1.44097	0.149592	0.462192	FALSE	FALSE	inactive	'1-2	139	84	234	87	152	209	407	132.177	86.1659	172.517	121.639	139.472	154.154	226.465
chr4	61932992	61933431	66.6198	-0.0625647	0.183261	-0.341397	0.732805	0.891083	FALSE	FALSE	inactive	'1-2	75	59	101	48	62	91	196	71.3185	60.5213	74.4626	67.1113	56.8898	67.1197	109.059
chr4	62527532	62528032	778.198	-0.146342	0.123162	-1.18821	0.234752	0.570296	TRUE	TRUE	not-induced	'1-2	823	658	1020	508	722	820	1153	782.602	674.966	751.998	710.261	662.491	604.815	641.557
chr4	68794386	68794751	147.452	1.97343	0.223715	8.82116	1.13282e-18	4.02941e-17	TRUE	TRUE	induced	'1-2	93	515	132	307	144	397	183	88.435	528.279	97.3174	429.233	132.131	292.819	101.826
chr4	72255098	72255598	1869.18	-0.079463	0.262036	-0.303252	0.761698	0.90371	TRUE	TRUE	not-induced	'1-2	1648	1394	1963	950	1758	2196	1639	1567.11	1429.94	1447.23	1328.24	1613.1	1619.72	911.98
chr4	75780947	75781447	460.63	-0.152035	0.137946	-1.10213	0.270406	0.607495	FALSE	FALSE	inactive	'1-2	619	511	705	326	588	678	1171	588.615	524.176	519.764	455.797	539.535	500.079	651.573
chr4	75963871	75964371	266.401	0.161605	0.132685	1.21796	0.223238	0.55835	FALSE	FALSE	inactive	'1-2	184	244	290	165	262	304	478	174.968	250.291	213.803	230.695	240.405	224.224	265.971
chr4	77771251	77771751	193.068	-0.400063	0.118991	-3.36213	0.00077345	0.00746763	FALSE	FALSE	inactive	'1-2	219	145	268	113	228	215	401	208.25	148.739	197.584	157.991	209.208	158.58	223.126
chr4	81206248	81206628	1734.34	2.22665	0.214935	10.3597	3.78281e-25	2.1723e-23	TRUE	TRUE	induced	'1-2	576	2884	718	2141	744	3098	956	547.726	2958.36	529.348	2993.44	682.678	2285.02	531.942
chr4	82407578	82408287	334.9	0.0900023	0.118561	0.759123	0.447779	0.745204	FALSE	FALSE	inactive	'1-2	393	354	494	289	338	479	822	373.709	363.128	364.203	404.066	310.141	353.301	457.381
chr4	88041940	88043757	1113.75	0.00947568	0.074271	0.127583	0.898479	0.96307	FALSE	FALSE	inactive	'1-2	1248	1169	1604	851	1358	1689	2372	1186.74	1199.14	1182.55	1189.83	1246.07	1245.77	1319.84
chr4	88856714	88857214	79.1973	-0.369792	0.188574	-1.96099	0.04988	0.247136	FALSE	FALSE	inactive	'1-2	85	71	140	42	88	98	191	80.8277	72.8307	103.215	58.7224	80.7468	72.2828	106.277
chr4	95586682	95587657	149.615	0.000512165	0.167319	0.00306102	0.997558	0.999795	FALSE	FALSE	inactive	'1-2	162	140	199	104	158	211	373	154.048	143.61	146.713	145.408	144.977	155.629	207.546
chr4	102131386	102131886	112.358	-0.157116	0.178227	-0.881548	0.378021	0.701958	FALSE	FALSE	inactive	'1-2	114	101	157	71	102	115	299	108.404	103.604	115.749	99.2688	93.5929	84.8216	166.371
chr4	103482141	103482471	65.9859	0.337124	0.21377	1.57704	0.114786	0.404266	FALSE	FALSE	inactive	'1-2	46	62	69	55	75	91	168	43.742	63.5987	50.8705	76.8983	68.8183	67.1197	93.4793
chr4	103681048	103681548	613.793	-0.0802252	0.112156	-0.715299	0.474425	0.761796	FALSE	FALSE	inactive	'1-2	655	532	824	439	637	760	2164	622.848	545.717	607.497	613.788	584.497	560.56	1204.1
chr4	106068798	106069298	133.908	-0.322308	0.152701	-2.11071	0.0347976	0.192827	FALSE	FALSE	inactive	'1-2	139	121	178	75	155	131	480	132.177	124.12	131.231	104.861	142.224	96.6229	267.084
chr4	106105773	106106273	103.166	0.0724366	0.195088	0.371303	0.710412	0.881714	FALSE	FALSE	inactive	'1-2	97	115	154	59	108	159	363	92.2386	117.965	113.537	82.4909	99.0984	117.275	201.982
chr4	113973639	113974139	391.848	0.000947555	0.162504	0.00583096	0.995348	0.999074	FALSE	FALSE	inactive	'1-2	457	402	611	359	555	653	935	434.567	412.365	450.462	501.936	509.255	481.639	520.257
chr4	120020235	120020930	88.2287	0.212492	0.185857	1.14331	0.252912	0.589718	FALSE	FALSE	inactive	'1-2	102	112	160	84	97	164	237	96.9932	114.888	117.961	117.445	89.005	120.963	131.873
chr4	124466566	124468800	1948.53	-0.0561287	0.0855982	-0.655723	0.512002	0.786072	FALSE	FALSE	inactive	'1-2	1453	1330	2001	1044	1542	1754	3291	1381.68	1364.29	1475.24	1459.67	1414.9	1293.71	1831.19
chr4	125120949	125121419	61.4151	-0.235878	0.210923	-1.11831	0.263433	0.600433	FALSE	FALSE	inactive	'1-2	72	56	67	36	70	63	192	68.4658	57.4439	49.396	50.3335	64.2304	46.4675	106.833
chr4	129205491	129205991	46.3912	-0.77918	0.33629	-2.31699	0.0205043	0.128819	FALSE	FALSE	inactive	'1-2	64	45	80	15	58	44	142	60.8585	46.1603	58.9803	20.9723	53.2195	32.4535	79.0123
chr4	129274986	129275743	381.61	-0.149906	0.112536	-1.33206	0.182839	0.51084	FALSE	FALSE	inactive	'1-2	302	256	414	186	303	356	835	287.176	262.601	305.223	260.056	278.026	262.578	464.614
chr4	129481988	129482488	312.056	0.0200527	0.12295	0.163097	0.870442	0.951621	FALSE	FALSE	inactive	'1-2	343	278	353	238	333	391	690	326.163	285.168	260.25	332.76	305.553	288.394	383.933
chr4	131070114	131070614	79.6725	-0.268648	0.176676	-1.52057	0.128368	0.430259	TRUE	FALSE	not-induced	'1-2	126	92	113	62	116	103	161	119.815	94.3722	83.3096	86.6854	106.439	75.9707	89.5843
chr4	133848591	133849091	41.1658	-0.371335	0.281094	-1.32103	0.18649	0.515988	FALSE	FALSE	inactive	'1-2	27	38	66	16	50	42	153	25.6747	38.9798	48.6587	22.3704	45.8789	30.9783	85.1329
chr4	133881566	133882066	137.2	-0.106649	0.152457	-0.699535	0.484218	0.767949	FALSE	FALSE	inactive	'1-2	147	134	204	102	147	161	341	139.784	137.455	150.4	142.611	134.884	118.75	189.741
chr4	133967219	133967719	941.884	-0.0515397	0.117845	-0.43735	0.661857	0.859807	FALSE	FALSE	inactive	'1-2	1213	1092	1504	771	1265	1496	3094	1153.46	1120.16	1108.83	1077.97	1160.74	1103.42	1721.58
chr4	135172867	135173367	16.2576	-0.291778	0.411304	-0.709397	0.478078	0.764085	TRUE	FALSE	not-induced	'1-2	34	19	16	7	16	23	30	32.3311	19.4899	11.7961	9.78706	14.6812	16.9643	16.6927
chr4	136496542	136497042	57.9912	0.227927	0.294042	0.775149	0.438252	0.739818	FALSE	FALSE	inactive	'1-2	74	48	66	41	33	91	189	70.3676	49.2377	48.6587	57.3242	30.2801	67.1197	105.164
chr4	141596748	141597248	590.624	0.0419429	0.103	0.407214	0.683851	0.869976	FALSE	FALSE	inactive	'1-2	429	499	609	289	477	565	1018	407.942	511.867	448.987	404.066	437.684	416.732	566.44
chr4	142557810	142558310	5256.83	-0.334116	0.192732	-1.73358	0.0829931	0.337808	TRUE	TRUE	not-induced	'1-2	13203	6897	12159	6470	15978	17048	2048	12554.9	7074.84	8964.26	9046.04	14661.1	12574.3	1139.56
chr4	143012189	143013313	363.766	-0.154814	0.112704	-1.37363	0.169555	0.48904	FALSE	FALSE	inactive	'1-2	360	254	374	216	352	383	1000	342.329	260.549	275.733	302.001	322.987	282.493	556.424
chr4	143522032	143522525	68.5868	-0.50059	0.298989	-1.67427	0.0940767	0.363863	TRUE	TRUE	not-induced	'1-2	219	158	200	96	168	90	51	208.25	162.074	147.451	134.223	154.153	66.3822	28.3776
chr4	144272972	144273629	172.274	-0.252873	0.149594	-1.69039	0.0909539	0.356644	FALSE	FALSE	inactive	'1-2	153	131	180	89	192	165	344	145.49	134.378	132.706	124.435	176.175	121.701	191.41
chr4	145657879	145658231	60.2207	0.811503	0.252697	3.21136	0.00132106	0.0121635	TRUE	TRUE	not-induced	'1-2	28	73	60	55	57	90	46	26.6256	74.8823	44.2352	76.8983	52.3019	66.3822	25.5955
chr4	145924797	145925297	310.473	-0.235351	0.141723	-1.66064	0.0967859	0.369051	FALSE	FALSE	inactive	'1-2	396	270	464	235	390	420	795	376.562	276.962	342.086	328.566	357.855	309.783	442.357
chr4	146782931	146783431	652.209	-0.155416	0.109891	-1.41427	0.157284	0.472777	FALSE	FALSE	inactive	'1-2	737	581	839	421	672	752	1439	700.823	595.981	618.555	588.622	616.612	554.66	800.695
chr4	151086117	151086617	123.246	-0.340242	0.169087	-2.01223	0.0441958	0.227814	FALSE	FALSE	inactive	'1-2	95	76	176	67	129	131	339	90.3368	77.9596	129.757	93.6761	118.367	96.6229	188.628
chr4	151136701	151137188	317.075	-0.268281	0.126513	-2.12059	0.0339563	0.190184	TRUE	TRUE	not-induced	'1-2	403	332	528	214	382	398	519	383.218	340.561	389.27	299.204	350.515	293.557	288.784
chr4	152246648	152247148	924.783	0.230045	0.338312	0.679977	0.496519	0.776279	TRUE	TRUE	not-induced	'1-2	555	828	1152	457	734	1242	987	527.757	849.35	849.316	638.955	673.502	916.074	549.191
chr4	154034548	154035048	1801.06	-0.100492	0.110462	-0.90974	0.36296	0.68901	FALSE	FALSE	inactive	'1-2	2808	2206	3197	1626	2313	2893	4806	2670.17	2262.88	2357	2273.39	2122.36	2133.82	2674.18
chr4	157830439	157830939	9.93246	0.0131936	0.530059	0.0248908	0.980142	0.994116	FALSE	FALSE	inactive	'1-2	7	6	8	3	13	17	42	6.65639	6.15471	5.89803	4.19445	11.9285	12.5389	23.3698
chr4	158192240	158192740	90.7605	-0.460402	0.177076	-2.60002	0.00932177	0.0681949	FALSE	FALSE	inactive	'1-2	114	102	152	54	148	106	289	108.404	104.63	112.062	75.5002	135.801	78.1834	160.807
chr4	159076776	159077276	164.888	-0.102409	0.140748	-0.727602	0.466857	0.757979	TRUE	TRUE	not-induced	'1-2	259	204	301	162	278	320	257	246.287	209.26	221.913	226.501	255.087	236.025	143.001
chr4	163314069	163314569	77.3168	-0.0206565	0.191685	-0.107762	0.914184	0.967144	FALSE	FALSE	inactive	'1-2	95	85	105	78	101	89	158	90.3368	87.1917	77.4116	109.056	92.6753	65.6446	87.9151
chr4	164329203	164329703	10.5111	-0.615081	0.522137	-1.17801	0.238794	0.574348	FALSE	FALSE	inactive	'1-2	8	7	27	8	8	8	23	7.60731	7.18049	19.9058	11.1852	7.34062	5.90064	12.7978
chr4	169490091	169490591	84.5583	0.18721	0.172796	1.08341	0.278625	0.617233	FALSE	FALSE	inactive	'1-2	89	102	125	64	100	148	312	84.6313	104.63	92.1567	89.4817	91.7577	109.162	173.604
chr4	170902426	170902961	1200.19	-0.0262747	0.138113	-0.190241	0.84912	0.941302	FALSE	FALSE	inactive	'1-2	748	658	880	451	691	883	1273	711.283	674.966	648.783	630.566	634.046	651.283	708.328
chr4	175988200	175988819	32.7292	0.156272	0.31454	0.496828	0.61931	0.839132	FALSE	FALSE	inactive	'1-2	28	26	41	26	22	34	131	26.6256	26.6704	30.2274	36.3519	20.1867	25.0777	72.8916
chr4	177702444	177702943	48.4703	-0.0998822	0.218663	-0.456786	0.647825	0.852812	FALSE	FALSE	inactive	'1-2	54	40	61	33	42	54	132	51.3493	41.0314	44.9724	46.139	38.5382	39.8293	73.448
chr4	184365746	184366136	21560.8	-0.0841827	0.0922626	-0.912425	0.361545	0.687647	TRUE	TRUE	not-induced	'1-2	9499	7145	11240	6051	9560	11958	4267	9032.73	7329.23	8286.73	8460.21	8772.04	8819.98	2374.26
chr4	185759812	185760312	1739.25	-0.458369	0.146521	-3.12836	0.00175787	0.0157789	TRUE	TRUE	not-induced	'1-2	4481	2476	4485	1945	3492	3499	2528	4261.04	2539.84	3306.58	2719.4	3204.18	2580.79	1406.64
chr4	185861696	185862196	338.267	-0.197207	0.0940098	-2.09773	0.0359294	0.197219	TRUE	TRUE	not-induced	'1-2	404	319	533	267	440	454	581	384.169	327.225	392.956	373.306	403.734	334.861	323.283
chr4	190364464	190364964	230.875	0.193152	0.152571	1.26598	0.205518	0.539426	TRUE	TRUE	not-induced	'1-2	162	199	221	116	230	312	239	154.048	204.131	162.933	162.186	211.043	230.125	132.985
chr4	190759796	190760296	182.442	-0.0778442	0.148308	-0.524882	0.599665	0.82991	FALSE	FALSE	inactive	'1-2	201	153	281	122	211	309	509	191.134	156.945	207.168	170.574	193.609	227.912	283.22
chr5	4368845	4369345	279.974	-0.289664	0.128839	-2.24827	0.0245589	0.149127	TRUE	FALSE	not-induced	'1-2	311	272	357	156	316	269	500	295.734	279.013	263.199	218.112	289.954	198.409	278.212
chr5	6419361	6419861	305.418	-0.203625	0.254085	-0.801403	0.422898	0.73067	TRUE	FALSE	not-induced	'1-2	374	225	331	172	309	398	517	355.642	230.802	244.031	240.482	283.531	293.557	287.671
chr5	10538998	10539269	465.001	-0.0568016	0.0979553	-0.579872	0.562001	0.81205	FALSE	FALSE	inactive	'1-2	559	487	616	316	585	695	1109	531.561	499.557	454.148	441.816	536.783	512.618	617.075
chr5	11765995	11766495	79.9051	-0.353351	0.215573	-1.63912	0.101187	0.377578	TRUE	TRUE	not-induced	'1-2	118	89	179	63	139	149	170	112.208	91.2948	131.968	88.0835	127.543	109.899	94.5922
chr5	17206073	17206573	73.5145	0.155937	0.20468	0.76186	0.446144	0.744534	FALSE	FALSE	inactive	'1-2	73	73	94	57	93	126	230	69.4167	74.8823	69.3018	79.6946	85.3347	92.935	127.978
chr5	17762943	17763494	733.539	0.0256759	0.108351	0.236969	0.812681	0.925548	FALSE	FALSE	inactive	'1-2	662	592	754	428	728	914	2183	629.505	607.265	555.889	598.409	667.996	674.148	1214.67
chr5	17772292	17772792	937.743	-0.113034	0.0843852	-1.3395	0.180407	0.507205	FALSE	FALSE	inactive	'1-2	1003	900	1274	590	1066	1221	1847	953.766	923.206	939.261	824.909	978.137	900.585	1027.72
chr5	20106126	20106625	190.422	-0.0339174	0.148475	-0.228438	0.819306	0.927916	FALSE	FALSE	inactive	'1-2	213	168	247	142	215	267	601	202.545	172.332	182.102	198.538	197.279	196.934	334.411
chr5	20972577	20973077	3386.18	-0.064481	0.269314	-0.239426	0.810775	0.924946	TRUE	TRUE	not-induced	'1-2	1081	915	1289	643	1057	1330	1334	1027.94	938.593	950.319	899.011	969.879	980.981	742.27
chr5	26367922	26368422	771.122	-0.127824	0.0746894	-1.7114	0.0870067	0.34717	FALSE	FALSE	inactive	'1-2	939	753	1150	566	877	1041	2286	892.908	772.416	847.841	791.354	804.715	767.82	1271.99
chr5	32312865	32313838	4507.56	0.113414	0.372885	0.304152	0.761012	0.903491	TRUE	TRUE	not-induced	'1-2	4495	5107	6526	2811	5391	8148	6570	4274.36	5238.68	4811.31	3930.2	4946.66	6009.8	3655.71
chr5	32785758	32786258	325.807	-0.0627034	0.12818	-0.489181	0.624714	0.84171	FALSE	FALSE	inactive	'1-2	384	360	523	259	364	423	1026	365.151	369.282	385.583	362.121	333.998	311.996	570.891
chr5	38871302	38871802	554.056	-0.127468	0.101711	-1.25324	0.210119	0.543677	FALSE	FALSE	inactive	'1-2	588	476	729	379	521	586	1180	559.137	488.274	537.458	529.899	478.058	432.222	656.581
chr5	39494194	39494694	131.787	0.072688	0.212003	0.342864	0.731701	0.890737	FALSE	FALSE	inactive	'1-2	120	127	108	86	128	107	257	114.11	130.275	79.6234	120.241	117.45	78.921	143.001
chr5	42109166	42109617	183.082	-0.00997243	0.170818	-0.0583805	0.953446	0.984213	FALSE	FALSE	inactive	'1-2	198	187	256	103	158	244	350	188.281	191.822	188.737	144.01	144.977	179.969	194.749
chr5	42158280	42158780	198.064	-0.399039	0.150091	-2.65865	0.0078454	0.0585803	FALSE	FALSE	inactive	'1-2	174	141	231	79	175	163	335	165.459	144.636	170.306	110.454	160.576	120.225	186.402
chr5	42283155	42283655	173.23	-0.325284	0.150222	-2.16535	0.030361	0.174083	TRUE	TRUE	not-induced	'1-2	258	239	419	163	362	318	322	245.336	245.163	308.909	227.899	332.163	234.55	179.169
chr5	42484005	42484505	73.3208	0.110294	0.216605	0.509197	0.610614	0.834563	FALSE	FALSE	inactive	'1-2	97	77	93	65	60	89	273	92.2386	78.9854	68.5646	90.8798	55.0546	65.6446	151.904
chr5	42598370	42599624	189.712	-0.124686	0.120003	-1.03902	0.298795	0.636049	FALSE	FALSE	inactive	'1-2	192	182	274	138	222	224	626	182.575	186.693	202.007	192.945	203.702	165.218	348.322
chr5	42641505	42642005	254.357	-0.0765051	0.121144	-0.63152	0.527701	0.793876	TRUE	TRUE	not-induced	'1-2	354	358	507	219	418	488	411	336.623	367.231	373.787	306.195	383.547	359.939	228.69
chr5	42846930	42847430	83.4336	-0.0969584	0.189957	-0.510424	0.609754	0.834103	FALSE	FALSE	inactive	'1-2	86	49	87	56	73	96	177	81.7786	50.2635	64.141	78.2965	66.9831	70.8076	98.4871
chr5	43232127	43232627	703.796	-0.105909	0.150839	-0.702134	0.482596	0.767128	FALSE	FALSE	inactive	'1-2	623	551	784	399	679	737	1341	592.419	565.207	578.007	557.862	623.035	543.596	746.165
chr5	44587058	44587558	202.371	-0.254336	0.156876	-1.62126	0.104962	0.385386	FALSE	FALSE	inactive	'1-2	281	202	303	119	225	280	477	267.207	207.209	223.388	166.38	206.455	206.522	265.414
chr5	44589855	44590355	79.1989	-0.31257	0.193228	-1.61763	0.105743	0.386903	FALSE	FALSE	inactive	'1-2	131	98	137	61	96	93	197	124.57	100.527	101.004	85.2872	88.0874	68.5949	109.616
chr5	44694277	44694777	222.218	-0.165692	0.139825	-1.185	0.236017	0.571022	TRUE	TRUE	not-induced	'1-2	356	271	385	225	410	403	519	338.525	277.988	283.843	314.584	376.207	297.245	288.784
chr5	44702410	44702910	94.5498	-0.132173	0.162508	-0.813332	0.416028	0.728021	FALSE	FALSE	inactive	'1-2	103	92	126	69	111	107	301	97.9441	94.3722	92.8939	96.4725	101.851	78.921	167.484
chr5	44919218	44919718	221.025	-0.104217	0.131245	-0.794066	0.427157	0.733949	FALSE	FALSE	inactive	'1-2	250	226	348	160	242	289	590	237.728	231.827	256.564	223.704	222.054	213.16	328.29
chr5	45255105	45255605	216.074	-0.123195	0.126443	-0.974306	0.329905	0.662598	FALSE	FALSE	inactive	'1-2	282	196	326	186	258	307	552	268.158	201.054	240.345	260.056	236.735	226.437	307.146
chr5	50329033	50329533	313.102	-0.155071	0.122613	-1.26472	0.205971	0.53976	FALSE	FALSE	inactive	'1-2	335	278	389	188	315	346	557	318.556	285.168	286.792	262.852	289.037	255.203	309.928
chr5	52487605	52488105	90.2628	0.221186	0.196676	1.12462	0.260749	0.598467	FALSE	FALSE	inactive	'1-2	97	117	124	72	89	122	297	92.2386	120.017	91.4194	100.667	81.6644	89.9847	165.258
chr5	55290136	55291269	17398.1	-0.107294	0.144044	-0.744868	0.456351	0.750852	TRUE	TRUE	not-induced	'1-2	17429	13878	23954	11549	20385	25432	9813	16573.5	14235.8	17660.2	16147.3	18704.8	18758.1	5460.19
chr5	55651713	55653170	907.011	0.0780545	0.139752	0.55852	0.576489	0.818754	FALSE	FALSE	inactive	'1-2	638	694	879	470	714	878	1885	606.683	711.895	648.046	657.131	655.15	647.595	1048.86
chr5	56145255	56145755	50.9224	0.224686	0.225292	0.997309	0.318614	0.653546	FALSE	FALSE	inactive	'1-2	60	42	58	44	45	81	128	57.0548	43.083	42.7607	61.5187	41.291	59.7439	71.2223
chr5	56154502	56155002	342.285	-0.18033	0.135504	-1.33082	0.18325	0.511199	FALSE	FALSE	inactive	'1-2	393	277	483	229	421	510	1043	373.709	284.142	356.093	320.177	386.3	376.166	580.351
chr5	56213403	56213903	539.894	-0.16079	0.103541	-1.55291	0.120445	0.415799	FALSE	FALSE	inactive	'1-2	684	539	848	383	575	713	1737	650.425	552.898	625.191	535.492	527.607	525.894	966.509
chr5	56246378	56246878	837.046	-0.150744	0.0787533	-1.91413	0.0556039	0.266359	TRUE	TRUE	not-induced	'1-2	1107	993	1442	667	1155	1235	1371	1052.66	1018.6	1063.12	932.567	1059.8	910.911	762.858
chr5	56328978	56329478	434.497	-0.0970625	0.124083	-0.782237	0.434076	0.736955	TRUE	TRUE	not-induced	'1-2	730	547	956	510	788	963	1086	694.167	561.104	704.814	713.057	723.051	710.289	604.277
chr5	57423725	57424225	83.8852	0.490417	0.226372	2.16642	0.030279	0.173982	FALSE	FALSE	inactive	'1-2	66	68	60	61	49	82	166	62.7603	69.7534	44.2352	85.2872	44.9613	60.4815	92.3665
chr5	57484044	57484470	846.593	-0.358776	0.197117	-1.82012	0.0687408	0.302904	TRUE	TRUE	not-induced	'1-2	964	726	1284	510	1195	1150	464	916.681	744.72	946.633	713.057	1096.5	848.216	258.181
chr5	58836140	58836907	82.4524	-0.173558	0.219664	-0.790106	0.429466	0.735353	TRUE	FALSE	not-induced	'1-2	80	77	95	46	117	107	151	76.0731	78.9854	70.0391	64.315	107.357	78.921	84.0201
chr5	61699444	61700275	6788.59	0.0187981	0.0876372	0.214499	0.830158	0.93291	TRUE	TRUE	not-induced	'1-2	5180	4639	6371	3480	4807	6232	4857	4925.73	4758.62	4697.04	4865.57	4410.79	4596.6	2702.55
chr5	70882972	70883431	3966.18	-0.0660759	0.0917929	-0.719837	0.471626	0.761062	TRUE	TRUE	not-induced	'1-2	3004	2605	3819	1845	3178	3992	2613	2856.54	2672.17	2815.57	2579.59	2916.06	2944.42	1453.94
chr5	72577172	72577596	354.631	-0.144536	0.115465	-1.25177	0.210654	0.543905	TRUE	FALSE	not-induced	'1-2	366	264	440	245	388	432	594	348.034	270.807	324.391	342.547	356.02	318.634	330.516
chr5	73021832	73022332	118.087	0.0318655	0.160999	0.197924	0.843105	0.938659	FALSE	FALSE	inactive	'1-2	117	125	145	83	121	129	294	111.257	128.223	106.902	116.047	111.027	95.1478	163.589
chr5	73509579	73510366	569.346	-0.0459413	0.0868505	-0.52897	0.596826	0.828224	FALSE	FALSE	inactive	'1-2	611	528	819	393	607	804	1882	581.008	541.614	603.81	549.474	556.969	593.014	1047.19
chr5	74342178	74342678	2486.82	-0.0025891	0.216045	-0.0119841	0.990438	0.997587	TRUE	TRUE	not-induced	'1-2	5330	4829	8370	4167	3764	5277	1262	5068.37	4953.51	6170.81	5826.1	3453.76	3892.21	702.208
chr5	75241476	75241976	59.4805	0.0107466	0.223432	0.0480976	0.961638	0.987323	FALSE	FALSE	inactive	'1-2	86	51	79	47	66	110	174	81.7786	52.315	58.243	65.7131	60.5601	81.1337	96.8179
chr5	79250432	79250932	516.308	-0.243231	0.127758	-1.90384	0.0569316	0.270364	TRUE	TRUE	not-induced	'1-2	1027	806	1356	606	998	1047	584	976.588	826.782	999.715	847.28	915.742	772.246	324.952
chr5	81937197	81937544	45.0378	0.29907	0.294032	1.01714	0.309088	0.645571	FALSE	FALSE	inactive	'1-2	29	37	48	24	37	63	121	27.5765	37.954	35.3882	33.5556	33.9504	46.4675	67.3274
chr5	87424631	87425131	80.4106	-0.243914	0.202126	-1.20674	0.227531	0.563296	FALSE	FALSE	inactive	'1-2	72	46	101	61	103	95	189	68.4658	47.1861	74.4626	85.2872	94.5105	70.0701	105.164
chr5	95153033	95153533	740.497	0.102833	0.101147	1.01668	0.309307	0.645571	FALSE	FALSE	inactive	'1-2	530	552	703	432	638	758	1227	503.984	566.233	518.289	604.001	585.414	559.085	682.733
chr5	95428912	95430168	1695.49	-0.148924	0.0845778	-1.76079	0.0782731	0.326679	FALSE	FALSE	inactive	'1-2	1657	1418	2062	933	1623	1861	3360	1575.66	1454.56	1520.22	1304.48	1489.23	1372.64	1869.59
chr5	95478975	95479475	223.633	0.136774	0.156958	0.871404	0.383534	0.705947	FALSE	FALSE	inactive	'1-2	206	225	231	135	197	246	711	195.888	230.802	170.306	188.75	180.763	181.445	395.618
chr5	96223180	96223680	87.7276	-0.147701	0.177824	-0.830605	0.406197	0.721869	FALSE	FALSE	inactive	'1-2	99	68	134	77	105	118	294	94.1404	69.7534	98.7919	107.658	96.3456	87.0344	163.589
chr5	99700706	99701206	87.1453	-0.243341	0.185296	-1.31326	0.189097	0.518843	TRUE	TRUE	not-induced	'1-2	183	137	194	95	136	139	102	174.017	140.533	143.027	132.824	124.791	102.524	56.7553
chr5	102824203	102824703	48.1711	0.0406769	0.231149	0.175977	0.860312	0.947568	FALSE	FALSE	inactive	'1-2	59	64	74	28	65	90	145	56.1039	65.6502	54.5567	39.1482	59.6425	66.3822	80.6815
chr5	105526248	105526612	58.3724	1.2239	0.249342	4.90852	9.17648e-07	1.25805e-05	FALSE	TRUE	NULL	'1-2	29	85	51	59	44	106	103	27.5765	87.1917	37.5999	82.4909	40.3734	78.1834	57.3117
chr5	105937282	105937782	230.896	0.0750267	0.132972	0.564229	0.572598	0.815903	TRUE	TRUE	not-induced	'1-2	205	204	296	150	239	331	371	194.937	209.26	218.227	209.723	219.301	244.139	206.433
chr5	109267954	109268282	480.057	1.19148	0.167935	7.09489	1.29458e-12	2.85667e-11	FALSE	TRUE	induced	'1-2	290	682	392	519	361	845	605	275.765	699.585	289.003	725.641	331.245	623.255	336.637
chr5	111341102	111341602	136.574	-0.146345	0.159609	-0.916895	0.359197	0.686043	FALSE	FALSE	inactive	'1-2	145	129	196	81	139	168	269	137.882	132.326	144.502	113.25	127.543	123.913	149.678
chr5	115489915	115490415	102.452	-0.218531	0.227527	-0.960465	0.336821	0.669569	FALSE	FALSE	inactive	'1-2	117	81	119	64	117	122	251	111.257	83.0886	87.7331	89.4817	107.357	89.9847	139.663
chr5	119866945	119867304	194.839	0.757979	0.256782	2.95184	0.00315886	0.0264298	FALSE	TRUE	not-induced	'1-2	97	158	138	111	118	261	184	92.2386	162.074	101.741	155.195	108.274	192.508	102.382
chr5	123145067	123146290	507.034	-0.0282314	0.0833207	-0.338828	0.73474	0.89193	FALSE	FALSE	inactive	'1-2	448	394	585	302	461	581	1136	426.009	404.159	431.293	422.242	423.003	428.534	632.098
chr5	123620619	123621378	260.372	0.0255043	0.119475	0.213471	0.83096	0.933084	FALSE	FALSE	inactive	'1-2	257	255	414	215	289	370	654	244.385	261.575	305.223	300.603	265.18	272.904	363.902
chr5	123935089	123935583	293.237	0.0057767	0.13154	0.0439159	0.964971	0.98856	FALSE	FALSE	inactive	'1-2	263	229	358	201	285	359	615	250.09	234.905	263.937	281.028	261.51	264.791	342.201
chr5	124395272	124395693	230.949	-0.00812941	0.142703	-0.0569672	0.954571	0.984451	FALSE	FALSE	inactive	'1-2	264	301	404	166	346	427	528	251.041	308.761	297.85	232.093	317.482	314.946	293.792
chr5	124526380	124526880	319.276	-0.207325	0.124829	-1.66087	0.0967388	0.369051	FALSE	FALSE	inactive	'1-2	281	228	332	153	302	315	665	267.207	233.879	244.768	213.917	277.108	232.338	370.022
chr5	124747568	124749026	261.82	-0.00796634	0.145786	-0.0546439	0.956422	0.985141	FALSE	FALSE	inactive	'1-2	206	170	253	159	227	262	413	195.888	174.383	186.525	222.306	208.29	193.246	229.803
chr5	126563519	126564516	372.056	0.155055	0.120031	1.2918	0.196428	0.527049	FALSE	TRUE	not-induced	'1-2	348	444	571	283	397	535	684	330.918	455.448	420.972	395.677	364.278	394.605	380.594
chr5	127176452	127176952	89.7968	0.0170511	0.175466	0.097176	0.922587	0.970433	FALSE	FALSE	inactive	'1-2	104	91	118	70	94	116	248	98.895	93.3464	86.9959	97.8706	86.2523	85.5592	137.993
chr5	127665044	127665544	84.3774	-0.034663	0.192487	-0.18008	0.85709	0.945789	FALSE	FALSE	inactive	'1-2	85	102	130	60	97	99	230	80.8277	104.63	95.8429	83.8891	89.005	73.0204	127.978
chr5	132298053	132298553	465.876	0.0432517	0.113167	0.382193	0.702318	0.877074	FALSE	FALSE	inactive	'1-2	287	265	341	166	315	436	641	272.912	271.833	251.403	232.093	289.037	321.585	356.668
chr5	132376224	132376724	142.441	-0.113448	0.177748	-0.638252	0.52331	0.792505	FALSE	FALSE	inactive	'1-2	141	113	161	83	143	165	371	134.079	115.914	118.698	116.047	131.214	121.701	206.433
chr5	133962003	133962503	187.387	-0.117305	0.117991	-0.994191	0.32013	0.655101	FALSE	FALSE	inactive	'1-2	253	215	312	149	236	278	430	240.581	220.544	230.023	208.325	216.548	205.047	239.263
chr5	138040810	138041310	139.986	0.0508734	0.158677	0.320609	0.748507	0.898434	FALSE	FALSE	inactive	'1-2	124	129	201	112	167	200	273	117.913	132.326	148.188	156.593	153.235	147.516	151.904
chr5	142060432	142060932	6250.56	-0.261208	0.163997	-1.59276	0.111214	0.396473	TRUE	TRUE	not-induced	'1-2	15829	10862	20037	10041	19282	19613	1026	15052	11142.1	14772.3	14038.8	17692.7	14466.1	570.891
chr5	142405630	142406130	775.666	-0.134994	0.140721	-0.9593	0.337407	0.670042	FALSE	FALSE	inactive	'1-2	826	633	1046	504	761	949	3840	785.455	649.322	771.167	704.668	698.276	699.963	2136.67
chr5	145316048	145316345	412.194	-0.124433	0.132767	-0.937227	0.348642	0.677967	FALSE	FALSE	inactive	'1-2	458	316	597	290	380	536	825	435.518	324.148	440.14	405.464	348.679	395.343	459.05
chr5	149055257	149055717	1416.8	-0.0251332	0.122597	-0.205007	0.837567	0.936166	FALSE	FALSE	inactive	'1-2	1319	1205	1774	837	1327	1770	4048	1254.25	1236.07	1307.89	1170.25	1217.63	1305.52	2252.41
chr5	149318965	149319786	338.739	0.0259141	0.101488	0.255342	0.798459	0.919865	FALSE	FALSE	inactive	'1-2	308	297	447	239	312	399	925	292.881	304.658	329.552	334.158	286.284	294.294	514.693
chr5	149872153	149872653	1197.39	-0.0251331	0.105492	-0.238248	0.811689	0.925103	TRUE	TRUE	not-induced	'1-2	1622	1518	2411	1236	1527	1853	1912	1542.38	1557.14	1777.52	1728.12	1401.14	1366.73	1063.88
chr5	149920478	149920978	389.107	0.0136927	0.102364	0.133766	0.893588	0.961336	FALSE	FALSE	inactive	'1-2	374	364	466	273	388	430	1124	355.642	373.386	343.56	381.695	356.02	317.159	625.421
chr5	150563478	150563978	176.785	0.0469436	0.170664	0.275065	0.783267	0.913609	FALSE	FALSE	inactive	'1-2	151	158	197	78	115	182	407	143.588	162.074	145.239	109.056	105.521	134.239	226.465
chr5	151516452	151516952	129.677	-0.415595	0.175733	-2.36492	0.0180339	0.116156	FALSE	FALSE	inactive	'1-2	174	85	199	102	158	157	330	165.459	87.1917	146.713	142.611	144.977	115.8	183.62
chr5	154134404	154136208	11252.4	0.628647	0.133879	4.69565	2.65766e-06	3.50247e-05	TRUE	TRUE	not-induced	'1-2	5099	8762	8221	5728	7018	13319	6894	4848.71	8987.93	6060.96	8008.61	6439.56	9823.82	3835.99
chr5	154795959	154796872	80.973	-0.272905	0.201162	-1.35664	0.174896	0.498073	FALSE	FALSE	inactive	'1-2	111	65	122	62	112	125	212	105.551	66.676	89.9449	86.6854	102.769	92.1974	117.962
chr5	157315807	157316636	355.048	-0.00399806	0.110862	-0.0360634	0.971232	0.990767	FALSE	FALSE	inactive	'1-2	347	315	465	276	390	441	1217	329.967	323.122	342.823	385.89	357.855	325.273	677.169
chr5	159622918	159623418	514.24	-0.1235	0.0934758	-1.3212	0.186435	0.515934	FALSE	FALSE	inactive	'1-2	634	522	792	422	721	775	1131	602.879	535.46	583.905	590.02	661.573	571.624	629.316
chr5	167710093	167710501	40.4105	-0.598283	0.273998	-2.18353	0.0289971	0.168617	FALSE	FALSE	inactive	'1-2	36	25	57	16	57	47	97	34.2329	25.6446	42.0234	22.3704	52.3019	34.6662	53.9732
chr5	167722442	167722752	91.5258	-0.306477	0.21309	-1.43825	0.150363	0.462749	FALSE	FALSE	inactive	'1-2	64	56	114	52	97	83	311	60.8585	57.4439	84.0469	72.7039	89.005	61.2191	173.048
chr5	168173430	168173930	60.9818	0.356226	0.256366	1.38952	0.164674	0.481528	FALSE	FALSE	inactive	'1-2	31	44	46	37	45	53	675	29.4783	45.1345	33.9137	51.7316	41.291	39.0917	375.587
chr5	169538309	169538809	691.68	-0.0445333	0.180693	-0.246458	0.805327	0.922444	FALSE	FALSE	inactive	'1-2	388	399	611	307	503	549	873	368.954	409.288	450.462	429.233	461.541	404.931	485.759
chr5	169571353	169571853	1425.13	-0.167963	0.0855281	-1.96383	0.0495498	0.246268	TRUE	TRUE	not-induced	'1-2	1382	1164	1764	844	1438	1532	2063	1314.16	1194.01	1300.51	1180.04	1319.48	1129.97	1147.9
chr5	171433834	171434219	7339.92	-0.0768139	0.104455	-0.73538	0.462108	0.754597	TRUE	TRUE	not-induced	'1-2	4683	3511	5432	2921	4391	5630	4383	4453.13	3601.53	4004.76	4084	4029.08	4152.57	2438.81
chr5	172259653	172260153	401.738	-0.181222	0.0968036	-1.87206	0.061198	0.283093	FALSE	FALSE	inactive	'1-2	453	406	614	273	494	517	1347	430.764	416.469	452.674	381.695	453.283	381.329	749.504
chr5	172294253	172294753	1352.47	-0.246271	0.102049	-2.41327	0.01581	0.105315	TRUE	FALSE	not-induced	'1-2	1733	1298	2179	955	1449	1631	2706	1647.93	1331.47	1606.47	1335.23	1329.57	1202.99	1505.68
chr5	176262007	176262507	1532.42	-0.0929941	0.128341	-0.724585	0.468707	0.759265	TRUE	TRUE	not-induced	'1-2	1429	1121	1822	897	1237	1621	2118	1358.86	1149.9	1343.28	1254.14	1135.04	1195.62	1178.51
chr5	177507740	177509157	1362.94	-0.0422622	0.0847735	-0.498531	0.61811	0.838517	FALSE	FALSE	inactive	'1-2	1680	1452	1940	1076	1559	1818	3423	1597.53	1489.44	1430.27	1504.41	1430.5	1340.92	1904.64
chr6	1271350	1272143	680.219	-0.126084	0.0885422	-1.424	0.154446	0.468352	FALSE	FALSE	inactive	'1-2	823	654	1085	522	773	953	1537	782.602	670.863	799.92	729.835	709.287	702.913	855.224
chr6	1335365	1336228	2596.93	-0.0447536	0.181627	-0.246403	0.80537	0.922444	TRUE	TRUE	not-induced	'1-2	495	494	633	313	532	593	826	470.702	506.738	466.681	437.621	488.151	437.385	459.607
chr6	1761712	1762935	657.365	0.0348758	0.0941962	0.370246	0.711199	0.88184	FALSE	FALSE	inactive	'1-2	607	635	812	457	647	721	1198	577.205	651.373	598.65	638.955	593.673	531.795	666.597
chr6	1767809	1768156	160.445	-0.151549	0.210318	-0.720572	0.471173	0.760589	TRUE	TRUE	not-induced	'1-2	240	150	233	109	229	322	327	228.219	153.868	171.78	152.399	210.125	237.501	181.951
chr6	3295595	3296095	7757.35	-0.101546	0.130074	-0.780679	0.434991	0.737572	TRUE	FALSE	not-induced	'1-2	10548	8314	12254	6259	9085	11199	16384	10030.2	8528.37	9034.3	8751.03	8336.19	8260.15	9116.46
chr6	5359561	5360061	278.226	-0.100316	0.117203	-0.855915	0.392045	0.71222	FALSE	FALSE	inactive	'1-2	284	237	343	153	270	347	788	270.059	243.111	252.878	213.917	247.746	255.94	438.462
chr6	6050670	6051170	507.56	-0.113856	0.127867	-0.890429	0.373236	0.699188	TRUE	TRUE	not-induced	'1-2	566	501	666	315	609	689	824	538.217	513.918	491.011	440.418	558.805	508.192	458.494
chr6	6702098	6702598	254.064	-0.140993	0.12512	-1.12687	0.259799	0.597437	TRUE	FALSE	not-induced	'1-2	357	245	425	237	378	439	565	339.476	251.317	313.333	331.362	346.844	323.797	314.38
chr6	6821007	6821366	1045.44	-0.0431414	0.0896419	-0.481263	0.630329	0.844005	TRUE	TRUE	not-induced	'1-2	975	847	1262	647	997	1243	1485	927.141	868.84	930.414	904.604	914.825	916.811	826.29
chr6	6931667	6932115	197.824	0.599559	0.168635	3.55536	0.000377462	0.00386075	FALSE	TRUE	not-induced	'1-2	95	127	122	108	93	169	174	90.3368	130.275	89.9449	151	85.3347	124.651	96.8179
chr6	7204012	7204701	6105.22	-0.140435	0.0964536	-1.45598	0.145397	0.455743	FALSE	FALSE	inactive	'1-2	1506	1229	1719	795	1434	1712	2890	1432.08	1260.69	1267.34	1111.53	1315.81	1262.74	1608.07
chr6	7267911	7268411	1021.04	-0.128777	0.121287	-1.06175	0.288348	0.625658	FALSE	FALSE	inactive	'1-2	1308	1121	1599	821	1451	1539	3829	1243.79	1149.9	1178.87	1147.88	1331.4	1135.13	2130.55
chr6	10591525	10592444	860.946	0.045526	0.107383	0.423958	0.671596	0.864231	FALSE	FALSE	inactive	'1-2	843	873	1192	588	818	1077	1612	801.62	895.51	878.806	822.113	750.578	794.373	896.956
chr6	13467411	13467911	213.042	-0.12524	0.116822	-1.07206	0.283692	0.62226	FALSE	FALSE	inactive	'1-2	234	220	306	142	235	253	852	222.514	225.673	225.6	198.538	215.631	186.608	474.074
chr6	13558933	13559433	608.197	-0.136884	0.0998345	-1.37111	0.17034	0.490276	FALSE	FALSE	inactive	'1-2	521	455	751	355	559	627	1259	495.426	466.732	553.677	496.344	512.926	462.462	700.538
chr6	14367105	14367456	62.3887	0.207001	0.235231	0.879993	0.378863	0.702733	FALSE	FALSE	inactive	'1-2	45	38	59	51	40	51	195	42.7911	38.9798	43.4979	71.3057	36.7031	37.6166	108.503
chr6	14458835	14459335	133.227	-0.0368021	0.227386	-0.161848	0.871425	0.951906	FALSE	FALSE	inactive	'1-2	88	96	109	54	102	104	295	83.6804	98.4753	80.3606	75.5002	93.5929	76.7083	164.145
chr6	15953032	15953528	118.213	-0.0143339	0.165709	-0.0865004	0.931069	0.974413	FALSE	FALSE	inactive	'1-2	148	125	144	78	149	186	289	140.735	128.223	106.164	109.056	136.719	137.19	160.807
chr6	16406730	16407353	53.8118	-0.629788	0.234523	-2.6854	0.00724422	0.0549815	TRUE	FALSE	not-induced	'1-2	51	35	105	37	88	64	107	48.4966	35.9025	77.4116	51.7316	80.7468	47.2051	59.5374
chr6	16454451	16455296	717.782	0.02409	0.0745278	0.323235	0.746517	0.897314	FALSE	FALSE	inactive	'1-2	817	731	939	513	768	1001	1811	776.896	749.849	692.281	717.252	704.699	738.317	1007.68
chr6	16673261	16673761	194.877	-0.0776711	0.130782	-0.593896	0.552582	0.807791	FALSE	FALSE	inactive	'1-2	187	200	285	142	230	229	463	177.821	205.157	210.117	198.538	211.043	168.906	257.625
chr6	16760084	16760552	3293.22	0.231868	0.365297	0.634739	0.525599	0.793193	FALSE	TRUE	not-induced	'1-2	2701	3856	5606	2187	3470	6230	5937	2568.42	3955.43	4133.04	3057.76	3183.99	4595.12	3303.49
chr6	17159485	17159949	141.03	-0.219723	0.138684	-1.58435	0.113115	0.401248	FALSE	FALSE	inactive	'1-2	169	139	226	96	172	189	442	160.704	142.584	166.619	134.223	157.823	139.403	245.94
chr6	17725333	17725833	490.413	-0.0898852	0.150729	-0.596337	0.55095	0.807151	FALSE	FALSE	inactive	'1-2	329	334	515	211	392	473	771	312.851	342.612	379.685	295.01	359.69	348.875	429.003
chr6	17866032	17866421	412.477	-0.0846992	0.13057	-0.648687	0.516541	0.788503	TRUE	TRUE	not-induced	'1-2	444	367	523	291	588	652	479	422.206	376.463	385.583	406.862	539.535	480.902	266.527
chr6	20691336	20691836	519.289	-0.153211	0.10722	-1.42895	0.153019	0.46613	FALSE	FALSE	inactive	'1-2	476	367	635	313	478	558	1107	452.635	376.463	468.156	437.621	438.602	411.569	615.962
chr6	21808245	21809373	829.689	-0.0615092	0.093946	-0.654729	0.512642	0.786154	TRUE	FALSE	not-induced	'1-2	732	731	1109	525	823	943	1309	696.069	749.849	817.614	734.03	755.166	695.537	728.36
chr6	22149770	22150481	496.874	-0.164101	0.143379	-1.14453	0.252405	0.589441	FALSE	FALSE	inactive	'1-2	441	344	565	259	450	539	982	419.353	352.87	416.548	362.121	412.91	397.555	546.409
chr6	22362478	22363071	26.7881	-0.240112	0.293662	-0.817648	0.413558	0.727023	FALSE	FALSE	inactive	'1-2	34	25	31	13	24	28	84	32.3311	25.6446	22.8549	18.176	22.0219	20.6522	46.7397
chr6	25173028	25173528	285.161	0.154048	0.148337	1.0385	0.299036	0.636201	FALSE	FALSE	inactive	'1-2	269	264	381	220	249	375	705	255.796	270.807	280.893	307.593	228.477	276.592	392.279
chr6	32489508	32490008	229.966	-0.0361546	0.132567	-0.272728	0.785062	0.915031	FALSE	FALSE	inactive	'1-2	248	215	324	162	257	331	588	235.827	220.544	238.87	226.501	235.817	244.139	327.178
chr6	34164086	34164586	2651.58	-0.109085	0.0803289	-1.35799	0.174468	0.497551	TRUE	TRUE	not-induced	'1-2	3499	2907	4190	1994	3111	3829	4071	3327.25	2981.96	3089.09	2787.91	2854.58	2824.19	2265.2
chr6	34760261	34760761	15971.2	-0.127883	0.17361	-0.736611	0.461359	0.754597	TRUE	TRUE	not-induced	'1-2	11103	7845	12907	6819	10056	12520	15006	10558	8047.28	9515.73	9533.99	9227.16	9234.5	8349.71
chr6	35467571	35468071	2163.76	-0.0454751	0.0890684	-0.510563	0.609657	0.834103	FALSE	FALSE	inactive	'1-2	2573	2317	3005	1529	2355	2842	4857	2446.7	2376.74	2215.45	2137.77	2160.89	2096.2	2702.55
chr6	37027415	37027826	1204.16	-0.0158416	0.115424	-0.137246	0.890836	0.95977	TRUE	TRUE	not-induced	'1-2	806	850	1110	536	883	1014	1318	766.436	871.917	818.351	749.409	810.221	747.906	733.367
chr6	37275446	37275946	266.523	-0.205002	0.137468	-1.49127	0.135889	0.440808	FALSE	FALSE	inactive	'1-2	308	200	325	182	292	319	497	292.881	205.157	239.607	254.464	267.933	235.288	276.543
chr6	37775671	37776171	634.054	-0.106457	0.121118	-0.878947	0.37943	0.703234	FALSE	FALSE	inactive	'1-2	748	643	984	468	669	806	1514	711.283	659.58	725.457	654.335	613.859	594.489	842.427
chr6	40744204	40744704	187.552	0.118625	0.181124	0.654936	0.512509	0.786137	FALSE	FALSE	inactive	'1-2	161	164	176	87	124	188	855	153.097	168.229	129.757	121.639	113.78	138.665	475.743
chr6	43394963	43395622	4767.61	-0.0398797	0.116584	-0.342068	0.7323	0.89086	TRUE	TRUE	not-induced	'1-2	3772	3416	4788	2477	4309	5149	4930	3586.85	3504.08	3529.97	3463.22	3953.84	3797.8	2743.17
chr6	45753944	45754396	177.187	-0.146592	0.154962	-0.945988	0.344155	0.675125	FALSE	FALSE	inactive	'1-2	163	161	247	91	211	246	522	154.999	165.151	182.102	127.232	193.609	181.445	290.454
chr6	47314557	47314996	921.955	0.426293	0.12527	3.403	0.000666499	0.00653206	FALSE	TRUE	not-induced	'1-2	380	480	439	358	453	657	731	361.347	492.377	323.654	500.538	415.663	484.59	406.746
chr6	49419021	49419521	32.1269	0.0924394	0.310013	0.298179	0.765566	0.905556	FALSE	FALSE	inactive	'1-2	32	29	56	20	30	63	68	30.4292	29.7478	41.2862	27.963	27.5273	46.4675	37.8369
chr6	50797671	50798171	207.206	-0.122747	0.15204	-0.807333	0.419474	0.72978	FALSE	FALSE	inactive	'1-2	234	225	319	177	313	283	501	222.514	230.802	235.184	247.473	287.202	208.735	278.769
chr6	51153811	51154311	101.697	-0.361025	0.164158	-2.19925	0.0278602	0.163402	FALSE	FALSE	inactive	'1-2	111	99	159	54	124	114	275	105.551	101.553	117.223	75.5002	113.78	84.0841	153.017
chr6	66343548	66344048	67.6222	-0.389769	0.252812	-1.54173	0.123139	0.420557	FALSE	FALSE	inactive	'1-2	71	56	100	35	67	66	171	67.5149	57.4439	73.7253	48.9353	61.4777	48.6802	95.1486
chr6	70081358	70081858	22.6709	0.0603752	0.413572	0.145985	0.883933	0.956055	FALSE	FALSE	inactive	'1-2	26	28	26	6	22	37	43	24.7238	28.722	19.1686	8.38891	20.1867	27.2904	23.9263
chr6	74484045	74484545	292.45	-0.00465085	0.103929	-0.0447503	0.964306	0.988502	FALSE	FALSE	inactive	'1-2	298	277	383	209	327	389	630	283.372	284.142	282.368	292.214	300.048	286.918	350.547
chr6	75168663	75169163	250.906	-0.127997	0.127006	-1.00781	0.313547	0.649392	FALSE	FALSE	inactive	'1-2	305	238	301	152	276	323	848	290.029	244.137	221.913	212.519	253.251	238.238	471.848
chr6	81237250	81238188	274.033	-0.0558353	0.123096	-0.453592	0.650123	0.853793	TRUE	TRUE	not-induced	'1-2	393	345	505	285	444	488	531	373.709	353.896	372.313	398.473	407.404	359.939	295.461
chr6	87212023	87212523	277.041	-0.117177	0.159811	-0.733221	0.463424	0.755673	FALSE	FALSE	inactive	'1-2	384	314	474	220	328	416	631	365.151	322.096	349.458	307.593	300.965	306.833	351.104
chr6	88748036	88748536	73.1687	0.239738	0.2307	1.03918	0.298722	0.636049	FALSE	FALSE	inactive	'1-2	108	111	80	48	76	120	211	102.699	113.862	58.9803	67.1113	69.7359	88.5095	117.406
chr6	90928233	90928670	384.856	-0.200144	0.247981	-0.807097	0.419611	0.72983	TRUE	TRUE	not-induced	'1-2	363	248	341	213	526	521	359	345.182	254.395	251.403	297.806	482.646	384.279	199.756
chr6	91638164	91638664	67.7884	0.0393281	0.201449	0.195226	0.845216	0.939206	FALSE	FALSE	inactive	'1-2	59	57	95	47	57	83	175	56.1039	58.4697	70.0391	65.7131	52.3019	61.2191	97.3743
chr6	99425351	99425816	62.0198	0.0377901	0.19547	0.193329	0.846701	0.939688	FALSE	FALSE	inactive	'1-2	66	67	100	40	64	100	163	62.7603	68.7276	73.7253	55.9261	58.725	73.758	90.6972
chr6	106709628	106710128	299.535	0.0386303	0.118696	0.325456	0.744836	0.896574	FALSE	FALSE	inactive	'1-2	307	339	440	228	380	440	900	291.93	347.741	324.391	318.779	348.679	324.535	500.782
chr6	108881597	108882438	4207.01	-0.0233132	0.156987	-0.148504	0.881945	0.955192	TRUE	TRUE	not-induced	'1-2	4335	4276	6463	2836	4834	6447	4594	4122.21	4386.26	4764.87	3965.16	4435.57	4755.18	2556.21
chr6	109266869	109269104	2443.15	-0.121618	0.0673271	-1.80638	0.0708587	0.307873	TRUE	TRUE	not-induced	'1-2	3464	2914	4919	2292	3564	4309	4852	3293.96	2989.14	3626.55	3204.56	3270.25	3178.23	2699.77
chr6	110947040	110947540	141.672	-0.342458	0.186619	-1.83506	0.0664965	0.296579	FALSE	FALSE	inactive	'1-2	115	110	194	75	187	157	337	109.355	112.836	143.027	104.861	171.587	115.8	187.515
chr6	112031171	112031671	127.246	-0.145118	0.179507	-0.808424	0.418846	0.729398	FALSE	FALSE	inactive	'1-2	91	85	118	66	99	87	222	86.5331	87.1917	86.9959	92.278	90.8402	64.1694	123.526
chr6	113726606	113727106	135.739	-0.185988	0.169118	-1.09975	0.271442	0.608398	FALSE	FALSE	inactive	'1-2	197	182	189	106	208	164	349	187.33	186.693	139.341	148.204	190.856	120.963	194.192
chr6	113811473	113811973	109.094	-0.0624382	0.154603	-0.40386	0.686315	0.871219	FALSE	FALSE	inactive	'1-2	135	134	164	82	127	136	247	128.373	137.455	120.91	114.648	116.532	100.311	137.437
chr6	113917074	113917713	308.731	-0.0289219	0.282955	-0.102214	0.918587	0.968661	FALSE	FALSE	inactive	'1-2	195	172	212	123	198	223	478	185.428	176.435	156.298	171.973	181.68	164.48	265.971
chr6	114291186	114291686	2727.96	-0.191811	0.121863	-1.57399	0.11549	0.405747	TRUE	TRUE	not-induced	'1-2	2414	1768	2809	1319	2109	2520	3222	2295.51	1813.59	2070.94	1844.16	1935.17	1858.7	1792.8
chr6	117847548	117848048	42.2493	-0.0388218	0.281956	-0.137688	0.890487	0.959539	FALSE	FALSE	inactive	'1-2	43	43	59	23	36	51	193	40.8893	44.1087	43.4979	32.1575	33.0328	37.6166	107.39
chr6	119468161	119468661	958.148	-0.277797	0.174167	-1.595	0.110711	0.39537	TRUE	TRUE	not-induced	'1-2	1944	1365	2637	1204	2662	2788	635	1848.58	1400.2	1944.14	1683.37	2442.59	2056.37	353.33
chr6	120819081	120819511	100.974	0.226082	0.195704	1.15522	0.247998	0.584386	FALSE	FALSE	inactive	'1-2	73	102	120	58	72	106	267	69.4167	104.63	88.4704	81.0928	66.0656	78.1834	148.565
chr6	125906573	125907073	422.569	0.781691	0.100975	7.74142	9.83109e-15	2.53745e-13	FALSE	TRUE	not-induced	'1-2	382	639	502	485	389	747	946	363.249	655.476	370.101	678.103	356.938	550.972	526.378
chr6	126142848	126143348	349.029	0.0576551	0.0966378	0.59661	0.550768	0.807151	FALSE	FALSE	inactive	'1-2	292	314	400	228	344	391	756	277.667	322.096	294.901	318.779	315.647	288.394	420.657
chr6	131689497	131690218	139.636	-0.0345432	0.144793	-0.23857	0.811439	0.924971	FALSE	FALSE	inactive	'1-2	168	154	229	110	140	187	287	159.753	157.971	168.831	153.797	128.461	137.927	159.694
chr6	134427018	134427495	276.171	0.0576221	0.139088	0.414286	0.678665	0.868009	FALSE	FALSE	inactive	'1-2	242	271	393	181	252	343	638	230.121	277.988	289.741	253.065	231.229	252.99	354.999
chr6	134793779	134794279	82.6385	-0.0699131	0.201803	-0.346442	0.729011	0.88981	FALSE	FALSE	inactive	'1-2	77	81	106	57	102	97	159	73.2203	83.0886	78.1488	79.6946	93.5929	71.5452	88.4715
chr6	135572546	135573394	236.244	-0.241801	0.146318	-1.65257	0.0984193	0.372335	FALSE	FALSE	inactive	'1-2	272	189	293	166	255	241	698	258.648	193.873	216.015	232.093	233.982	177.757	388.384
chr6	138578881	138580621	758.109	-0.109856	0.0788625	-1.39301	0.163617	0.48002	FALSE	FALSE	inactive	'1-2	888	781	1229	611	996	1109	1955	844.411	801.138	906.084	854.271	913.907	817.976	1087.81
chr6	139094415	139094984	1713.28	-0.0796962	0.130375	-0.611286	0.54101	0.800984	TRUE	TRUE	not-induced	'1-2	1660	1441	2233	1108	2048	2438	2179	1578.52	1478.16	1646.29	1549.15	1879.2	1798.22	1212.45
chr6	140858873	140859360	3514.57	-0.303929	0.168116	-1.80785	0.07063	0.307428	TRUE	TRUE	not-induced	'1-2	2938	2118	3905	1688	2726	2835	383	2793.78	2172.61	2878.97	2360.08	2501.32	2091.04	213.111
chr6	141640070	141640570	25.0238	-0.325434	0.272176	-1.19567	0.231824	0.568098	FALSE	FALSE	inactive	'1-2	42	23	46	20	37	45	72	39.9384	23.593	33.9137	27.963	33.9504	33.1911	40.0626
chr6	147523490	147523971	460.234	-0.113537	0.107601	-1.05516	0.291352	0.628371	FALSE	FALSE	inactive	'1-2	473	392	632	285	460	588	830	449.782	402.108	465.944	398.473	422.086	433.697	461.832
chr6	150306720	150307220	684.499	-0.0451753	0.0977729	-0.462043	0.64405	0.850427	TRUE	TRUE	not-induced	'1-2	795	744	1045	546	864	981	1341	755.976	763.184	770.43	763.391	792.787	723.565	746.165
chr6	151997284	151997719	390.502	-0.0733617	0.133833	-0.548157	0.583584	0.821805	FALSE	FALSE	inactive	'1-2	461	441	466	257	460	450	1140	438.371	452.371	343.56	359.325	422.086	331.911	634.324
chr6	152022998	152024748	239.806	-0.122686	0.131569	-0.932483	0.351087	0.680356	TRUE	FALSE	not-induced	'1-2	287	227	366	210	277	290	472	272.912	232.853	269.835	293.612	254.169	213.898	262.632
chr6	154619453	154620072	234.873	-0.193673	0.17022	-1.13778	0.255212	0.591712	TRUE	TRUE	not-induced	'1-2	373	280	386	214	444	442	384	354.691	287.22	284.58	299.204	407.404	326.01	213.667
chr6	155905023	155905523	298.964	-0.0269198	0.138913	-0.193789	0.846341	0.939536	FALSE	FALSE	inactive	'1-2	340	338	385	173	320	394	800	323.311	346.715	283.843	241.88	293.625	290.606	445.14
chr6	156878621	156879121	617.126	0.00876923	0.0990339	0.0885477	0.929441	0.973704	FALSE	FALSE	inactive	'1-2	653	666	865	390	681	893	1346	620.947	683.173	637.724	545.279	624.87	658.658	748.947
chr6	159128119	159128481	91.2427	0.415036	0.22349	1.85707	0.0633009	0.28866	FALSE	TRUE	not-induced	'1-2	40	63	72	46	41	64	97	38.0365	64.6244	53.0822	64.315	37.6207	47.2051	53.9732
chr6	160659814	160660207	49.608	1.2235	0.277581	4.40772	1.04466e-05	0.000130345	TRUE	TRUE	NULL	'1-2	22	58	24	41	35	65	22	20.9201	59.4955	17.6941	57.3242	32.1152	47.9427	12.2413
chr6	164377560	164378060	87.1627	-0.211691	0.204361	-1.03587	0.300264	0.637582	FALSE	FALSE	inactive	'1-2	101	101	155	65	124	117	195	96.0423	103.604	114.274	90.8798	113.78	86.2968	108.503
chr6	165086306	165086806	655.088	0.0157015	0.210903	0.0744489	0.940653	0.978807	TRUE	TRUE	not-induced	'1-2	1127	1058	1784	1084	2087	2368	502	1071.68	1085.28	1315.26	1515.6	1914.98	1746.59	279.325
chr6	167104555	167105934	3386.95	-0.0716788	0.108593	-0.660071	0.509208	0.785412	FALSE	FALSE	inactive	'1-2	3823	3030	4582	2366	3710	4737	7169	3635.34	3108.13	3378.09	3308.03	3404.21	3493.91	3989.01
chr6	167443611	167445108	1665.73	-0.0558558	0.0822211	-0.679338	0.496924	0.776534	FALSE	FALSE	inactive	'1-2	1985	1696	2508	1208	1828	2409	3387	1887.56	1739.73	1849.03	1688.97	1677.33	1776.83	1884.61
chr6	168083747	168083999	804.988	-0.0410183	0.208601	-0.196635	0.844113	0.938808	TRUE	TRUE	not-induced	'1-2	469	393	595	333	537	637	618	445.978	403.133	438.666	465.584	492.739	469.838	343.87
chr6	168508085	168508510	742.411	0.49854	0.148641	3.354	0.000796532	0.00765431	TRUE	TRUE	not-induced	'1-2	801	1041	942	778	904	1454	808	761.682	1067.84	694.493	1087.76	829.49	1072.44	449.591
chr6	168662415	168663362	327.734	0.00887497	0.124287	0.0714069	0.943074	0.97966	TRUE	TRUE	not-induced	'1-2	270	322	382	176	319	351	478	256.747	330.303	281.631	246.075	292.707	258.89	265.971
chr7	2377936	2378436	216.711	0.151043	0.165498	0.912659	0.361422	0.687596	FALSE	FALSE	inactive	'1-2	220	181	340	181	188	359	446	209.201	185.667	250.666	253.065	172.505	264.791	248.165
chr7	2480487	2480987	703.896	-0.062586	0.107417	-0.582646	0.560132	0.811153	TRUE	TRUE	not-induced	'1-2	601	503	730	361	612	778	865	571.499	515.97	538.195	504.733	561.557	573.837	481.307
chr7	2741430	2741930	4888.19	-0.195828	0.112668	-1.7381	0.0821932	0.335699	FALSE	FALSE	inactive	'1-2	6804	5089	7830	3625	5536	6557	10398	6470.02	5220.22	5772.69	5068.3	5079.71	4836.31	5785.7
chr7	3411299	3411799	389.21	-0.0851056	0.0958918	-0.887517	0.374801	0.699919	FALSE	FALSE	inactive	'1-2	506	424	643	325	474	576	978	481.162	434.933	474.054	454.399	434.932	424.846	544.183
chr7	5456970	5458566	3028.38	-0.0899603	0.0593984	-1.51452	0.129893	0.43188	TRUE	TRUE	not-induced	'1-2	3280	2842	4139	2075	3301	3836	4180	3119	2915.28	3051.49	2901.16	3028.92	2829.35	2325.85
chr7	5563666	5564166	402.46	-0.0737456	0.0907784	-0.81237	0.416579	0.728021	FALSE	FALSE	inactive	'1-2	515	437	590	331	495	548	920	489.72	448.268	434.979	462.788	454.201	404.194	511.911
chr7	5567800	5568300	2073.92	-0.122568	0.0823289	-1.48876	0.136551	0.441237	FALSE	FALSE	inactive	'1-2	2527	2059	3029	1503	2318	2713	4925	2402.96	2112.09	2233.14	2101.42	2126.94	2001.05	2740.39
chr7	5573600	5574100	262.824	-0.0487381	0.118506	-0.411272	0.680873	0.868774	TRUE	TRUE	not-induced	'1-2	268	281	338	171	327	336	378	254.845	288.246	249.192	239.084	300.048	247.827	210.328
chr7	7364359	7364859	131.418	0.165417	0.202089	0.818537	0.413051	0.727013	FALSE	FALSE	inactive	'1-2	113	155	227	124	162	198	395	107.453	158.997	167.356	173.371	148.648	146.041	219.788
chr7	13590450	13590950	458.656	-0.0533608	0.0963325	-0.553923	0.579631	0.820022	FALSE	FALSE	inactive	'1-2	480	432	573	312	481	537	1297	456.439	443.139	422.446	436.223	441.355	396.08	721.683
chr7	15056350	15056850	289.983	0.203235	0.232567	0.873877	0.382185	0.705144	TRUE	TRUE	not-induced	'1-2	107	141	187	117	157	184	197	101.748	144.636	137.866	163.584	144.06	135.715	109.616
chr7	16137646	16138129	9.86389	-0.815237	0.455121	-1.79125	0.0732527	0.312762	TRUE	TRUE	not-induced	'1-2	31	12	28	9	14	15	10	29.4783	12.3094	20.6431	12.5834	12.8461	11.0637	5.56424
chr7	16687200	16687700	186.766	-0.33157	0.139107	-2.38356	0.017146	0.112309	FALSE	FALSE	inactive	'1-2	208	171	278	130	252	204	515	197.79	175.409	204.956	181.76	231.229	150.466	286.559
chr7	16966501	16966832	476.388	-0.283654	0.16844	-1.68401	0.0921802	0.359641	TRUE	TRUE	not-induced	'1-2	1408	981	1431	703	1280	1277	160	1338.89	1006.29	1055.01	982.9	1174.5	941.889	89.0279
chr7	17535656	17536156	98.2465	-0.132035	0.243834	-0.541494	0.588167	0.823456	FALSE	FALSE	inactive	'1-2	110	92	140	78	130	130	245	104.6	94.3722	103.215	109.056	119.285	95.8853	136.324
chr7	20380319	20381014	813.865	-0.0734831	0.182479	-0.402693	0.687174	0.871437	FALSE	FALSE	inactive	'1-2	280	271	408	216	309	315	570	266.256	277.988	300.799	302.001	283.531	232.338	317.162
chr7	24990859	24991359	24.1205	0.902818	0.326976	2.76111	0.00576044	0.0450348	FALSE	FALSE	inactive	'1-2	19	36	18	16	13	29	96	18.0674	36.9282	13.2706	22.3704	11.9285	21.3898	53.4167
chr7	26331586	26332086	430.511	0.119694	0.16672	0.717932	0.472799	0.761073	FALSE	TRUE	not-induced	'1-2	379	525	634	264	469	620	790	360.396	538.537	467.419	369.112	430.344	457.299	439.575
chr7	26620278	26620778	162.548	0.0876897	0.121309	0.722865	0.469763	0.759686	TRUE	TRUE	not-induced	'1-2	192	184	243	131	177	251	288	182.575	188.744	179.153	183.158	162.411	185.132	160.25
chr7	27718500	27719000	154.201	-0.0929826	0.172388	-0.539379	0.589625	0.824166	FALSE	FALSE	inactive	'1-2	148	136	172	88	143	152	374	140.735	139.507	126.808	123.037	131.214	112.112	208.103
chr7	29344362	29344862	389.07	0.251673	0.118392	2.12575	0.033524	0.188399	TRUE	TRUE	not-induced	'1-2	409	429	531	299	353	617	611	388.924	440.062	391.481	418.047	323.905	455.087	339.975
chr7	30183425	30183925	181.268	-0.101549	0.186017	-0.54591	0.585128	0.82239	FALSE	FALSE	inactive	'1-2	188	135	246	117	230	306	486	178.772	138.481	181.364	163.584	211.043	225.699	270.422
chr7	30223250	30223750	158.093	-0.044412	0.138203	-0.321353	0.747943	0.898349	FALSE	FALSE	inactive	'1-2	181	183	241	117	229	255	417	172.115	187.719	177.678	163.584	210.125	188.083	232.029
chr7	30353445	30353945	219.426	-0.0300555	0.148996	-0.20172	0.840135	0.937541	FALSE	FALSE	inactive	'1-2	299	277	337	149	242	330	733	284.323	284.142	248.454	208.325	222.054	243.401	407.859
chr7	30599101	30599601	1102.99	-0.0617193	0.0998306	-0.61824	0.536417	0.798355	FALSE	FALSE	inactive	'1-2	1119	882	1341	685	1019	1353	2179	1064.07	904.742	988.657	957.734	935.011	997.945	1212.45
chr7	30927050	30927550	1658.97	-0.133682	0.0778123	-1.718	0.0857961	0.3448	TRUE	TRUE	not-induced	'1-2	1617	1380	2067	986	1649	1865	2458	1537.63	1415.58	1523.9	1378.58	1513.09	1375.59	1367.69
chr7	34503451	34503951	1806.92	-0.334189	0.227253	-1.47056	0.14141	0.44982	TRUE	TRUE	not-induced	'1-2	3319	2229	4055	1909	4846	4669	425	3156.08	2286.47	2989.56	2669.07	4446.58	3443.76	236.48
chr7	34536650	34537150	185.596	-0.0340941	0.119639	-0.284976	0.775663	0.910188	FALSE	FALSE	inactive	'1-2	226	213	310	139	238	311	522	214.906	218.492	228.549	194.343	218.383	229.387	290.454
chr7	34846684	34847184	39.4361	-0.276009	0.257581	-1.07155	0.283924	0.622387	FALSE	FALSE	inactive	'1-2	42	32	58	24	63	64	148	39.9384	32.8251	42.7607	33.5556	57.8074	47.2051	82.3508
chr7	35577000	35577500	1100.13	-0.034071	0.103432	-0.329406	0.741849	0.895164	TRUE	TRUE	not-induced	'1-2	1424	1367	1954	943	1597	1948	2403	1354.1	1402.25	1440.59	1318.46	1465.37	1436.8	1337.09
chr7	36244475	36244975	288.215	-0.192334	0.107943	-1.78182	0.0747788	0.316818	FALSE	FALSE	inactive	'1-2	325	264	448	197	351	398	694	309.047	270.807	330.289	275.436	322.07	293.557	386.159
chr7	36331264	36331698	295.317	-0.0235501	0.148353	-0.158744	0.873871	0.952385	FALSE	FALSE	inactive	'1-2	296	263	303	160	233	289	486	281.47	269.781	223.388	223.704	213.796	213.16	270.422
chr7	36835078	36835578	147.771	-0.0815754	0.157665	-0.517397	0.604879	0.831971	FALSE	FALSE	inactive	'1-2	213	198	220	110	182	197	357	202.545	203.105	162.196	153.797	166.999	145.303	198.644
chr7	40974074	40974574	32.6476	-0.348526	0.242341	-1.43816	0.150388	0.462749	TRUE	TRUE	not-induced	'1-2	55	34	56	23	39	46	48	52.3002	34.8767	41.2862	32.1575	35.7855	33.9287	26.7084
chr7	42349309	42349809	156.671	-0.185771	0.161672	-1.14906	0.250532	0.58785	FALSE	FALSE	inactive	'1-2	229	145	226	154	225	216	568	217.759	148.739	166.619	215.315	206.455	159.317	316.049
chr7	42413050	42413550	463.264	-0.035221	0.112732	-0.312431	0.754713	0.900654	FALSE	FALSE	inactive	'1-2	532	407	607	368	568	686	1123	505.886	417.494	447.513	514.52	521.184	505.98	624.865
chr7	42809675	42810175	357.359	-0.117254	0.117461	-0.998238	0.318164	0.653277	FALSE	FALSE	inactive	'1-2	501	428	615	319	441	478	1004	476.408	439.036	453.411	446.01	404.652	352.563	558.65
chr7	42917925	42918425	137.042	-0.0594917	0.158366	-0.375661	0.707169	0.880066	FALSE	FALSE	inactive	'1-2	197	131	189	106	164	232	309	187.33	134.378	139.341	148.204	150.483	171.118	171.935
chr7	45614250	45614750	8747	-0.140861	0.109042	-1.2918	0.196425	0.527049	TRUE	TRUE	not-induced	'1-2	10907	9280	13753	6220	10356	12208	10007	10371.6	9519.28	10139.4	8696.5	9502.43	9004.37	5568.14
chr7	49575984	49576484	45.6442	-0.228668	0.297938	-0.767501	0.442784	0.742682	FALSE	FALSE	inactive	'1-2	72	41	44	33	54	54	212	68.4658	42.0572	32.4391	46.139	49.5492	39.8293	117.962
chr7	51356945	51358963	2282.37	-0.100839	0.0776341	-1.29891	0.193976	0.524838	FALSE	FALSE	inactive	'1-2	3033	2392	3411	1750	2865	3496	4888	2884.12	2453.68	2514.77	2446.77	2628.86	2578.58	2719.8
chr7	52909834	52910334	279.644	-0.0518557	0.12329	-0.420599	0.674048	0.864957	FALSE	FALSE	inactive	'1-2	374	285	367	231	346	400	660	355.642	292.349	270.572	322.973	317.482	295.032	367.24
chr7	53861175	53861675	537.591	-0.0599024	0.083591	-0.716613	0.473613	0.761253	FALSE	FALSE	inactive	'1-2	643	555	798	401	634	782	1267	611.437	569.311	588.328	560.659	581.744	576.787	704.99
chr7	55009763	55010263	24.1892	0.288695	0.325477	0.886988	0.375085	0.700059	FALSE	FALSE	inactive	'1-2	23	35	33	24	21	19	84	21.871	35.9025	24.3294	33.5556	19.2691	14.014	46.7397
chr7	56173759	56174259	2621.16	-0.0622146	0.101414	-0.613474	0.539563	0.800535	TRUE	TRUE	not-induced	'1-2	2166	1667	2572	1465	2222	2690	1879	2059.68	1709.98	1896.22	2048.29	2038.86	1984.09	1045.52
chr7	56224910	56225447	189.131	0.00991182	0.146719	0.0675566	0.946139	0.980919	FALSE	FALSE	inactive	'1-2	199	145	227	124	155	243	343	189.232	148.739	167.356	173.371	142.224	179.232	190.854
chr7	64290434	64290934	127.928	0.0604882	0.165289	0.365954	0.714399	0.882904	FALSE	FALSE	inactive	'1-2	130	102	148	98	154	198	466	123.619	104.63	109.113	137.019	141.307	146.041	259.294
chr7	64927048	64927548	164.342	-0.117455	0.133116	-0.882354	0.377585	0.701819	FALSE	FALSE	inactive	'1-2	163	171	243	109	202	206	525	154.999	175.409	179.153	152.399	185.351	151.941	292.123
chr7	67711295	67711795	3046.92	-0.266817	0.135144	-1.97432	0.0483451	0.242642	TRUE	TRUE	not-induced	'1-2	2003	1465	2987	1324	2509	2674	1769	1904.68	1502.77	2202.18	1851.15	2302.2	1972.29	984.315
chr7	72350486	72350986	4360.93	-0.110173	0.135151	-0.815184	0.414967	0.727872	TRUE	TRUE	not-induced	'1-2	3740	2798	4186	2170	3206	4034	4944	3556.42	2870.15	3086.14	3033.99	2941.75	2975.4	2750.96
chr7	73155704	73158397	177326	-0.195645	0.190608	-1.02642	0.304691	0.641269	TRUE	TRUE	not-induced	'1-2	48544	38653	78923	37572	72257	77044	11365	46161.1	39649.7	58186.2	52531.3	66301.4	56826.1	6323.76
chr7	73241551	73242696	2868.57	-0.148631	0.0679059	-2.18877	0.0286133	0.16686	FALSE	FALSE	inactive	'1-2	2849	2284	3569	1764	3046	3425	5598	2709.15	2342.89	2631.26	2466.34	2794.94	2526.21	3114.86
chr7	73864225	73864725	1345.47	-0.14292	0.097818	-1.46108	0.143995	0.453921	FALSE	FALSE	inactive	'1-2	1684	1412	2161	975	1940	2282	4025	1601.34	1448.41	1593.2	1363.2	1780.1	1683.16	2239.61
chr7	75623722	75624063	4635.45	0.0389255	0.0604611	0.64381	0.519698	0.790613	TRUE	TRUE	not-induced	'1-2	4854	4658	6134	3258	5027	6489	5990	4615.73	4778.11	4522.31	4555.18	4612.66	4786.15	3332.98
chr7	78263415	78263915	390.904	-0.000145231	0.194263	-0.000747599	0.999404	1	FALSE	FALSE	inactive	'1-2	266	224	326	184	211	275	453	252.943	229.776	240.345	257.26	193.609	202.834	252.06
chr7	78685030	78685781	145.526	-0.0801949	0.246968	-0.324717	0.745395	0.896885	FALSE	FALSE	inactive	'1-2	94	85	147	56	79	122	245	89.3859	87.1917	108.376	78.2965	72.4886	89.9847	136.324
chr7	80171701	80172163	17.1285	-0.555371	0.290518	-1.91165	0.0559206	0.267249	TRUE	TRUE	not-induced	'1-2	39	22	61	26	43	35	19	37.0856	22.5673	44.9724	36.3519	39.4558	25.8153	10.5721
chr7	80284121	80284426	187	-0.0940645	0.146046	-0.644074	0.519527	0.790539	FALSE	FALSE	inactive	'1-2	157	136	215	103	167	201	384	149.293	139.507	158.509	144.01	153.235	148.253	213.667
chr7	85140759	85141259	4.87974	-1.41127	0.789216	-1.78819	0.073745	0.313892	TRUE	FALSE	NULL	'1-2	12	2	21	2	3	8	15	11.411	2.05157	15.4823	2.7963	2.75273	5.90064	8.34637
chr7	87094452	87094952	5.07603	-0.230194	0.641748	-0.358698	0.719821	0.885905	FALSE	FALSE	inactive	'1-2	10	5	3	1	6	9	15	9.50914	5.12892	2.21176	1.39815	5.50546	6.63822	8.34637
chr7	95063948	95064448	5457.97	0.0217832	0.112331	0.19392	0.846239	0.939536	TRUE	TRUE	not-induced	'1-2	3052	2857	4422	2379	3782	4774	3531	2902.19	2930.67	3260.13	3326.2	3470.28	3521.2	1964.73
chr7	95526645	95527145	93.4956	0.178735	0.191753	0.932113	0.351278	0.680429	FALSE	FALSE	inactive	'1-2	84	69	108	61	83	146	317	79.8767	70.7791	79.6234	85.2872	76.1589	107.687	176.387
chr7	95529399	95529899	296.067	-0.146709	0.149177	-0.983457	0.325383	0.65995	FALSE	FALSE	inactive	'1-2	337	340	446	162	370	423	782	320.458	348.767	328.815	226.501	339.504	311.996	435.124
chr7	96225234	96226107	295.64	-0.00272889	0.141889	-0.0192326	0.984656	0.995323	FALSE	FALSE	inactive	'1-2	340	319	362	216	337	365	947	323.311	327.225	266.886	302.001	309.224	269.217	526.934
chr7	99102008	99103129	4072.94	-0.0942212	0.0905046	-1.04107	0.297845	0.635087	TRUE	TRUE	not-induced	'1-2	3280	2712	4253	2102	3370	4113	4608	3119	2781.93	3135.54	2938.91	3092.24	3033.66	2564
chr7	100642327	100642827	2641.46	-0.0478053	0.126411	-0.378173	0.705302	0.878977	FALSE	FALSE	inactive	'1-2	2987	2384	3500	1848	3034	3937	8875	2840.38	2445.47	2580.39	2583.78	2783.93	2903.85	4938.27
chr7	100930087	100930429	1615.58	-0.09026	0.0924322	-0.9765	0.328817	0.662109	FALSE	FALSE	inactive	'1-2	1607	1371	2097	1015	1626	1983	3625	1528.12	1406.35	1546.02	1419.12	1491.98	1462.62	2017.04
chr7	100933391	100933891	757.075	-0.207323	0.0988838	-2.09663	0.0360262	0.197522	FALSE	FALSE	inactive	'1-2	1041	843	1326	601	1080	1161	2022	989.901	864.737	977.598	840.289	990.984	856.33	1125.09
chr7	102998859	102999359	101.292	-0.398348	0.219451	-1.8152	0.069493	0.30453	FALSE	FALSE	inactive	'1-2	129	87	136	42	123	138	248	122.668	89.2433	100.266	58.7224	112.862	101.786	137.993
chr7	103073128	103073628	223.776	-0.150452	0.129446	-1.16228	0.245124	0.581384	FALSE	FALSE	inactive	'1-2	240	197	295	168	298	288	632	228.219	202.08	217.49	234.889	273.438	212.423	351.66
chr7	106267191	106267742	172.333	-0.351873	0.189205	-1.85975	0.0629211	0.287311	TRUE	FALSE	not-induced	'1-2	103	84	139	54	118	108	168	97.9441	86.1659	102.478	75.5002	108.274	79.6586	93.4793
chr7	107204298	107204798	13006.9	-0.10236	0.0876752	-1.16749	0.243013	0.57885	TRUE	TRUE	not-induced	'1-2	7568	5889	9432	5223	8110	9184	2042	7196.51	6040.85	6953.77	7302.55	7441.55	6773.93	1136.22
chr7	108169774	108170274	134.647	0.121382	0.151355	0.801967	0.422572	0.73067	FALSE	FALSE	inactive	'1-2	119	119	175	92	109	168	406	113.159	122.068	129.019	128.63	100.016	123.913	225.908
chr7	111405921	111406421	96.7647	-0.348875	0.187291	-1.86274	0.0624987	0.285974	FALSE	FALSE	inactive	'1-2	105	66	165	58	121	148	248	99.8459	67.7018	121.647	81.0928	111.027	109.162	137.993
chr7	111897159	111897659	59.3788	-0.00645796	0.20668	-0.0312462	0.975073	0.992071	FALSE	FALSE	inactive	'1-2	66	79	107	45	62	76	120	62.7603	81.037	78.8861	62.9168	56.8898	56.056	66.7709
chr7	114173137	114173637	210.429	-0.328898	0.118025	-2.78668	0.00532511	0.0419988	TRUE	TRUE	not-induced	'1-2	339	227	402	206	351	317	314	322.36	232.853	296.376	288.019	322.07	233.813	174.717
chr7	115335350	115335850	190.882	-0.18279	0.136676	-1.3374	0.181092	0.508548	FALSE	FALSE	inactive	'1-2	151	164	257	107	204	194	615	143.588	168.229	189.474	149.602	187.186	143.09	342.201
chr7	115979624	115980079	42.3749	1.04515	0.26826	3.89603	9.77834e-05	0.0010932	FALSE	FALSE	inactive	'1-2	26	63	34	45	35	59	136	24.7238	64.6244	25.0666	62.9168	32.1152	43.5172	75.6737
chr7	117578045	117578545	174.194	-0.131189	0.133345	-0.983832	0.325198	0.65995	FALSE	FALSE	inactive	'1-2	186	155	286	144	247	273	472	176.87	158.997	210.854	201.334	226.642	201.359	262.632
chr7	118920502	118921002	27.4064	0.234199	0.395377	0.592343	0.553621	0.808273	FALSE	FALSE	inactive	'1-2	43	36	31	14	13	42	97	40.8893	36.9282	22.8549	19.5741	11.9285	30.9783	53.9732
chr7	120009412	120009912	37.1283	0.189596	0.313405	0.604953	0.54521	0.804205	FALSE	FALSE	inactive	'1-2	37	48	36	12	26	40	116	35.1838	49.2377	26.5411	16.7778	23.857	29.5032	64.5452
chr7	120590446	120591225	7339.95	0.0996183	0.183489	0.542913	0.58719	0.823004	TRUE	TRUE	not-induced	'1-2	3600	3389	4913	2963	4074	5337	2416	3423.29	3476.38	3622.13	4142.72	3738.21	3936.46	1344.32
chr7	124413080	124413573	319.991	-0.0535464	0.159049	-0.336666	0.736369	0.892533	FALSE	FALSE	inactive	'1-2	253	175	284	181	268	323	648	240.581	179.512	209.38	253.065	245.911	238.238	360.563
chr7	124728686	124729186	1.01191	1.90277	2.07839	0.915503	0.359928	0.686043	FALSE	TRUE	NULL	'1-2	0	0	0	0	0	2	1	0	0	0	0	0	1.47516	0.556424
chr7	127344195	127344695	199.284	-0.0133146	0.153726	-0.0866126	0.930979	0.974413	FALSE	FALSE	inactive	'1-2	157	155	241	103	180	246	545	149.293	158.997	177.678	144.01	165.164	181.445	303.251
chr7	127487797	127488564	337.325	-0.087145	0.149233	-0.583953	0.559252	0.810535	FALSE	FALSE	inactive	'1-2	267	320	463	160	310	372	844	253.894	328.251	341.348	223.704	284.449	274.38	469.622
chr7	128023775	128024275	1117.41	-0.106206	0.143833	-0.738395	0.460274	0.754349	FALSE	FALSE	inactive	'1-2	1024	824	1099	552	1044	1254	2240	973.735	845.247	810.241	771.78	957.951	924.925	1246.39
chr7	128530685	128531185	5934.32	0.686254	0.344006	1.99489	0.0460548	0.235309	FALSE	TRUE	not-induced	'1-2	5000	9659	9233	5387	6861	15311	12866	4754.57	9908.05	6807.06	7531.84	6295.5	11293.1	7158.96
chr7	130832399	130833576	753.58	0.0669223	0.105568	0.633927	0.526129	0.793265	FALSE	FALSE	inactive	'1-2	575	557	760	406	606	815	1484	546.775	571.362	560.312	567.649	556.052	601.127	825.734
chr7	131802003	131802373	1117.62	1.43654	0.24471	5.87037	4.34835e-09	7.34953e-08	TRUE	TRUE	induced	'1-2	626	1897	968	1408	849	2357	1100	595.272	1945.91	713.661	1968.6	779.023	1738.47	612.067
chr7	131831645	131832145	500.801	-0.11612	0.0978164	-1.18712	0.23518	0.570296	FALSE	FALSE	inactive	'1-2	568	478	675	343	540	606	1544	540.119	490.325	497.646	479.566	495.492	446.973	859.119
chr7	134216941	134217326	301.209	-0.0316934	0.156652	-0.202317	0.839669	0.937343	FALSE	FALSE	inactive	'1-2	333	356	427	237	394	376	610	316.654	365.179	314.807	331.362	361.525	277.33	339.419
chr7	134889087	134889587	995.404	-0.103366	0.0882222	-1.17166	0.241335	0.576969	TRUE	TRUE	not-induced	'1-2	907	718	1098	553	788	981	1303	862.479	736.513	809.504	773.178	723.051	723.565	725.021
chr7	135761670	135762170	736.555	0.0860129	0.0973665	0.883393	0.377024	0.701322	FALSE	FALSE	inactive	'1-2	657	710	903	502	706	858	1914	624.75	728.307	665.74	701.872	647.81	632.843	1065
chr7	139336014	139336442	630.611	0.904607	0.1537	5.88553	3.9677e-09	6.72206e-08	TRUE	TRUE	not-induced	'1-2	526	943	580	645	591	1194	831	500.181	967.315	427.607	901.808	542.288	880.67	462.389
chr7	154585681	154586021	5556.91	0.439847	0.13458	3.2683	0.00108194	0.0101381	TRUE	TRUE	not-induced	'1-2	4286	5003	5647	4360	4789	8012	5535	4075.62	5132	4163.27	6095.94	4394.28	5909.49	3079.81
chr7	154955345	154955845	442.655	-0.0658097	0.0892203	-0.73761	0.460752	0.754597	FALSE	FALSE	inactive	'1-2	497	410	622	305	462	604	982	472.604	420.572	458.572	426.436	423.921	445.498	546.409
chr7	156698803	156699303	658.61	-0.170975	0.111949	-1.52726	0.126697	0.427072	FALSE	FALSE	inactive	'1-2	739	620	899	377	638	769	1794	702.725	635.987	662.791	527.103	585.414	567.199	998.225
chr7	157779867	157780289	2415.13	3.02876	0.327206	9.25643	2.11373e-20	8.56212e-19	FALSE	TRUE	induced	'1-2	539	4671	784	3790	730	5799	1517	512.542	4791.44	578.007	5298.99	669.831	4277.22	844.096
chr7	158319986	158320486	3033.87	-0.104664	0.108269	-0.966702	0.333693	0.666408	FALSE	FALSE	inactive	'1-2	2281	1966	3016	1510	2385	2705	4239	2169.03	2016.69	2223.56	2111.21	2188.42	1995.15	2358.68
chr7	158816899	158817399	8215.89	0.101468	0.0794969	1.27638	0.201822	0.534417	TRUE	TRUE	not-induced	'1-2	10420	9699	11958	7110	9200	12553	11709	9908.52	9949.09	8816.07	9940.86	8441.71	9258.84	6515.17
chr8	1906208	1906708	620.635	-0.0785669	0.0898029	-0.874882	0.381638	0.704723	FALSE	FALSE	inactive	'1-2	910	824	1078	512	941	1111	1643	865.331	845.247	794.759	715.854	863.44	819.451	914.205
chr8	3305042	3305542	282.858	-0.141285	0.131274	-1.07625	0.281814	0.620068	FALSE	FALSE	inactive	'1-2	263	220	398	187	344	393	523	250.09	225.673	293.427	261.454	315.647	289.869	291.01
chr8	6633635	6634135	804.767	-0.246189	0.0678206	-3.63001	0.000283414	0.00295805	TRUE	FALSE	not-induced	'1-2	990	779	1279	543	977	1063	1447	941.404	799.086	942.947	759.196	896.473	784.047	805.146
chr8	8318885	8320252	1967.82	-0.200142	0.138973	-1.44015	0.149825	0.462518	TRUE	TRUE	not-induced	'1-2	2961	2053	3599	1786	2284	2695	2242	2815.66	2105.94	2653.37	2497.1	2095.75	1987.78	1247.5
chr8	17820498	17820998	224.358	-0.118037	0.138493	-0.852297	0.394049	0.713584	FALSE	FALSE	inactive	'1-2	245	198	351	157	230	306	428	232.974	203.105	258.776	219.51	211.043	225.699	238.15
chr8	18138201	18138701	422.761	-0.127631	0.117273	-1.08833	0.276451	0.615008	TRUE	TRUE	not-induced	'1-2	556	443	689	330	497	612	666	528.708	454.423	507.968	461.39	456.036	451.399	370.579
chr8	18175200	18175503	307.095	0.0265585	0.166918	0.159112	0.873581	0.952385	FALSE	FALSE	inactive	'1-2	387	293	464	281	299	425	850	368.004	300.555	342.086	392.881	274.356	313.471	472.961
chr8	20899053	20899553	911.081	-0.0845617	0.0732973	-1.15368	0.248631	0.585117	FALSE	FALSE	inactive	'1-2	875	795	1117	567	952	1054	1616	832.049	815.499	823.512	792.752	873.534	777.409	899.182
chr8	22423301	22423801	1996.53	-0.0742202	0.153395	-0.483849	0.628493	0.843147	FALSE	FALSE	inactive	'1-2	1254	1231	1876	880	1479	1685	2408	1192.45	1262.74	1383.09	1230.37	1357.1	1242.82	1339.87
chr8	22516637	22517137	952.543	-0.129188	0.100496	-1.28549	0.19862	0.530139	TRUE	FALSE	not-induced	'1-2	1152	805	1205	682	964	1148	1622	1095.45	825.757	888.39	953.539	884.545	846.741	902.52
chr8	22722309	22722809	3871.96	-0.149373	0.134221	-1.11289	0.265755	0.601903	TRUE	TRUE	not-induced	'1-2	5727	4382	7424	3510	6990	8432	6368	5445.88	4494.99	5473.37	4907.51	6413.87	6219.27	3543.31
chr8	23115635	23116135	827.525	-0.0982435	0.0794976	-1.2358	0.216531	0.550841	FALSE	FALSE	inactive	'1-2	968	791	1225	612	963	1168	1733	920.484	811.396	903.135	855.669	883.627	861.493	964.284
chr8	27386551	27387051	428.247	-0.0714875	0.14374	-0.49734	0.618949	0.838976	FALSE	FALSE	inactive	'1-2	598	587	715	325	503	578	1066	568.646	602.136	527.136	454.399	461.541	426.321	593.148
chr8	29940148	29941055	86285.8	-0.0542196	0.1265	-0.428612	0.668205	0.863462	TRUE	TRUE	not-induced	'1-2	71372	53464	85750	48471	67804	86178	25037	67868.6	54842.6	63219.5	67769.8	62215.4	63563.1	13931.2
chr8	30014934	30015434	280.167	-0.0605601	0.111683	-0.542251	0.587646	0.823004	FALSE	FALSE	inactive	'1-2	304	293	390	208	333	350	706	289.078	300.555	287.529	290.816	305.553	258.153	392.836
chr8	32211147	32211647	333.003	-0.393554	0.1339	-2.93916	0.00329101	0.0274232	FALSE	FALSE	inactive	'1-2	500	280	503	214	481	523	1357	475.457	287.22	370.838	299.204	441.355	385.754	755.068
chr8	32962190	32962665	1660.7	0.110999	0.137088	0.809694	0.418116	0.729245	TRUE	TRUE	not-induced	'1-2	600	530	850	496	590	873	445	570.548	543.666	626.665	693.483	541.371	643.907	247.609
chr8	33543622	33544122	107.881	-0.269049	0.176578	-1.52369	0.127586	0.428756	TRUE	TRUE	not-induced	'1-2	139	120	190	60	171	193	208	132.177	123.094	140.078	83.8891	156.906	142.353	115.736
chr8	33687508	33687845	371.844	-0.099268	0.104252	-0.952192	0.340999	0.671989	FALSE	FALSE	inactive	'1-2	426	368	561	265	424	514	824	405.089	377.489	413.599	370.51	389.053	379.116	458.494
chr8	35915897	35916397	214.919	0.0997412	0.143472	0.695198	0.486931	0.770243	TRUE	TRUE	not-induced	'1-2	190	168	261	183	232	278	300	180.674	172.332	192.423	255.862	212.878	205.047	166.927
chr8	36716347	36716847	39.6027	-0.197435	0.242949	-0.812662	0.416412	0.728021	FALSE	FALSE	inactive	'1-2	36	44	74	23	61	64	135	34.2329	45.1345	54.5567	32.1575	55.9722	47.2051	75.1173
chr8	36792772	36793272	154.29	-0.0289364	0.184986	-0.156425	0.875698	0.953305	FALSE	FALSE	inactive	'1-2	103	115	207	88	124	161	417	97.9441	117.965	152.611	123.037	113.78	118.75	232.029
chr8	36967315	36967790	13.0644	-0.10404	0.480436	-0.216554	0.828556	0.932574	FALSE	FALSE	inactive	'1-2	20	32	30	3	16	19	47	19.0183	32.8251	22.1176	4.19445	14.6812	14.014	26.1519
chr8	37000143	37000926	2241.54	-0.17202	0.195834	-0.878398	0.379728	0.703495	TRUE	TRUE	not-induced	'1-2	2389	1907	3260	1503	2904	3329	2026	2271.73	1956.17	2403.45	2101.42	2664.64	2455.4	1127.32
chr8	37056511	37057011	17.6179	-0.346395	0.409123	-0.846679	0.397174	0.716166	FALSE	FALSE	inactive	'1-2	24	11	23	6	18	30	56	22.8219	11.2836	16.9568	8.38891	16.5164	22.1274	31.1598
chr8	37183047	37183547	233.754	-0.140923	0.123858	-1.13778	0.255213	0.591712	FALSE	FALSE	inactive	'1-2	238	244	348	143	292	309	559	226.317	250.291	256.564	199.936	267.933	227.912	311.041
chr8	37398547	37399047	836.421	-0.0978034	0.0893785	-1.09426	0.273841	0.612011	FALSE	FALSE	inactive	'1-2	1051	779	1208	656	1059	1293	2268	999.41	799.086	890.602	917.187	971.714	953.69	1261.97
chr8	37429972	37430472	67.0201	-0.286996	0.182105	-1.576	0.115026	0.404804	TRUE	FALSE	not-induced	'1-2	103	68	100	53	85	84	146	97.9441	69.7534	73.7253	74.102	77.9941	61.9567	81.238
chr8	37456042	37457849	2073.44	0.195001	0.0744063	2.62076	0.00877343	0.0647102	TRUE	TRUE	not-induced	'1-2	1866	1960	2156	1347	1813	2520	2622	1774.4	2010.54	1589.52	1883.31	1663.57	1858.7	1458.94
chr8	37532645	37533288	1571.11	-0.0837488	0.103754	-0.807186	0.419559	0.72983	FALSE	FALSE	inactive	'1-2	1337	1172	1705	920	1424	1539	2411	1271.37	1202.22	1257.02	1286.3	1306.63	1135.13	1341.54
chr8	37602772	37603272	50.3545	0.579563	0.294813	1.96586	0.0493143	0.245439	FALSE	FALSE	inactive	'1-2	32	41	54	61	41	53	124	30.4292	42.0572	39.8117	85.2872	37.6207	39.0917	68.9966
chr8	37743177	37744218	630.568	0.112629	0.0925527	1.21692	0.223635	0.558721	FALSE	TRUE	not-induced	'1-2	644	697	815	488	741	882	1184	612.388	714.972	600.861	682.298	679.925	650.545	658.807
chr8	38080447	38080947	64.0988	-0.502715	0.235008	-2.13914	0.0324247	0.183547	TRUE	FALSE	not-induced	'1-2	99	33	103	56	86	88	126	94.1404	33.8509	75.9371	78.2965	78.9117	64.907	70.1095
chr8	38373747	38374247	620.733	-0.137818	0.0860223	-1.60212	0.10913	0.392369	FALSE	FALSE	inactive	'1-2	672	584	913	445	657	719	1895	639.014	599.058	673.112	622.177	602.848	530.32	1054.42
chr8	38514972	38515472	298.904	-0.0844202	0.118598	-0.711818	0.476577	0.763367	FALSE	FALSE	inactive	'1-2	323	328	444	198	356	396	753	307.145	336.457	327.34	276.834	326.658	292.081	418.988
chr8	38550022	38550522	425.924	-0.276082	0.101121	-2.73022	0.00632913	0.0489191	FALSE	FALSE	inactive	'1-2	432	340	553	223	475	499	932	410.795	348.767	407.701	311.788	435.849	368.052	518.588
chr8	38598172	38598672	322.023	-0.0800215	0.122568	-0.652873	0.513838	0.786825	FALSE	FALSE	inactive	'1-2	364	316	498	215	333	457	667	346.133	324.148	367.152	300.603	305.553	337.074	371.135
chr8	38605897	38606397	8.63247	0.0747191	0.470604	0.158773	0.873848	0.952385	FALSE	FALSE	inactive	'1-2	13	7	14	10	10	17	21	12.3619	7.18049	10.3215	13.9815	9.17577	12.5389	11.6849
chr8	38851672	38852172	46.3392	-0.273764	0.285558	-0.958698	0.337711	0.670042	FALSE	FALSE	inactive	'1-2	46	54	70	30	61	40	135	43.742	55.3924	51.6077	41.9445	55.9722	29.5032	75.1173
chr8	39242056	39242556	5.56329	-0.0572164	0.732989	-0.078059	0.937781	0.977366	FALSE	FALSE	inactive	'1-2	11	10	4	0	5	8	27	10.46	10.2578	2.94901	0	4.58789	5.90064	15.0235
chr8	41942747	41943247	388.362	0.0870086	0.112926	0.770494	0.441007	0.741702	FALSE	FALSE	inactive	'1-2	377	360	469	242	349	511	1067	358.494	369.282	345.772	338.353	320.235	376.903	593.705
chr8	47402597	47403097	101.536	-0.0645005	0.160209	-0.402602	0.687241	0.871437	FALSE	FALSE	inactive	'1-2	117	104	162	75	104	138	230	111.257	106.682	119.435	104.861	95.428	101.786	127.978
chr8	49512841	49513341	577.986	-0.0728942	0.0979088	-0.744512	0.456567	0.750997	FALSE	FALSE	inactive	'1-2	702	509	828	453	622	819	1131	667.541	522.124	610.446	633.363	570.733	604.078	629.316
chr8	50276245	50276745	3.26335	-1.11105	0.955115	-1.16327	0.244721	0.58108	FALSE	FALSE	inactive	'1-2	4	0	4	3	7	3	16	3.80365	0	2.94901	4.19445	6.42304	2.21274	8.90279
chr8	53013410	53013910	1866.52	-0.0564461	0.103692	-0.544361	0.586193	0.822674	TRUE	TRUE	not-induced	'1-2	1158	1140	1886	903	1333	1556	1794	1101.16	1169.39	1390.46	1262.53	1223.13	1147.67	998.225
chr8	53744522	53745022	263.534	-0.265821	0.143274	-1.85533	0.0635484	0.289112	TRUE	TRUE	not-induced	'1-2	312	273	436	212	410	344	434	296.685	280.039	321.442	296.408	376.207	253.727	241.488
chr8	54972235	54972735	243.201	-0.0930274	0.120269	-0.773492	0.439231	0.74078	FALSE	FALSE	inactive	'1-2	240	226	304	172	305	293	748	228.219	231.827	224.125	240.482	279.861	216.111	416.205
chr8	55705155	55705655	31.7689	-0.424869	0.289392	-1.46814	0.142065	0.450543	FALSE	FALSE	inactive	'1-2	62	25	49	27	35	43	96	58.9566	25.6446	36.1254	37.7501	32.1152	31.7159	53.4167
chr8	57259220	57259720	62.1554	0.175161	0.202702	0.864133	0.387515	0.708291	FALSE	FALSE	inactive	'1-2	58	63	75	45	71	94	272	55.153	64.6244	55.294	62.9168	65.148	69.3325	151.347
chr8	59044209	59044709	228.113	-0.118981	0.13951	-0.852846	0.393745	0.713395	FALSE	FALSE	inactive	'1-2	266	235	328	167	266	282	679	252.943	241.059	241.819	233.491	244.076	207.997	377.812
chr8	61157672	61158172	39.6719	-0.731338	0.281701	-2.59615	0.00942754	0.0688579	FALSE	FALSE	inactive	'1-2	55	35	42	21	73	34	97	52.3002	35.9025	30.9646	29.3612	66.9831	25.0777	53.9732
chr8	61447681	61448181	84.9876	-0.281175	0.2661	-1.05665	0.290671	0.628055	FALSE	FALSE	inactive	'1-2	86	76	151	69	96	82	196	81.7786	77.9596	111.325	96.4725	88.0874	60.4815	109.059
chr8	72664201	72664701	740.94	0.0826239	0.174969	0.472221	0.636769	0.847073	TRUE	TRUE	not-induced	'1-2	170	220	299	149	262	305	334	161.655	225.673	220.439	208.325	240.405	224.962	185.846
chr8	75200907	75201407	312.667	0.0326058	0.143379	0.22741	0.820105	0.928258	FALSE	FALSE	inactive	'1-2	354	351	412	206	336	433	1175	336.623	360.05	303.748	288.019	308.306	319.372	653.799
chr8	76700770	76701270	11.6901	-0.79123	0.434477	-1.82111	0.0685906	0.302522	TRUE	FALSE	not-induced	'1-2	17	6	23	7	10	12	17	16.1655	6.15471	16.9568	9.78706	9.17577	8.85095	9.45922
chr8	81123406	81123906	391.438	-0.0269343	0.103121	-0.26119	0.793946	0.918389	FALSE	FALSE	inactive	'1-2	422	356	505	290	475	561	1122	401.286	365.179	372.313	405.464	435.849	413.782	624.308
chr8	82385670	82386170	157.234	-0.0995047	0.168293	-0.591259	0.554347	0.808691	FALSE	FALSE	inactive	'1-2	230	185	213	119	185	207	646	218.71	189.77	157.035	166.38	169.752	152.679	359.45
chr8	88257670	88258170	4.09944	-1.20362	0.854361	-1.40879	0.158897	0.474137	FALSE	FALSE	inactive	'1-2	5	1	4	0	8	6	28	4.75457	1.02578	2.94901	0	7.34062	4.42548	15.5799
chr8	91923976	91924476	86.5431	-0.159727	0.215042	-0.742769	0.457621	0.751901	FALSE	FALSE	inactive	'1-2	99	113	127	46	107	101	267	94.1404	115.914	93.6312	64.315	98.1808	74.4955	148.565
chr8	92046669	92047169	118.802	-0.0210541	0.161781	-0.13014	0.896456	0.962479	FALSE	FALSE	inactive	'1-2	122	114	170	89	132	159	244	116.011	116.939	125.333	124.435	121.12	117.275	135.768
chr8	95319737	95320237	441.262	-0.0396704	0.110155	-0.360134	0.718747	0.88514	FALSE	FALSE	inactive	'1-2	446	417	556	278	403	485	789	424.107	427.752	409.913	388.686	369.784	357.726	439.019
chr8	95476244	95476744	125.108	-0.222371	0.208932	-1.06432	0.287182	0.624835	FALSE	FALSE	inactive	'1-2	153	111	213	82	103	153	278	145.49	113.862	157.035	114.648	94.5105	112.85	154.686
chr8	96734414	96734914	221.924	-0.0303061	0.140256	-0.216077	0.828928	0.932681	FALSE	FALSE	inactive	'1-2	213	228	374	157	255	331	595	202.545	233.879	275.733	219.51	233.982	244.139	331.073
chr8	97865412	97865832	110.045	0.0343064	0.192326	0.178377	0.858427	0.946315	FALSE	FALSE	inactive	'1-2	88	68	99	57	79	114	181	83.6804	69.7534	72.9881	79.6946	72.4886	84.0841	100.713
chr8	100471970	100472470	15.5604	0.361572	0.548951	0.65866	0.510114	0.785412	FALSE	FALSE	inactive	'1-2	15	21	36	10	7	34	39	14.2637	21.5415	26.5411	13.9815	6.42304	25.0777	21.7006
chr8	100702345	100702845	18.0261	-0.0775151	0.405287	-0.19126	0.848322	0.94076	FALSE	FALSE	inactive	'1-2	16	10	13	11	21	21	58	15.2146	10.2578	9.58429	15.3797	19.2691	15.4892	32.2726
chr8	101613894	101614394	656.982	-0.089969	0.1106	-0.813459	0.415955	0.728021	FALSE	FALSE	inactive	'1-2	606	616	981	434	677	774	1345	576.254	631.883	723.245	606.798	621.2	570.887	748.391
chr8	102165897	102166397	343.672	-0.113981	0.10939	-1.04197	0.297424	0.634567	FALSE	FALSE	inactive	'1-2	360	341	476	231	438	457	1175	342.329	349.793	350.933	322.973	401.899	337.074	653.799
chr8	102475019	102475519	270.192	0.118058	0.118342	0.997601	0.318473	0.653546	TRUE	TRUE	not-induced	'1-2	305	304	365	204	294	407	408	290.029	311.839	269.097	285.223	269.768	300.195	227.021
chr8	102895269	102895769	88.5816	-0.0957176	0.187126	-0.511514	0.608991	0.833973	FALSE	FALSE	inactive	'1-2	79	88	137	47	80	105	219	75.1222	90.2691	101.004	65.7131	73.4062	77.4458	121.857
chr8	103412556	103413056	144.738	-0.16099	0.16778	-0.959532	0.337291	0.670036	FALSE	FALSE	inactive	'1-2	149	154	251	82	140	182	475	141.686	157.971	185.051	114.648	128.461	134.239	264.302
chr8	104320806	104321306	308.464	-0.0518662	0.151175	-0.343088	0.731532	0.890683	FALSE	FALSE	inactive	'1-2	311	262	375	188	280	363	563	295.734	268.756	276.47	262.852	256.922	267.741	313.267
chr8	104456844	104457344	675.331	0.0034774	0.0845121	0.0411467	0.967179	0.989005	FALSE	FALSE	inactive	'1-2	779	686	1044	578	825	1038	1669	740.762	703.688	769.692	808.132	757.001	765.608	928.672
chr8	109596610	109597110	255.463	0.0735656	0.127515	0.576916	0.563996	0.812709	FALSE	FALSE	inactive	'1-2	235	219	326	186	276	365	652	223.465	224.647	240.345	260.056	253.251	269.217	362.789
chr8	110463019	110463519	361.413	-0.102491	0.104498	-0.980794	0.326694	0.660736	FALSE	FALSE	inactive	'1-2	394	376	590	283	423	464	1207	374.66	385.695	434.979	395.677	388.135	342.237	671.604
chr8	110615456	110615956	218.667	-0.0857214	0.173347	-0.494506	0.620949	0.840147	FALSE	FALSE	inactive	'1-2	212	226	267	105	217	246	549	201.594	231.827	196.847	146.806	199.114	181.445	305.477
chr8	110649886	110651049	1862.33	0.0715017	0.200016	0.357481	0.720732	0.886058	TRUE	TRUE	not-induced	'1-2	1049	1126	1445	821	1622	1933	1538	997.508	1155.03	1065.33	1147.88	1488.31	1425.74	855.781
chr8	111945833	111946333	1522.52	1.49725	0.137488	10.89	1.28649e-27	9.06183e-26	FALSE	TRUE	induced	'1-2	1241	3683	1654	2522	1363	4073	2368	1180.08	3777.97	1219.42	3526.14	1250.66	3004.16	1317.61
chr8	115827531	115828031	12.432	-0.44745	0.494891	-0.904139	0.365922	0.692245	FALSE	FALSE	inactive	'1-2	11	8	16	7	27	21	46	10.46	8.20628	11.7961	9.78706	24.7746	15.4892	25.5955
chr8	115900020	115900520	45.9922	-0.150666	0.242037	-0.622491	0.533619	0.796656	FALSE	FALSE	inactive	'1-2	58	48	88	30	52	79	206	55.153	49.2377	64.8783	41.9445	47.714	58.2688	114.623
chr8	116361819	116362319	636.29	-0.0178217	0.0829152	-0.214939	0.829815	0.932777	FALSE	FALSE	inactive	'1-2	585	574	798	430	615	691	1538	556.284	588.8	588.328	601.205	564.31	509.667	855.781
chr8	116794621	116794995	61.0128	-0.082415	0.251235	-0.32804	0.742882	0.895816	FALSE	FALSE	inactive	'1-2	56	44	66	36	70	81	175	53.2512	45.1345	48.6587	50.3335	64.2304	59.7439	97.3743
chr8	116990476	116990812	89.066	-0.238349	0.179118	-1.33068	0.183294	0.511199	TRUE	FALSE	not-induced	'1-2	103	84	157	70	137	140	187	97.9441	86.1659	115.749	97.8706	125.708	103.261	104.051
chr8	117124673	117128222	338.201	-0.174533	0.135431	-1.28872	0.197495	0.528689	FALSE	FALSE	inactive	'1-2	327	289	397	200	384	367	693	310.949	296.452	292.69	279.63	352.35	270.692	385.602
chr8	117368914	117369414	178.189	-0.0361693	0.143509	-0.252035	0.801014	0.921086	FALSE	FALSE	inactive	'1-2	195	144	234	147	220	262	504	185.428	147.713	172.517	205.528	201.867	193.246	280.438
chr8	119212969	119213469	534.785	-0.159027	0.113004	-1.40727	0.159347	0.474984	FALSE	FALSE	inactive	'1-2	639	526	786	338	534	663	1278	607.634	539.563	579.481	472.575	489.986	489.015	711.11
chr8	119362119	119362619	155.781	-0.0468428	0.13497	-0.347062	0.728545	0.889469	FALSE	FALSE	inactive	'1-2	168	176	241	128	213	216	426	159.753	180.538	177.678	178.963	195.444	159.317	237.037
chr8	119716469	119716969	137.372	0.140691	0.147864	0.951494	0.341354	0.672155	FALSE	FALSE	inactive	'1-2	146	175	236	115	164	232	421	138.833	179.512	173.992	160.787	150.483	171.118	234.255
chr8	119926590	119926877	554.559	-0.180691	0.142488	-1.26811	0.204758	0.539007	TRUE	FALSE	not-induced	'1-2	684	589	849	408	687	691	1029	650.425	604.187	625.928	570.446	630.376	509.667	572.561
chr8	120437910	120438252	34.5821	-0.581835	0.293139	-1.98484	0.0471623	0.238717	FALSE	FALSE	inactive	'1-2	51	15	45	19	42	49	114	48.4966	15.3868	33.1764	26.5649	38.5382	36.1414	63.4324
chr8	120449516	120450016	76.5745	-0.239498	0.189086	-1.26661	0.205296	0.539335	FALSE	FALSE	inactive	'1-2	70	56	113	46	93	103	290	66.5639	57.4439	83.3096	64.315	85.3347	75.9707	161.363
chr8	122097569	122098069	942.913	-0.11585	0.112089	-1.03355	0.301346	0.638151	FALSE	FALSE	inactive	'1-2	860	612	1043	547	803	1020	1878	817.786	627.78	768.955	764.789	736.815	752.331	1044.97
chr8	122858019	122858519	240.821	0.0108417	0.111998	0.0968027	0.922883	0.970635	FALSE	FALSE	inactive	'1-2	237	249	339	166	263	319	472	225.367	255.42	249.929	232.093	241.323	235.288	262.632
chr8	124552369	124552869	1592.19	-0.22382	0.0775352	-2.88669	0.00389317	0.0319382	TRUE	TRUE	not-induced	'1-2	2178	1710	2637	1234	2146	2233	2505	2071.09	1754.09	1944.14	1725.32	1969.12	1647.02	1393.84
chr8	124644697	124645185	137.944	-0.233273	0.173255	-1.34641	0.178169	0.503486	FALSE	FALSE	inactive	'1-2	151	143	190	76	150	143	293	143.588	146.687	140.078	106.26	137.637	105.474	163.032
chr8	125598244	125598744	1081.99	-0.145511	0.113047	-1.28717	0.198036	0.529195	FALSE	FALSE	inactive	'1-2	1544	1200	1781	855	1347	1633	3877	1468.21	1230.94	1313.05	1195.42	1235.98	1204.47	2157.26
chr8	126442047	126443956	7876.31	-0.193596	0.145722	-1.32853	0.184004	0.512217	TRUE	TRUE	not-induced	'1-2	12563	9870	17114	7701	15092	17209	8366	11946.3	10124.5	12617.4	10767.2	13848.1	12693	4655.05
chr8	126578222	126578722	356.171	-0.113063	0.118848	-0.951328	0.341438	0.672155	FALSE	FALSE	inactive	'1-2	437	384	512	235	391	462	904	415.549	393.901	377.474	328.566	358.773	340.762	503.008
chr8	127621730	127621995	64.7155	-0.100835	0.216397	-0.465974	0.641234	0.849061	FALSE	FALSE	inactive	'1-2	55	58	57	32	74	62	146	52.3002	59.4955	42.0234	44.7408	67.9007	45.7299	81.238
chr8	128310401	128310901	141.891	-0.0572961	0.138388	-0.414024	0.678857	0.868167	FALSE	FALSE	inactive	'1-2	178	147	199	111	145	175	303	169.263	150.79	146.713	155.195	133.049	129.076	168.597
chr8	128323811	128324311	26.4704	0.335812	0.420892	0.797857	0.424953	0.732193	TRUE	TRUE	not-induced	'1-2	35	11	25	19	17	61	19	33.282	11.2836	18.4313	26.5649	15.5988	44.9923	10.5721
chr8	128794722	128795261	147.431	-0.169725	0.153916	-1.10271	0.270151	0.607258	TRUE	TRUE	not-induced	'1-2	225	224	380	150	228	257	253	213.956	229.776	280.156	209.723	209.208	189.558	140.775
chr8	129176626	129177376	317.98	0.00460129	0.122866	0.0374498	0.970126	0.990318	FALSE	FALSE	inactive	'1-2	351	348	481	231	317	414	927	333.771	356.973	354.619	322.973	290.872	305.358	515.805
chr8	133507906	133508406	139.538	-0.308954	0.176553	-1.74992	0.0801322	0.330968	FALSE	FALSE	inactive	'1-2	113	71	144	79	129	119	674	107.453	72.8307	106.164	110.454	118.367	87.772	375.03
chr8	133724160	133724660	266.548	-0.0698101	0.137378	-0.508162	0.61134	0.835077	TRUE	TRUE	not-induced	'1-2	513	373	475	296	534	628	344	487.819	382.618	350.195	413.853	489.986	463.2	191.41
chr8	134947614	134948114	59.5714	-0.18453	0.21573	-0.855376	0.392343	0.712491	TRUE	FALSE	not-induced	'1-2	69	71	74	31	88	78	109	65.613	72.8307	54.5567	43.3427	80.7468	57.5312	60.6503
chr8	135037476	135038905	205.746	-0.156122	0.14682	-1.06335	0.287621	0.625187	FALSE	FALSE	inactive	'1-2	274	233	402	158	228	310	636	260.55	239.008	296.376	220.908	209.208	228.65	353.886
chr8	135472881	135473381	18.6714	-1.97833	0.759842	-2.60361	0.00922471	0.0675739	FALSE	FALSE	inactive	'1-2	11	2	6	2	14	3	193	10.46	2.05157	4.42352	2.7963	12.8461	2.21274	107.39
chr8	135588522	135589022	181.005	-0.245206	0.146605	-1.67256	0.0944131	0.364376	FALSE	FALSE	inactive	'1-2	165	123	243	81	159	219	386	156.901	126.172	179.153	113.25	145.895	161.53	214.78
chr8	135904641	135905837	624.687	-0.106928	0.173854	-0.615045	0.538525	0.800165	FALSE	FALSE	inactive	'1-2	512	455	555	293	523	543	1043	486.868	466.732	409.176	409.658	479.893	400.506	580.351
chr8	138888495	138888995	16.936	0.457941	0.413188	1.10831	0.267728	0.604299	FALSE	FALSE	inactive	'1-2	20	15	13	15	16	30	66	19.0183	15.3868	9.58429	20.9723	14.6812	22.1274	36.724
chr8	139684558	139685490	576.901	-0.174403	0.0836784	-2.0842	0.0371418	0.201552	FALSE	FALSE	inactive	'1-2	523	395	602	301	527	586	1238	497.328	405.185	443.826	420.844	483.563	432.222	688.853
chr8	140724894	140725394	1626.73	-0.107969	0.104755	-1.03068	0.302692	0.639401	FALSE	FALSE	inactive	'1-2	2230	1642	2493	1298	1920	2451	4208	2120.54	1684.34	1837.97	1814.8	1761.75	1807.81	2341.43
chr8	140752819	140753319	4465.41	-0.207378	0.107995	-1.92027	0.0548243	0.264218	TRUE	TRUE	not-induced	'1-2	4663	3551	5282	2433	4274	4830	5797	4434.11	3642.56	3894.17	3401.7	3921.73	3562.51	3225.59
chr8	141332164	141332664	500.889	-0.211656	0.0949346	-2.22949	0.0257813	0.155057	FALSE	FALSE	inactive	'1-2	730	521	831	420	699	761	1239	694.167	534.434	612.657	587.224	641.387	561.298	689.41
chr8	141578389	141578889	1741.43	-0.0820856	0.0738253	-1.11189	0.266185	0.602334	TRUE	FALSE	not-induced	'1-2	1896	1637	2329	1141	1877	2268	3020	1802.93	1679.21	1717.06	1595.29	1722.29	1672.83	1680.4
chr8	142240663	142241150	6655.43	-0.0282691	0.118497	-0.238564	0.811444	0.924971	TRUE	TRUE	not-induced	'1-2	4269	3675	5512	2963	3784	4697	3455	4059.45	3769.76	4063.74	4142.72	3472.11	3464.41	1922.45
chr8	142316010	142316510	385.603	-0.0289605	0.107226	-0.27009	0.787091	0.916201	FALSE	FALSE	inactive	'1-2	403	365	503	254	428	529	888	383.218	374.411	370.838	355.13	392.723	390.18	494.105
chr8	143438719	143439219	3167.7	-0.154826	0.127254	-1.21667	0.223729	0.558721	FALSE	FALSE	inactive	'1-2	4245	3223	5058	2471	3669	4393	6961	4036.63	3306.1	3729.03	3454.83	3366.59	3240.19	3873.27
chr8	145550033	145550496	1585.73	0.345809	0.345682	1.00037	0.317133	0.652243	FALSE	FALSE	inactive	'1-2	704	1496	1716	528	1027	1874	2713	669.443	1534.57	1265.13	738.224	942.352	1382.22	1509.58
chr9	708409	708909	181.158	-0.0947961	0.141848	-0.668295	0.503946	0.781631	FALSE	FALSE	inactive	'1-2	204	187	231	135	219	206	377	193.986	191.822	170.306	188.75	200.949	151.941	209.772
chr9	792361	792861	1105.14	0.0832498	0.0891403	0.933919	0.350346	0.679592	TRUE	TRUE	not-induced	'1-2	929	920	1150	644	984	1278	1487	883.399	943.722	847.841	900.41	902.896	942.627	827.403
chr9	3793840	3794892	515.359	-0.0430077	0.0924296	-0.465302	0.641715	0.849068	FALSE	FALSE	inactive	'1-2	492	460	723	340	526	669	1019	467.849	471.861	533.034	475.372	482.646	493.441	566.997
chr9	3903203	3903724	154.857	-0.0735714	0.143022	-0.514404	0.606969	0.833083	FALSE	FALSE	inactive	'1-2	174	176	227	112	184	192	340	165.459	180.538	167.356	156.593	168.834	141.615	189.184
chr9	4985883	4986383	182.043	0.119849	0.127566	0.93951	0.347469	0.677055	FALSE	FALSE	inactive	'1-2	201	194	256	146	247	338	432	191.134	199.002	188.737	204.13	226.642	249.302	240.375
chr9	13064090	13064590	103.588	-0.199292	0.161371	-1.23499	0.216833	0.550841	FALSE	FALSE	inactive	'1-2	112	86	132	67	100	106	318	106.502	88.2175	97.3174	93.6761	91.7577	78.1834	176.943
chr9	13083312	13084699	148.46	-0.0767951	0.163317	-0.470222	0.638196	0.847995	FALSE	FALSE	inactive	'1-2	143	146	202	99	150	157	439	135.981	149.765	148.925	138.417	137.637	115.8	244.27
chr9	16368358	16368858	543.8	-0.0966316	0.0955375	-1.01145	0.3118	0.647463	TRUE	TRUE	not-induced	'1-2	841	790	1046	549	879	884	1112	799.718	810.37	771.167	767.585	806.551	652.02	618.744
chr9	16726583	16727083	589.962	-0.0341038	0.115367	-0.295612	0.767526	0.906788	TRUE	TRUE	not-induced	'1-2	621	586	899	372	655	925	752	590.517	601.11	662.791	520.112	601.013	682.261	418.431
chr9	21450908	21451266	368.777	0.502738	0.179576	2.79958	0.00511687	0.0404456	TRUE	TRUE	not-induced	'1-2	194	327	285	189	228	348	232	184.477	335.432	210.117	264.251	209.208	256.678	129.09
chr9	27689115	27689615	212.296	-0.0373318	0.15191	-0.245749	0.805876	0.922482	TRUE	TRUE	not-induced	'1-2	244	205	224	137	242	269	292	232.023	210.286	165.145	191.547	222.054	198.409	162.476
chr9	31045771	31046271	182.465	-0.295329	0.145288	-2.03272	0.042081	0.220813	TRUE	TRUE	not-induced	'1-2	554	392	597	314	516	457	33	526.806	402.108	440.14	439.02	473.47	337.074	18.362
chr9	33156883	33157383	149.648	-0.162857	0.188467	-0.864112	0.387526	0.708291	FALSE	FALSE	inactive	'1-2	132	93	213	110	126	152	610	125.521	95.398	157.035	153.797	115.615	112.112	339.419
chr9	34021242	34021742	113.269	0.127471	0.176777	0.721086	0.470856	0.760366	FALSE	FALSE	inactive	'1-2	107	109	166	104	115	147	332	101.748	111.811	122.384	145.408	105.521	108.424	184.733
chr9	34899665	34900165	312.891	-0.232848	0.107026	-2.17563	0.0295829	0.171119	FALSE	FALSE	inactive	'1-2	428	308	560	263	416	464	1097	406.991	315.942	412.862	367.714	381.712	342.237	610.398
chr9	35520944	35521444	98.9068	-0.0121309	0.186826	-0.0649313	0.948229	0.981662	FALSE	FALSE	inactive	'1-2	107	77	101	56	97	137	350	101.748	78.9854	74.4626	78.2965	89.005	101.048	194.749
chr9	35814657	35815795	13647.6	-0.0666077	0.117355	-0.567572	0.570325	0.815307	TRUE	TRUE	not-induced	'1-2	5739	4898	7622	3894	6642	8033	5648	5457.29	5024.29	5619.34	5444.4	6094.55	5924.98	3142.69
chr9	68360253	68360753	55.4284	0.097111	0.234212	0.414628	0.678414	0.867833	FALSE	FALSE	inactive	'1-2	55	42	68	51	52	67	171	52.3002	43.083	50.1332	71.3057	47.714	49.4178	95.1486
chr9	74929766	74931269	619.345	-0.0744626	0.0964297	-0.772196	0.439998	0.740965	FALSE	FALSE	inactive	'1-2	679	616	836	445	769	832	1454	645.67	631.883	616.344	622.177	705.617	613.666	809.041
chr9	75179208	75179708	26.1324	-0.13819	0.46957	-0.29429	0.768536	0.907198	FALSE	FALSE	inactive	'1-2	27	6	31	18	34	54	57	25.6747	6.15471	22.8549	25.1667	31.1976	39.8293	31.7162
chr9	75723989	75724489	224.45	-0.189041	0.138317	-1.36672	0.171712	0.492665	FALSE	FALSE	inactive	'1-2	182	160	287	116	195	229	345	173.066	164.126	211.592	162.186	178.928	168.906	191.966
chr9	82379324	82379824	632.243	-0.185731	0.133445	-1.39182	0.163977	0.480374	TRUE	TRUE	not-induced	'1-2	1125	803	1414	753	1346	1445	759	1069.78	823.705	1042.48	1052.81	1235.06	1065.8	422.326
chr9	82592633	82593133	121.018	-0.0476492	0.16419	-0.290208	0.771657	0.908591	FALSE	FALSE	inactive	'1-2	151	127	179	103	144	166	297	143.588	130.275	131.968	144.01	132.131	122.438	165.258
chr9	84177686	84177970	241.172	-0.091008	0.138168	-0.658676	0.510104	0.785412	FALSE	FALSE	inactive	'1-2	314	278	330	156	307	358	547	298.587	285.168	243.294	218.112	281.696	264.053	304.364
chr9	84332022	84333215	158.974	-0.0300806	0.125962	-0.238807	0.811256	0.924971	FALSE	FALSE	inactive	'1-2	207	191	245	113	182	239	416	196.839	195.925	180.627	157.991	166.999	176.282	231.473
chr9	85677732	85678024	2468.43	0.0203976	0.163217	0.124972	0.900545	0.963537	TRUE	TRUE	not-induced	'1-2	2060	1920	3224	1628	2170	2947	1714	1958.88	1969.51	2376.9	2276.19	1991.14	2173.65	953.712
chr9	87062053	87062724	576.13	0.0501174	0.0857358	0.584556	0.558846	0.81044	FALSE	FALSE	inactive	'1-2	497	457	619	364	540	674	1489	472.604	468.784	456.36	508.927	495.492	497.129	828.516
chr9	87873608	87874108	478.896	-0.201553	0.121789	-1.65494	0.097937	0.371459	TRUE	FALSE	not-induced	'1-2	635	505	824	429	741	719	1068	603.83	518.021	607.497	599.807	679.925	530.32	594.261
chr9	88196008	88196508	158.515	-0.0414249	0.139352	-0.297268	0.766262	0.905819	FALSE	FALSE	inactive	'1-2	187	187	246	102	162	214	425	177.821	191.822	181.364	142.611	148.648	157.842	236.48
chr9	90319391	90319891	360.513	-0.166723	0.0935952	-1.78132	0.0748604	0.316882	FALSE	FALSE	inactive	'1-2	409	328	559	259	419	487	786	388.924	336.457	412.125	362.121	384.465	359.201	437.35
chr9	91203857	91204357	276.064	0.0804049	0.131091	0.613352	0.539643	0.800535	FALSE	FALSE	inactive	'1-2	245	255	354	165	288	411	567	232.974	261.575	260.988	230.695	264.262	303.145	315.493
chr9	91434869	91435369	374.256	-0.0131283	0.120057	-0.109351	0.912924	0.966454	FALSE	FALSE	inactive	'1-2	355	320	379	199	351	431	868	337.574	328.251	279.419	278.232	322.07	317.897	482.976
chr9	92246199	92246699	562.994	-0.174173	0.0833754	-2.08902	0.0367062	0.199947	FALSE	FALSE	inactive	'1-2	716	602	858	390	728	796	1263	680.854	617.522	632.563	545.279	667.996	587.113	702.764
chr9	92250294	92250794	806.683	-0.257313	0.0830398	-3.09868	0.00194387	0.0172428	FALSE	FALSE	inactive	'1-2	1103	771	1275	577	1033	1158	1820	1048.86	790.88	939.998	806.733	947.857	854.117	1012.69
chr9	93351448	93351948	233.874	-0.0535129	0.150051	-0.356631	0.721368	0.886536	FALSE	FALSE	inactive	'1-2	347	319	390	197	328	381	736	329.967	327.225	287.529	275.436	300.965	281.018	409.528
chr9	94292712	94293212	255.317	0.0350664	0.132178	0.265298	0.79078	0.917614	FALSE	FALSE	inactive	'1-2	258	296	380	186	316	368	694	245.336	303.632	280.156	260.056	289.954	271.429	386.159
chr9	94668309	94668809	699.414	-0.135939	0.0852035	-1.59547	0.110608	0.395214	TRUE	TRUE	not-induced	'1-2	1202	933	1368	756	1139	1224	1096	1143	957.057	1008.56	1057	1045.12	902.797	609.841
chr9	96285958	96286458	581.731	-0.0889285	0.153382	-0.579783	0.562061	0.812055	FALSE	FALSE	inactive	'1-2	490	453	643	294	489	582	992	465.948	464.68	474.054	411.057	448.695	429.271	551.973
chr9	96928745	96929178	12746.4	0.339759	0.498143	0.682052	0.495206	0.7754	TRUE	TRUE	not-induced	'1-2	3490	5675	7591	3268	5664	10126	2206	3318.69	5821.33	5596.49	4569.16	5197.16	7468.73	1227.47
chr9	97505883	97506266	1045.18	-0.0938076	0.103076	-0.910079	0.362781	0.688989	FALSE	FALSE	inactive	'1-2	1449	1116	1727	886	1345	1703	2872	1377.87	1144.78	1273.24	1238.76	1234.14	1256.1	1598.05
chr9	97700015	97700515	4744.66	-0.277008	0.22533	-1.22934	0.218943	0.55302	TRUE	TRUE	not-induced	'1-2	3051	2189	3874	1745	3458	3639	2856	2901.24	2245.44	2856.12	2439.77	3172.98	2684.05	1589.15
chr9	100639382	100639882	393.639	0.0820947	0.118321	0.693829	0.48779	0.770793	TRUE	TRUE	not-induced	'1-2	518	497	591	325	458	626	681	492.573	509.815	435.717	454.399	420.25	461.725	378.925
chr9	100964625	100965125	934.336	-0.137501	0.0969168	-1.41875	0.155971	0.470287	TRUE	TRUE	not-induced	'1-2	1168	970	1393	697	1257	1381	1684	1110.67	995.011	1026.99	974.512	1153.39	1018.6	937.019
chr9	105093488	105093988	48.3584	-0.248469	0.229227	-1.08394	0.278391	0.617075	FALSE	FALSE	inactive	'1-2	63	64	75	34	61	45	122	59.9076	65.6502	55.294	47.5372	55.9722	33.1911	67.8838
chr9	108716353	108716767	371.147	1.68138	0.221839	7.57928	3.47479e-14	8.6561e-13	TRUE	TRUE	induced	'1-2	311	1006	352	701	335	1024	128	295.734	1031.94	259.513	980.104	307.388	755.281	71.2223
chr9	108831433	108831933	356.587	-0.0584412	0.119116	-0.490625	0.623692	0.841126	FALSE	FALSE	inactive	'1-2	334	311	506	252	380	448	919	317.605	319.019	373.05	352.334	348.679	330.436	511.354
chr9	110893225	110894758	622.79	-0.0726421	0.128583	-0.564944	0.572112	0.81589	TRUE	TRUE	not-induced	'1-2	636	474	620	374	580	685	814	604.781	486.222	457.097	522.909	532.195	505.242	452.93
chr9	114780219	114780719	228.173	-0.088028	0.141476	-0.622212	0.533803	0.796748	FALSE	FALSE	inactive	'1-2	313	254	325	166	235	293	478	297.636	260.549	239.607	232.093	215.631	216.111	265.971
chr9	116072907	116073407	404.274	-0.137814	0.132806	-1.03771	0.299404	0.636701	FALSE	FALSE	inactive	'1-2	386	334	620	254	397	519	865	367.053	342.612	457.097	355.13	364.278	382.804	481.307
chr9	116247708	116248208	728.426	-0.150444	0.1009	-1.49103	0.135955	0.440819	FALSE	FALSE	inactive	'1-2	967	777	1308	596	1068	1281	1939	919.533	797.035	964.327	833.298	979.973	944.839	1078.91
chr9	118912417	118913016	307.937	1.16642	0.179495	6.49834	8.12106e-11	1.52593e-09	FALSE	TRUE	induced	'1-2	236	559	285	386	260	543	471	224.416	573.414	210.117	539.686	238.57	400.506	262.076
chr9	118971502	118972002	810.217	-0.0904745	0.181272	-0.49911	0.617702	0.838306	FALSE	FALSE	inactive	'1-2	462	424	578	272	441	512	922	439.322	434.933	426.132	380.297	404.652	377.641	513.023
chr9	119239227	119240078	1963.48	0.0714668	0.144861	0.493348	0.621767	0.840239	FALSE	FALSE	inactive	'1-2	2147	1986	2590	1423	1998	2780	6447	2041.61	2037.21	1909.49	1989.57	1833.32	2050.47	3587.27
chr9	119253683	119254183	46.1727	0.0989908	0.251366	0.393812	0.69372	0.87318	FALSE	FALSE	inactive	'1-2	64	56	55	32	33	53	151	60.8585	57.4439	40.5489	44.7408	30.2801	39.0917	84.0201
chr9	122581971	122582471	187.533	0.0865681	0.136533	0.634045	0.526052	0.793265	FALSE	FALSE	inactive	'1-2	262	206	286	182	229	333	772	249.139	211.312	210.854	254.464	210.125	245.614	429.56
chr9	123456716	123457136	70.1228	-0.029702	0.290873	-0.102113	0.918667	0.968661	FALSE	FALSE	inactive	'1-2	46	80	72	48	99	50	123	43.742	82.0628	53.0822	67.1113	90.8402	36.879	68.4402
chr9	124407341	124408417	1764.68	0.24669	0.0797186	3.09451	0.0019714	0.0174471	TRUE	TRUE	not-induced	'1-2	1517	1697	2100	1245	1588	2435	2400	1442.54	1740.76	1548.23	1740.7	1457.11	1796.01	1335.42
chr9	126840320	126841357	930.525	-0.0835722	0.116894	-0.714942	0.474645	0.762014	TRUE	TRUE	not-induced	'1-2	927	805	1215	648	1096	1213	1359	881.497	825.757	895.763	906.002	1005.66	894.684	756.181
chr9	127437549	127438049	154.781	-0.233155	0.159572	-1.46113	0.14398	0.453921	FALSE	FALSE	inactive	'1-2	185	127	205	117	193	186	418	175.919	130.275	151.137	163.584	177.092	137.19	232.585
chr9	128934508	128935008	4346	-0.272275	0.22267	-1.22277	0.221416	0.556013	TRUE	TRUE	not-induced	'1-2	9952	4898	7530	4541	11625	13403	2535	9463.49	5024.29	5551.52	6349.01	10666.8	9885.78	1410.54
chr9	129514608	129515108	826.942	-0.115679	0.110925	-1.04285	0.297016	0.634264	FALSE	FALSE	inactive	'1-2	1127	941	1334	729	1203	1265	2116	1071.68	965.263	983.496	1019.25	1103.85	933.038	1177.39
chr9	133605537	133606037	2207.03	-0.193693	0.154631	-1.25262	0.210346	0.543677	TRUE	TRUE	not-induced	'1-2	4449	3219	5009	2471	5674	6394	3830	4230.61	3302	3692.9	3454.83	5206.33	4716.08	2131.11
chr9	136001559	136001834	513.149	-0.0330292	0.0923045	-0.357829	0.720471	0.886058	FALSE	FALSE	inactive	'1-2	488	492	629	295	522	614	896	464.046	504.686	463.732	412.455	478.975	452.874	498.556
chr9	137584936	137585255	519.621	0.00878828	0.112707	0.0779744	0.937848	0.977366	TRUE	TRUE	not-induced	'1-2	269	243	344	190	298	368	455	255.796	249.266	253.615	265.649	273.438	271.429	253.173
chr9	138110340	138110840	1254.81	-0.138419	0.075854	-1.8248	0.0680308	0.301168	TRUE	TRUE	not-induced	'1-2	1700	1415	2003	966	1684	1907	2119	1616.55	1451.49	1476.72	1350.61	1545.2	1406.56	1179.06
chr9	138881683	138882183	4295.2	-0.125777	0.0819853	-1.53414	0.124996	0.423634	TRUE	TRUE	not-induced	'1-2	3051	2689	4162	1972	3420	3838	3942	2901.24	2758.34	3068.45	2757.15	3138.11	2830.83	2193.43
chr9	140408252	140409451	144272	1.56686	0.125509	12.484	9.1231e-36	1.35887e-33	TRUE	TRUE	induced	'1-2	74074	187396	89133	165597	69967	230227	106684	70438	192228	65713.6	231530	64200.1	169811	59361.6
chrX	4794277	4794777	33.6712	0.161044	0.260033	0.619322	0.535705	0.79818	FALSE	FALSE	inactive	'1-2	32	23	39	28	36	54	98	30.4292	23.593	28.7529	39.1482	33.0328	39.8293	54.5296
chrX	9052532	9053032	166.798	-0.0263235	0.129959	-0.202552	0.839485	0.937211	FALSE	FALSE	inactive	'1-2	174	163	204	122	178	186	485	165.459	167.203	150.4	170.574	163.329	137.19	269.866
chrX	11404351	11404851	617.607	-0.149434	0.103466	-1.44427	0.148662	0.460629	FALSE	FALSE	inactive	'1-2	530	467	728	309	523	622	1340	503.984	479.041	536.72	432.029	479.893	458.774	745.609
chrX	13239020	13239520	289.272	0.0525008	0.125839	0.417208	0.676527	0.866574	FALSE	FALSE	inactive	'1-2	300	280	348	216	326	384	648	285.274	287.22	256.564	302.001	299.13	283.231	360.563
chrX	15328197	15328697	105.314	0.0556121	0.171757	0.323785	0.746101	0.897049	FALSE	FALSE	inactive	'1-2	105	108	141	59	103	153	227	99.8459	110.785	103.953	82.4909	94.5105	112.85	126.308
chrX	16684172	16684672	270.877	-0.110487	0.127241	-0.86833	0.385214	0.706629	FALSE	FALSE	inactive	'1-2	311	277	379	161	290	360	767	295.734	284.142	279.419	225.102	266.097	265.529	426.778
chrX	21295167	21295667	878.16	-0.0236513	0.0845891	-0.279602	0.779783	0.911776	FALSE	FALSE	inactive	'1-2	1159	1025	1512	732	1062	1442	2251	1102.11	1051.43	1114.73	1023.45	974.467	1063.59	1252.51
chrX	21959193	21959693	302.732	0.00894174	0.278773	0.0320754	0.974412	0.991954	FALSE	FALSE	inactive	'1-2	210	258	406	137	319	458	756	199.692	264.652	299.325	191.547	292.707	337.811	420.657
chrX	23362226	23362726	77.7169	-0.0831059	0.184468	-0.450515	0.652339	0.854574	FALSE	FALSE	inactive	'1-2	111	80	112	66	96	117	217	105.551	82.0628	82.5724	92.278	88.0874	86.2968	120.744
chrX	39242260	39243908	400.178	-0.0751596	0.118109	-0.63636	0.524542	0.793193	FALSE	FALSE	inactive	'1-2	399	382	512	221	452	546	812	379.415	391.85	377.474	308.991	414.745	402.718	451.817
chrX	39964432	39964932	8503.5	-0.0428935	0.2005	-0.213932	0.8306	0.932942	TRUE	TRUE	not-induced	'1-2	4416	4188	6249	2707	4519	6089	4319	4199.23	4295.99	4607.1	3784.8	4146.53	4491.12	2403.2
chrX	40034643	40035143	7745.76	-0.0755737	0.0915144	-0.825811	0.408911	0.723632	TRUE	TRUE	not-induced	'1-2	3946	3260	5200	2659	3960	4865	3382	3752.3	3344.06	3833.72	3717.68	3633.61	3588.32	1881.83
chrX	44733118	44733618	7983.17	-0.101727	0.109667	-0.927599	0.353615	0.68225	TRUE	TRUE	not-induced	'1-2	4815	3807	6315	3224	5468	6597	2645	4578.65	3905.16	4655.75	4507.64	5017.31	4865.81	1471.74
chrX	45754653	45755153	81.4767	-0.241875	0.206022	-1.17402	0.240386	0.576199	FALSE	FALSE	inactive	'1-2	110	69	143	57	82	122	252	104.6	70.7791	105.427	79.6946	75.2413	89.9847	140.219
chrX	68500752	68501252	438	-0.137341	0.126007	-1.08995	0.275734	0.614514	FALSE	FALSE	inactive	'1-2	419	353	599	321	462	470	1160	398.433	362.102	441.615	448.807	423.921	346.662	645.452
chrX	79564797	79565297	82.6769	-0.191403	0.219705	-0.871186	0.383653	0.705947	FALSE	FALSE	inactive	'1-2	78	86	122	59	100	77	209	74.1713	88.2175	89.9449	82.4909	91.7577	56.7936	116.293
chrX	94364285	94364785	722.47	-0.0594715	0.0763799	-0.778627	0.436199	0.738063	TRUE	FALSE	not-induced	'1-2	846	750	1115	533	906	1133	1435	804.473	769.339	822.037	745.215	831.325	835.678	798.469
chrX	96563127	96563627	148.1	-0.475101	0.200083	-2.37452	0.0175716	0.114303	FALSE	FALSE	inactive	'1-2	166	76	211	95	185	185	488	157.852	77.9596	155.56	132.824	169.752	136.452	271.535
chrX	98623048	98623548	52.6895	-0.459668	0.246367	-1.86578	0.062072	0.28475	TRUE	FALSE	not-induced	'1-2	68	30	100	38	55	73	91	64.6621	30.7735	73.7253	53.1298	50.4668	53.8433	50.6346
chrX	113749762	113750262	93.321	-0.069965	0.200888	-0.34828	0.72763	0.889272	FALSE	FALSE	inactive	'1-2	108	93	122	64	76	92	268	102.699	95.398	89.9449	89.4817	69.7359	67.8573	149.122
chrX	118628471	118628971	120.778	-0.057432	0.144996	-0.396093	0.692037	0.872441	FALSE	FALSE	inactive	'1-2	130	117	166	82	108	136	280	123.619	120.017	122.384	114.648	99.0984	100.311	155.799
chrX	126316713	126317213	7.16091	0.647906	0.5393	1.20138	0.229602	0.565775	FALSE	FALSE	inactive	'1-2	6	12	6	3	8	13	28	5.70548	12.3094	4.42352	4.19445	7.34062	9.58853	15.5799
chrX	134714352	134714852	106.203	0.154131	0.18952	0.813273	0.416062	0.728021	FALSE	FALSE	inactive	'1-2	71	97	119	53	85	116	291	67.5149	99.5011	87.7331	74.102	77.9941	85.5592	161.92
chrX	141338326	141338826	1544.39	0.0297819	0.166921	0.178419	0.858394	0.946315	TRUE	TRUE	not-induced	'1-2	3475	2979	4610	2639	2452	3257	1057	3304.42	3055.81	3398.74	3689.72	2249.9	2402.3	588.141
chrX	141720162	141720662	549.526	-0.02983	0.0953195	-0.312948	0.75432	0.900614	FALSE	FALSE	inactive	'1-2	700	640	862	413	641	832	1347	665.639	656.502	635.512	577.437	588.167	613.666	749.504
chrX	151295722	151296222	148.074	0.138276	0.167856	0.823776	0.410067	0.724073	FALSE	FALSE	inactive	'1-2	186	142	167	100	143	248	410	176.87	145.661	123.121	139.815	131.214	182.92	228.134
chr1	875461	877284	11425.7	-0.0680865	0.095307	-0.714391	0.474985	0.762354	TRUE	TRUE	not-induced	'3-4	11257	9160	13833	7080	10744	13622	14069	10704.4	9396.19	10198.4	9898.91	9858.45	10047.3	7828.34
chr1	1051229	1051638	1109.94	0.0785732	0.11004	0.714039	0.475203	0.762527	TRUE	TRUE	not-induced	'3-4	654	783	1032	555	900	1024	1110	621.897	803.189	760.845	775.974	825.82	755.281	617.631
chr1	1684722	1685222	4504.42	-0.121994	0.106955	-1.1406	0.254035	0.590738	TRUE	TRUE	not-induced	'3-4	5082	4030	6311	3215	5141	5996	6339	4832.54	4133.91	4652.81	4495.06	4717.27	4422.53	3527.17
chr1	1823810	1824310	2469.75	-0.0885284	0.0991831	-0.892575	0.372085	0.697762	FALSE	FALSE	inactive	'3-4	2904	2264	3129	1681	2546	3105	7768	2761.45	2322.38	2306.87	2350.29	2336.15	2290.18	4322.31
chr1	1839986	1840486	7900.7	-0.152562	0.132884	-1.14808	0.250936	0.588223	TRUE	TRUE	not-induced	'3-4	8039	6464	10859	4758	7661	9653	5929	7644.39	6630.67	8005.83	6652.4	7029.56	7119.85	3299.04
chr1	2070309	2071018	634.16	0.0525733	0.129227	0.40683	0.684133	0.87009	TRUE	TRUE	not-induced	'3-4	651	606	781	413	613	842	1009	619.045	621.626	575.795	577.437	562.475	621.042	561.432
chr1	2466347	2466847	2607.12	-0.074464	0.136775	-0.544427	0.586148	0.822674	TRUE	TRUE	not-induced	'3-4	3405	2948	4607	2306	4608	5507	4215	3237.86	3024.01	3396.53	3224.14	4228.2	4061.85	2345.33
chr1	2524120	2524620	7628.8	-0.102003	0.104689	-0.974349	0.329883	0.662598	TRUE	TRUE	not-induced	'3-4	4996	4151	6639	3267	4980	5994	5266	4750.76	4258.03	4894.62	4567.76	4569.54	4421.05	2930.13
chr1	6086070	6086570	9791.84	-0.181831	0.115946	-1.56824	0.116825	0.40803	TRUE	TRUE	not-induced	'3-4	10696	7995	13167	6535	11373	12724	5654	10171	8201.15	9707.41	9136.92	10435.6	9384.96	3146.02
chr1	8747039	8747539	713.086	0.0614979	0.098605	0.62368	0.532838	0.796277	FALSE	FALSE	inactive	'3-4	737	650	840	494	686	917	1384	700.823	666.76	619.293	690.687	629.458	676.36	770.091
chr1	8765165	8765665	436.535	-0.14437	0.110716	-1.30397	0.192243	0.522899	FALSE	FALSE	inactive	'3-4	510	403	660	305	480	593	967	484.966	413.391	486.587	426.436	440.437	437.385	538.062
chr1	8933611	8934111	948.34	-0.136885	0.178211	-0.768103	0.442426	0.742605	TRUE	TRUE	not-induced	'3-4	991	830	1457	759	1650	1756	411	942.355	851.401	1074.18	1061.2	1514	1295.19	228.69
chr1	9222816	9224446	5735.83	-0.268748	0.197998	-1.35733	0.174678	0.497769	TRUE	TRUE	not-induced	'3-4	7741	5393	9513	4340	10378	11160	2811	7361.02	5532.06	7013.49	6067.98	9522.62	8231.39	1564.11
chr1	9498042	9499333	1637.51	-0.0436437	0.0592312	-0.736837	0.461221	0.754597	TRUE	TRUE	not-induced	'3-4	1784	1544	2211	1165	1839	2235	2419	1696.43	1583.81	1630.07	1628.85	1687.42	1648.49	1345.99
chr1	10735081	10735976	5097.76	-0.0778556	0.0965757	-0.806162	0.420149	0.730061	TRUE	TRUE	not-induced	'3-4	2569	2319	3545	1743	2960	3453	3787	2442.9	2378.79	2613.56	2436.98	2716.03	2546.86	2107.18
chr1	10815986	10816486	4051.12	-0.0904898	0.124324	-0.727856	0.466701	0.757979	TRUE	TRUE	not-induced	'3-4	3327	2868	3916	1951	3271	3837	4889	3163.69	2941.95	2887.08	2727.79	3001.4	2830.09	2720.36
chr1	11327766	11328058	353.319	0.0956967	0.155604	0.615001	0.538554	0.800165	FALSE	FALSE	inactive	'3-4	431	453	468	261	491	614	933	409.844	464.68	345.035	364.918	450.53	452.874	519.144
chr1	11863722	11864150	669.513	-0.150219	0.116702	-1.2872	0.198024	0.529195	FALSE	FALSE	inactive	'3-4	959	732	1081	559	897	1016	1617	911.926	750.874	796.971	781.567	823.067	749.381	899.738
chr1	12280876	12281376	320.439	0.225559	0.12578	1.79328	0.0729277	0.312153	FALSE	FALSE	inactive	'3-4	293	384	371	241	369	422	646	278.618	393.901	273.521	336.955	338.586	311.259	359.45
chr1	15068486	15068986	755.854	-0.0496768	0.242195	-0.205111	0.837485	0.936166	TRUE	TRUE	not-induced	'3-4	528	484	744	379	708	834	700	502.082	496.48	548.516	529.899	649.645	615.141	389.497
chr1	16394977	16395477	884.259	-0.130272	0.0980683	-1.32838	0.184053	0.512217	FALSE	FALSE	inactive	'3-4	812	698	993	474	798	900	1920	772.142	715.998	732.093	662.724	732.227	663.822	1068.33
chr1	16447444	16447814	391.049	-0.136266	0.121316	-1.12323	0.26134	0.59915	FALSE	FALSE	inactive	'3-4	390	339	521	245	462	514	1251	370.856	347.741	384.109	342.547	423.921	379.116	696.087
chr1	17755000	17755469	163.302	-0.0798285	0.202047	-0.3951	0.692769	0.87312	TRUE	TRUE	not-induced	'3-4	176	160	206	108	188	203	241	167.361	164.126	151.874	151	172.505	149.729	134.098
chr1	19777234	19777734	644.515	-0.177167	0.106444	-1.66442	0.0960289	0.367242	TRUE	FALSE	not-induced	'3-4	878	618	1018	471	885	1109	1301	834.902	633.935	750.524	658.529	812.056	817.976	723.908
chr1	20204518	20205018	65.242	0.179037	0.230056	0.778231	0.436433	0.738265	FALSE	FALSE	inactive	'3-4	93	75	71	65	75	95	204	88.435	76.9339	52.345	90.8798	68.8183	70.0701	113.511
chr1	20860040	20860539	828.707	-0.1968	0.100574	-1.95676	0.0503761	0.248475	FALSE	FALSE	inactive	'3-4	889	717	1202	482	773	975	2336	845.362	735.488	886.178	673.909	709.287	719.14	1299.81
chr1	21658286	21658786	476.065	0.00266384	0.100894	0.0264024	0.978936	0.993598	FALSE	FALSE	inactive	'3-4	500	429	614	330	435	585	1120	475.457	440.062	452.674	461.39	399.146	431.484	623.195
chr1	22612014	22612589	9901.19	0.111984	0.131627	0.850763	0.394901	0.714138	TRUE	TRUE	not-induced	'3-4	4948	4881	6162	3695	5138	6667	4329	4705.12	5006.86	4542.95	5166.17	4714.51	4917.44	2408.76
chr1	23177136	23177636	745.225	-0.160865	0.111321	-1.44506	0.148442	0.460364	FALSE	FALSE	inactive	'3-4	646	465	704	386	717	787	1507	614.29	476.99	519.026	539.686	657.903	580.475	838.532
chr1	23857403	23857902	2060.1	0.297286	0.0832032	3.57301	0.000352895	0.00362764	TRUE	TRUE	not-induced	'3-4	1621	1822	2158	1402	1697	2624	1684	1541.43	1868.98	1590.99	1960.21	1557.13	1935.41	937.019
chr1	24829819	24830319	353.227	0.0617692	0.119467	0.517039	0.605129	0.832151	FALSE	FALSE	inactive	'3-4	359	377	459	215	392	528	729	341.378	386.721	338.399	300.603	359.69	389.442	405.633
chr1	27337265	27337765	1978.43	-0.149429	0.158748	-0.941297	0.346553	0.676777	TRUE	TRUE	not-induced	'3-4	2101	1802	3058	1508	3039	3239	1599	1997.87	1848.46	2254.52	2108.41	2788.52	2389.02	889.723
chr1	31173734	31174062	1568.55	-0.103179	0.124861	-0.826347	0.408607	0.723512	TRUE	TRUE	not-induced	'3-4	2173	1717	2799	1376	2722	3358	2336	2066.34	1761.27	2063.57	1923.86	2497.65	2476.79	1299.81
chr1	31177086	31177586	1238.13	-0.168317	0.0938081	-1.79427	0.0727703	0.312153	FALSE	FALSE	inactive	'3-4	1217	977	1517	778	1278	1333	2295	1157.26	1002.19	1118.41	1087.76	1172.66	983.193	1276.99
chr1	34891941	34892441	881.173	-0.17667	0.0653905	-2.70176	0.00689735	0.0527629	FALSE	FALSE	inactive	'3-4	1147	920	1447	678	1213	1350	2072	1090.7	943.722	1066.81	947.947	1113.02	995.732	1152.91
chr1	35657472	35657972	30826.8	0.0844509	0.23042	0.366508	0.713986	0.88285	TRUE	TRUE	not-induced	'3-4	8386	8534	12834	6046	9621	14424	2692	7974.36	8754.05	9461.91	8453.22	8828.01	10638.8	1497.89
chr1	38397329	38397798	2394.16	-0.0815424	0.136261	-0.59843	0.549553	0.806892	FALSE	FALSE	inactive	'3-4	2633	2148	3267	1533	2559	3404	4358	2503.76	2203.39	2408.61	2143.37	2348.08	2510.72	2424.9
chr1	40490445	40490719	41.1475	-0.124935	0.292726	-0.4268	0.669525	0.863809	FALSE	FALSE	inactive	'3-4	43	36	51	43	66	45	129	40.8893	36.9282	37.5999	60.1205	60.5601	33.1911	71.7788
chr1	41381217	41381717	294.459	0.0709011	0.118554	0.598048	0.549808	0.806892	FALSE	FALSE	inactive	'3-4	271	276	353	177	285	385	516	257.698	283.117	260.25	247.473	261.51	283.968	287.115
chr1	43438812	43439475	2689.49	0.522666	0.133191	3.92419	8.70206e-05	0.00097977	TRUE	TRUE	not-induced	'3-4	1040	1468	1406	1149	1194	1865	1502	988.95	1505.85	1036.58	1606.48	1095.59	1375.59	835.75
chr1	47368529	47369878	656.079	-0.122146	0.0973916	-1.25418	0.209777	0.543677	FALSE	FALSE	inactive	'3-4	798	653	931	449	790	936	1382	758.829	669.837	686.383	627.77	724.886	690.374	768.979
chr1	53163559	53163933	5286.59	0.219164	0.144296	1.51885	0.1288	0.430771	TRUE	TRUE	not-induced	'3-4	4136	3961	4864	3225	4582	6875	3787	3932.98	4063.13	3586	4509.04	4204.34	5070.86	2107.18
chr1	53791715	53792192	3094.77	-0.0582547	0.101749	-0.572533	0.566961	0.813312	TRUE	TRUE	not-induced	'3-4	2668	2542	3617	1693	2709	3268	3245	2537.04	2607.54	2666.65	2367.07	2485.72	2410.41	1805.6
chr1	57020793	57021614	1777.88	0.290367	0.17148	1.6933	0.0903976	0.355597	FALSE	FALSE	inactive	'3-4	357	433	606	352	513	812	1178	339.476	444.165	446.775	492.149	470.717	598.915	655.468
chr1	58290136	58290636	549.986	-0.0817035	0.130073	-0.628136	0.529915	0.795142	TRUE	TRUE	not-induced	'3-4	795	701	1119	543	773	935	1051	755.976	719.075	824.986	759.196	709.287	689.637	584.802
chr1	61869685	61870185	269.606	-0.00358804	0.134511	-0.0266746	0.978719	0.99346	FALSE	FALSE	inactive	'3-4	268	271	314	173	319	345	595	254.845	277.988	231.498	241.88	292.707	254.465	331.073
chr1	61911965	61912833	354.952	-0.0545502	0.140701	-0.387703	0.698236	0.875191	FALSE	FALSE	inactive	'3-4	319	294	400	188	379	461	943	303.341	301.581	294.901	262.852	347.762	340.024	524.708
chr1	63696966	63697466	112.357	-0.145369	0.145431	-0.999573	0.317517	0.652462	FALSE	FALSE	inactive	'3-4	170	136	234	99	153	204	291	161.655	139.507	172.517	138.417	140.389	150.466	161.92
chr1	64166835	64167335	265.526	-0.265877	0.111996	-2.37398	0.0175975	0.114317	TRUE	TRUE	not-induced	'3-4	381	304	560	236	421	442	460	362.298	311.839	412.862	329.964	386.3	326.01	255.955
chr1	65005698	65008222	587.798	0.0461542	0.102804	0.448954	0.653465	0.854905	FALSE	FALSE	inactive	'3-4	561	502	666	408	565	693	1450	533.463	514.944	491.011	570.446	518.431	511.143	806.815
chr1	68074638	68075197	4240.88	1.281	0.134035	9.55718	1.2101e-21	5.39042e-20	TRUE	TRUE	induced	'3-4	838	2034	1202	1644	1064	2821	1423	796.866	2086.45	886.178	2298.56	976.302	2080.71	791.792
chr1	84971765	84972714	4676.85	-0.022536	0.145824	-0.154543	0.877182	0.953371	TRUE	TRUE	not-induced	'3-4	3941	3749	5695	2732	4605	5851	4878	3747.55	3845.67	4198.66	3819.75	4225.44	4315.58	2714.24
chr1	85872800	85873166	47.4016	-0.237561	0.406172	-0.584878	0.55863	0.810373	FALSE	FALSE	inactive	'3-4	21	10	37	21	34	37	56	19.9692	10.2578	27.2784	29.3612	31.1976	27.2904	31.1598
chr1	89471261	89471761	188.524	0.0641459	0.160102	0.400657	0.688673	0.872035	TRUE	TRUE	not-induced	'3-4	169	158	216	108	152	225	167	160.704	162.074	159.247	151	139.472	165.955	92.9229
chr1	92159059	92159559	448.061	-0.212249	0.105115	-2.0192	0.0434669	0.225357	FALSE	FALSE	inactive	'3-4	439	317	542	263	414	465	928	417.451	325.174	399.591	367.714	379.877	342.974	516.362
chr1	93645997	93646398	3626.97	-0.0240978	0.0814938	-0.295701	0.767459	0.906783	TRUE	TRUE	not-induced	'3-4	3982	3523	5213	2820	4446	5367	4002	3786.54	3613.84	3843.3	3942.79	4079.55	3958.59	2226.81
chr1	94533400	94534921	2499.95	-0.0910203	0.164317	-0.553932	0.579625	0.820022	TRUE	TRUE	not-induced	'3-4	2187	1806	3039	1593	2960	3422	1702	2079.65	1852.57	2240.51	2227.26	2716.03	2524	947.034
chr1	95205148	95205648	509.732	-0.153634	0.0816225	-1.88226	0.0598011	0.27895	TRUE	TRUE	not-induced	'3-4	642	515	758	365	641	727	918	610.486	528.279	558.838	510.325	588.167	536.22	510.798
chr1	97458714	97459157	101.477	0.463051	0.210908	2.19551	0.0281271	0.164639	FALSE	TRUE	not-induced	'3-4	41	90	114	71	79	112	136	38.9875	92.3206	84.0469	99.2688	72.4886	82.6089	75.6737
chr1	109723822	109724979	291.488	-0.033679	0.102094	-0.329883	0.741489	0.895013	FALSE	FALSE	inactive	'3-4	320	296	420	211	337	410	824	304.292	303.632	309.646	295.01	309.224	302.408	458.494
chr1	110259861	110261586	1134.13	-0.177711	0.103478	-1.71738	0.0859101	0.344997	FALSE	FALSE	inactive	'3-4	1467	1162	1877	837	1371	1635	2927	1394.99	1191.96	1383.82	1170.25	1258	1205.94	1628.65
chr1	113137147	113137449	175.081	-0.290345	0.17189	-1.68913	0.0911936	0.357214	TRUE	TRUE	not-induced	'3-4	426	306	582	283	393	371	157	405.089	313.89	429.081	395.677	360.608	273.642	87.3586
chr1	116453910	116454410	1180.33	-0.0756752	0.0917089	-0.825167	0.409277	0.72375	FALSE	FALSE	inactive	'3-4	1072	943	1417	735	1132	1293	2311	1019.38	967.315	1044.69	1027.64	1038.7	953.69	1285.9
chr1	116665778	116667074	1719.3	-0.0984574	0.0696623	-1.41335	0.157552	0.472805	FALSE	FALSE	inactive	'3-4	1382	1209	1834	877	1480	1747	2785	1314.16	1240.17	1352.12	1226.18	1358.01	1288.55	1549.64
chr1	116721461	116721961	701.962	-0.145048	0.0977537	-1.48381	0.13786	0.443578	FALSE	FALSE	inactive	'3-4	929	671	1092	545	793	998	1670	883.399	688.302	805.081	761.993	727.639	736.104	929.229
chr1	145723734	145723993	337.939	-0.204335	0.133818	-1.52696	0.126772	0.427118	FALSE	FALSE	inactive	'3-4	421	306	532	220	374	489	973	400.335	313.89	392.219	307.593	343.174	360.676	541.401
chr1	149890674	149891174	1109.56	-0.0588241	0.123384	-0.476758	0.633534	0.845742	FALSE	FALSE	inactive	'3-4	1428	1116	1729	939	1475	1854	3638	1357.9	1144.78	1274.71	1312.86	1353.43	1367.47	2024.27
chr1	151519674	151520026	835.54	-0.242838	0.226477	-1.07224	0.283612	0.62226	TRUE	TRUE	not-induced	'3-4	471	391	694	308	584	586	600	447.88	401.082	511.654	430.631	535.865	432.222	333.855
chr1	153479190	153479883	1293.86	-0.0933912	0.0997961	-0.93582	0.349366	0.678563	FALSE	FALSE	inactive	'3-4	1070	884	1322	676	1056	1253	2144	1017.48	906.794	974.649	945.15	968.962	924.187	1192.97
chr1	153755599	153756594	5286.31	-0.00546222	0.119773	-0.0456048	0.963625	0.988119	TRUE	TRUE	not-induced	'3-4	4196	3576	5019	2837	4128	5153	3486	3990.03	3668.21	3700.27	3966.56	3787.76	3800.75	1939.7
chr1	154887111	154887556	801.56	1.27513	0.195305	6.52892	6.62473e-11	1.25135e-09	TRUE	TRUE	induced	'3-4	258	704	362	512	346	776	452	245.336	722.152	266.886	715.854	317.482	572.362	251.504
chr1	156896006	156896506	603.753	-0.118598	0.102053	-1.16212	0.245185	0.581384	FALSE	FALSE	inactive	'3-4	731	586	973	485	813	959	1913	695.118	601.11	717.347	678.103	745.99	707.339	1064.44
chr1	164580956	164581513	720.718	0.045873	0.164616	0.278666	0.780501	0.912169	TRUE	TRUE	not-induced	'3-4	507	483	618	322	445	602	711	482.113	495.454	455.623	450.205	408.322	444.023	395.618
chr1	168888116	168888973	376.342	-0.049778	0.120945	-0.411574	0.680651	0.868752	FALSE	FALSE	inactive	'3-4	365	305	394	219	311	372	839	347.083	312.864	290.478	306.195	285.367	274.38	466.84
chr1	173159296	173160093	535.144	-0.194425	0.129448	-1.50195	0.133109	0.436269	FALSE	FALSE	inactive	'3-4	464	460	679	289	648	628	1066	441.224	471.861	500.595	404.066	594.59	463.2	593.148
chr1	182070380	182071095	5957.27	-0.28107	0.129502	-2.1704	0.0299766	0.172697	TRUE	TRUE	not-induced	'3-4	1089	762	1433	631	934	1041	733	1035.54	781.648	1056.48	882.234	857.017	767.82	407.859
chr1	182098175	182098638	264.649	0.077164	0.112787	0.684156	0.493876	0.774466	TRUE	TRUE	not-induced	'3-4	276	302	371	174	279	378	424	262.452	309.787	273.521	243.278	256.004	278.805	235.924
chr1	184874279	184875430	782.389	-0.161508	0.0976203	-1.65445	0.0980368	0.371739	FALSE	FALSE	inactive	'3-4	1065	843	1386	621	949	1174	2327	1012.72	864.737	1021.83	868.252	870.781	865.918	1294.8
chr1	185614390	185615553	276.82	0.445799	0.128929	3.45772	0.000544769	0.00542078	FALSE	TRUE	not-induced	'3-4	205	262	268	205	275	432	419	194.937	268.756	197.584	286.621	252.334	318.634	233.142
chr1	197191386	197191886	1707.38	-0.00827973	0.156725	-0.0528298	0.957868	0.985647	TRUE	TRUE	not-induced	'3-4	907	866	1226	658	917	1068	845	862.479	888.33	903.873	919.984	841.418	787.735	470.179
chr1	197632475	197632879	92.2501	-0.502363	0.19749	-2.54373	0.0109675	0.0782554	FALSE	FALSE	inactive	'3-4	131	76	174	65	139	134	261	124.57	77.9596	128.282	90.8798	127.543	98.8357	145.227
chr1	200186818	200187318	513.306	-0.141528	0.134539	-1.05195	0.292824	0.630426	FALSE	FALSE	inactive	'3-4	694	626	866	407	804	856	1735	659.934	642.141	638.461	569.048	737.732	631.368	965.396
chr1	201683675	201684402	850.328	0.0896946	0.147117	0.609681	0.542073	0.801811	TRUE	TRUE	not-induced	'3-4	1219	1190	1781	1062	1790	2265	1121	1159.16	1220.68	1313.05	1484.84	1642.46	1670.62	623.752
chr1	201910622	201911122	1460.67	-0.01929	0.108225	-0.178239	0.858535	0.946361	TRUE	TRUE	not-induced	'3-4	949	902	1368	654	965	1249	1552	902.417	925.258	1008.56	914.391	885.462	921.237	863.571
chr1	201986812	201988687	7917.9	-0.135716	0.0699059	-1.94141	0.0522082	0.255048	TRUE	TRUE	not-induced	'3-4	11632	8796	13673	6993	11401	13506	13796	11061	9022.8	10080.5	9777.27	10461.3	9961.75	7676.43
chr1	202681869	202682706	617.053	-0.0700882	0.0860435	-0.814566	0.415321	0.728021	FALSE	FALSE	inactive	'3-4	643	533	782	406	615	753	1710	611.437	546.743	576.532	567.649	564.31	555.397	951.486
chr1	204653866	204654366	5318.58	-0.070787	0.115789	-0.611342	0.540973	0.800984	TRUE	TRUE	not-induced	'3-4	5486	4590	6738	3293	5355	6859	6065	5216.71	4708.35	4967.61	4604.11	4913.63	5059.06	3374.71
chr1	204972766	204973266	816.255	-0.000403989	0.0820055	-0.00492637	0.996069	0.999074	FALSE	FALSE	inactive	'3-4	773	764	1065	589	919	1032	1997	735.056	783.7	785.175	823.511	843.254	761.182	1111.18
chr1	205473725	205474064	264.943	0.0366858	0.149406	0.245544	0.806035	0.922482	FALSE	FALSE	inactive	'3-4	213	218	279	135	242	312	691	202.545	223.621	205.694	188.75	222.054	230.125	384.489
chr1	210592622	210593122	335.409	0.075755	0.115894	0.653656	0.513334	0.786221	FALSE	FALSE	inactive	'3-4	272	316	395	212	340	392	550	258.648	324.148	291.215	296.408	311.976	289.131	306.033
chr1	210618542	210619042	129.491	-0.0673622	0.163876	-0.411055	0.681032	0.868774	FALSE	FALSE	inactive	'3-4	190	131	186	119	179	215	415	180.674	134.378	137.129	166.38	164.246	158.58	230.916
chr1	211653116	211653616	589.498	-0.20344	0.093764	-2.1697	0.0300293	0.172792	FALSE	FALSE	inactive	'3-4	801	553	857	419	686	814	1229	761.682	567.259	631.826	585.825	629.458	600.39	683.846
chr1	211687382	211689293	8740.5	-0.0951652	0.0953536	-0.998024	0.318268	0.653378	TRUE	FALSE	not-induced	'3-4	6425	5738	8239	3888	6857	8093	10655	6109.62	5885.95	6074.23	5436.01	6291.83	5969.23	5928.7
chr1	211712611	211713111	1440.4	-0.170191	0.0956105	-1.78005	0.0750682	0.317293	FALSE	FALSE	inactive	'3-4	2086	1650	2381	1112	1780	2070	3817	1983.61	1692.54	1755.4	1554.74	1633.29	1526.79	2123.87
chr1	218633294	218633695	1927.93	-0.0437582	0.145526	-0.30069	0.763651	0.904577	TRUE	TRUE	not-induced	'3-4	558	476	833	462	756	881	566	530.61	488.274	614.132	645.946	693.688	649.808	314.936
chr1	221099384	221099884	283.564	-0.0931519	0.103086	-0.903635	0.366189	0.692336	FALSE	FALSE	inactive	'3-4	339	266	390	198	308	386	693	322.36	272.859	287.529	276.834	282.614	284.706	385.602
chr1	224267705	224268205	674.681	-0.0470254	0.117809	-0.399168	0.68977	0.872035	TRUE	TRUE	not-induced	'3-4	1005	919	1290	633	1209	1470	1034	955.668	942.696	951.057	885.03	1109.35	1084.24	575.343
chr1	226105143	226105643	1963.27	-0.0711366	0.201873	-0.352383	0.724551	0.887346	TRUE	TRUE	not-induced	'3-4	1426	1091	1660	929	1405	1715	1631	1356	1119.13	1223.84	1298.88	1289.2	1264.95	907.528
chr1	227616476	227616979	296.226	-0.045697	0.16474	-0.277389	0.781481	0.912643	TRUE	TRUE	not-induced	'3-4	285	249	339	170	274	344	441	271.01	255.42	249.929	237.686	251.416	253.727	245.383
chr1	229335045	229335545	542.127	-0.122232	0.0956962	-1.27729	0.201499	0.533844	FALSE	FALSE	inactive	'3-4	523	481	703	318	551	622	1225	497.328	493.402	518.289	444.612	505.585	458.774	681.62
chr1	230344255	230344694	942.167	0.0650609	0.0884974	0.735173	0.462234	0.754597	FALSE	FALSE	inactive	'3-4	905	736	1053	648	900	1238	2031	860.577	754.978	776.328	906.002	825.82	913.123	1130.1
chr1	230417231	230418239	846.693	-0.114157	0.0813321	-1.40359	0.16044	0.476357	FALSE	FALSE	inactive	'3-4	810	693	1003	487	859	984	1815	770.24	710.869	739.465	680.9	788.199	725.778	1009.91
chr1	231328292	231329083	1370.11	-0.101396	0.114276	-0.887292	0.374922	0.700053	TRUE	TRUE	not-induced	'3-4	1010	852	1252	646	1103	1248	1254	960.423	873.969	923.041	903.206	1012.09	920.499	697.756
chr1	232680209	232680709	260.065	-0.0501113	0.17722	-0.282763	0.777359	0.910604	FALSE	FALSE	inactive	'3-4	242	279	320	180	352	305	673	230.121	286.194	235.921	251.667	322.987	224.962	374.474
chr1	234666735	234667235	888.616	-0.1827	0.0805267	-2.26881	0.0232799	0.143421	TRUE	FALSE	not-induced	'3-4	865	670	1003	469	784	901	1302	822.54	687.276	739.465	655.733	719.381	664.559	724.465
chr1	234886889	234887460	306.211	0.0140087	0.113431	0.1235	0.901711	0.963645	FALSE	FALSE	inactive	'3-4	325	299	398	201	317	421	950	309.047	306.71	293.427	281.028	290.872	310.521	528.603
chr1	234961542	234962042	418.836	0.0152518	0.0998491	0.152748	0.878597	0.954154	FALSE	TRUE	not-induced	'3-4	491	464	652	360	521	631	862	466.899	475.964	480.689	503.335	478.058	465.413	479.638
chr1	246981030	246981530	179.255	-0.00567669	0.153709	-0.0369314	0.97054	0.990395	FALSE	FALSE	inactive	'3-4	163	154	182	76	130	187	1305	154.999	157.971	134.18	106.26	119.285	137.927	726.134
chr10	1530317	1530817	178.373	-0.0148057	0.137882	-0.107379	0.914488	0.967309	FALSE	FALSE	inactive	'3-4	190	184	266	123	179	238	396	180.674	188.744	196.109	171.973	164.246	175.544	220.344
chr10	5586492	5590507	4919.78	-0.0880831	0.0533962	-1.64961	0.0990224	0.373791	TRUE	TRUE	not-induced	'3-4	5590	4778	6993	3523	5444	6412	7580	5315.61	4901.2	5155.61	4925.69	4995.29	4729.36	4217.7
chr10	13389794	13390747	1211.26	-0.0574113	0.0916102	-0.626691	0.530862	0.795514	TRUE	TRUE	not-induced	'3-4	1000	978	1400	634	1043	1267	1430	950.914	1003.22	1032.15	886.428	957.033	934.513	795.687
chr10	27836410	27836910	695.479	-0.110858	0.109066	-1.01643	0.309425	0.645571	TRUE	TRUE	not-induced	'3-4	881	688	1059	552	743	893	1067	837.755	705.74	780.751	771.78	681.76	658.658	593.705
chr10	29311413	29312969	604.317	-0.0649006	0.106874	-0.60726	0.543678	0.803022	TRUE	FALSE	not-induced	'3-4	723	647	1003	507	906	1061	1328	687.51	663.683	739.465	708.863	831.325	782.572	738.932
chr10	34364183	34364683	1159.01	-0.176529	0.10699	-1.64996	0.0989513	0.37372	FALSE	FALSE	inactive	'3-4	1463	1230	1675	777	1534	1647	2492	1391.19	1261.72	1234.9	1086.36	1407.56	1214.79	1386.61
chr10	45915870	45916370	725.923	-0.203159	0.0975969	-2.08161	0.037378	0.20245	TRUE	TRUE	not-induced	'3-4	813	584	926	440	719	843	1010	773.093	599.058	682.697	615.187	659.738	621.78	561.989
chr10	47677108	47677608	298.082	-0.12569	0.141173	-0.890328	0.37329	0.699198	FALSE	FALSE	inactive	'3-4	360	246	423	194	290	429	1016	342.329	252.343	311.858	271.241	266.097	316.422	565.327
chr10	73006556	73007056	1445.94	0.0930215	0.112068	0.830044	0.406514	0.72197	TRUE	TRUE	not-induced	'3-4	1769	1599	2343	1371	1514	2129	1566	1682.17	1640.23	1727.38	1916.87	1389.21	1570.31	871.361
chr10	73103037	73103537	376.814	-0.262492	0.106418	-2.46662	0.0136396	0.0929168	FALSE	FALSE	inactive	'3-4	482	407	621	265	473	462	965	458.34	417.494	457.834	370.51	434.014	340.762	536.95
chr10	76345215	76345680	160.818	0.206669	0.138295	1.49441	0.135068	0.439745	FALSE	FALSE	inactive	'3-4	124	141	180	102	133	195	388	117.913	144.636	132.706	142.611	122.038	143.828	215.893
chr10	80722108	80722608	493.493	0.061486	0.094293	0.652074	0.514353	0.786826	FALSE	FALSE	inactive	'3-4	483	470	645	354	459	603	950	459.291	482.119	475.528	494.946	421.168	444.76	528.603
chr10	80834333	80834833	2597.13	-0.0874495	0.112556	-0.77694	0.437194	0.738766	TRUE	FALSE	not-induced	'3-4	2221	1842	2772	1416	2094	2512	3530	2111.98	1889.5	2043.67	1979.78	1921.41	1852.8	1964.18
chr10	81100555	81101055	610.841	-0.0132044	0.104185	-0.12674	0.899146	0.963207	FALSE	FALSE	inactive	'3-4	556	492	638	319	484	645	1039	528.708	504.686	470.368	446.01	444.107	475.739	578.125
chr10	81838602	81839367	6506.01	-0.0616998	0.0966288	-0.638524	0.523133	0.792487	TRUE	TRUE	not-induced	'3-4	4900	4025	6018	3091	4502	5727	5742	4659.48	4128.78	4436.79	4321.69	4130.93	4224.12	3194.99
chr10	87375750	87376463	981.207	0.221684	0.0884567	2.50613	0.012206	0.0850141	FALSE	FALSE	inactive	'3-4	900	999	1229	787	971	1324	1951	855.822	1024.76	906.084	1100.35	890.968	976.555	1085.58
chr10	89417026	89417491	277.326	1.24884	0.161351	7.73987	9.95167e-15	2.56394e-13	TRUE	TRUE	induced	'3-4	142	468	255	278	229	542	292	135.03	480.067	188	388.686	210.125	399.768	162.476
chr10	93449933	93450433	1452.84	-0.129082	0.0908849	-1.42028	0.155527	0.469992	FALSE	FALSE	inactive	'3-4	1648	1332	1842	920	1626	1871	4102	1567.11	1366.35	1358.02	1286.3	1491.98	1380.01	2282.45
chr10	97003983	97004483	285.481	-0.0571371	0.113714	-0.502461	0.615343	0.836589	FALSE	FALSE	inactive	'3-4	287	275	422	197	295	362	726	272.912	282.091	311.121	275.436	270.685	267.004	403.964
chr10	97046448	97046948	236.126	-0.261813	0.141744	-1.84708	0.0647354	0.292373	FALSE	FALSE	inactive	'3-4	211	153	326	138	247	280	635	200.643	156.945	240.345	192.945	226.642	206.522	353.33
chr10	97413358	97413840	186.785	-0.0462054	0.162746	-0.283911	0.776478	0.910401	FALSE	FALSE	inactive	'3-4	153	147	232	123	171	190	333	145.49	150.79	171.043	171.973	156.906	140.14	185.289
chr10	104004819	104005315	2581.38	-0.0708161	0.120668	-0.586867	0.557293	0.809796	TRUE	TRUE	not-induced	'3-4	2559	1955	3092	1760	2643	3161	2628	2433.39	2005.41	2279.59	2460.75	2425.16	2331.49	1462.28
chr10	104026362	104026862	314.291	-0.13325	0.141189	-0.943769	0.345288	0.676176	FALSE	FALSE	inactive	'3-4	310	275	522	210	342	447	830	294.783	282.091	384.846	293.612	313.811	329.698	461.832
chr10	105302789	105304227	1613.88	0.0607466	0.0696139	0.872621	0.38287	0.705601	FALSE	FALSE	inactive	'3-4	1802	1685	2384	1274	1762	2438	3923	1713.55	1728.45	1757.61	1781.24	1616.77	1798.22	2182.85
chr10	112597040	112597390	147.924	-0.332406	0.141346	-2.35173	0.0186865	0.119659	FALSE	FALSE	inactive	'3-4	166	115	216	90	199	202	354	157.852	117.965	159.247	125.834	182.598	148.991	196.974
chr10	116096734	116097234	1970.1	-0.0304352	0.088383	-0.344356	0.730579	0.890264	FALSE	FALSE	inactive	'3-4	1833	1592	2241	1207	1761	2154	3055	1743.02	1633.05	1652.18	1687.57	1615.85	1588.75	1699.88
chr10	119853279	119853890	714.409	0.611569	0.161752	3.7809	0.000156263	0.00170435	TRUE	TRUE	not-induced	'3-4	599	822	767	641	714	1347	964	569.597	843.195	565.473	896.215	655.15	993.52	536.393
chr10	123338400	123340883	2429.55	-0.118485	0.0914859	-1.29512	0.195278	0.526211	TRUE	FALSE	not-induced	'3-4	1935	1542	2400	1246	2012	2308	3133	1840.02	1581.76	1769.41	1742.1	1846.17	1702.33	1743.28
chr10	123792921	123793421	199.251	-0.0777841	0.118136	-0.658428	0.510263	0.785472	FALSE	FALSE	inactive	'3-4	272	239	336	190	303	319	517	258.648	245.163	247.717	265.649	278.026	235.288	287.671
chr10	123802292	123802792	132.183	0.207533	0.156541	1.32574	0.184926	0.513712	FALSE	FALSE	inactive	'3-4	129	150	165	82	120	187	336	122.668	153.868	121.647	114.648	110.109	137.927	186.959
chr10	126773308	126774804	2926.32	-0.119357	0.079507	-1.50121	0.133301	0.436567	TRUE	TRUE	not-induced	'3-4	2472	2085	3348	1617	2699	3140	3876	2350.66	2138.76	2468.32	2260.81	2476.54	2316	2156.7
chr10	127748012	127748346	73.2792	0.203463	0.240732	0.845185	0.398007	0.716493	FALSE	FALSE	inactive	'3-4	90	104	93	60	82	100	176	85.5822	106.682	68.5646	83.8891	75.2413	73.758	97.9307
chr10	133478249	133478749	1573.56	0.206838	0.085019	2.43284	0.0149807	0.100521	TRUE	TRUE	not-induced	'3-4	1408	1426	1726	1086	1412	2070	1951	1338.89	1462.77	1272.5	1518.39	1295.62	1526.79	1085.58
chr10	133488872	133489372	4401.85	-0.0121116	0.141854	-0.0853803	0.931959	0.974841	FALSE	FALSE	inactive	'3-4	2931	2691	4005	2045	3675	4626	12363	2787.13	2760.39	2952.7	2859.22	3372.1	3412.04	6879.08
chr10	134282664	134283164	931.451	0.104911	0.104391	1.00498	0.314908	0.651268	TRUE	TRUE	not-induced	'3-4	744	762	951	598	782	918	1255	707.48	781.648	701.128	836.095	717.546	677.098	698.313
chr10	134577876	134578376	12685.9	0.107246	0.115357	0.929683	0.352535	0.68162	FALSE	FALSE	inactive	'3-4	14639	13603	16885	10013	13121	18194	45956	13920.4	13953.7	12448.5	13999.7	12039.5	13419.5	25571
chr11	704717	705217	3488.63	-0.00287504	0.101889	-0.0282174	0.977489	0.992904	TRUE	TRUE	not-induced	'3-4	2737	2473	3405	1802	2737	3460	4021	2602.65	2536.77	2510.35	2519.47	2511.41	2552.03	2237.38
chr11	1073280	1073780	4039.99	0.0365614	0.142879	0.25589	0.798035	0.919824	TRUE	TRUE	not-induced	'3-4	4103	3754	5664	3065	3576	4772	3362	3901.6	3850.8	4175.8	4285.33	3281.26	3519.73	1870.7
chr11	2504815	2505167	1373.14	0.835586	0.130722	6.39206	1.63662e-10	2.99259e-09	FALSE	TRUE	not-induced	'3-4	1249	2156	1390	1470	1226	2293	2142	1187.69	2211.59	1024.78	2055.28	1124.95	1691.27	1191.86
chr11	6608718	6609218	468.977	-0.159447	0.126585	-1.25961	0.207811	0.541315	TRUE	FALSE	not-induced	'3-4	507	455	793	339	495	578	875	482.113	466.732	584.642	473.973	454.201	426.321	486.871
chr11	8758687	8759342	2505.47	0.0629462	0.118815	0.529783	0.596262	0.827714	TRUE	TRUE	not-induced	'3-4	2332	2172	3062	1672	2722	3678	3414	2217.53	2228	2257.47	2337.71	2497.65	2712.82	1899.63
chr11	11990609	11990999	1330.54	0.546416	0.0948383	5.76156	8.3342e-09	1.36821e-07	TRUE	TRUE	not-induced	'3-4	842	1231	1240	957	1065	1807	993	800.669	1262.74	914.194	1338.03	977.22	1332.81	552.529
chr11	14402340	14403187	6530.9	-0.169897	0.0780163	-2.17771	0.029428	0.170361	TRUE	TRUE	not-induced	'3-4	5646	4429	7116	3413	5249	5977	4694	5368.86	4543.2	5246.29	4771.89	4816.36	4408.51	2611.86
chr11	17034458	17034958	2239.04	-0.20399	0.0644253	-3.16631	0.00154385	0.0140608	TRUE	TRUE	not-induced	'3-4	3572	2756	4512	2211	3873	4075	2373	3396.66	2827.06	3326.49	3091.31	3553.78	3005.64	1320.4
chr11	28364740	28365054	281.984	-0.26498	0.248878	-1.0647	0.287013	0.624707	TRUE	TRUE	not-induced	'3-4	74	60	85	32	52	60	37	70.3676	61.5471	62.6665	44.7408	47.714	44.2548	20.5877
chr11	31896103	31896603	377.209	-0.281639	0.141411	-1.99163	0.0464111	0.236505	TRUE	FALSE	not-induced	'3-4	425	404	751	274	625	623	765	404.138	414.417	553.677	383.094	573.486	459.512	425.665
chr11	34810193	34811719	2446.43	-0.0267854	0.109128	-0.245449	0.806109	0.92249	FALSE	FALSE	inactive	'3-4	1922	1770	2386	1309	2201	2516	3532	1827.66	1815.64	1759.09	1830.18	2019.59	1855.75	1965.29
chr11	35831497	35831997	193.72	-0.110324	0.152446	-0.723691	0.469256	0.759448	FALSE	FALSE	inactive	'3-4	193	191	303	130	202	235	359	183.526	195.925	223.388	181.76	185.351	173.331	199.756
chr11	44610858	44612789	1674.78	-0.0760672	0.0904484	-0.841002	0.400347	0.718141	TRUE	TRUE	not-induced	'3-4	2385	2165	2938	1513	2440	2706	3287	2267.93	2220.82	2166.05	2115.4	2238.89	1995.89	1828.97
chr11	44914782	44915282	695.702	-0.116735	0.0862719	-1.3531	0.176024	0.499794	TRUE	FALSE	not-induced	'3-4	821	682	1018	499	748	884	1251	780.7	699.585	750.524	697.678	686.348	652.02	696.087
chr11	44972172	44972672	792.415	0.443816	0.569079	0.779885	0.435459	0.738063	FALSE	TRUE	not-induced	'3-4	565	1036	1153	511	762	1438	1390	537.266	1062.71	850.053	714.455	699.194	1060.64	773.43
chr11	45201786	45202286	1384.55	0.0133421	0.171044	0.078004	0.937825	0.977366	TRUE	TRUE	not-induced	'3-4	1040	1111	1611	697	1171	1580	1524	988.95	1139.65	1187.72	974.512	1074.48	1165.38	847.991
chr11	46774670	46775170	187.354	0.0419053	0.143648	0.291721	0.7705	0.908052	FALSE	FALSE	inactive	'3-4	169	180	204	120	192	204	561	160.704	184.641	150.4	167.778	176.175	150.466	312.154
chr11	48071422	48071922	170.536	-0.0991786	0.125091	-0.79285	0.427865	0.734346	FALSE	FALSE	inactive	'3-4	214	180	256	124	188	230	490	203.495	184.641	188.737	173.371	172.505	169.643	272.648
chr11	57270382	57270882	1016.48	0.0144915	0.134431	0.107799	0.914155	0.967144	FALSE	FALSE	inactive	'3-4	1053	974	1332	698	1073	1385	2893	1001.31	999.114	982.021	975.91	984.561	1021.55	1609.74
chr11	58690653	58692020	283.466	-0.295927	0.105668	-2.80054	0.00510167	0.0403478	FALSE	FALSE	inactive	'3-4	327	266	400	176	349	320	829	310.949	272.859	294.901	246.075	320.235	236.025	461.276
chr11	59382763	59384115	11180.5	0.0809928	0.186492	0.434297	0.664073	0.861143	TRUE	TRUE	not-induced	'3-4	7956	8541	12929	5926	10173	14790	4923	7565.47	8761.23	9531.95	8285.45	9334.51	10908.8	2739.28
chr11	61256203	61258028	2808.44	-0.0994638	0.0630613	-1.57725	0.114737	0.404194	TRUE	FALSE	not-induced	'3-4	3182	2583	3848	2013	3258	3792	5032	3025.81	2649.6	2836.95	2814.48	2989.47	2796.9	2799.93
chr11	61355692	61356192	1494.59	-0.243338	0.0771896	-3.15247	0.00161897	0.0146484	FALSE	FALSE	inactive	'3-4	2067	1600	2486	1083	2118	2285	3519	1965.54	1641.26	1832.81	1514.2	1943.43	1685.37	1958.06
chr11	62598850	62599805	3672.07	-0.0659995	0.0896257	-0.73639	0.461493	0.754597	TRUE	TRUE	not-induced	'3-4	3212	2849	4056	2029	3540	4219	3899	3054.33	2922.46	2990.3	2836.85	3248.22	3111.85	2169.5
chr11	63636561	63637061	282.635	0.0938767	0.128559	0.730223	0.465254	0.75696	FALSE	FALSE	inactive	'3-4	242	240	340	204	225	287	888	230.121	246.188	250.666	285.223	206.455	211.685	494.105
chr11	64863443	64863888	8848.63	0.0116528	0.0995805	0.117018	0.906845	0.964366	TRUE	TRUE	not-induced	'3-4	4801	4077	5956	3485	5299	6610	1924	4565.34	4182.12	4391.08	4872.56	4862.24	4875.4	1070.56
chr11	65149528	65150004	5265.43	-0.140128	0.107362	-1.30518	0.19183	0.522356	TRUE	TRUE	not-induced	'3-4	4991	4030	6893	3443	6510	7303	2375	4746.01	4133.91	5081.89	4813.84	5973.43	5386.54	1321.51
chr11	65581572	65582072	404.865	-0.124931	0.120896	-1.03338	0.301425	0.638151	FALSE	FALSE	inactive	'3-4	481	457	673	294	467	529	931	457.389	468.784	496.171	411.057	428.509	390.18	518.031
chr11	67867025	67867525	187.716	0.00128663	0.13633	0.00943763	0.99247	0.998285	FALSE	FALSE	inactive	'3-4	167	176	227	130	201	207	393	158.803	180.538	167.356	181.76	184.433	152.679	218.675
chr11	69330034	69332839	5594.86	1.44955	0.11091	13.0697	4.9077e-39	9.74655e-37	TRUE	TRUE	induced	'3-4	5509	15667	7987	11524	5734	17070	4236	5238.58	16071	5888.44	16112.3	5261.39	12590.5	2357.01
chr11	69336086	69336586	373.374	0.00528178	0.116207	0.0454515	0.963747	0.988142	FALSE	FALSE	inactive	'3-4	435	373	545	333	418	493	786	413.647	382.618	401.803	465.584	383.547	363.627	437.35
chr11	69354708	69355208	661.88	-0.249809	0.118742	-2.10379	0.0353965	0.195268	FALSE	FALSE	inactive	'3-4	472	373	633	274	468	498	818	448.831	382.618	466.681	383.094	429.426	367.315	455.155
chr11	70021081	70021888	3840.93	0.0118513	0.110554	0.107199	0.914631	0.967309	TRUE	TRUE	not-induced	'3-4	2450	2265	2969	1654	2406	2912	2906	2329.74	2323.4	2188.9	2312.54	2207.69	2147.83	1616.97
chr11	70864203	70864703	248.007	-0.320776	0.149745	-2.14215	0.0321817	0.182678	FALSE	FALSE	inactive	'3-4	240	160	299	136	314	313	603	228.219	164.126	220.439	190.149	288.119	230.862	335.524
chr11	71192400	71192797	1658.29	0.55675	0.405093	1.37437	0.169325	0.488924	TRUE	TRUE	not-induced	'3-4	1540	2072	2176	1817	1484	2511	1016	1464.41	2125.43	1604.26	2540.44	1361.68	1852.06	565.327
chr11	72108836	72109601	1896.75	0.0829382	0.163113	0.50847	0.611124	0.835017	TRUE	TRUE	not-induced	'3-4	636	606	745	411	654	893	1016	604.781	621.626	549.254	574.64	600.096	658.658	565.327
chr11	72968799	72969295	1954.69	0.171164	0.1176	1.45548	0.145537	0.455867	FALSE	FALSE	inactive	'3-4	804	868	1044	630	866	1155	1800	764.534	890.381	769.692	880.835	794.622	851.904	1001.56
chr11	74158661	74159161	219.437	-0.304453	0.123828	-2.45868	0.0139448	0.0945007	FALSE	FALSE	inactive	'3-4	222	176	270	113	258	245	792	211.103	180.538	199.058	157.991	236.735	180.707	440.688
chr11	78006375	78006875	566.812	-0.0617779	0.126232	-0.489401	0.624558	0.841699	TRUE	TRUE	not-induced	'3-4	605	564	868	420	625	747	1023	575.303	578.543	639.936	587.224	573.486	550.972	569.222
chr11	82996945	82997298	3311.95	0.000763746	0.110056	0.00693959	0.994463	0.998864	TRUE	TRUE	not-induced	'3-4	2147	1943	2881	1607	2369	2855	1717	2041.61	1993.1	2124.03	2246.83	2173.74	2105.79	955.381
chr11	85812922	85813422	85.4949	-0.208791	0.202554	-1.03079	0.302638	0.639401	FALSE	FALSE	inactive	'3-4	88	96	177	55	109	130	246	83.6804	98.4753	130.494	76.8983	100.016	95.8853	136.88
chr11	91715160	91715488	203.937	-0.0779359	0.164901	-0.472621	0.636483	0.8469	FALSE	FALSE	inactive	'3-4	147	139	236	128	190	197	360	139.784	142.584	173.992	178.963	174.34	145.303	200.313
chr11	95878339	95878841	278.108	-0.192917	0.123556	-1.56137	0.118436	0.411147	TRUE	FALSE	not-induced	'3-4	386	332	565	250	443	477	648	367.053	340.561	416.548	349.538	406.487	351.825	360.563
chr11	110166313	110166912	2940.74	0.0210244	0.1504	0.13979	0.888826	0.958532	TRUE	TRUE	not-induced	'3-4	964	1016	1453	590	1054	1527	1236	916.681	1042.2	1071.23	824.909	967.127	1126.28	687.741
chr11	111671196	111671645	282.212	0.207023	0.137489	1.50575	0.132132	0.435411	FALSE	FALSE	inactive	'3-4	273	336	398	244	352	443	806	259.599	344.664	293.427	341.149	322.987	326.748	448.478
chr11	112214072	112214572	459.974	-0.0675033	0.125022	-0.539931	0.589245	0.82394	TRUE	FALSE	not-induced	'3-4	518	480	699	345	523	607	882	492.573	492.377	515.34	482.362	479.893	447.711	490.766
chr11	115435605	115435968	449.23	0.118759	0.0954931	1.24364	0.213631	0.547204	FALSE	FALSE	inactive	'3-4	392	385	470	295	384	490	736	372.758	394.927	346.509	412.455	352.35	361.414	409.528
chr11	115812457	115812815	805.02	0.606703	0.190301	3.18812	0.00143201	0.0130975	TRUE	TRUE	not-induced	'3-4	409	657	582	430	451	815	405	388.924	673.941	429.081	601.205	413.827	601.127	225.352
chr11	118799674	118801292	2850.15	-0.0964782	0.0795473	-1.21284	0.225191	0.559973	TRUE	FALSE	not-induced	'3-4	3043	2474	3578	1829	2997	3588	4667	2893.63	2537.79	2637.89	2557.22	2749.98	2646.44	2596.83
chr11	119534833	119535333	987.971	-0.121256	0.112034	-1.08232	0.279112	0.617233	FALSE	FALSE	inactive	'3-4	1105	814	1194	673	955	1097	2567	1050.76	834.989	880.28	940.956	876.286	809.125	1428.34
chr11	120151261	120151761	640.747	-0.450258	0.124031	-3.63022	0.000283183	0.00295781	TRUE	FALSE	not-induced	'3-4	620	431	874	324	693	641	949	589.566	442.113	644.359	453.001	635.881	472.788	528.047
chr11	120754482	120754982	366.134	-0.170252	0.113277	-1.50297	0.132846	0.436249	FALSE	FALSE	inactive	'3-4	382	327	490	235	379	397	783	363.249	335.432	361.254	328.566	347.762	292.819	435.68
chr11	121526256	121526699	1168.23	-0.0348716	0.0941999	-0.370187	0.711243	0.88184	TRUE	TRUE	not-induced	'3-4	988	818	1178	625	1044	1328	1500	939.503	839.092	868.484	873.845	957.951	979.506	834.637
chr11	126010798	126011298	898.923	0.00138782	0.0822383	0.0168756	0.986536	0.996103	FALSE	FALSE	inactive	'3-4	1304	1082	1564	837	1163	1603	2328	1239.99	1109.9	1153.06	1170.25	1067.14	1182.34	1295.36
chr11	128888173	128888673	5.17813	-0.538222	0.66489	-0.80949	0.418233	0.729245	TRUE	FALSE	not-induced	'3-4	5	5	7	4	7	2	8	4.75457	5.12892	5.16077	5.59261	6.42304	1.47516	4.4514
chr12	1329773	1330273	660.39	0.0850613	0.122578	0.693938	0.487721	0.770793	FALSE	FALSE	inactive	'3-4	596	527	640	417	593	752	1800	566.744	540.589	471.842	583.029	544.123	554.66	1001.56
chr12	2280088	2280588	1475.3	0.535232	0.10002	5.35126	8.73428e-08	1.31603e-06	TRUE	TRUE	not-induced	'3-4	1119	1502	1313	1110	1091	1774	1680	1064.07	1540.73	968.014	1551.95	1001.08	1308.47	934.793
chr12	2788971	2789471	3417.62	-0.0358569	0.0990969	-0.361837	0.717474	0.884532	TRUE	TRUE	not-induced	'3-4	3737	3290	4443	2358	3446	4171	4564	3553.56	3374.83	3275.62	3296.84	3161.97	3076.44	2539.52
chr12	6338239	6340233	4016.89	-0.157793	0.0721072	-2.18831	0.028647	0.166986	TRUE	FALSE	not-induced	'3-4	3341	2869	4196	1879	3438	3891	5067	3177	2942.98	3093.51	2627.13	3154.63	2869.92	2819.4
chr12	6873072	6873885	4516.67	-0.10317	0.173906	-0.593253	0.553012	0.807791	FALSE	FALSE	inactive	'3-4	3903	3191	5363	2634	4482	5434	8544	3711.42	3273.28	3953.89	3682.73	4112.58	4008.01	4754.09
chr12	8038687	8038896	0.461083	0.175551	2.11293	0.0830843	0.933785	0.975839	FALSE	FALSE	inactive	'3-4	0	1	1	0	1	1	2	0	1.02578	0.737253	0	0.917577	0.73758	1.11285
chr12	12102723	12103223	690.084	-0.186057	0.087831	-2.11835	0.0341452	0.190496	FALSE	FALSE	inactive	'3-4	781	643	1028	478	782	849	1356	742.663	659.58	757.896	668.316	717.546	626.205	754.512
chr12	14408505	14409005	139.645	-0.163973	0.134774	-1.21665	0.223738	0.558721	FALSE	FALSE	inactive	'3-4	155	136	181	75	154	173	328	147.392	139.507	133.443	104.861	141.307	127.601	182.507
chr12	14720209	14720709	4752.68	-0.0644337	0.0897906	-0.7176	0.473004	0.761073	TRUE	TRUE	not-induced	'3-4	3800	3299	5136	2448	3610	4663	3950	3613.47	3384.06	3786.53	3422.67	3312.45	3439.33	2197.88
chr12	14994763	14995096	683.091	-0.340757	0.237968	-1.43195	0.152159	0.464689	TRUE	TRUE	not-induced	'3-4	894	666	1209	524	1421	1337	378	850.117	683.173	891.339	732.631	1303.88	986.144	210.328
chr12	15373575	15373990	118.481	0.067585	0.170656	0.39603	0.692083	0.872441	FALSE	FALSE	inactive	'3-4	104	121	170	93	117	134	215	98.895	124.12	125.333	130.028	107.357	98.8357	119.631
chr12	25934137	25934637	232.783	-0.034754	0.121304	-0.286503	0.774493	0.909608	FALSE	FALSE	inactive	'3-4	275	240	340	173	237	307	514	261.501	246.188	250.666	241.88	217.466	226.437	286.002
chr12	28343535	28344035	5892.09	-0.113591	0.140913	-0.806112	0.420178	0.730061	TRUE	TRUE	not-induced	'3-4	3976	3205	4590	2474	4477	4976	3899	3780.83	3287.64	3383.99	3459.03	4107.99	3670.2	2169.5
chr12	31799862	31800517	1615.01	-0.136361	0.0801592	-1.70113	0.0889183	0.352493	TRUE	FALSE	not-induced	'3-4	1905	1540	2061	1002	1765	2053	2940	1811.49	1579.71	1519.48	1400.95	1619.52	1514.25	1635.89
chr12	31874826	31875295	558.155	0.0800062	0.112091	0.713759	0.475377	0.762634	FALSE	FALSE	inactive	'3-4	506	508	556	378	564	600	2074	481.162	521.099	409.913	528.501	517.514	442.548	1154.02
chr12	38450789	38451289	352.01	-0.281893	0.143122	-1.96959	0.0488853	0.243983	TRUE	FALSE	not-induced	'3-4	579	411	638	295	607	624	782	550.579	421.598	470.368	412.455	556.969	460.25	435.124
chr12	40135464	40135890	724.9	0.736676	0.173477	4.24653	2.17109e-05	0.000260004	TRUE	TRUE	not-induced	'3-4	345	602	482	454	468	817	442	328.065	617.522	355.356	634.761	429.426	602.602	245.94
chr12	45839791	45840291	164.989	-0.141414	0.168043	-0.841536	0.400048	0.717913	FALSE	FALSE	inactive	'3-4	149	115	187	96	211	233	284	141.686	117.965	137.866	134.223	193.609	171.856	158.025
chr12	50135680	50136180	3210.74	0.253256	0.151258	1.67433	0.0940661	0.363863	TRUE	TRUE	not-induced	'3-4	2646	2764	3649	2313	3243	4990	2824	2516.12	2835.27	2690.24	3233.92	2975.7	3680.52	1571.34
chr12	50623390	50623890	812.774	-0.0631012	0.104749	-0.602406	0.546904	0.805623	FALSE	FALSE	inactive	'3-4	1046	857	1205	630	1012	1258	2867	994.656	879.097	888.39	880.835	928.588	927.875	1595.27
chr12	51159218	51159821	190.319	0.265653	0.235209	1.12943	0.258716	0.596674	FALSE	FALSE	inactive	'3-4	190	200	230	135	210	347	435	180.674	205.157	169.568	188.75	192.691	255.94	242.045
chr12	53397803	53398584	792.153	0.312557	0.103015	3.0341	0.00241256	0.0208316	FALSE	TRUE	not-induced	'3-4	657	763	790	509	644	998	1179	624.75	782.674	582.43	711.659	590.92	736.104	656.024
chr12	54764024	54764480	2060.61	-0.0890606	0.0948009	-0.939449	0.3475	0.677055	TRUE	TRUE	not-induced	'3-4	2651	2214	3187	1686	2661	3047	3416	2520.87	2271.09	2349.63	2357.28	2441.67	2247.4	1900.75
chr12	55051028	55051528	386.935	0.0440629	0.193592	0.227607	0.819952	0.928231	FALSE	FALSE	inactive	'3-4	229	222	316	182	242	290	456	217.759	227.724	232.972	254.464	222.054	213.898	253.73
chr12	56497731	56498228	3796.66	-0.0351261	0.100924	-0.348044	0.727807	0.889272	TRUE	TRUE	not-induced	'3-4	3095	2565	3633	1986	3189	3973	3639	2943.08	2631.14	2678.44	2776.73	2926.15	2930.4	2024.83
[truncated: 9,554 more rows]
